# Supplementary material
Source: PubMed Central journal article supplement (PMC534520)

```
(* © Orly Alter 2004 *)
```

```
(* All Rights Reserved *)
```

```
<< LinearAlgebra`MatrixManipulation`;  
<< NumericalMath`TrigFit`;  
<< Graphics`Graphics`;  
<< Graphics`Arrow`;  
Off[General::"spell"];  
Off[General::"spell1"];
```

```
(* Calculate GSVD Yeast and Human Common Cell Cycle Subspace *)
```

```
(* Read Yeast Data *)
```

```
stream = "Desktop/Networks/Data/Y_GSVD.txt.nb";  
matrix = ReadList[stream, Word, RecordLists -> True, NullWords -> True];  
{genes, arrays} = Dimensions[matrix] - {2, 6}  
Clear[stream];
```

```
{4523, 18}
```

```
genenames = TakeRows [  
  TakeColumns[matrix, {1, 6}],  
  {3, genes + 2}];  
arraynames = TakeColumns [  
  TakeRows[matrix, {1, 2}],  
  {7, arrays + 6}];  
matrix = TakeColumns [  
  TakeRows[matrix, {3, genes + 2}],  
  {7, arrays + 6}];  
matrix = ToExpression[matrix];
```

```
sizes = Flatten [  
  Table [  
    Dimensions [  
      Characters [  
        ToString[arraynames[[2, a]]  
        ]],  
    {a, 1, arrays}]];  
size = Sort[sizes, OrderedQ[{{#2, #1}} &]][[1]];  
Do [  
  Do[arraynames[[2, a]] = StringJoin[ToString[arraynames[[2, a]]], " "],  
  {b, 1, size - sizes[[a]]},  
  {a, 1, arrays}];
```

```
(* Estimate Missing Yeast Data Using SVD *)
```

```
(* Count Null Data *)
```

```
counter = Table[Dimensions[Position[matrix[[a]], Null]][[1]], {a, 1, genes}];
```

```
(* Locate Gene Position of Null Data *)
```

```
Clear[positions];  
positions = Table[0, {a, 1, arrays + 1}];  
Do[  
  positions[[a]] = Flatten[  
    Position[Flatten[counter], a - 1],  
    {a, 1, arrays + 1}];  
  numbers = Flatten[  
    Table[  
      Dimensions[positions[[a]]],  
      {a, 1, Round[arrays * 0.2]}];
```

```
(* Create Display Of Gene Position Of Null Data *)
```

```
framex = Table[{a, a - 1}, {a, 1, Round[arrays * 0.2]}];  
framey = {500, 1000, 1500, 2000, 2500, 3000};  
labelx = ColumnForm[{"Number of Arrays"}, Center];  
labely = ColumnForm[{"Number of Genes"}, Center];  
g = BarChart[numbers,  
  Frame -> True,  
  Axes -> False,  
  FrameLabel -> {labelx, labely, None, None},  
  FrameTicks -> {framex, framey, None, None},  
  GridLines -> {None, None},  
  PlotRange -> {{0.5, Round[arrays * 0.2] + 0.5}, {0, 3000}},  
  DisplayFunction -> Identity];  
g = FullGraphics[g];  
g[[1, 2]] = g[[1, 2]] /.  
  Text[labely, {b_, c_}, {1., 0.}] ->  
  Text[labely, {b - 0.75, c}, {0, 0}, {0, 1}];  
g[[1, 2]] = g[[1, 2]] /.  
  Text[labelx, {b_, c_}, {0., 1.}] ->  
  Text[labelx, {b, c - 400}, {0, 1}, {1, 0}];  
g[[1, 2]] = g[[1, 2]] /.  
  Text[a_, {b_, c_}, {0., 1.}] ->  
  Text[a, {b, c - 200}, {0, 0}, {0, 1}];
```

```
(* Display Gene Position Of Null Data *)
```

```
Show[g, PlotRange -> All];
```

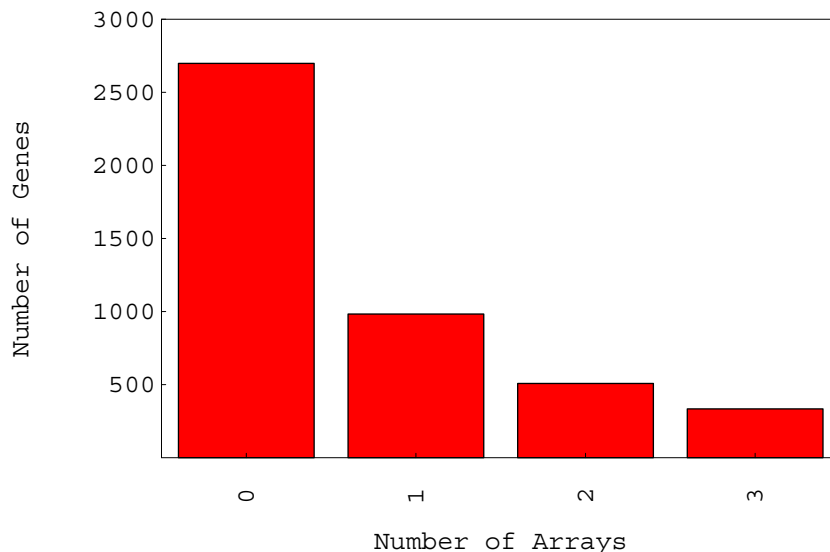

(\* Select Genes by Number of Missing Data Points \*)

```
matrix = AppendRows[Table[{counter[[a]]}, {a, 1, genes}], genenames, matrix];
matrix = Sort[matrix, OrderedQ[{#1, #2} &]];
fullgenenames = TakeColumns[
  TakeRows[matrix, {1, numbers[[1]]}],
  {2, 7}];
fullmatrix = TakeColumns[
  TakeRows[matrix, {1, numbers[[1]]}],
  {8, arrays + 7}];
missinggenenames1 = TakeColumns[
  TakeRows[matrix, {numbers[[1]] + 1, numbers[[1]] + numbers[[2]]}],
  {2, 7}];
missingmatrix1 = TakeColumns[
  TakeRows[matrix, {numbers[[1]] + 1, numbers[[1]] + numbers[[2]]}],
  {8, arrays + 7}];
missinggenenames2 = TakeColumns[
  TakeRows[matrix,
    {numbers[[1]] + numbers[[2]] + 1,
     numbers[[1]] + numbers[[2]] + numbers[[3]]}],
  {2, 7}];
missingmatrix2 = TakeColumns[
  TakeRows[matrix,
    {numbers[[1]] + numbers[[2]] + 1,
     numbers[[1]] + numbers[[2]] + numbers[[3]]}],
  {8, arrays + 7}];
missinggenenames3 = TakeColumns[
  TakeRows[matrix,
    {numbers[[1]] + numbers[[2]] + numbers[[3]] + 1,
     numbers[[1]] + numbers[[2]] + numbers[[3]] + numbers[[4]]}],
  {2, 7}];
missingmatrix3 = TakeColumns[
  TakeRows[matrix,
    {numbers[[1]] + numbers[[2]] + numbers[[3]] + 1,
     numbers[[1]] + numbers[[2]] + numbers[[3]] + numbers[[4]]}],
  {8, arrays + 7}];
```

(\* Locate Array Position of Null Data \*)

```
locator1 = Table[0, {numbers[[2]]}];
Do[
  locator1[[a]] = locator1[[a]] + Flatten[Position[missingmatrix1[[a]], Null]],
  {a, 1, numbers[[2]]}];
locator2 = Table[0, {numbers[[3]]}];
Do[
  locator2[[a]] = locator2[[a]] + Flatten[Position[missingmatrix2[[a]], Null]],
  {a, 1, numbers[[3]]}];
locator3 = Table[0, {numbers[[4]]}];
Do[
  locator3[[a]] = locator3[[a]] + Flatten[Position[missingmatrix3[[a]], Null]],
  {a, 1, numbers[[4]]}];
```

```
(* Sort Raw Data According to the Position of Missing Data Points for Each Gene *)
```

```
missingmatrix1 = AppendRows[locator1, missinggenenames1, missingmatrix1];  
missingmatrix1 = Sort[missingmatrix1, OrderedQ[{{#1, #2}} &];  
locator1 = TakeColumns[missingmatrix1, {1, 1}];  
missinggenenames1 = TakeColumns[missingmatrix1, {2, 7}];  
missingmatrix1 = TakeColumns[missingmatrix1, {8, arrays + 7}];  
missingmatrix2 = AppendRows[locator2, missinggenenames2, missingmatrix2];  
missingmatrix2 = Sort[missingmatrix2, OrderedQ[{{#1, #2}} &];  
locator2 = TakeColumns[missingmatrix2, {1, 2}];  
missinggenenames2 = TakeColumns[missingmatrix2, {3, 8}];  
missingmatrix2 = TakeColumns[missingmatrix2, {9, arrays + 8}];  
missingmatrix3 = AppendRows[locator3, missinggenenames3, missingmatrix3];  
missingmatrix3 = Sort[missingmatrix3, OrderedQ[{{#1, #2}} &];  
locator3 = TakeColumns[missingmatrix3, {1, 3}];  
missinggenenames3 = TakeColumns[missingmatrix3, {4, 9}];  
missingmatrix3 = TakeColumns[missingmatrix3, {10, arrays + 9}];
```

```
(* Examine Subset of Genes with Full Data *)
```

```
(* Calculate SVD *)
```

```
{eigenarrays, eigenexpressions, eigengenes} = SingularValues[fullmatrix];  
eigengenes[[5]] = -eigengenes[[5]];  
eigenarrays[[5]] = -eigenarrays[[5]];  
eigenarrays = Transpose[eigenarrays];  
fractions = eigenexpressions^2 / Sum[eigenexpressions[[a]]^2, {a, 1, arrays}];  
entropy = -N[Sum[fractions[[a]] * Log[fractions[[a]]], {a, 1, arrays}] / Log[arrays];  
entropy = N[Round[100 * entropy] / 100]
```

```
0.17
```

```
(* Create Fractions Bar Charts Displays *)
```

```
fractions[[3]]
```

```
0.00817395
```

```
limit = 0.01;
```

```
Clear[gridx, framex, framey, sizes];  
gridx = Table[a, {a, 0, limit, N[limit/5]}];  
framex = gridx;  
sizes = Flatten[  
  Table[  
    Dimensions[  
      Characters[  
        ToString[framex[[a]]  
      ]], {a, 1, 6}];  
Do[  
  Do[framex[[a]] = StringJoin[ToString[framex[[a]]], " "],  
    {b, 1, 5 - sizes[[a]]},  
    {a, 1, 6};  
framex = Table[{gridx[[a]], framex[[a]]}, {a, 1, 6};  
gridx = Table[{gridx[[a]], RGBColor[0, 0, 0]}, {a, 1, 6};  
framey = Table[{a + 1, arrays - a - 6}, {a, 0, 12 - 3};  
table = Table[fractions[[arrays - a]], {a, 6, arrays - 3};
```

```

g = BarChart[table,
  BarOrientation -> Horizontal,
  PlotRange -> {{0, limit * 1.0001}, {0.5, 12 - 2 + 0.5}},
  AspectRatio -> 1,
  Axes -> False,
  Frame -> True,
  FrameTicks -> {None, framey, framex, None},
  FrameLabel -> {None, None, None, None},
  GridLines -> {gridx, None},
  DisplayFunction -> Identity];
g = FullGraphics[g];
g[[1, 2]] = g[[1, 2]] /.
  Text[a_, {b_, c_}, {0., -1.}] ->
  Text[a, {b, c + 1.75}, {0, 0}, {0, 1}];
g1 = Show[g,
  AspectRatio -> 1.25,
  PlotRange -> All,
  DisplayFunction -> Identity];

gridx = Table[a, {a, 0, 1, 0.2}];
framex = gridx;
sizes = Flatten[
  Table[
    Dimensions[
      Characters[
        ToString[framex[[a]]
      ]], {a, 1, 6}]];
Do[
  Do[framex[[a]] = StringJoin[ToString[framex[[a]]], " "],
  {b, 1, size - sizes[[a]]}],
  {a, 1, 6}];
framex = Table[{gridx[[a]], framex[[a]]}, {a, 1, 6}];
gridx = Table[{gridx[[a]], RGBColor[0, 0, 0]}, {a, 1, 6}];
framey = Table[{a + 1, arrays - a}, {a, 0, arrays - 1}];
labelx = ColumnForm[
  {"(b) Eigenexpression Fraction", StringJoin["di = ", ToString[entropy]], " "},
  Center];
g = BarChart[
  Table[fractions[[arrays - a]], {a, 0, arrays - 1}],
  BarOrientation -> Horizontal,
  PlotRange -> {{0, 1.0001}, {0.5, arrays + 0.5}},
  AspectRatio -> 1,
  Axes -> False,
  Frame -> True,
  FrameTicks -> {None, framey, framex, None},
  FrameLabel -> {None, None, labelx, None},
  GridLines -> {gridx, None},
  DisplayFunction -> Identity];
g = FullGraphics[g];
g[[1, 2]] = g[[1, 2]] /.
  Text[labelx, {b_, c_}, {0., -1.}] ->
  Text[labelx, {b, c + 3}, {0, -1}, {1, 0}];
g[[1, 2]] = g[[1, 2]] /.
  Text[a_, {b_, c_}, {0., -1.}] ->
  Text[a, {b, c + 2.7}, {0, 0}, {0, 1}];
g2 = Show[{g,
  Graphics[{RGBColor[1, 1, 0.8], Rectangle[{0.1, 0.6}, {0.98, 16.6}]}],
  Graphics[{Rectangle[{0.1, 0.6}, {0.98, 16.6}, g1]}]},
  AspectRatio -> 1.35,
  PlotRange -> All,
  DisplayFunction -> Identity];

```

(\* Create Eigengenes 2 D Red & Green Raster Display \*)

```
contrast = 3.5;
displaying = Table[
  If[contrast * eigengenes[[i, j]] > 0,
    If[contrast * eigengenes[[i, j]] < 1, {contrast * eigengenes[[i, j]], 0}, {1, 0}],
    If[contrast * eigengenes[[i, j]] > -1, {0, -contrast * eigengenes[[i, j]]}, {0, 1}]],
  {i, 1, arrays}, {j, 1, arrays}];
framex = Table[{a - 0.5, arraynames[[2, a]]}, {a, 1, arrays}];
framey = Table[{a + 1 - 0.5, arrays - a}, {a, 0, arrays - 1}];
labely = "Eigengenes";
labelx = ColumnForm[{"(a) Arrays", " ", " "}, Center];
```

```
g = Show[
  Graphics[
    RasterArray[
      Table[
        RGBColor[displaying[[i, j, 1]], displaying[[i, j, 2]], 0],
        {i, arrays, 1, -1}, {j, 1, arrays}]]],
  AspectRatio -> 1,
  Frame -> True,
  FrameTicks -> {None, framey, framex, None},
  FrameLabel -> {None, labely, labelx, None},
  DisplayFunction -> Identity];
g = FullGraphics[g];
g[[1, 2]] = g[[1, 2]] /.
  Text[labely, {b_, c_}, {1., 0.}] ->
  Text[labely, {b - 3, c}, {0, 0}, {0, 1}];
g[[1, 2]] = g[[1, 2]] /.
  Text[labelx, {b_, c_}, {0., -1.}] ->
  Text[labelx, {b, c + 3}, {0, -1}, {1, 0}];
g[[1, 2]] = g[[1, 2]] /.
  Text[a_, {b_, c_}, {0., -1.}] ->
  Text[a, {b, c + 2.7}, {0, 0}, {0, 1}];
g1 = Show[g,
  AspectRatio -> 1.05,
  PlotRange -> All,
  DisplayFunction -> Identity];
```

(\* Create Selected Eigengenes Graph Display \*)

```
eigengenes3 = Chop[TrigFit[Drop[eigengenes[[3]], {1}], 2, {x - 1, arrays - 1}], 0.15]
eigengenes4 = Chop[TrigFit[Drop[eigengenes[[4]], {1}], 2, {x - 1, arrays - 1}], 0.15]
eigengenes5 = Chop[TrigFit[Drop[eigengenes[[5]], {1}], 2, {x - 1, arrays - 1}], 0.15]
```

$$-0.152794 \cos\left[\frac{2}{17} \pi (-1 + x)\right] - 0.154139 \sin\left[\frac{2}{17} \pi (-1 + x)\right] - 0.197288 \sin\left[\frac{4}{17} \pi (-1 + x)\right]$$

$$0.263474 \cos\left[\frac{4}{17} \pi (-1 + x)\right]$$

$$0.157833 \cos\left[\frac{4}{17} \pi (-1 + x)\right] - 0.204812 \sin\left[\frac{4}{17} \pi (-1 + x)\right]$$

```
eigengenes3 = -Sqrt[2/3/17.] * Sin[4 * Pi * (x - 1) / 17] - Sqrt[2/3/17.] * Sin[2 * Pi * (x - 1) / 17 + Pi / 4];
eigengenes4 = Sqrt[2/17.] * Cos[4 * Pi * (x - 1) / 17];
eigengenes5 = Sqrt[2/17.] * Cos[4 * Pi * (x - 1) / 17 + Pi / 4];
```

```

labelx = ColumnForm[{"(c) Arrays"}, Center];
labely = ColumnForm[{" ", "Expression Level"}, Center];
framex = Table[{a - 1, arraynames[[2, a]]}, {a, 1, arrays}];
framey = {-1, -0.5, 0, 0.5, 1};
coordinates = Table[{a - 1, eigengenes[[1, a]]}, {a, 1, arrays}];
points = Table[Point[coordinates[[a]]], {a, 1, arrays}];
line = Line[coordinates];
g = Show[
  {Graphics[{RGBColor[1, 0, 0], PointSize[0.022], points}},
  Graphics[{RGBColor[1, 0, 0], line}}],
  Frame -> True,
  FrameLabel -> {None, labely, labelx, None},
  GridLines -> {None, {{0, RGBColor[0, 0, 0]}}},
  FrameTicks -> {None, framey, framex, None},
  PlotRange -> {-1.05, 1.05},
  DisplayFunction -> Identity];
g = FullGraphics[g];
g[[1, 2]] = g[[1, 2]] /.
  Text[labely, {b_, c_}, {1., 0.}] ->
  Text[labely, {b - 5.4, c}, {0, 0}, {0, 1}];
g[[1, 2]] = g[[1, 2]] /.
  Text[labelx, {b_, c_}, {0., -1.}] ->
  Text[labelx, {b, c + 0.625}, {0, -1}, {1, 0}];
g[[1, 2]] = g[[1, 2]] /.
  Text[a_, {b_, c_}, {0., -1.}] ->
  Text[a, {b, c + 0.25}, {0, 0}, {0, 1}];
p1 = Show[g,
  AspectRatio -> 1.05,
  PlotRange -> All,
  DisplayFunction -> Identity];

labelx = ColumnForm[{"(c) Arrays"}, Center];
labely = ColumnForm[{" ", "Expression Level"}, Center];
framex = Table[{a - 1, arraynames[[2, a]]}, {a, 1, arrays}];
framey = {-1, -0.5, 0, 0.5, 1};
coordinates = Table[{a - 1, eigengenes[[2, a]]}, {a, 1, arrays}];
points = Table[Point[coordinates[[a]]], {a, 1, arrays}];
line = Line[coordinates];
g = Show[
  {Graphics[{RGBColor[0, 0, 1], PointSize[0.022], points}},
  Graphics[{RGBColor[0, 0, 1], line}}],
  Frame -> True,
  FrameLabel -> {None, labely, labelx, None},
  GridLines -> {None, {{0, RGBColor[0, 0, 0]}}},
  FrameTicks -> {None, framey, framex, None},
  PlotRange -> {-1.05, 1.05},
  DisplayFunction -> Identity];
g = FullGraphics[g];
g[[1, 2]] = g[[1, 2]] /.
  Text[labely, {b_, c_}, {1., 0.}] ->
  Text[labely, {b - 5.4, c}, {0, 0}, {0, 1}];
g[[1, 2]] = g[[1, 2]] /.
  Text[labelx, {b_, c_}, {0., -1.}] ->
  Text[labelx, {b, c + 0.625}, {0, -1}, {1, 0}];
g[[1, 2]] = g[[1, 2]] /.
  Text[a_, {b_, c_}, {0., -1.}] ->
  Text[a, {b, c + 0.25}, {0, 0}, {0, 1}];
p2 = Show[g,
  AspectRatio -> 1.05,
  PlotRange -> All,
  DisplayFunction -> Identity];

```

```

graph = Plot[eigengenes3,
  {x, 1, arrays - 1},
  PlotStyle -> {RGBColor[1, 0, 0], Dashing[{0.03, 0.02}]},
  DisplayFunction -> Identity];
labelx = ColumnForm[{"(d) Arrays"}, Center];
labely = ColumnForm[{" ", "Expression Level"}, Center];
framex = Table[{a - 1, arraynames[[2, a]]}, {a, 1, arrays}];
framey = {-1, -0.5, 0, 0.5, 1};
coordinates = Table[{a - 1, eigengenes[[3, a]]}, {a, 1, arrays}];
points = Table[Point[coordinates[[a]]], {a, 1, arrays}];
line = Line[coordinates];
g = Show[
  {Graphics[{RGBColor[1, 0, 0], PointSize[0.022], points}],
  Graphics[{RGBColor[1, 0, 0], line}],
  graph,

  Graphics[{RGBColor[1, 0, 0], Text["- $\sqrt{\frac{2}{3T}} [\sin(\frac{2\pi t}{T} + \frac{\pi}{4})]$ "], {6.5, 0.75}]}],

  Graphics[{RGBColor[1, 0, 0], Text[" $\sin(\frac{4\pi t}{T})$ "], {13.5, 0.5}]}]},
  Frame -> True,
  FrameLabel -> {None, labely, labelx, None},
  GridLines -> {None, {{0, RGBColor[0, 0, 0]}}},
  FrameTicks -> {None, framey, framex, None},
  PlotRange -> {-1.05, 1.05},
  DisplayFunction -> Identity];
g = FullGraphics[g];
g[[1, 2]] = g[[1, 2]] /.
  Text[labely, {b_, c_}, {1., 0.}] ->
  Text[labely, {b - 5.4, c}, {0, 0}, {0, 1}];
g[[1, 2]] = g[[1, 2]] /.
  Text[labelx, {b_, c_}, {0., -1.}] ->
  Text[labelx, {b, c + 0.625}, {0, -1}, {1, 0}];
g[[1, 2]] = g[[1, 2]] /.
  Text[a_, {b_, c_}, {0., -1.}] ->
  Text[a, {b, c + 0.25}, {0, 0}, {0, 1}];
p3 = Show[g,
  AspectRatio -> 1.05,
  PlotRange -> All,
  DisplayFunction -> Identity];

```



```

graph = Plot[eigengenes4,
  {x, 1, arrays - 1},
  PlotStyle -> {RGBColor[0, 0, 1], Dashing[{0.03, 0.02}]},
  DisplayFunction -> Identity];
labelx = ColumnForm[{"(e) Arrays"}, Center];
labely = ColumnForm[{" ", " "}, Center];
framex = Table[{a - 1, arraynames[[2, a]]}, {a, 1, arrays}];
framey = {-1, -0.5, 0, 0.5, 1};
coordinates = Table[{a - 1, eigengenes[[4, a]]}, {a, 1, arrays}];
points = Table[Point[coordinates[[a]]], {a, 1, arrays}];
line = Line[coordinates];
g = Show[
  {Graphics[{RGBColor[0, 0, 1], PointSize[0.022], points}},
  Graphics[{RGBColor[0, 0, 1], line}},
  graph,

  Graphics[{RGBColor[0, 0, 1], Text[" $\sqrt{\frac{2}{T}} \cos(\frac{4\pi t}{T})$ ", {8.5, 0.7}]}]},
  Frame -> True,
  FrameLabel -> {None, labely, labelx, None},
  GridLines -> {None, {{0, RGBColor[0, 0, 0]}}},
  FrameTicks -> {None, framey, framex, None},
  PlotRange -> {-1.05, 1.05},
  DisplayFunction -> Identity];
g = FullGraphics[g];
g[[1, 2]] = g[[1, 2]] /.
  Text[labely, {b_, c_}, {1., 0.}] ->
  Text[labely, {b - 5.4, c}, {0, 0}, {0, 1}];
g[[1, 2]] = g[[1, 2]] /.
  Text[labelx, {b_, c_}, {0., -1.}] ->
  Text[labelx, {b, c + 0.625}, {0, -1}, {1, 0}];
g[[1, 2]] = g[[1, 2]] /.
  Text[a_, {b_, c_}, {0., -1.}] ->
  Text[a, {b, c + 0.25}, {0, 0}, {0, 1}];
p4 = Show[g,
  AspectRatio -> 1.05,
  PlotRange -> All,
  DisplayFunction -> Identity];

```

```

graph = Plot[eigengenes5,
  {x, 1, arrays - 1},
  PlotStyle -> {RGBColor[0, 0.5, 0], Dashing[{0.03, 0.02}]},
  DisplayFunction -> Identity];
labelx = ColumnForm[{"(f) Arrays"}, Center];
labely = ColumnForm[{" ", " "}, Center];
framex = Table[{a - 1, arraynames[[2, a]]}, {a, 1, arrays}];
framey = {-1, -0.5, 0, 0.5, 1};
coordinates = Table[{a - 1, eigengenes[[5, a]]}, {a, 1, arrays}];
points = Table[Point[coordinates[[a]]], {a, 1, arrays}];
line = Line[coordinates];
g = Show[
  {Graphics[{RGBColor[0, 0.5, 0], PointSize[0.022], points}],
  Graphics[{RGBColor[0, 0.5, 0], line}],
  graph,
  Graphics[{RGBColor[0, 0.5, 0], Text[" $\sqrt{\frac{2}{T}} \cos(\frac{4\pi t}{T} + \frac{\pi}{4})$ ", {8.5, 0.7}]}]},
  Frame -> True,
  FrameLabel -> {None, labely, labelx, None},
  GridLines -> {None, {{0, RGBColor[0, 0, 0]}}},
  FrameTicks -> {None, framey, framex, None},
  PlotRange -> {-1.05, 1.05},
  DisplayFunction -> Identity];
g = FullGraphics[g];
g[[1, 2]] = g[[1, 2]] /.
  Text[labely, {b_, c_}, {1., 0.}] ->
  Text[labely, {b - 5.4, c}, {0, 0}, {0, 1}];
g[[1, 2]] = g[[1, 2]] /.
  Text[labelx, {b_, c_}, {0., -1.}] ->
  Text[labelx, {b, c + 0.625}, {0, -1}, {1, 0}];
g[[1, 2]] = g[[1, 2]] /.
  Text[a_, {b_, c_}, {0., -1.}] ->
  Text[a, {b, c + 0.25}, {0, 0}, {0, 1}];
p5 = Show[g,
  AspectRatio -> 1.05,
  PlotRange -> All,
  DisplayFunction -> Identity];

```

(\* Display Selected Eigengenes \*)

```
g3 = Show[{p2, p1},
  DisplayFunction -> Identity];
```

(\* Display Eigengenes, Fractions and Selected Eigengenes \*)

```
Show[GraphicsArray[{g1, g2, g3}],
  GraphicsSpacing -> -0.15];
```

(a) Arrays

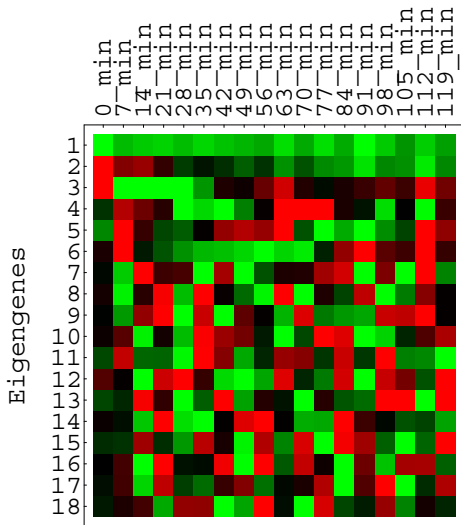

(b) Eigenexpression Fraction

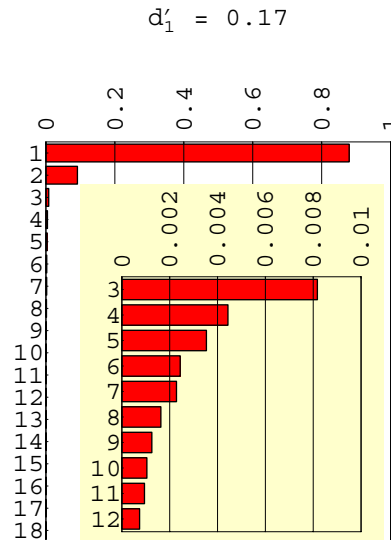

(c) Arrays

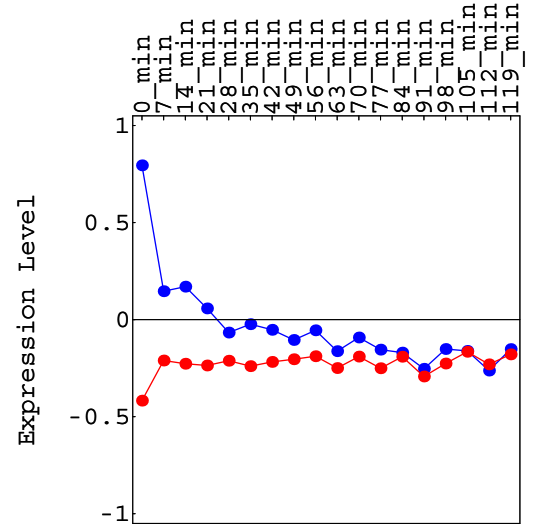

```
Show[GraphicsArray[{p3, p4, p5}],
  GraphicsSpacing -> -0.15];
```

(d) Arrays

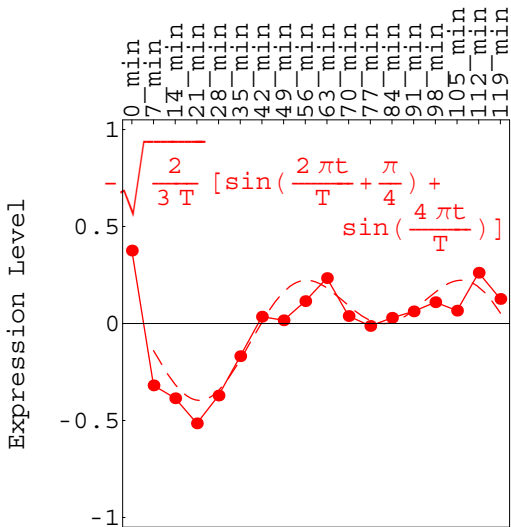

(e) Arrays

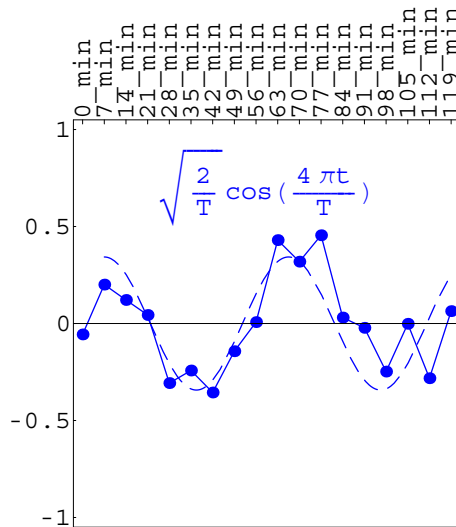

(f) Arrays

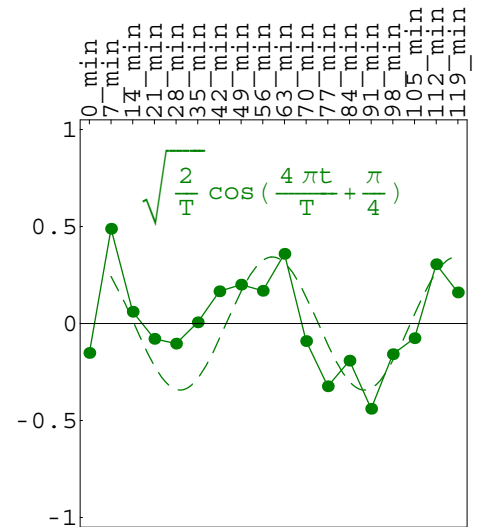

```
(* Choose Subset of Eigengenes for Estimation *)
```

```
eigengenes = TakeRows[eigengenes, {1, 5}];
```

```
(* Estimate Missing Data *)
```

```
Do[
  missingmatrix1[[a, locator1[[a, 1]]] =
    N[Round[Flatten[Dot[Dot[
      Transpose[Drop[
        Transpose[{missingmatrix1[[a]]}],
        {locator1[[a, 1]]}],
      PseudoInverse[Transpose[Drop[
        Transpose[eigengenes],
        {locator1[[a, 1]]}],
      eigengenes]][[locator1[[a, 1]]] * 100] / 100],
    {a, 1, numbers[[2]]}]

Do[Do[
  missingmatrix2[[a, locator2[[a, b]]] =
    N[Round[Flatten[Dot[Dot[
      Transpose[Drop[Drop[
        Transpose[{missingmatrix2[[a]]}],
        {locator2[[a, 2]]}, {locator2[[a, 1]]}],
      PseudoInverse[Transpose[Drop[Drop[
        Transpose[eigengenes],
        {locator2[[a, 2]]}, {locator2[[a, 1]]}],
      eigengenes]][[locator2[[a, b]]] * 100] / 100],
    {b, 1, 2}],
  {a, 1, numbers[[3]]}]

Do[Do[
  missingmatrix3[[a, locator3[[a, b]]] =
    N[Round[Flatten[Dot[Dot[
      Transpose[Drop[Drop[Drop[
        Transpose[{missingmatrix3[[a]]}],
        {locator3[[a, 3]]}, {locator3[[a, 2]]}, {locator3[[a, 1]]}],
      PseudoInverse[Transpose[Drop[Drop[Drop[
        Transpose[eigengenes],
        {locator3[[a, 3]]}, {locator3[[a, 2]]}, {locator3[[a, 1]]}],
      eigengenes]][[locator3[[a, b]]] * 100] / 100],
    {b, 1, 3}],
  {a, 1, numbers[[4]]}]

genenames = AppendColumns[
  fullgenenames,
  missinggenenames1,
  missinggenenames2,
  missinggenenames3];
matrix = AppendColumns[
  fullmatrix,
  missingmatrix1,
  missingmatrix2,
  missingmatrix3];
{genes, arrays} = Dimensions[matrix];
matrix1 = matrix;
genenames1 = genenames;
arraynames1 = arraynames;
{genes1, arrays1} = Dimensions[matrix1]

{4523, 18}
```

```
(* Examine Yeast Data After Missing Data Estimation *)
```

```
(* Calculate SVD *)
```

```
{eigenarrays, eigenexpressions, eigengenex} = SingularValues[matrix];  
eigenarrays = Transpose[eigenarrays];  
fractions = eigenexpressions^2 / Sum[eigenexpressions[[a]]^2, {a, 1, arrays}];  
entropy = -N[Sum[fractions[[a]] * Log[fractions[[a]]], {a, 1, arrays}] / Log[arrays];  
entropy = N[Round[100 * entropy] / 100]
```

```
0.17
```

```
(* Create Fractions Bar Charts Displays *)
```

```
fractions[[3]]  
  
0.0089566  
  
limit = 0.01;  
  
Clear[gridx, framex, framey, sizes];  
gridx = Table[a, {a, 0, limit, N[limit/5]}];  
framex = gridx;  
sizes = Flatten[  
  Table[  
    Dimensions[  
      Characters[  
        ToString[framex[[a]]  
        ]], {a, 1, 6}];  
Do[  
  Do[framex[[a]] = StringJoin[ToString[framex[[a]]], " "],  
    {b, 1, 5 - sizes[[a]]},  
    {a, 1, 6}];  
framex = Table[{gridx[[a]], framex[[a]]}, {a, 1, 6}];  
gridx = Table[{gridx[[a]], RGBColor[0, 0, 0]}, {a, 1, 6}];  
framey = Table[{a + 1, arrays - a - 6}, {a, 0, 12 - 3}];  
table = Table[fractions[[arrays - a]], {a, 6, arrays - 3}];  
g = BarChart[table,  
  BarOrientation -> Horizontal,  
  PlotRange -> {{0, limit * 1.0001}, {0.5, 12 - 2 + 0.5}},  
  AspectRatio -> 1,  
  Axes -> False,  
  Frame -> True,  
  FrameTicks -> {None, framey, framex, None},  
  FrameLabel -> {None, None, None, None},  
  GridLines -> {gridx, None},  
  DisplayFunction -> Identity];  
g = FullGraphics[g];  
g[[1, 2]] = g[[1, 2]] /.  
  Text[a_, {b_, c_}, {0., -1.}] ->  
  Text[a, {b, c + 1.75}, {0, 0}, {0, 1}];  
g1 = Show[g,  
  AspectRatio -> 1.25,  
  PlotRange -> All,  
  DisplayFunction -> Identity];
```

```

gridx = Table[a, {a, 0, 1, 0.2}];
framex = gridx;
sizes = Flatten[
  Table[
    Dimensions[
      Characters[
        ToString[framex[[a]]
      ]], {a, 1, 6}]];
Do[
  Do[framex[[a]] = StringJoin[ToString[framex[[a]]], " ",
    {b, 1, size - sizes[[a]]}],
    {a, 1, 6}];
framex = Table[{gridx[[a]], framex[[a]]}, {a, 1, 6}];
gridx = Table[{gridx[[a]], RGBColor[0, 0, 0]}, {a, 1, 6}];
framey = Table[{a + 1, arrays - a}, {a, 0, arrays - 1}];
labelx = ColumnForm[
  {"(b) Eigenexpression Fraction", StringJoin["di = ", ToString[entropy]], " "},
  Center];
g = BarChart[
  Table[fractions[[arrays - a]], {a, 0, arrays - 1}],
  BarOrientation -> Horizontal,
  PlotRange -> {{0, 1.0001}, {0.5, arrays + 0.5}},
  AspectRatio -> 1,
  Axes -> False,
  Frame -> True,
  FrameTicks -> {None, framey, framex, None},
  FrameLabel -> {None, None, labelx, None},
  GridLines -> {gridx, None},
  DisplayFunction -> Identity];
g = FullGraphics[g];
g[[1, 2]] = g[[1, 2]] /.
  Text[labelx, {b_, c_}, {0., -1.}] ->
  Text[labelx, {b, c + 3}, {0, -1}, {1, 0}];
g[[1, 2]] = g[[1, 2]] /.
  Text[a_, {b_, c_}, {0., -1.}] ->
  Text[a, {b, c + 2.7}, {0, 0}, {0, 1}];
g2 = Show[{g,
  Graphics[{RGBColor[1, 1, 0.8], Rectangle[{0.1, 0.6}, {0.98, 16.6}]},
  Graphics[{Rectangle[{0.1, 0.6}, {0.98, 16.6}, g1]}]},
  AspectRatio -> 1.35,
  PlotRange -> All,
  DisplayFunction -> Identity];

(* Create Eigengenes 2 D Red & Green Raster Display *)

contrast = 3.5;
displaying = Table[
  If[contrast * eigengenes[[i, j]] > 0,
    If[contrast * eigengenes[[i, j]] < 1, {contrast * eigengenes[[i, j]], 0}, {1, 0}],
    If[contrast * eigengenes[[i, j]] > -1, {0, -contrast * eigengenes[[i, j]]}, {0, 1}],
  {i, 1, arrays}, {j, 1, arrays}];
framex = Table[{a - 0.5, arraynames[[2, a]]}, {a, 1, arrays}];
framey = Table[{a + 1 - 0.5, arrays - a}, {a, 0, arrays - 1}];
labely = "Eigengenes";
labelx = ColumnForm[{"(a) Arrays", " ", " "}, Center];

```

```

g = Show[
  Graphics[
    RasterArray[
      Table[
        RGBColor[displaying[[i, j, 1]], displaying[[i, j, 2]], 0],
        {i, arrays, 1, -1}, {j, 1, arrays}]]],
  AspectRatio -> 1,
  Frame -> True,
  FrameTicks -> {None, framey, framex, None},
  FrameLabel -> {None, labely, labelx, None},
  DisplayFunction -> Identity];
g = FullGraphics[g];
g[[1, 2]] = g[[1, 2]] /.
  Text[labely, {b_, c_}, {1., 0.}] ->
  Text[labely, {b - 3, c}, {0, 0}, {0, 1}];
g[[1, 2]] = g[[1, 2]] /.
  Text[labelx, {b_, c_}, {0., -1.}] ->
  Text[labelx, {b, c + 3}, {0, -1}, {1, 0}];
g[[1, 2]] = g[[1, 2]] /.
  Text[a_, {b_, c_}, {0., -1.}] ->
  Text[a, {b, c + 2.7}, {0, 0}, {0, 1}];
g1 = Show[g,
  AspectRatio -> 1.05,
  PlotRange -> All,
  DisplayFunction -> Identity];

(* Create Selected Eigengenes Graph Display *)

eigengenes3 = Chop[TrigFit[Drop[eigengenes[[3]], {1}], 2, {x - 1, arrays - 1}], 0.125]
eigengenes4 = Chop[TrigFit[Drop[eigengenes[[4]], {1}], 2, {x - 1, arrays - 1}], 0.15]
eigengenes5 = Chop[TrigFit[Drop[eigengenes[[5]], {1}], 2, {x - 1, arrays - 1}], 0.15]

-0.135652 Cos[ $\frac{2}{17} \pi (-1 + x)$ ] - 0.144566 Sin[ $\frac{2}{17} \pi (-1 + x)$ ] - 0.221702 Sin[ $\frac{4}{17} \pi (-1 + x)$ ]

0.262143 Cos[ $\frac{4}{17} \pi (-1 + x)$ ]

0.158409 Cos[ $\frac{4}{17} \pi (-1 + x)$ ] - 0.194379 Sin[ $\frac{4}{17} \pi (-1 + x)$ ]

eigengenes3 = -Sqrt[2 / 3 / 17.] * Sin[4 * Pi * (x - 1) / 17] - Sqrt[2 / 3 / 17.] * Sin[2 * Pi * (x - 1) / 17 + Pi / 4];
eigengenes4 = Sqrt[2 / 17.] * Cos[4 * Pi * (x - 1) / 17];
eigengenes5 = Sqrt[2 / 17.] * Cos[4 * Pi * (x - 1) / 17 + Pi / 4];

```

```

labelx = ColumnForm[{"(c) Arrays"}, Center];
labely = ColumnForm[{" ", "Expression Level"}, Center];
framex = Table[{a - 1, arraynames[[2, a]]}, {a, 1, arrays}];
framey = {-1, -0.5, 0, 0.5, 1};
coordinates = Table[{a - 1, eigengenes[[1, a]]}, {a, 1, arrays}];
points = Table[Point[coordinates[[a]]], {a, 1, arrays}];
line = Line[coordinates];
g = Show[
  {Graphics[{RGBColor[1, 0, 0], PointSize[0.022], points}},
  Graphics[{RGBColor[1, 0, 0], line}}],
  Frame -> True,
  FrameLabel -> {None, labely, labelx, None},
  GridLines -> {None, {{0, RGBColor[0, 0, 0]}}},
  FrameTicks -> {None, framey, framex, None},
  PlotRange -> {-1.05, 1.05},
  DisplayFunction -> Identity];
g = FullGraphics[g];
g[[1, 2]] = g[[1, 2]] /.
  Text[labely, {b_, c_}, {1., 0.}] ->
  Text[labely, {b - 5.4, c}, {0, 0}, {0, 1}];
g[[1, 2]] = g[[1, 2]] /.
  Text[labelx, {b_, c_}, {0., -1.}] ->
  Text[labelx, {b, c + 0.625}, {0, -1}, {1, 0}];
g[[1, 2]] = g[[1, 2]] /.
  Text[a_, {b_, c_}, {0., -1.}] ->
  Text[a, {b, c + 0.25}, {0, 0}, {0, 1}];
p1 = Show[g,
  AspectRatio -> 1.05,
  PlotRange -> All,
  DisplayFunction -> Identity];

labelx = ColumnForm[{"(c) Arrays"}, Center];
labely = ColumnForm[{" ", "Expression Level"}, Center];
framex = Table[{a - 1, arraynames[[2, a]]}, {a, 1, arrays}];
framey = {-1, -0.5, 0, 0.5, 1};
coordinates = Table[{a - 1, eigengenes[[2, a]]}, {a, 1, arrays}];
points = Table[Point[coordinates[[a]]], {a, 1, arrays}];
line = Line[coordinates];
g = Show[
  {Graphics[{RGBColor[0, 0, 1], PointSize[0.022], points}},
  Graphics[{RGBColor[0, 0, 1], line}}],
  Frame -> True,
  FrameLabel -> {None, labely, labelx, None},
  GridLines -> {None, {{0, RGBColor[0, 0, 0]}}},
  FrameTicks -> {None, framey, framex, None},
  PlotRange -> {-1.05, 1.05},
  DisplayFunction -> Identity];
g = FullGraphics[g];
g[[1, 2]] = g[[1, 2]] /.
  Text[labely, {b_, c_}, {1., 0.}] ->
  Text[labely, {b - 5.4, c}, {0, 0}, {0, 1}];
g[[1, 2]] = g[[1, 2]] /.
  Text[labelx, {b_, c_}, {0., -1.}] ->
  Text[labelx, {b, c + 0.625}, {0, -1}, {1, 0}];
g[[1, 2]] = g[[1, 2]] /.
  Text[a_, {b_, c_}, {0., -1.}] ->
  Text[a, {b, c + 0.25}, {0, 0}, {0, 1}];
p2 = Show[g,
  AspectRatio -> 1.05,
  PlotRange -> All,
  DisplayFunction -> Identity];

```



```

graph = Plot[eigengenes3,
  {x, 1, arrays - 1},
  PlotStyle -> {RGBColor[1, 0, 0], Dashing[{0.03, 0.02}]},
  DisplayFunction -> Identity];
labelx = ColumnForm[{"(d) Arrays"}, Center];
labely = ColumnForm[{" ", "Expression Level"}, Center];
framex = Table[{a - 1, arraynames[[2, a]]}, {a, 1, arrays}];
framey = {-1, -0.5, 0, 0.5, 1};
coordinates = Table[{a - 1, eigengenes[[3, a]]}, {a, 1, arrays}];
points = Table[Point[coordinates[[a]]], {a, 1, arrays}];
line = Line[coordinates];
g = Show[
  {Graphics[{RGBColor[1, 0, 0], PointSize[0.022], points}],
  Graphics[{RGBColor[1, 0, 0], line}],
  graph,

  Graphics[{RGBColor[1, 0, 0], Text["- $\sqrt{\frac{2}{3T}} [\sin(\frac{2\pi t}{T} + \frac{\pi}{4})]$ ", {6.5, 0.75}]}],

  Graphics[{RGBColor[1, 0, 0], Text[" $\sin(\frac{4\pi t}{T})$ ", {13.5, 0.5}]}]}],
  Frame -> True,
  FrameLabel -> {None, labely, labelx, None},
  GridLines -> {None, {{0, RGBColor[0, 0, 0]}}},
  FrameTicks -> {None, framey, framex, None},
  PlotRange -> {-1.05, 1.05},
  DisplayFunction -> Identity];
g = FullGraphics[g];
g[[1, 2]] = g[[1, 2]] /.
  Text[labely, {b_, c_}, {1., 0.}] ->
  Text[labely, {b - 5.4, c}, {0, 0}, {0, 1}];
g[[1, 2]] = g[[1, 2]] /.
  Text[labelx, {b_, c_}, {0., -1.}] ->
  Text[labelx, {b, c + 0.625}, {0, -1}, {1, 0}];
g[[1, 2]] = g[[1, 2]] /.
  Text[a_, {b_, c_}, {0., -1.}] ->
  Text[a, {b, c + 0.25}, {0, 0}, {0, 1}];
p3 = Show[g,
  AspectRatio -> 1.05,
  PlotRange -> All,
  DisplayFunction -> Identity,
  DisplayFunction -> Identity];

```

```

graph = Plot[eigengenes4,
  {x, 1, arrays - 1},
  PlotStyle -> {RGBColor[0, 0, 1], Dashing[{0.03, 0.02}]},
  DisplayFunction -> Identity];
labelx = ColumnForm[{"(e) Arrays"}, Center];
labely = ColumnForm[{" ", " "}, Center];
framex = Table[{a - 1, arraynames[[2, a]]}, {a, 1, arrays}];
framey = {-1, -0.5, 0, 0.5, 1};
coordinates = Table[{a - 1, eigengenes[[4, a]]}, {a, 1, arrays}];
points = Table[Point[coordinates[[a]]], {a, 1, arrays}];
line = Line[coordinates];
g = Show[
  {Graphics[{RGBColor[0, 0, 1], PointSize[0.022], points}],
  Graphics[{RGBColor[0, 0, 1], line}],
  graph,

  Graphics[{RGBColor[0, 0, 1], Text[" $\sqrt{\frac{2}{T}} \cos(\frac{4\pi t}{T})$ ", {8.5, 0.7}]}]},
  Frame -> True,
  FrameLabel -> {None, labely, labelx, None},
  GridLines -> {None, {{0, RGBColor[0, 0, 0]}}},
  FrameTicks -> {None, framey, framex, None},
  PlotRange -> {-1.05, 1.05},
  DisplayFunction -> Identity];
g = FullGraphics[g];
g[[1, 2]] = g[[1, 2]] /.
  Text[labely, {b_, c_}, {1., 0.}] ->
  Text[labely, {b - 5.4, c}, {0, 0}, {0, 1}];
g[[1, 2]] = g[[1, 2]] /.
  Text[labelx, {b_, c_}, {0., -1.}] ->
  Text[labelx, {b, c + 0.625}, {0, -1}, {1, 0}];
g[[1, 2]] = g[[1, 2]] /.
  Text[a_, {b_, c_}, {0., -1.}] ->
  Text[a, {b, c + 0.25}, {0, 0}, {0, 1}];
p4 = Show[g,
  AspectRatio -> 1.05,
  PlotRange -> All,
  DisplayFunction -> Identity];

```

```

graph = Plot[eigengenes5,
  {x, 1, arrays - 1},
  PlotStyle -> {RGBColor[0, 0.5, 0], Dashing[{0.03, 0.02}]},
  DisplayFunction -> Identity];
labelx = ColumnForm[{"(f) Arrays"}, Center];
labely = ColumnForm[{" ", " "}, Center];
framex = Table[{a - 1, arraynames[[2, a]]}, {a, 1, arrays}];
framey = {-1, -0.5, 0, 0.5, 1};
coordinates = Table[{a - 1, eigengenes[[5, a]]}, {a, 1, arrays}];
points = Table[Point[coordinates[[a]]], {a, 1, arrays}];
line = Line[coordinates];
g = Show[
  {Graphics[{RGBColor[0, 0.5, 0], PointSize[0.022], points}],
  Graphics[{RGBColor[0, 0.5, 0], line}],
  graph,
  Graphics[{RGBColor[0, 0.5, 0], Text[" $\sqrt{\frac{2}{T}} \cos(\frac{4\pi t}{T} + \frac{\pi}{4})$ ", {8.5, 0.7}]}]},
  Frame -> True,
  FrameLabel -> {None, labely, labelx, None},
  GridLines -> {None, {{0, RGBColor[0, 0, 0]}}},
  FrameTicks -> {None, framey, framex, None},
  PlotRange -> {-1.05, 1.05},
  DisplayFunction -> Identity];
g = FullGraphics[g];
g[[1, 2]] = g[[1, 2]] /.
  Text[labely, {b_, c_}, {1., 0.}] ->
  Text[labely, {b - 5.4, c}, {0, 0}, {0, 1}];
g[[1, 2]] = g[[1, 2]] /.
  Text[labelx, {b_, c_}, {0., -1.}] ->
  Text[labelx, {b, c + 0.625}, {0, -1}, {1, 0}];
g[[1, 2]] = g[[1, 2]] /.
  Text[a_, {b_, c_}, {0., -1.}] ->
  Text[a, {b, c + 0.25}, {0, 0}, {0, 1}];
p5 = Show[g,
  AspectRatio -> 1.05,
  PlotRange -> All,
  DisplayFunction -> Identity];

```

(\* Display Selected Eigengenes \*)

```
g3 = Show[{p2, p1},
  DisplayFunction -> Identity];
```

(\* Display Eigengenes, Fractions and Selected Eigengenes \*)

```
Show[GraphicsArray[{g1, g2, g3}],
  GraphicsSpacing -> -0.15];
```

(a) Arrays

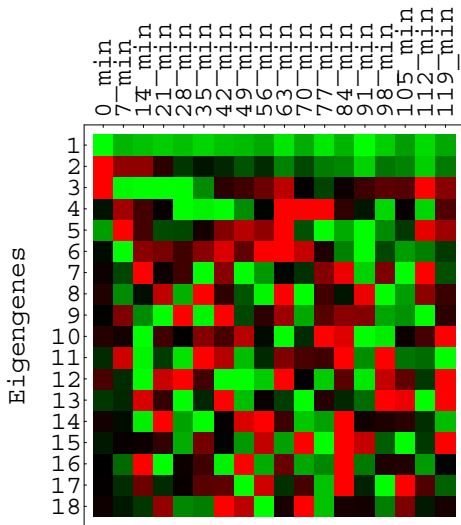

(b) Eigenexpression Fraction

$$d_1 = 0.17$$

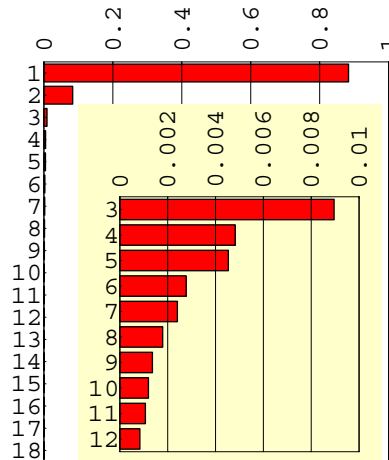

(c) Arrays

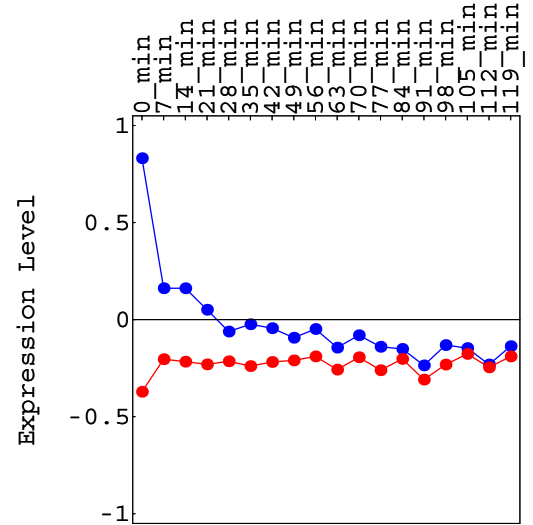

```
Show[GraphicsArray[{p3, p4, p5}],
  GraphicsSpacing -> -0.15];
```

(d) Arrays

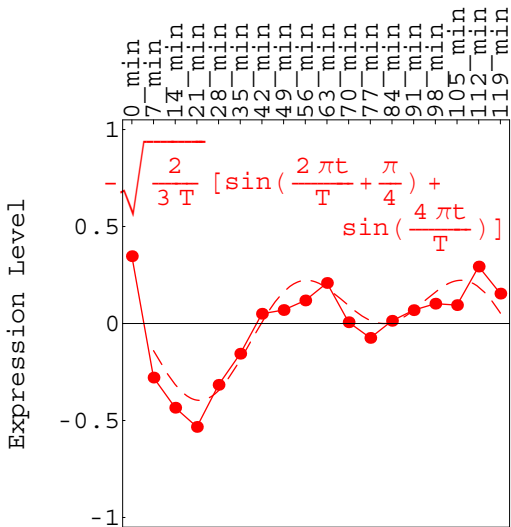

(e) Arrays

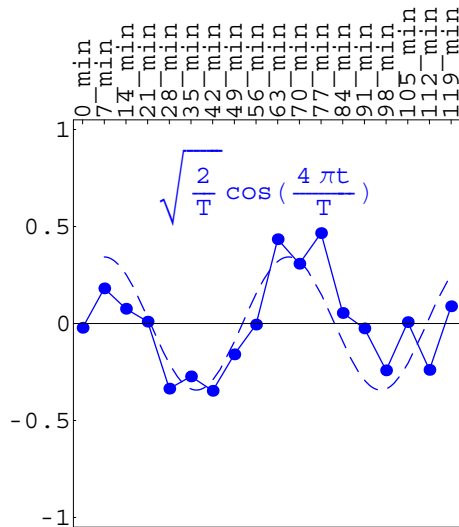

(f) Arrays

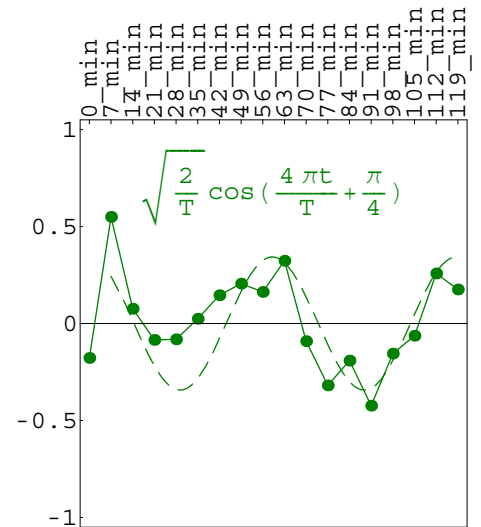

```
(* Read Human Data *)
```

```
stream = "Desktop/Networks/Data/H_GSVD.txt.nb";  
matrix = ReadList[stream, Word, RecordLists -> True, NullWords -> True];  
{genes, arrays} = Dimensions[matrix] - {2, 5}  
Clear[stream];
```

```
{12056, 18}
```

```
genenames = TakeRows [  
  TakeColumns[matrix, {1, 5}],  
  {3, genes + 2}];  
arraynames = TakeColumns [  
  TakeRows[matrix, {1, 2}],  
  {6, arrays + 5}];  
matrix = TakeColumns [  
  TakeRows[matrix, {3, genes + 2}],  
  {6, arrays + 5}];  
matrix = ToExpression[matrix];  
  
sizes = Flatten [  
  Table [  
    Dimensions [  
      Characters [  
        ToString[arraynames[[2, a]]  
        ]], {a, 1, arrays}]]];  
size = Sort[sizes, OrderedQ[{{#2, #1}}] &][[1]];  
Do [  
  Do[arraynames[[2, a]] = StringJoin[ToString[arraynames[[2, a]]], " "],  
    {b, 1, size - sizes[[a]]},  
    {a, 1, arrays}];
```

```
(* Estimate Missing Human Data Using SVD *)
```

```
(* Count Null Data *)
```

```
counter = Table[Dimensions[Position[matrix[[a]], Null]][[1]], {a, 1, genes}];
```

```
(* Locate Gene Position of Null Data *)
```

```
Clear[positions];  
positions = Table[0, {a, 1, arrays + 1}];  
Do [  
  positions[[a]] = Flatten [  
    Position[Flatten[counter], a - 1],  
    {a, 1, arrays + 1}];  
numbers = Flatten [  
  Table [  
    Dimensions[positions[[a]],  
    {a, 1, Round[arrays * 0.2]}]]];
```

```
(* Create Display Of Gene Position Of Null Data *)
```

```
framex = Table[{a, a - 1}, {a, 1, Round[arrays * 0.2]}];  
framey = {1000, 2000, 3000, 4000, 5000};  
labelx = ColumnForm[{"Number of Arrays"}, Center];  
labely = ColumnForm[{"Number of Genes"}, Center];  
g = BarChart[numbers,  
  Frame -> True,  
  Axes -> False,  
  FrameLabel -> {labelx, labely, None, None},  
  FrameTicks -> {framex, framey, None, None},  
  GridLines -> {None, None},  
  PlotRange -> {{0.5, Round[arrays * 0.2] + 0.5}, {0, 5000}},  
  DisplayFunction -> Identity];  
g = FullGraphics[g];  
g[[1, 2]] = g[[1, 2]] /.  
  Text[labely, {b_, c_}, {1., 0.}] ->  
  Text[labely, {b - 0.75, c}, {0, 0}, {0, 1}];  
g[[1, 2]] = g[[1, 2]] /.  
  Text[labelx, {b_, c_}, {0., 1.}] ->  
  Text[labelx, {b, c - 600}, {0, 1}, {1, 0}];  
g[[1, 2]] = g[[1, 2]] /.  
  Text[a_, {b_, c_}, {0., 1.}] ->  
  Text[a, {b, c - 400}, {0, 0}, {0, 1}];
```

```
(* Display Gene Position Of Null Data *)
```

```
Show[g, PlotRange -> All];
```

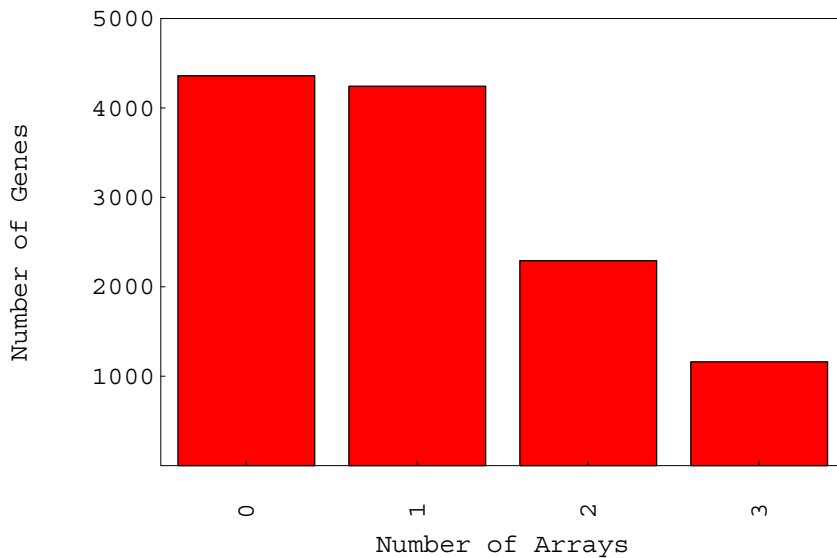

(\* Select Genes by Number of Missing Data Points \*)

```
matrix = AppendRows[Table[{counter[[a]]}, {a, 1, genes}], genenames, matrix];
matrix = Sort[matrix, OrderedQ[{#1, #2} &]];
fullgenenames = TakeColumns[
  TakeRows[matrix, {1, numbers[[1]]}],
  {2, 6}];
fullmatrix = TakeColumns[
  TakeRows[matrix, {1, numbers[[1]]}],
  {7, arrays + 6}];
missinggenenames1 = TakeColumns[
  TakeRows[matrix, {numbers[[1]] + 1, numbers[[1]] + numbers[[2]]}],
  {2, 6}];
missingmatrix1 = TakeColumns[
  TakeRows[matrix, {numbers[[1]] + 1, numbers[[1]] + numbers[[2]]}],
  {7, arrays + 6}];
missinggenenames2 = TakeColumns[
  TakeRows[matrix,
    {numbers[[1]] + numbers[[2]] + 1,
     numbers[[1]] + numbers[[2]] + numbers[[3]]}],
  {2, 6}];
missingmatrix2 = TakeColumns[
  TakeRows[matrix,
    {numbers[[1]] + numbers[[2]] + 1,
     numbers[[1]] + numbers[[2]] + numbers[[3]]}],
  {7, arrays + 6}];
missinggenenames3 = TakeColumns[
  TakeRows[matrix,
    {numbers[[1]] + numbers[[2]] + numbers[[3]] + 1,
     numbers[[1]] + numbers[[2]] + numbers[[3]] + numbers[[4]]}],
  {2, 6}];
missingmatrix3 = TakeColumns[
  TakeRows[matrix,
    {numbers[[1]] + numbers[[2]] + numbers[[3]] + 1,
     numbers[[1]] + numbers[[2]] + numbers[[3]] + numbers[[4]]}],
  {7, arrays + 6}];
```

(\* Locate Array Position of Null Data \*)

```
locator1 = Table[0, {numbers[[2]]}];
Do[
  locator1[[a]] = locator1[[a]] + Flatten[Position[missingmatrix1[[a]], Null]],
  {a, 1, numbers[[2]]}];
locator2 = Table[0, {numbers[[3]]}];
Do[
  locator2[[a]] = locator2[[a]] + Flatten[Position[missingmatrix2[[a]], Null]],
  {a, 1, numbers[[3]]}];
locator3 = Table[0, {numbers[[4]]}];
Do[
  locator3[[a]] = locator3[[a]] + Flatten[Position[missingmatrix3[[a]], Null]],
  {a, 1, numbers[[4]]}];
```

```
(* Sort Raw Data According to the Position of Missing Data Points for Each Gene *)
```

```
missingmatrix1 = AppendRows[locator1, missinggenenames1, missingmatrix1];  
missingmatrix1 = Sort[missingmatrix1, OrderedQ[{{#1, #2}} &];  
locator1 = TakeColumns[missingmatrix1, {1, 1}];  
missinggenenames1 = TakeColumns[missingmatrix1, {2, 6}];  
missingmatrix1 = TakeColumns[missingmatrix1, {7, arrays + 6}];  
missingmatrix2 = AppendRows[locator2, missinggenenames2, missingmatrix2];  
missingmatrix2 = Sort[missingmatrix2, OrderedQ[{{#1, #2}} &];  
locator2 = TakeColumns[missingmatrix2, {1, 2}];  
missinggenenames2 = TakeColumns[missingmatrix2, {3, 7}];  
missingmatrix2 = TakeColumns[missingmatrix2, {8, arrays + 7}];  
missingmatrix3 = AppendRows[locator3, missinggenenames3, missingmatrix3];  
missingmatrix3 = Sort[missingmatrix3, OrderedQ[{{#1, #2}} &];  
locator3 = TakeColumns[missingmatrix3, {1, 3}];  
missinggenenames3 = TakeColumns[missingmatrix3, {4, 8}];  
missingmatrix3 = TakeColumns[missingmatrix3, {9, arrays + 8}];
```

```
(* Examine Subset of Genes with Full Data *)
```

```
(* Calculate SVD *)
```

```
{eigenarrays, eigenexpressions, eigengenes} = SingularValues[fullmatrix];  
eigengenes[[2]] = -eigengenes[[2]];  
eigengenes[[3]] = -eigengenes[[3]];  
eigengenes[[4]] = -eigengenes[[4]];  
eigenarrays = Transpose[eigenarrays];  
fractions = eigenexpressions^2 / Sum[eigenexpressions[[a]]^2, {a, 1, arrays}];  
entropy = -N[Sum[fractions[[a]] * Log[fractions[[a]]], {a, 1, arrays}] / Log[arrays];  
entropy = N[Round[100 * entropy] / 100]
```

```
0.04
```

```
(* Create Fractions Bar Charts Displays *)
```

```
fractions[[2]]
```

```
0.00573569
```

```
limit = 0.008;
```

```
Clear[gridx, framex, framey, sizes];  
gridx = Table[a, {a, 0, limit, N[limit/4]}];  
framex = gridx;  
sizes = Flatten[  
  Table[  
    Dimensions[  
      Characters[  
        ToString[framex[[a]]  
      ]], {a, 1, 5}];  
Do[  
  Do[framex[[a]] = StringJoin[ToString[framex[[a]]], " "],  
    {b, 1, 5 - sizes[[a]]},  
    {a, 1, 5}];  
framex = Table[{gridx[[a]], framex[[a]]}, {a, 1, 5};  
gridx = Table[{gridx[[a]], RGBColor[0, 0, 0]}, {a, 1, 5};  
framey = Table[{a + 1, arrays - a - 8}, {a, 0, 10 - 2}];  
table = Table[fractions[[arrays - a]], {a, 8, arrays - 2};
```



```

g = BarChart[table,
  BarOrientation -> Horizontal,
  PlotRange -> {{0, limit * 1.0001}, {0.5, 10 - 1 + 0.5}},
  AspectRatio -> 1,
  Axes -> False,
  Frame -> True,
  FrameTicks -> {None, framey, framex, None},
  FrameLabel -> {None, None, None, None},
  GridLines -> {gridx, None},
  DisplayFunction -> Identity];
g = FullGraphics[g];
g[[1, 2]] = g[[1, 2]] /.
  Text[a_, {b_, c_}, {0., -1.}] ->
  Text[a, {b, c + 1.75}, {0, 0}, {0, 1}];
g1 = Show[g,
  AspectRatio -> 1.25,
  PlotRange -> All,
  DisplayFunction -> Identity];

gridx = Table[a, {a, 0, 1, 0.2}];
framex = gridx;
sizes = Flatten[
  Table[
    Dimensions[
      Characters[
        ToString[framex[[a]]
      ]], {a, 1, 6}]];
Do[
  Do[framex[[a]] = StringJoin[ToString[framex[[a]]], " "],
  {b, 1, size - sizes[[a]]}],
  {a, 1, 6}];
framex = Table[{gridx[[a]], framex[[a]]}, {a, 1, 6}];
gridx = Table[{gridx[[a]], RGBColor[0, 0, 0]}, {a, 1, 6}];
framey = Table[{a + 1, arrays - a}, {a, 0, arrays - 1}];
labelx = ColumnForm[
  {"(b) Eigenexpression Fraction", StringJoin["d2 = ", ToString[entropy]], " "},
  Center];
g = BarChart[
  Table[fractions[[arrays - a]], {a, 0, arrays - 1}],
  BarOrientation -> Horizontal,
  PlotRange -> {{0, 1.0001}, {0.5, arrays + 0.5}},
  AspectRatio -> 1,
  Axes -> False,
  Frame -> True,
  FrameTicks -> {None, framey, framex, None},
  FrameLabel -> {None, None, labelx, None},
  GridLines -> {gridx, None},
  DisplayFunction -> Identity];
g = FullGraphics[g];
g[[1, 2]] = g[[1, 2]] /.
  Text[labelx, {b_, c_}, {0., -1.}] ->
  Text[labelx, {b, c + 3}, {0, -1}, {1, 0}];
g[[1, 2]] = g[[1, 2]] /.
  Text[a_, {b_, c_}, {0., -1.}] ->
  Text[a, {b, c + 2.7}, {0, 0}, {0, 1}];
g2 = Show[{g,
  Graphics[{RGBColor[1, 1, 0.8], Rectangle[{0.1, 0.6}, {0.98, 16.6}]}],
  Graphics[{Rectangle[{0.1, 0.6}, {0.98, 16.6}, g1]}]},
  AspectRatio -> 1.35,
  PlotRange -> All,
  DisplayFunction -> Identity];

```

(\* Create Eigengenes 2 D Red & Green Raster Display \*)

```

contrast = 3.5;
displaying = Table[
  If[contrast * eigengenes[[i, j]] > 0,
    If[contrast * eigengenes[[i, j]] < 1, {contrast * eigengenes[[i, j]], 0}, {1, 0}],
    If[contrast * eigengenes[[i, j]] > -1, {0, -contrast * eigengenes[[i, j]]}, {0, 1}]],
  {i, 1, arrays}, {j, 1, arrays}];
framex = Table[{a - 0.5, arraynames[[2, a]]}, {a, 1, arrays}];
framey = Table[{a + 1 - 0.5, arrays - a}, {a, 0, arrays - 1}];
labely = "Eigengenes";
labelx = ColumnForm[{"(a) Arrays", " ", " "}, Center];
g = Show[
  Graphics[
    RasterArray[
      Table[
        RGBColor[displaying[[i, j, 1]], displaying[[i, j, 2]], 0],
        {i, arrays, 1, -1}, {j, 1, arrays}]]],
  AspectRatio -> 1,
  Frame -> True,
  FrameTicks -> {None, framey, framex, None},
  FrameLabel -> {None, labely, labelx, None},
  DisplayFunction -> Identity];
g = FullGraphics[g];
g[[1, 2]] = g[[1, 2]] /.
  Text[labely, {b_, c_}, {1., 0.}] ->
  Text[labely, {b - 3, c}, {0, 0}, {0, 1}];
g[[1, 2]] = g[[1, 2]] /.
  Text[labelx, {b_, c_}, {0., -1.}] ->
  Text[labelx, {b, c + 3}, {0, -1}, {1, 0}];
g[[1, 2]] = g[[1, 2]] /.
  Text[a_, {b_, c_}, {0., -1.}] ->
  Text[a, {b, c + 2.7}, {0, 0}, {0, 1}];
g1 = Show[g,
  AspectRatio -> 1.05,
  PlotRange -> All,
  DisplayFunction -> Identity];

```

(\* Create Selected Eigengenes Graph Display \*)

```

eigengenes4 = Chop[TrigFit[eigengenes[[4]], 2, {5/4 * (x - 1), arrays - 1}], 0.1]
eigengenes5 = Chop[TrigFit[eigengenes[[5]], 2, {5/4 * (x - 1), arrays - 1}], 0.175]

```

$$0.146569 \sin\left[\frac{5}{17} \pi (-1 + x)\right]$$

$$-0.228962 \cos\left[\frac{5}{17} \pi (-1 + x)\right]$$

```

eigengenes4 = Sqrt[2/17.] * Sin[5 * Pi * (x - 1) / 17];
eigengenes5 = -Sqrt[2/17.] * Cos[5 * Pi * (x - 1) / 17];

```

```

labelx = ColumnForm[{"(c) Arrays"}, Center];
labely = ColumnForm[{" ", "Expression Level"}, Center];
framex = Table[{a - 1, arraynames[[2, a]]}, {a, 1, arrays}];
framey = {-1, -0.5, 0, 0.5, 1};
coordinates = Table[{a - 1, eigengenes[[1, a]]}, {a, 1, arrays}];
points = Table[Point[coordinates[[a]]], {a, 1, arrays}];
line = Line[coordinates];
g = Show[
  {Graphics[{RGBColor[1, 0, 0], PointSize[0.022], points}},
  Graphics[{RGBColor[1, 0, 0], line}]},
  Frame -> True,
  FrameLabel -> {None, labely, labelx, None},
  GridLines -> {None, {{0, RGBColor[0, 0, 0]}}},
  FrameTicks -> {None, framey, framex, None},
  PlotRange -> {-1.05, 1.05},
  DisplayFunction -> Identity];
g = FullGraphics[g];
g[[1, 2]] = g[[1, 2]] /.
  Text[labely, {b_, c_}, {1., 0.}] ->
  Text[labely, {b - 5.4, c}, {0, 0}, {0, 1}];
g[[1, 2]] = g[[1, 2]] /.
  Text[labelx, {b_, c_}, {0., -1.}] ->
  Text[labelx, {b, c + 0.625}, {0, -1}, {1, 0}];
g[[1, 2]] = g[[1, 2]] /.
  Text[a_, {b_, c_}, {0., -1.}] ->
  Text[a, {b, c + 0.25}, {0, 0}, {0, 1}];
p1 = Show[g,
  AspectRatio -> 1.05,
  PlotRange -> All,
  DisplayFunction -> Identity];

labelx = ColumnForm[{"(d) Arrays"}, Center];
labely = ColumnForm[{" ", "Expression Level"}, Center];
framex = Table[{a - 1, arraynames[[2, a]]}, {a, 1, arrays}];
framey = {-1, -0.5, 0, 0.5, 1};
coordinates = Table[{a - 1, eigengenes[[2, a]]}, {a, 1, arrays}];
points = Table[Point[coordinates[[a]]], {a, 1, arrays}];
line = Line[coordinates];
g = Show[
  {Graphics[{RGBColor[1, 0, 0], PointSize[0.022], points}},
  Graphics[{RGBColor[1, 0, 0], line}]},
  Frame -> True,
  FrameLabel -> {None, labely, labelx, None},
  GridLines -> {None, {{0, RGBColor[0, 0, 0]}}},
  FrameTicks -> {None, framey, framex, None},
  PlotRange -> {-1.05, 1.05},
  DisplayFunction -> Identity];
g = FullGraphics[g];
g[[1, 2]] = g[[1, 2]] /.
  Text[labely, {b_, c_}, {1., 0.}] ->
  Text[labely, {b - 5.4, c}, {0, 0}, {0, 1}];
g[[1, 2]] = g[[1, 2]] /.
  Text[labelx, {b_, c_}, {0., -1.}] ->
  Text[labelx, {b, c + 0.625}, {0, -1}, {1, 0}];
g[[1, 2]] = g[[1, 2]] /.
  Text[a_, {b_, c_}, {0., -1.}] ->
  Text[a, {b, c + 0.25}, {0, 0}, {0, 1}];
p2 = Show[g,
  AspectRatio -> 1.05,
  PlotRange -> All,
  DisplayFunction -> Identity];

```

```

labelx = ColumnForm[{"(d) Arrays"}, Center];
labely = ColumnForm[{" ", "Expression Level"}, Center];
framex = Table[{a - 1, arraynames[[2, a]]}, {a, 1, arrays}];
framey = {-1, -0.5, 0, 0.5, 1};
coordinates = Table[{a - 1, eigengenes[[3, a]]}, {a, 1, arrays}];
points = Table[Point[coordinates[[a]]], {a, 1, arrays}];
line = Line[coordinates];
g = Show[
  {Graphics[{RGBColor[0, 0, 1], PointSize[0.022], points}],
   Graphics[{RGBColor[0, 0, 1], line}]},
  Frame -> True,
  FrameLabel -> {None, labely, labelx, None},
  GridLines -> {None, {{0, RGBColor[0, 0, 0]}}},
  FrameTicks -> {None, framey, framex, None},
  PlotRange -> {-1.05, 1.05},
  DisplayFunction -> Identity];
g = FullGraphics[g];
g[[1, 2]] = g[[1, 2]] /.
  Text[labely, {b_, c_}, {1., 0.}] ->
  Text[labely, {b - 5.4, c}, {0, 0}, {0, 1}];
g[[1, 2]] = g[[1, 2]] /.
  Text[labelx, {b_, c_}, {0., -1.}] ->
  Text[labelx, {b, c + 0.625}, {0, -1}, {1, 0}];
g[[1, 2]] = g[[1, 2]] /.
  Text[a_, {b_, c_}, {0., -1.}] ->
  Text[a, {b, c + 0.25}, {0, 0}, {0, 1}];
p3 = Show[g,
  AspectRatio -> 1.05,
  PlotRange -> All,
  DisplayFunction -> Identity];

```

```

graph = Plot[eigengenes4,
  {x, 0, arrays - 1},
  PlotStyle -> {RGBColor[1, 0, 0], Dashing[{0.03, 0.02}]},
  DisplayFunction -> Identity];
labelx = ColumnForm[{"(e) Arrays"}, Center];
labely = ColumnForm[{" ", " "}, Center];
framex = Table[{a - 1, arraynames[[2, a]]}, {a, 1, arrays}];
framey = {-1, -0.5, 0, 0.5, 1};
coordinates = Table[{a - 1, eigengenes[[4, a]]}, {a, 1, arrays}];
points = Table[Point[coordinates[[a]]], {a, 1, arrays}];
line = Line[coordinates];
g = Show[
  {Graphics[{RGBColor[1, 0, 0], PointSize[0.022], points}],
  Graphics[{RGBColor[1, 0, 0], line}],
  graph,

  Graphics[{RGBColor[1, 0, 0], Text[" $\sqrt{\frac{2}{T}} \sin(\frac{5 \pi t}{T})$ ", {8.5, 0.7}]}]},
  Frame -> True,
  FrameLabel -> {None, labely, labelx, None},
  GridLines -> {None, {{0, RGBColor[0, 0, 0]}}},
  FrameTicks -> {None, framey, framex, None},
  PlotRange -> {-1.05, 1.05},
  DisplayFunction -> Identity];
g = FullGraphics[g];
g[[1, 2]] = g[[1, 2]] /.
  Text[labely, {b_, c_}, {1., 0.}] ->
  Text[labely, {b - 5.4, c}, {0, 0}, {0, 1}];
g[[1, 2]] = g[[1, 2]] /.
  Text[labelx, {b_, c_}, {0., -1.}] ->
  Text[labelx, {b, c + 0.625}, {0, -1}, {1, 0}];
g[[1, 2]] = g[[1, 2]] /.
  Text[a_, {b_, c_}, {0., -1.}] ->
  Text[a, {b, c + 0.25}, {0, 0}, {0, 1}];
p4 = Show[g,
  AspectRatio -> 1.05,
  PlotRange -> All,
  DisplayFunction -> Identity];

```

```

graph = Plot[eigengenes5,
  {x, 0, arrays - 1},
  PlotStyle -> {RGBColor[0, 0, 1], Dashing[{0.03, 0.02}]},
  DisplayFunction -> Identity];
labelx = ColumnForm[{"(e) Arrays"}, Center];
labely = ColumnForm[{" ", " "}, Center];
framex = Table[{a - 1, arraynames[[2, a]]}, {a, 1, arrays}];
framey = {-1, -0.5, 0, 0.5, 1};
coordinates = Table[{a - 1, eigengenes[[5, a]]}, {a, 1, arrays}];
points = Table[Point[coordinates[[a]]], {a, 1, arrays}];
line = Line[coordinates];
g = Show[
  {Graphics[{RGBColor[0, 0, 1], PointSize[0.022], points}],
  Graphics[{RGBColor[0, 0, 1], line}],
  graph,

  Graphics[{RGBColor[0, 0, 1], Text["- $\sqrt{\frac{2}{T}} \cos(\frac{5\pi t}{T})$ ", {8.5, -0.7}]}]},
  Frame -> True,
  FrameLabel -> {None, labely, labelx, None},
  GridLines -> {None, {{0, RGBColor[0, 0, 0]}}},
  FrameTicks -> {None, framey, framex, None},
  PlotRange -> {-1.05, 1.05},
  DisplayFunction -> Identity];
g = FullGraphics[g];
g[[1, 2]] = g[[1, 2]] /.
  Text[labely, {b_, c_}, {1., 0.}] ->
  Text[labely, {b - 5.4, c}, {0, 0}, {0, 1}];
g[[1, 2]] = g[[1, 2]] /.
  Text[labelx, {b_, c_}, {0., -1.}] ->
  Text[labelx, {b, c + 0.625}, {0, -1}, {1, 0}];
g[[1, 2]] = g[[1, 2]] /.
  Text[a_, {b_, c_}, {0., -1.}] ->
  Text[a, {b, c + 0.25}, {0, 0}, {0, 1}];
p5 = Show[g,
  AspectRatio -> 1.05,
  PlotRange -> All,
  DisplayFunction -> Identity];

```

(\* Display Selected Eigengenes \*)

```
g3 = Show[{p3, p2},
  DisplayFunction -> Identity];
g4 = Show[{p5, p4},
  DisplayFunction -> Identity];
```

(\* Display Eigengenes, Fractions and Selected Eigengenes \*)

```
Show[GraphicsArray[{g1, g2, p1}],
  GraphicsSpacing -> -0.15];
```

(a) Arrays

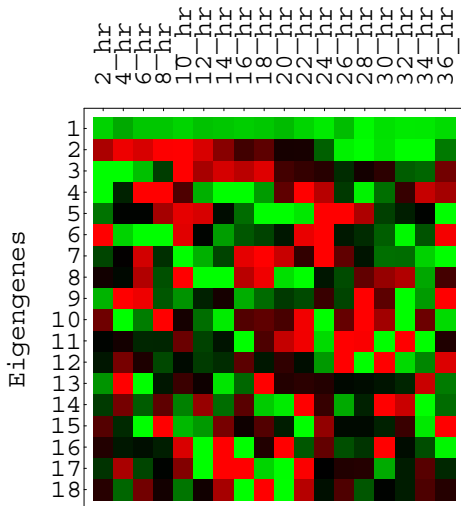

(b) Eigenexpression Fraction  
 $d_2^2 = 0.04$

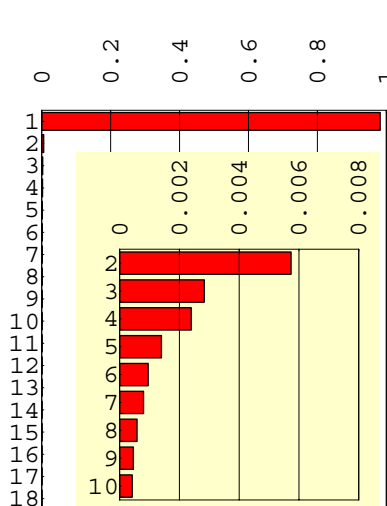

(c) Arrays

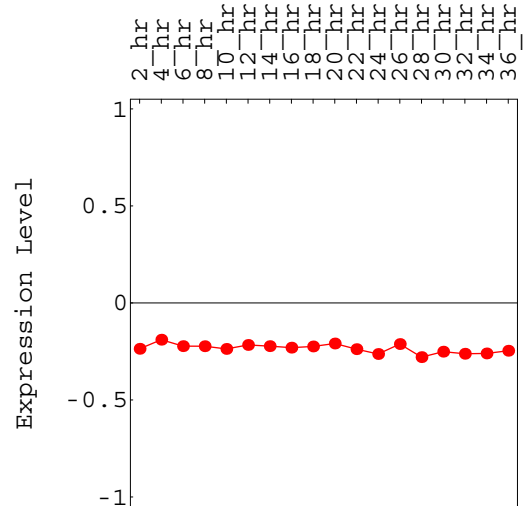

```
Show[GraphicsArray[{g3, g4}],
  GraphicsSpacing -> -0.15];
```

(d) Arrays

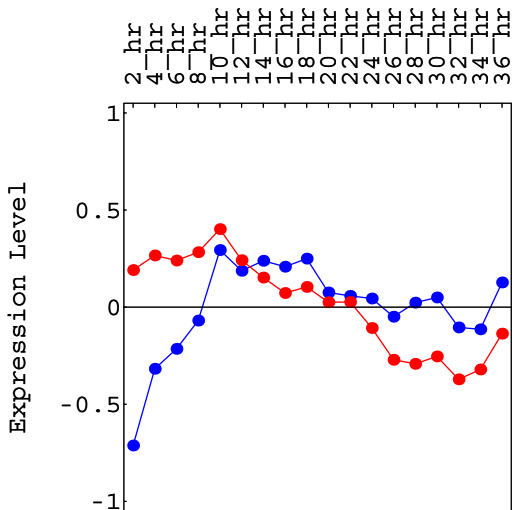

(e) Arrays

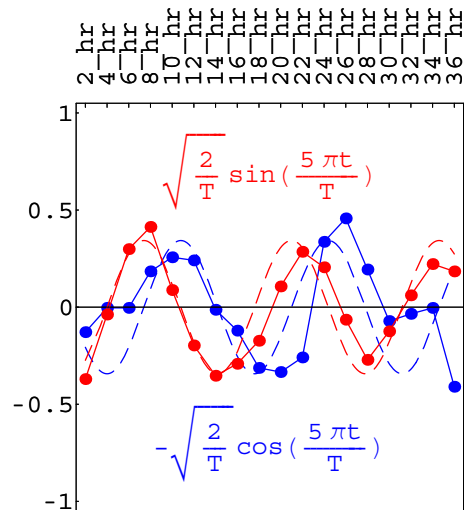

```
(* Choose Subset of Eigengenes for Estimation *)
```

```
eigengenes = TakeRows[eigengenes, {1, 5}];
```

```
(* Estimate Missing Data *)
```

```
Do[
  missingmatrix1[[a, locator1[[a, 1]]] =
    N[Round[Flatten[Dot[Dot[
      Transpose[Drop[
        Transpose[{missingmatrix1[[a]]}],
        {locator1[[a, 1]]}],
      PseudoInverse[Transpose[Drop[
        Transpose[eigengenes],
        {locator1[[a, 1]]}],
      eigengenes]][[locator1[[a, 1]]] * 100] / 100],
    {a, 1, numbers[[2]]}]
Do[Do[
  missingmatrix2[[a, locator2[[a, b]]] =
    N[Round[Flatten[Dot[Dot[
      Transpose[Drop[Drop[
        Transpose[{missingmatrix2[[a]]}],
        {locator2[[a, 2]]}, {locator2[[a, 1]]}],
      PseudoInverse[Transpose[Drop[Drop[
        Transpose[eigengenes],
        {locator2[[a, 2]]}, {locator2[[a, 1]]}],
      eigengenes]][[locator2[[a, b]]] * 100] / 100],
    {b, 1, 2}],
    {a, 1, numbers[[3]]}]
Do[Do[
  missingmatrix3[[a, locator3[[a, b]]] =
    N[Round[Flatten[Dot[Dot[
      Transpose[Drop[Drop[Drop[
        Transpose[{missingmatrix3[[a]]}],
        {locator3[[a, 3]]}, {locator3[[a, 2]]}, {locator3[[a, 1]]}],
      PseudoInverse[Transpose[Drop[Drop[Drop[
        Transpose[eigengenes],
        {locator3[[a, 3]]}, {locator3[[a, 2]]}, {locator3[[a, 1]]}],
      eigengenes]][[locator3[[a, b]]] * 100] / 100],
    {b, 1, 3}],
    {a, 1, numbers[[4]]}]
genenames = AppendColumns[
  fullgenenames,
  missinggenenames1,
  missinggenenames2,
  missinggenenames3];
matrix = AppendColumns[
  fullmatrix,
  missingmatrix1,
  missingmatrix2,
  missingmatrix3];
{genes, arrays} = Dimensions[matrix];
matrix2 = matrix;
genenames2 = genenames;
arraynames2 = arraynames;
{genes2, arrays2} = Dimensions[matrix2]
{12056, 18}
```



```
(* Examine Human Data After Missing Data Estimation *)
```

```
(* Calculate SVD *)
```

```
{eigenarrays, eigenexpressions, eigengenes} = SingularValues[matrix];  
eigengenes[[2]] = -eigengenes[[2]];  
eigengenes[[3]] = -eigengenes[[3]];  
eigengenes[[4]] = -eigengenes[[4]];  
eigenarrays = Transpose[eigenarrays];  
fractions = eigenexpressions^2 / Sum[eigenexpressions[[a]]^2, {a, 1, arrays}];  
entropy = -N[Sum[fractions[[a]] * Log[fractions[[a]]], {a, 1, arrays}] / Log[arrays];  
entropy = N[Round[100 * entropy] / 100]
```

```
0.04
```

```
(* Create Fractions Bar Charts Displays *)
```

```
fractions[[2]]  
  
0.00536708  
  
limit = 0.008;  
  
Clear[gridx, framex, framey, sizes];  
gridx = Table[a, {a, 0, limit, N[limit/4]}];  
framex = gridx;  
sizes = Flatten[  
  Table[  
    Dimensions[  
      Characters[  
        ToString[framex[[a]]  
        ]], {a, 1, 5}]]];  
Do[  
  Do[framex[[a]] = StringJoin[ToString[framex[[a]]], " "],  
    {b, 1, 5 - sizes[[a]]},  
    {a, 1, 5}];  
  framex = Table[{gridx[[a]], framex[[a]]}, {a, 1, 5};  
  gridx = Table[{gridx[[a]], RGBColor[0, 0, 0]}, {a, 1, 5};  
  framey = Table[{a + 1, arrays - a - 8}, {a, 0, 10 - 2};  
  table = Table[fractions[[arrays - a]], {a, 8, arrays - 2};  
  g = BarChart[table,  
    BarOrientation -> Horizontal,  
    PlotRange -> {{0, limit * 1.0001}, {0.5, 10 - 1 + 0.5}},  
    AspectRatio -> 1,  
    Axes -> False,  
    Frame -> True,  
    FrameTicks -> {None, framey, framex, None},  
    FrameLabel -> {None, None, None, None},  
    GridLines -> {gridx, None},  
    DisplayFunction -> Identity];  
  g = FullGraphics[g];  
  g[[1, 2]] = g[[1, 2]] /.  
    Text[a_, {b_, c_}, {0., -1.}] ->  
    Text[a, {b, c + 1.75}, {0, 0}, {0, 1}];  
  g1 = Show[g,  
    AspectRatio -> 1.25,  
    PlotRange -> All,  
    DisplayFunction -> Identity];
```

```

gridx = Table[a, {a, 0, 1, 0.2}];
framex = gridx;
sizes = Flatten[
  Table[
    Dimensions[
      Characters[
        ToString[framex[[a]]
      ]], {a, 1, 6}]];
Do[
  Do[framex[[a]] = StringJoin[ToString[framex[[a]]], " ",
    {b, 1, size - sizes[[a]]},
    {a, 1, 6}];
  framex = Table[{gridx[[a]], framex[[a]]}, {a, 1, 6}];
  gridx = Table[{gridx[[a]], RGBColor[0, 0, 0]}, {a, 1, 6}];
  framey = Table[{a + 1, arrays - a}, {a, 0, arrays - 1}];
  labelx = ColumnForm[
    {"(b) Eigenexpression Fraction", StringJoin["d2 = ", ToString[entropy]], " "},
    Center];
g = BarChart[
  Table[fractions[[arrays - a]], {a, 0, arrays - 1}],
  BarOrientation -> Horizontal,
  PlotRange -> {{0, 1.0001}, {0.5, arrays + 0.5}},
  AspectRatio -> 1,
  Axes -> False,
  Frame -> True,
  FrameTicks -> {None, framey, framex, None},
  FrameLabel -> {None, None, labelx, None},
  GridLines -> {gridx, None},
  DisplayFunction -> Identity];
g = FullGraphics[g];
g[[1, 2]] = g[[1, 2]] /.
  Text[labelx, {b_, c_}, {0., -1.}] ->
  Text[labelx, {b, c + 3}, {0, -1}, {1, 0}];
g[[1, 2]] = g[[1, 2]] /.
  Text[a_, {b_, c_}, {0., -1.}] ->
  Text[a, {b, c + 2.7}, {0, 0}, {0, 1}];
g2 = Show[{g,
  Graphics[{RGBColor[1, 1, 0.8], Rectangle[{0.1, 0.6}, {0.98, 16.6}]},
  Graphics[{Rectangle[{0.1, 0.6}, {0.98, 16.6}, g1]}]},
  AspectRatio -> 1.35,
  PlotRange -> All,
  DisplayFunction -> Identity];

```

(\* Create Eigengenes 2 D Red & Green Raster Display \*)

```

contrast = 3.5;
displaying = Table[
  If[contrast * eigengenes[[i, j]] > 0,
    If[contrast * eigengenes[[i, j]] < 1, {contrast * eigengenes[[i, j]], 0}, {1, 0}],
    If[contrast * eigengenes[[i, j]] > -1, {0, -contrast * eigengenes[[i, j]]}, {0, 1}]],
  {i, 1, arrays}, {j, 1, arrays}];
framex = Table[{a - 0.5, arraynames[[2, a]]}, {a, 1, arrays}];
framey = Table[{a + 1 - 0.5, arrays - a}, {a, 0, arrays - 1}];
labely = "Eigengenes";
labelx = ColumnForm[{"(a) Arrays", " ", " "}, Center];
g = Show[
  Graphics[
    RasterArray[
      Table[
        RGBColor[displaying[[i, j, 1]], displaying[[i, j, 2]], 0],
        {i, arrays, 1, -1}, {j, 1, arrays}]]],
  AspectRatio -> 1,
  Frame -> True,
  FrameTicks -> {None, framey, framex, None},
  FrameLabel -> {None, labely, labelx, None},
  DisplayFunction -> Identity];
g = FullGraphics[g];
g[[1, 2]] = g[[1, 2]] /.
  Text[labely, {b_, c_}, {1., 0.}] ->
  Text[labely, {b - 3, c}, {0, 0}, {0, 1}];
g[[1, 2]] = g[[1, 2]] /.
  Text[labelx, {b_, c_}, {0., -1.}] ->
  Text[labelx, {b, c + 3}, {0, -1}, {1, 0}];
g[[1, 2]] = g[[1, 2]] /.
  Text[a_, {b_, c_}, {0., -1.}] ->
  Text[a, {b, c + 2.7}, {0, 0}, {0, 1}];
g1 = Show[g,
  AspectRatio -> 1.05,
  PlotRange -> All,
  DisplayFunction -> Identity];

```

(\* Create Selected Eigengenes Graph Display \*)

```

eigengenes4 = Chop[TrigFit[eigengenes[[4]], 2, {5/4 * (x - 1), arrays - 1}], 0.1]
eigengenes5 = Chop[TrigFit[eigengenes[[5]], 2, {5/4 * (x - 1), arrays - 1}], 0.175]

```

$$0.182993 \sin\left[\frac{5}{17} \pi (-1 + x)\right]$$

$$-0.224054 \cos\left[\frac{5}{17} \pi (-1 + x)\right]$$

```

eigengenes4 = Sqrt[2/17.] * Sin[5 * Pi * (x - 1) / 17];
eigengenes5 = -Sqrt[2/17.] * Cos[5 * Pi * (x - 1) / 17];

```

```

labelx = ColumnForm[{"(c) Arrays"}, Center];
labely = ColumnForm[{" ", "Expression Level"}, Center];
framex = Table[{a - 1, arraynames[[2, a]]}, {a, 1, arrays}];
framey = {-1, -0.5, 0, 0.5, 1};
coordinates = Table[{a - 1, eigengenes[[1, a]]}, {a, 1, arrays}];
points = Table[Point[coordinates[[a]]], {a, 1, arrays}];
line = Line[coordinates];
g = Show[
  {Graphics[{RGBColor[1, 0, 0], PointSize[0.022], points}},
  Graphics[{RGBColor[1, 0, 0], line}}],
  Frame -> True,
  FrameLabel -> {None, labely, labelx, None},
  GridLines -> {None, {{0, RGBColor[0, 0, 0]}}},
  FrameTicks -> {None, framey, framex, None},
  PlotRange -> {-1.05, 1.05},
  DisplayFunction -> Identity];
g = FullGraphics[g];
g[[1, 2]] = g[[1, 2]] /.
  Text[labely, {b_, c_}, {1., 0.}] ->
  Text[labely, {b - 5.4, c}, {0, 0}, {0, 1}];
g[[1, 2]] = g[[1, 2]] /.
  Text[labelx, {b_, c_}, {0., -1.}] ->
  Text[labelx, {b, c + 0.625}, {0, -1}, {1, 0}];
g[[1, 2]] = g[[1, 2]] /.
  Text[a_, {b_, c_}, {0., -1.}] ->
  Text[a, {b, c + 0.25}, {0, 0}, {0, 1}];
p1 = Show[g,
  AspectRatio -> 1.05,
  PlotRange -> All,
  DisplayFunction -> Identity];

labelx = ColumnForm[{"(d) Arrays"}, Center];
labely = ColumnForm[{" ", "Expression Level"}, Center];
framex = Table[{a - 1, arraynames[[2, a]]}, {a, 1, arrays}];
framey = {-1, -0.5, 0, 0.5, 1};
coordinates = Table[{a - 1, eigengenes[[2, a]]}, {a, 1, arrays}];
points = Table[Point[coordinates[[a]]], {a, 1, arrays}];
line = Line[coordinates];
g = Show[
  {Graphics[{RGBColor[1, 0, 0], PointSize[0.022], points}},
  Graphics[{RGBColor[1, 0, 0], line}}],
  Frame -> True,
  FrameLabel -> {None, labely, labelx, None},
  GridLines -> {None, {{0, RGBColor[0, 0, 0]}}},
  FrameTicks -> {None, framey, framex, None},
  PlotRange -> {-1.05, 1.05},
  DisplayFunction -> Identity];
g = FullGraphics[g];
g[[1, 2]] = g[[1, 2]] /.
  Text[labely, {b_, c_}, {1., 0.}] ->
  Text[labely, {b - 5.4, c}, {0, 0}, {0, 1}];
g[[1, 2]] = g[[1, 2]] /.
  Text[labelx, {b_, c_}, {0., -1.}] ->
  Text[labelx, {b, c + 0.625}, {0, -1}, {1, 0}];
g[[1, 2]] = g[[1, 2]] /.
  Text[a_, {b_, c_}, {0., -1.}] ->
  Text[a, {b, c + 0.25}, {0, 0}, {0, 1}];
p2 = Show[g,
  AspectRatio -> 1.05,
  PlotRange -> All,
  DisplayFunction -> Identity];

```

```

labelx = ColumnForm[{"(d) Arrays"}, Center];
labely = ColumnForm[{" ", "Expression Level"}, Center];
framex = Table[{a - 1, arraynames[[2, a]]}, {a, 1, arrays}];
framey = {-1, -0.5, 0, 0.5, 1};
coordinates = Table[{a - 1, eigengenes[[3, a]]}, {a, 1, arrays}];
points = Table[Point[coordinates[[a]]], {a, 1, arrays}];
line = Line[coordinates];
g = Show[
  {Graphics[{RGBColor[0, 0, 1], PointSize[0.022], points}],
   Graphics[{RGBColor[0, 0, 1], line}]},
  Frame -> True,
  FrameLabel -> {None, labely, labelx, None},
  GridLines -> {None, {{0, RGBColor[0, 0, 0]}}},
  FrameTicks -> {None, framey, framex, None},
  PlotRange -> {-1.05, 1.05},
  DisplayFunction -> Identity];
g = FullGraphics[g];
g[[1, 2]] = g[[1, 2]] /.
  Text[labely, {b_, c_}, {1., 0.}] ->
  Text[labely, {b - 5.4, c}, {0, 0}, {0, 1}];
g[[1, 2]] = g[[1, 2]] /.
  Text[labelx, {b_, c_}, {0., -1.}] ->
  Text[labelx, {b, c + 0.625}, {0, -1}, {1, 0}];
g[[1, 2]] = g[[1, 2]] /.
  Text[a_, {b_, c_}, {0., -1.}] ->
  Text[a, {b, c + 0.25}, {0, 0}, {0, 1}];
p3 = Show[g,
  AspectRatio -> 1.05,
  PlotRange -> All,
  DisplayFunction -> Identity];

```

```

graph = Plot[eigengenes4,
  {x, 0, arrays - 1},
  PlotStyle -> {RGBColor[1, 0, 0], Dashing[{0.03, 0.02}]},
  DisplayFunction -> Identity];
labelx = ColumnForm[{"(e) Arrays"}, Center];
labely = ColumnForm[{" ", " "}, Center];
framex = Table[{a - 1, arraynames[[2, a]]}, {a, 1, arrays}];
framey = {-1, -0.5, 0, 0.5, 1};
coordinates = Table[{a - 1, eigengenes[[4, a]]}, {a, 1, arrays}];
points = Table[Point[coordinates[[a]]], {a, 1, arrays}];
line = Line[coordinates];
g = Show[
  {Graphics[{RGBColor[1, 0, 0], PointSize[0.022], points}],
  Graphics[{RGBColor[1, 0, 0], line}],
  graph,

  Graphics[{RGBColor[1, 0, 0], Text[" $\sqrt{\frac{2}{T}} \sin(\frac{5 \pi t}{T})$ ", {8.5, 0.7}]}]},
  Frame -> True,
  FrameLabel -> {None, labely, labelx, None},
  GridLines -> {None, {{0, RGBColor[0, 0, 0]}}},
  FrameTicks -> {None, framey, framex, None},
  PlotRange -> {-1.05, 1.05},
  DisplayFunction -> Identity];
g = FullGraphics[g];
g[[1, 2]] = g[[1, 2]] /.
  Text[labely, {b_, c_}, {1., 0.}] ->
  Text[labely, {b - 5.4, c}, {0, 0}, {0, 1}];
g[[1, 2]] = g[[1, 2]] /.
  Text[labelx, {b_, c_}, {0., -1.}] ->
  Text[labelx, {b, c + 0.625}, {0, -1}, {1, 0}];
g[[1, 2]] = g[[1, 2]] /.
  Text[a_, {b_, c_}, {0., -1.}] ->
  Text[a, {b, c + 0.25}, {0, 0}, {0, 1}];
p4 = Show[g,
  AspectRatio -> 1.05,
  PlotRange -> All,
  DisplayFunction -> Identity];

```

```

graph = Plot[eigengenes5,
  {x, 0, arrays - 1},
  PlotStyle -> {RGBColor[0, 0, 1], Dashing[{0.03, 0.02}]},
  DisplayFunction -> Identity];
labelx = ColumnForm[{"(e) Arrays"}, Center];
labely = ColumnForm[{" ", " "}, Center];
framex = Table[{a - 1, arraynames[[2, a]]}, {a, 1, arrays}];
framey = {-1, -0.5, 0, 0.5, 1};
coordinates = Table[{a - 1, eigengenes[[5, a]]}, {a, 1, arrays}];
points = Table[Point[coordinates[[a]]], {a, 1, arrays}];
line = Line[coordinates];
g = Show[
  {Graphics[{RGBColor[0, 0, 1], PointSize[0.022], points}},
  Graphics[{RGBColor[0, 0, 1], line}},
  graph,

  Graphics[{RGBColor[0, 0, 1], Text[" $\sqrt{\frac{2}{T}} \cos(\frac{5\pi t}{T})$ ", {8.5, -0.7}]}]},
  Frame -> True,
  FrameLabel -> {None, labely, labelx, None},
  GridLines -> {None, {{0, RGBColor[0, 0, 0]}}},
  FrameTicks -> {None, framey, framex, None},
  PlotRange -> {-1.05, 1.05},
  DisplayFunction -> Identity];
g = FullGraphics[g];
g[[1, 2]] = g[[1, 2]] /.
  Text[labely, {b_, c_}, {1., 0.}] ->
  Text[labely, {b - 5.4, c}, {0, 0}, {0, 1}];
g[[1, 2]] = g[[1, 2]] /.
  Text[labelx, {b_, c_}, {0., -1.}] ->
  Text[labelx, {b, c + 0.625}, {0, -1}, {1, 0}];
g[[1, 2]] = g[[1, 2]] /.
  Text[a_, {b_, c_}, {0., -1.}] ->
  Text[a, {b, c + 0.25}, {0, 0}, {0, 1}];
p5 = Show[g,
  AspectRatio -> 1.05,
  PlotRange -> All,
  DisplayFunction -> Identity];

```

(\* Display Selected Eigengenes \*)

```
g3 = Show[{p3, p2},
  DisplayFunction -> Identity];
g4 = Show[{p5, p4},
  DisplayFunction -> Identity];
```

(\* Display Eigengenes, Fractions and Selected Eigengenes \*)

```
Show[GraphicsArray[{g1, g2, p1}],
  GraphicsSpacing -> -0.15];
```

(a) Arrays

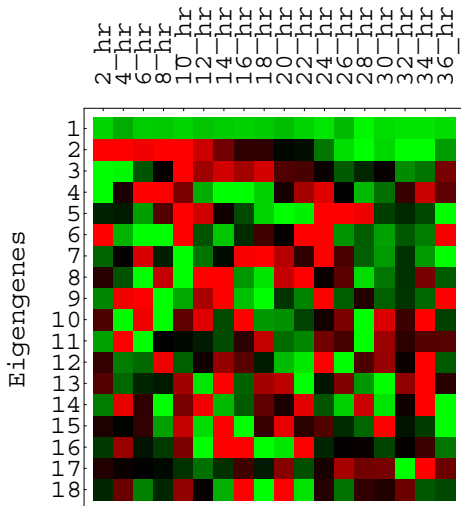

(b) Eigenexpression Fraction  
 $d_2 = 0.04$

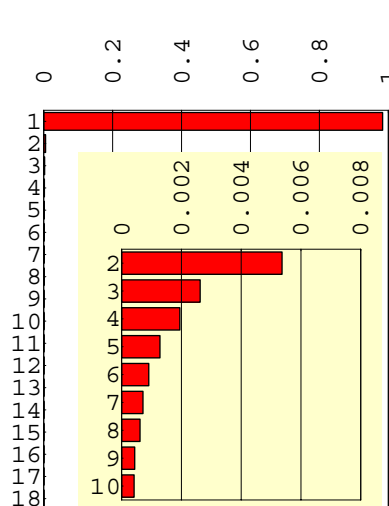

(c) Arrays

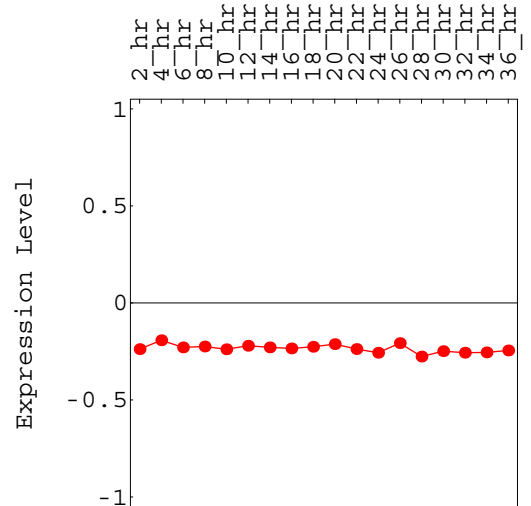

```
Show[GraphicsArray[{g3, g4}],
  GraphicsSpacing -> -0.15];
```

(d) Arrays

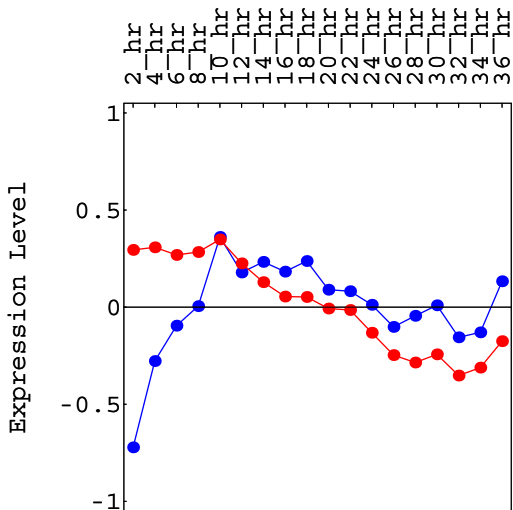

(e) Arrays

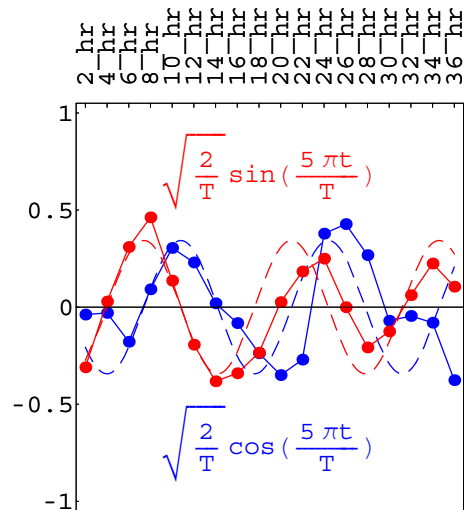



(\* Calculate GSVD of Yeast and Human Data \*)

```

matrix = AppendColumns[matrix1, matrix2];
{q, r} = QRDecomposition[matrix];
q = Conjugate[Transpose[q]];
q1 = TakeRows[q, {1, genes1}];
{u1, w1, v1} = SingularValues[q1];
genelets = Dot[v1, r];
Do[genelets[[a]] = genelets[[a]] / Sqrt[Dot[genelets[[a]], genelets[[a]]],
  {a, 1, arrays}]

genelets[[1]] = -genelets[[1]];
genelets[[2]] = -genelets[[2]];
genelets[[3]] = -genelets[[3]];
genelets[[4]] = -genelets[[4]];
genelets[[5]] = -genelets[[5]];
genelets[[6]] = -genelets[[6]];
genelets[[14]] = -genelets[[14]];
genelets[[16]] = -genelets[[16]];
genelets[[18]] = -genelets[[18]];

arraylets1 = Dot[matrix1, Inverse[genelets]];
arraylets2 = Dot[matrix2, Inverse[genelets]];
arraylets1 = Transpose[arraylets1];
Do[arraylets1[[a]] = arraylets1[[a]] / Sqrt[Dot[arraylets1[[a]], arraylets1[[a]]], {a, 1, arrays}];
arraylets1 = Transpose[arraylets1];
arraylets2 = Transpose[arraylets2];
Do[arraylets2[[a]] = arraylets2[[a]] / Sqrt[Dot[arraylets2[[a]], arraylets2[[a]]], {a, 1, arrays}];
arraylets2 = Transpose[arraylets2];
d1 = Chop[Dot[PseudoInverse[arraylets1], matrix1, Inverse[genelets]]];
d2 = Chop[Dot[PseudoInverse[arraylets2], matrix2, Inverse[genelets]]];

```

(\* Create Angular Distances Bar Charts Displays \*)

```

arraynames = Transpose[Table[{a, a}, {a, 1, arrays}]];
sizes = Flatten[
  Table[
    Dimensions[
      Characters[
        ToString[arraynames[[2, a]]
      ]
    ], {a, 1, arrays}];
size = 5;
Do[
  Do[arraynames[[2, a]] = StringJoin[ToString[arraynames[[2, a]]], " ",
    {b, 1, size - sizes[[a]]},
    {a, 1, arrays}];
distances =
  Table[N[ArcTan[d1[[a, a]] / d2[[a, a]]] / Pi], {a, 1, arrays} -
  Table[0.25, {a, 1, arrays}];

Clear[gridx, framex, framey, sizes];
gridx = {-0.25, -0.125, 0, 0.125, 0.25};
framex = {"-π/4", "-π/8", "0", "π/8", "π/4"};
framex = Table[{gridx[[a]], framex[[a]]}, {a, 1, 5}];
gridx = Table[{gridx[[a]], RGBColor[0, 0, 0]}, {a, 1, 5}];
framey = Table[{a + 1, arrays - a}, {a, 0, arrays - 1}];
labelx = ColumnForm[{"(b) Angular Distance", " ", " ", Center];

```

```

g = BarChart[
  Table[distances[[arrays - a]], {a, 0, arrays - 1}],
  BarOrientation -> Horizontal,
  BarStyle -> RGBColor[1, 0, 0],
  PlotRange -> {{-0.25 * 1.0001, 0.25 * 1.0001}, {0.5, arrays + 0.5}},
  AspectRatio -> 1,
  Axes -> False,
  Frame -> True,
  FrameTicks -> {None, framey, framex, None},
  FrameLabel -> {None, None, labelx, None},
  GridLines -> {gridx, None},
  DisplayFunction -> Identity];
g = FullGraphics[g];
g[[1, 2]] = g[[1, 2]] /.
  Text[labelx, {b_, c_}, {0., -1.}] ->
  Text[labelx, {b, c + 1.6}, {0, -1}, {1, 0}];
g[[1, 2]] = g[[1, 2]] /.
  Text[a_, {b_, c_}, {0., -1.}] ->
  Text[a, {b, c + 2}, {0, 0}, {0, 1}];
g2 = Show[g,
  AspectRatio -> 1.35,
  PlotRange -> All,
  DisplayFunction -> Identity];

```

(\* Create Genelets 2D Red & Green Raster Display \*)

```

average = Table[1, {a, 1, arrays}];
average = N[average / Sqrt[Dot[average, average]]];
centergenelets = genelets - N[Outer[Times, Dot[genelets, average], average]];

contrast = 4;
displaying = Table[
  If[contrast * centergenelets[[i, j]] > 0,
    If[contrast * centergenelets[[i, j]] < 1, {contrast * centergenelets[[i, j]], 0}, {1, 0}],
    If[contrast * centergenelets[[i, j]] > -1, {0, -contrast * centergenelets[[i, j]]}, {0, 1}]],
  {i, 1, arrays}, {j, 1, arrays}];
framex = Table[{a - 0.5, arraynames[[2, a]]}, {a, 1, arrays}];
framey = Table[{a + 1 - 0.5, arrays - a}, {a, 0, arrays - 1}];
labely = "Genelets";
labelx = ColumnForm[{"(a) Arrays", " ", " "}, Center];
g = Show[
  Graphics[
    RasterArray[
      Table[
        RGBColor[displaying[[i, j, 1]], displaying[[i, j, 2]], 0],
        {i, arrays, 1, -1}, {j, 1, arrays}]]],
  AspectRatio -> 1,
  Frame -> True,
  FrameTicks -> {None, framey, framex, None},
  FrameLabel -> {None, labely, labelx, None},
  DisplayFunction -> Identity];
g = FullGraphics[g];
g[[1, 2]] = g[[1, 2]] /.
  Text[labely, {b_, c_}, {1., 0.}] ->
  Text[labely, {b - 3, c}, {0, 0}, {0, 1}];
g[[1, 2]] = g[[1, 2]] /.
  Text[labelx, {b_, c_}, {0., -1.}] ->
  Text[labelx, {b, c + 1.6}, {0, -1}, {1, 0}];
g[[1, 2]] = g[[1, 2]] /.
  Text[a_, {b_, c_}, {0., -1.}] ->
  Text[a, {b, c + 2}, {0, 0}, {0, 1}];
g1 = Show[g,
  AspectRatio -> 1.05,
  PlotRange -> All,
  DisplayFunction -> Identity];

```

(\* Create Selected Genelets Graph Display \*)

```

labelx = ColumnForm[{"(c) Arrays"}, Center];
labely = ColumnForm[{" ", " "}, Center];
framex = Table[{a - 1, arraynames[[2, a]]}, {a, 1, arrays}];
framey = {-1, -0.5, 0, 0.5, 1};
coordinates = Table[{a - 1, genelets[[1, a]]}, {a, 1, arrays}];
points = Table[Point[coordinates[[a]]], {a, 1, arrays}];
line = Line[coordinates];
g = Show[
  {Graphics[{RGBColor[1, 0, 0], PointSize[0.022], points}},
   Graphics[{RGBColor[1, 0, 0], line}]},
  Frame -> True,
  FrameLabel -> {None, labely, labelx, None},
  GridLines -> {None, {{0, RGBColor[0, 0, 0]}}},
  FrameTicks -> {None, framey, framex, None},
  PlotRange -> {-1.05, 1.05},
  DisplayFunction -> Identity];
g = FullGraphics[g];
g[[1, 2]] = g[[1, 2]] /.
  Text[labely, {b_, c_}, {1., 0.}] ->
  Text[labely, {b - 4, c}, {0, 0}, {0, 1}];
g[[1, 2]] = g[[1, 2]] /.
  Text[labelx, {b_, c_}, {0., -1.}] ->
  Text[labelx, {b, c + 0.3}, {0, -1}, {1, 0}];
g[[1, 2]] = g[[1, 2]] /.
  Text[a_, {b_, c_}, {0., -1.}] ->
  Text[a, {b, c + 0.22}, {0, 0}, {0, 1}];
p1 = Show[g,
  AspectRatio -> 0.95,
  PlotRange -> All,
  DisplayFunction -> Identity];

labelx = ColumnForm[{"(c) Arrays"}, Center];
labely = ColumnForm[{" ", " "}, Center];
framex = Table[{a - 1, arraynames[[2, a]]}, {a, 1, arrays}];
framey = {-1, -0.5, 0, 0.5, 1};
coordinates = Table[{a - 1, genelets[[2, a]]}, {a, 1, arrays}];
points = Table[Point[coordinates[[a]]], {a, 1, arrays}];
line = Line[coordinates];
g = Show[
  {Graphics[{RGBColor[0, 0, 1], PointSize[0.022], points}},
   Graphics[{RGBColor[0, 0, 1], line}]},
  Frame -> True,
  FrameLabel -> {None, labely, labelx, None},
  GridLines -> {None, {{0, RGBColor[0, 0, 0]}}},
  FrameTicks -> {None, framey, framex, None},
  PlotRange -> {-1.05, 1.05},
  DisplayFunction -> Identity];
g = FullGraphics[g];
g[[1, 2]] = g[[1, 2]] /.
  Text[labely, {b_, c_}, {1., 0.}] ->
  Text[labely, {b - 4, c}, {0, 0}, {0, 1}];
g[[1, 2]] = g[[1, 2]] /.
  Text[labelx, {b_, c_}, {0., -1.}] ->
  Text[labelx, {b, c + 0.3}, {0, -1}, {1, 0}];
g[[1, 2]] = g[[1, 2]] /.
  Text[a_, {b_, c_}, {0., -1.}] ->
  Text[a, {b, c + 0.22}, {0, 0}, {0, 1}];
p2 = Show[g,
  AspectRatio -> 0.95,
  PlotRange -> All,
  DisplayFunction -> Identity];

```

```

genelets3 = Sqrt[2/3/17.] - Sqrt[2/3/17.] * Cos[4 * Pi * x / 17. + Pi / 3];
graph = Plot[genelets3,
  {x, 0, arrays - 1},
  PlotStyle -> {RGBColor[1, 0, 0], Dashing[{0.03, 0.02}]},
  DisplayFunction -> Identity];
labelx = ColumnForm[{"(a) Arrays"}, Center];
labeledy = ColumnForm[{"", "Expression Level"}, Center];
framex = Table[{a - 1, arraynames[[2, a]]}, {a, 1, arrays}];
framey = {-1, -0.5, 0, 0.5, 1};
coordinates = Table[{a - 1, genelets[[3, a]]}, {a, 1, arrays}];
points = Table[Point[coordinates[[a]]], {a, 1, arrays}];
line = Line[coordinates];
g = Show[
  {Graphics[{RGBColor[1, 0, 0], PointSize[0.022], points}],
  Graphics[{RGBColor[1, 0, 0], line}],
  graph,

  Graphics[{RGBColor[1, 0, 0], Text[" $\sqrt{\frac{2}{3T}} [1 - \cos(\frac{4\pi t}{T} + \frac{\pi}{3})]$ ", {9, 1}]}]},

  Frame -> True,
  FrameLabel -> {None, labeledy, labelx, None},
  GridLines -> {None, {{0, RGBColor[0, 0, 0]}}},
  FrameTicks -> {None, framey, framex, None},
  PlotRange -> {-0.85, 1.25},
  DisplayFunction -> Identity];
g = FullGraphics[g];
g[[1, 2]] = g[[1, 2]] /.
  Text[labeledy, {b_, c_}, {1., 0.}] ->
  Text[labeledy, {b - 4, c}, {0, 0}, {0, 1}];
g[[1, 2]] = g[[1, 2]] /.
  Text[labelx, {b_, c_}, {0., -1.}] ->
  Text[labelx, {b, c + 0.3}, {0, -1}, {1, 0}];
g[[1, 2]] = g[[1, 2]] /.
  Text[a_, {b_, c_}, {0., -1.}] ->
  Text[a, {b, c + 0.22}, {0, 0}, {0, 1}];
p3 = Show[g,
  AspectRatio -> 0.95,
  PlotRange -> All,
  DisplayFunction -> Identity];

```

```

genelets4 = -Sqrt[2/3/17.] + Sqrt[2/3/17.] * Cos[4 * Pi * x / 17.];
graph = Plot[genelets4,
  {x, 0, arrays - 1},
  PlotStyle -> {RGBColor[0, 0, 1], Dashing[{0.03, 0.02}]},
  DisplayFunction -> Identity];
labelx = ColumnForm[{"(a) Arrays"}, Center];
labely = ColumnForm[{" ", " "}, Center];
framex = Table[{a - 1, arraynames[[2, a]]}, {a, 1, arrays}];
framey = {-1, -0.5, 0, 0.5, 1};
coordinates = Table[{a - 1, genelets[[4, a]]}, {a, 1, arrays}];
points = Table[Point[coordinates[[a]]], {a, 1, arrays}];
line = Line[coordinates];
g = Show[
  {Graphics[{RGBColor[0, 0, 1], PointSize[0.022], points}],
  Graphics[{RGBColor[0, 0, 1], line}],
  graph,

  Graphics[{RGBColor[0, 0, 1], Text["- $\sqrt{\frac{2}{3T}} [1 - \cos(\frac{4\pi t}{T})]$ ", {9, 0.65}]}]},

  Frame -> True,
  FrameLabel -> {None, labely, labelx, None},
  GridLines -> {None, {{0, RGBColor[0, 0, 0]}}},
  FrameTicks -> {None, framey, framex, None},
  PlotRange -> {-0.85, 1.25},
  DisplayFunction -> Identity];
g = FullGraphics[g];
g[[1, 2]] = g[[1, 2]] /.
  Text[labely, {b_, c_}, {1., 0.}] ->
  Text[labely, {b - 4, c}, {0, 0}, {0, 1}];
g[[1, 2]] = g[[1, 2]] /.
  Text[labelx, {b_, c_}, {0., -1.}] ->
  Text[labelx, {b, c + 0.3}, {0, -1}, {1, 0}];
g[[1, 2]] = g[[1, 2]] /.
  Text[a_, {b_, c_}, {0., -1.}] ->
  Text[a, {b, c + 0.22}, {0, 0}, {0, 1}];
p4 = Show[g,
  AspectRatio -> 0.95,
  PlotRange -> All,
  DisplayFunction -> Identity];

```

```

genelets5 = Sqrt[2 / 17.] * Cos[4 * Pi * x / 17. - Pi / 3];
graph = Plot[genelets5,
  {x, 0, arrays - 1},
  PlotStyle -> {RGBColor[0, 0.5, 0], Dashing[{0.03, 0.02}]},
  DisplayFunction -> Identity];
labelx = ColumnForm[{"(a) Arrays"}, Center];
labeledy = ColumnForm[{" ", " "}, Center];
framex = Table[{a - 1, arraynames[[2, a]]}, {a, 1, arrays}];
framey = {-1, -0.5, 0, 0.5, 1};
coordinates = Table[{a - 1, genelets[[5, a]]}, {a, 1, arrays}];
points = Table[Point[coordinates[[a]]], {a, 1, arrays}];
line = Line[coordinates];
g = Show[
  {Graphics[{RGBColor[0, 0.5, 0], PointSize[0.022], points}],
  Graphics[{RGBColor[0, 0.5, 0], line}],
  graph,

  Graphics[{RGBColor[0, 0.5, 0], Text[" $\sqrt{\frac{2}{T}} \cos(\frac{4\pi t}{T} - \frac{\pi}{3})$ ", {11.5, -0.65}]}]},

  Frame -> True,
  FrameLabel -> {None, labeledy, labelx, None},
  GridLines -> {None, {{0, RGBColor[0, 0, 0]}}},
  FrameTicks -> {None, framex, framey, None},
  PlotRange -> {-0.85, 1.25},
  DisplayFunction -> Identity];
g = FullGraphics[g];
g[[1, 2]] = g[[1, 2]] /.
  Text[labeledy, {b_, c_}, {1., 0.}] ->
  Text[labeledy, {b - 4, c}, {0, 0}, {0, 1}];
g[[1, 2]] = g[[1, 2]] /.
  Text[labelx, {b_, c_}, {0., -1.}] ->
  Text[labelx, {b, c + 0.3}, {0, -1}, {1, 0}];
g[[1, 2]] = g[[1, 2]] /.
  Text[a_, {b_, c_}, {0., -1.}] ->
  Text[a, {b, c + 0.22}, {0, 0}, {0, 1}];
p5 = Show[g,
  AspectRatio -> 0.95,
  PlotRange -> All,
  DisplayFunction -> Identity];

```

```

labelx = ColumnForm[{"(c) Arrays"}, Center];
labely = ColumnForm[{" ", " "}, Center];
framex = Table[{a - 1, arraynames[[2, a]]}, {a, 1, arrays}];
framey = {-1, -0.5, 0, 0.5, 1};
coordinates = Table[{a - 1, genelets[[6, a]]}, {a, 1, arrays}];
points = Table[Point[coordinates[[a]]], {a, 1, arrays}];
line = Line[coordinates];
g = Show[
  {Graphics[{RGBColor[0.75, 0, 1], PointSize[0.022], points}],
   Graphics[{RGBColor[0.75, 0, 1], line}]},
  Frame -> True,
  FrameLabel -> {None, labely, labelx, None},
  GridLines -> {None, {{0, RGBColor[0, 0, 0]}}},
  FrameTicks -> {None, framey, framex, None},
  PlotRange -> {-1.05, 1.05},
  DisplayFunction -> Identity];
g = FullGraphics[g];
g[[1, 2]] = g[[1, 2]] /.
  Text[labely, {b_, c_}, {1., 0.}] ->
  Text[labely, {b - 4, c}, {0, 0}, {0, 1}];
g[[1, 2]] = g[[1, 2]] /.
  Text[labelx, {b_, c_}, {0., -1.}] ->
  Text[labelx, {b, c + 0.3}, {0, -1}, {1, 0}];
g[[1, 2]] = g[[1, 2]] /.
  Text[a_, {b_, c_}, {0., -1.}] ->
  Text[a, {b, c + 0.22}, {0, 0}, {0, 1}];
p6 = Show[g,
  AspectRatio -> 0.95,
  PlotRange -> All,
  DisplayFunction -> Identity];

```

```

genelets14 = -Sqrt[2 / 3 / 17.] + Sqrt[2 / 3 / 17.] * Cos[5 * Pi * x / 17. - Pi / 3];
graph = Plot[genelets14,
  {x, 0, arrays - 1},
  PlotStyle -> {RGBColor[1, 0, 0], Dashing[{0.03, 0.02}]},
  DisplayFunction -> Identity];
labelx = ColumnForm[{"(b) Arrays"}, Center];
labeledy = ColumnForm[{" ", " "}, Center];
framex = Table[{a - 1, arraynames[[2, a]]}, {a, 1, arrays}];
framey = {-1, -0.5, 0, 0.5, 1};
coordinates = Table[{a - 1, genelets[[14, a]]}, {a, 1, arrays}];
points = Table[Point[coordinates[[a]]], {a, 1, arrays}];
line = Line[coordinates];
g = Show[
  {Graphics[{RGBColor[1, 0, 0], PointSize[0.022], points}],
  Graphics[{RGBColor[1, 0, 0], line}],
  graph,
  Graphics[{{RGBColor[1, 0, 0], Text["-√ $\frac{2}{3T}$  [1 - cos( $\frac{5\pi t}{T} - \frac{\pi}{3}$ )]", {9, 1}]}]}],
  Frame -> True,
  FrameLabel -> {None, labeledy, labelx, None},
  GridLines -> {None, {{0, RGBColor[0, 0, 0]}}},
  FrameTicks -> {None, framex, framey, None},
  PlotRange -> {-0.85, 1.25},
  DisplayFunction -> Identity];
g = FullGraphics[g];
g[[1, 2]] = g[[1, 2]] /.
  Text[labeledy, {b_, c_}, {1., 0.}] ->
  Text[labeledy, {b - 4, c}, {0, 0}, {0, 1}];
g[[1, 2]] = g[[1, 2]] /.
  Text[labelx, {b_, c_}, {0., -1.}] ->
  Text[labelx, {b, c + 0.3}, {0, -1}, {1, 0}];
g[[1, 2]] = g[[1, 2]] /.
  Text[a_, {b_, c_}, {0., -1.}] ->
  Text[a, {b, c + 0.22}, {0, 0}, {0, 1}];
p14 = Show[g,
  AspectRatio -> 0.95,
  PlotRange -> All,
  DisplayFunction -> Identity];

```



```

genelets15 = Sqrt[2/3/17.] + Sqrt[2/3/17.] * Cos[5 * Pi * x / 17. + Pi / 3];
graph = Plot[genelets15,
  {x, 0, arrays - 1},
  PlotStyle -> {RGBColor[0, 0, 1], Dashing[{0.03, 0.02}]},
  DisplayFunction -> Identity];
labelx = ColumnForm[{"(b) Arrays"}, Center];
labeledy = ColumnForm[{" ", " "}, Center];
framex = Table[{a - 1, arraynames[[2, a]]}, {a, 1, arrays}];
framey = {-1, -0.5, 0, 0.5, 1};
coordinates = Table[{a - 1, genelets[[15, a]]}, {a, 1, arrays}];
points = Table[Point[coordinates[[a]]], {a, 1, arrays}];
line = Line[coordinates];
g = Show[
  {Graphics[{RGBColor[0, 0, 1], PointSize[0.022], points}],
  Graphics[{RGBColor[0, 0, 1], line}],
  graph,

  Graphics[{{RGBColor[0, 0, 1], Text["  $\sqrt{\frac{2}{3T}} [1 + \cos(\frac{5\pi t}{T} + \frac{\pi}{3})]$ ", {9, 0.65}]}]}],

  Frame -> True,
  FrameLabel -> {None, labeledy, labelx, None},
  GridLines -> {None, {{0, RGBColor[0, 0, 0]}}},
  FrameTicks -> {None, framex, framey, None},
  PlotRange -> {-0.85, 1.25},
  DisplayFunction -> Identity];
g = FullGraphics[g];
g[[1, 2]] = g[[1, 2]] /.
  Text[labeledy, {b_, c_}, {1., 0.}] ->
  Text[labeledy, {b - 4, c}, {0, 0}, {0, 1}];
g[[1, 2]] = g[[1, 2]] /.
  Text[labelx, {b_, c_}, {0., -1.}] ->
  Text[labelx, {b, c + 0.3}, {0, -1}, {1, 0}];
g[[1, 2]] = g[[1, 2]] /.
  Text[a_, {b_, c_}, {0., -1.}] ->
  Text[a, {b, c + 0.22}, {0, 0}, {0, 1}];
p15 = Show[g,
  AspectRatio -> 0.95,
  PlotRange -> All,
  DisplayFunction -> Identity];

```

```

genelets16 = -Sqrt[2 / 3 / 17.] - Sqrt[2 / 3 / 17.] * Cos[5 * Pi * x / 17.];
graph = Plot[genelets16,
  {x, 0, arrays - 1},
  PlotStyle -> {RGBColor[0, 0.5, 0], Dashing[{0.03, 0.02}]},
  DisplayFunction -> Identity];
labelx = ColumnForm[{"(b) Arrays"}, Center];
labeledy = ColumnForm[{" ", " "}, Center];
framex = Table[{a - 1, arraynames[[2, a]]}, {a, 1, arrays}];
framey = {-1, -0.5, 0, 0.5, 1};
coordinates = Table[{a - 1, genelets[[16, a]]}, {a, 1, arrays}];
points = Table[Point[coordinates[[a]]], {a, 1, arrays}];
line = Line[coordinates];
g = Show[
  {Graphics[{RGBColor[0, 0.5, 0], PointSize[0.022], points}],
  Graphics[{RGBColor[0, 0.5, 0], line}],
  graph,

  Graphics[{RGBColor[0, 0.5, 0], Text[" $-\sqrt{\frac{2}{3T}} [1 + \cos(\frac{5\pi t}{T})]$ ", {9, -0.65}]}]},

  Frame -> True,
  FrameLabel -> {None, labeledy, labelx, None},
  GridLines -> {None, {{0, RGBColor[0, 0, 0]}}},
  FrameTicks -> {None, framex, framey, None},
  PlotRange -> {-0.85, 1.25},
  DisplayFunction -> Identity];
g = FullGraphics[g];
g[[1, 2]] = g[[1, 2]] /.
  Text[labeledy, {b_, c_}, {1., 0.}] ->
  Text[labeledy, {b - 4, c}, {0, 0}, {0, 1}];
g[[1, 2]] = g[[1, 2]] /.
  Text[labelx, {b_, c_}, {0., -1.}] ->
  Text[labelx, {b, c + 0.3}, {0, -1}, {1, 0}];
g[[1, 2]] = g[[1, 2]] /.
  Text[a_, {b_, c_}, {0., -1.}] ->
  Text[a, {b, c + 0.22}, {0, 0}, {0, 1}];
p16 = Show[g,
  AspectRatio -> 0.95,
  PlotRange -> All,
  DisplayFunction -> Identity];

```

```

labelx = ColumnForm[{"(c) Arrays"}, Center];
labely = ColumnForm[{" ", " "}, Center];
framex = Table[{a - 1, arraynames[[2, a]]}, {a, 1, arrays}];
framey = {-1, -0.5, 0, 0.5, 1};
coordinates = Table[{a - 1, genelets[[17, a]]}, {a, 1, arrays}];
points = Table[Point[coordinates[[a]]], {a, 1, arrays}];
line = Line[coordinates];
g = Show[
  {Graphics[{RGBColor[1, 0.5, 0], PointSize[0.022], points}],
   Graphics[{RGBColor[1, 0.5, 0], line}]},
  Frame -> True,
  FrameLabel -> {None, labely, labelx, None},
  GridLines -> {None, {{0, RGBColor[0, 0, 0]}}},
  FrameTicks -> {None, framey, framex, None},
  PlotRange -> {-1.05, 1.05},
  DisplayFunction -> Identity];
g = FullGraphics[g];
g[[1, 2]] = g[[1, 2]] /.
  Text[labely, {b_, c_}, {1., 0.}] ->
  Text[labely, {b - 4, c}, {0, 0}, {0, 1}];
g[[1, 2]] = g[[1, 2]] /.
  Text[labelx, {b_, c_}, {0., -1.}] ->
  Text[labelx, {b, c + 0.3}, {0, -1}, {1, 0}];
g[[1, 2]] = g[[1, 2]] /.
  Text[a_, {b_, c_}, {0., -1.}] ->
  Text[a, {b, c + 0.22}, {0, 0}, {0, 1}];
p17 = Show[g,
  AspectRatio -> 0.95,
  PlotRange -> All,
  DisplayFunction -> Identity];

```

```

labelx = ColumnForm[{"(c) Arrays"}, Center];
labely = ColumnForm[{" ", " "}, Center];
framex = Table[{a - 1, arraynames[[2, a]]}, {a, 1, arrays}];
framey = {-1, -0.5, 0, 0.5, 1};
coordinates = Table[{a - 1, genelets[[18, a]]}, {a, 1, arrays}];
points = Table[Point[coordinates[[a]]], {a, 1, arrays}];
line = Line[coordinates];
g = Show[
  {Graphics[{RGBColor[0, 0.5, 0], PointSize[0.022], points}],
   Graphics[{RGBColor[0, 0.5, 0], line}]},
  Frame -> True,
  FrameLabel -> {None, labely, labelx, None},
  GridLines -> {None, {{0, RGBColor[0, 0, 0]}}},
  FrameTicks -> {None, framey, framex, None},
  PlotRange -> {-1.05, 1.05},
  DisplayFunction -> Identity];
g = FullGraphics[g];
g[[1, 2]] = g[[1, 2]] /.
  Text[labely, {b_, c_}, {1., 0.}] ->
  Text[labely, {b - 4, c}, {0, 0}, {0, 1}];
g[[1, 2]] = g[[1, 2]] /.
  Text[labelx, {b_, c_}, {0., -1.}] ->
  Text[labelx, {b, c + 0.3}, {0, -1}, {1, 0}];
g[[1, 2]] = g[[1, 2]] /.
  Text[a_, {b_, c_}, {0., -1.}] ->
  Text[a, {b, c + 0.22}, {0, 0}, {0, 1}];
p18 = Show[g,
  AspectRatio -> 0.95,
  PlotRange -> All,
  DisplayFunction -> Identity];

```

(\* Display Selected Genelets \*)

```
g3 = Show[{p5, p4, p3},
  DisplayFunction -> Identity];
g4 = Show[{p16, p15, p14},
  DisplayFunction -> Identity];
g5 = Show[{p18, p17, p6, p2, p1},
  DisplayFunction -> Identity];
```

(\* Display Genelets, Angular Distances and Selected Genelets \*)

```
Show[GraphicsArray[{g1, g2}],
  GraphicsSpacing -> -0.18];
```

(a) Arrays

(b) Angular Distance

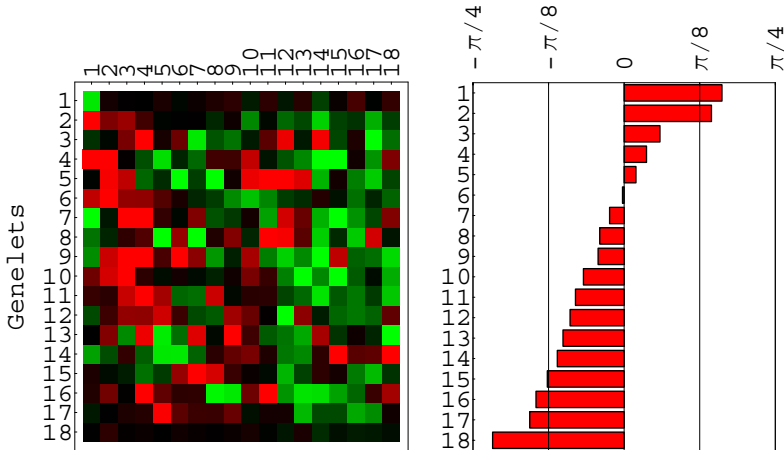

```
Show[GraphicsArray[{g3, g4, g5}],
  GraphicsSpacing -> -0.12];
```

(a) Arrays

(b) Arrays

(c) Arrays

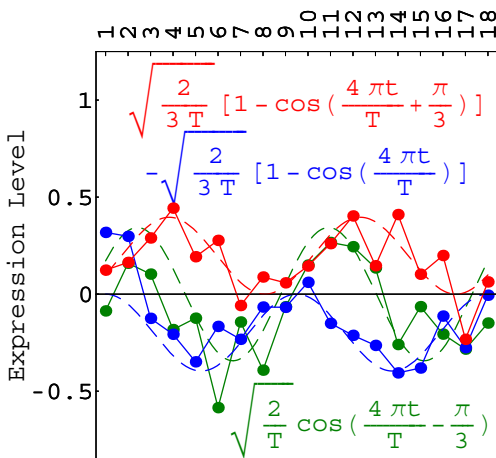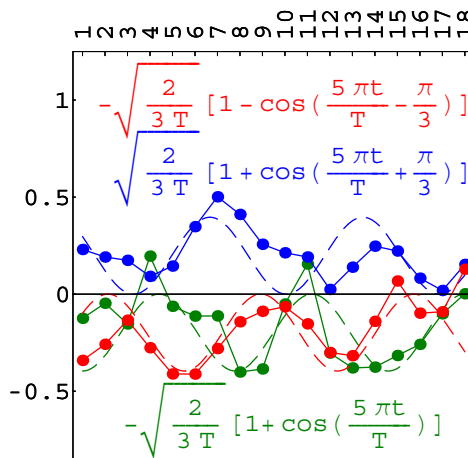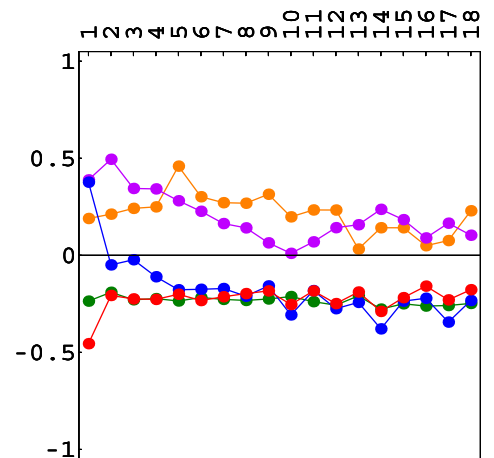

```
(* Create Yeast Generalized Fractions Bar Chart Display *)
```

```
d = Table[d1[[a, a]], {a, 1, arrays}];  
fractions = d^2 / Sum[d[[a]]^2, {a, 1, arrays}];  
coordinates = Sort[Table[{fractions[[a]], a}, {a, 1, arrays}], OrderedQ[{{#2}, {#1}}] &];  
fractions = Flatten[TakeColumns[coordinates, {1, 1}]];  
entropy = -N[Sum[fractions[[a]] * Log[fractions[[a]]], {a, 1, arrays}] / Log[arrays];  
entropy = N[Round[100 * entropy] / 100]
```

```
0.36
```

```
fractions[[3]]
```

```
0.0516352
```

```
limit = 0.052;
```

```
Clear[gridx, framex, framey, sizes];  
gridx = Table[a, {a, 0, limit, N[limit/4]}];  
framex = gridx;  
sizes = Flatten[  
  Table[  
    Dimensions[  
      Characters[  
        ToString[framex[[a]]  
      ]], {a, 1, 5}];  
size = Sort[sizes, OrderedQ[{{#2}, {#1}}] &][[1]];  
Do[  
  Do[framex[[a]] = StringJoin[ToString[framex[[a]]], " "],  
    {b, 1, 7 - sizes[[a]]},  
    {a, 1, 5};  
framex = Table[{gridx[[a]], framex[[a]]}, {a, 1, 5};  
gridx = Table[{gridx[[a]], RGBColor[0, 0, 0]}, {a, 1, 5};  
framey = Flatten[TakeColumns[coordinates, {2, 2}]];  
framey = Table[{arrays - a, framey[[a + 1]]}, {a, 2, arrays - 1}];  
table = Table[fractions[[arrays - a]], {a, 0, arrays - 3};  
g = BarChart[table,  
  BarOrientation -> Horizontal,  
  PlotRange -> {{0, limit * 1.0001}, {0.5, arrays - 2 + 0.5}},  
  AspectRatio -> 1,  
  Axes -> False,  
  Frame -> True,  
  FrameTicks -> {None, framey, framex, None},  
  FrameLabel -> {None, None, None, None},  
  GridLines -> {gridx, None},  
  DisplayFunction -> Identity];  
g = FullGraphics[g];  
g[[1, 2]] = g[[1, 2]] /.  
  Text[a_, {b_, c_}, {0., -1.}] ->  
  Text[a, {b, c + 3}, {0, 0}, {0, 1}];  
g1 = Show[g,  
  AspectRatio -> 1.25,  
  PlotRange -> All,  
  DisplayFunction -> Identity];
```

```

fractions[[1]]
0.738543

limit = 0.8;

Clear[gridx, framex, framey, sizes];
gridx = Table[a, {a, 0, limit, N[limit/5]};
framex = gridx;
sizes = Flatten[
  Table[
    Dimensions[
      Characters[
        ToString[framex[[a]]
      ]], {a, 1, 6}]]];
size = Sort[sizes, OrderedQ[{{#2, #1}} &][[1]] + 1];
Do[
  Do[framex[[a]] = StringJoin[ToString[framex[[a]]], " "],
    {b, 1, size - sizes[[a]]},
  {a, 1, 6}];
framex = Table[{gridx[[a]], framex[[a]]}, {a, 1, 6}];
framey = Flatten[TakeColumns[coordinates, {2, 2}]];
framey = Table[{arrays - a, framey[[a + 1]]}, {a, 0, arrays - 1}];
labely = "Genelets";
labelx = ColumnForm[
  {"(a) Generalized Fraction", " of Eigenexpression", StringJoin["D1 = ", ToString[entropy]], " "},
  Center];
g = BarChart[
  Table[fractions[[arrays - a]], {a, 0, arrays - 1}],
  BarOrientation -> Horizontal,
  PlotRange -> {{0, limit * 1.0001}, {0.5, arrays + 0.5}},
  AspectRatio -> 1,
  Axes -> False,
  Frame -> True,
  FrameTicks -> {None, framey, framex, None},
  FrameLabel -> {None, labely, labelx, None},
  GridLines -> {gridx, None},
  DisplayFunction -> Identity];
g = FullGraphics[g];
g[[1, 2]] = g[[1, 2]] /.
  Text[labely, {b_, c_}, {1., 0.}] ->
  Text[labely, {b - 0.16, c}, {0, 0}, {0, 1}];
g[[1, 2]] = g[[1, 2]] /.
  Text[labelx, {b_, c_}, {0., -1.}] ->
  Text[labelx, {b, c + 2}, {0, -1}, {1, 0}];
g[[1, 2]] = g[[1, 2]] /.
  Text[a_, {b_, c_}, {0., -1.}] ->
  Text[a, {b, c + 1.75}, {0, 0}, {0, 1}];
g5 = Show[{g,
  Graphics[{RGBColor[1, 1, 0.8], Rectangle[{0.1, 0.6}, {0.78, 16.5}]},
  Graphics[{Rectangle[{0.1, 0.6}, {0.78, 17}, g1]}]},
  AspectRatio -> 1.15,
  PlotRange -> All,
  DisplayFunction -> Identity];

```

(\* Create Human Generalized Fractions Bar Chart Display \*)

```
d = Table[d2[[a, a]], {a, 1, arrays}];
fractions = d^2 / Sum[d[[a]]^2, {a, 1, arrays}];
coordinates = Sort[Table[{fractions[[a]], a}, {a, 1, arrays}], OrderedQ[{{#2}, {#1}}] &];
fractions = Flatten[TakeColumns[coordinates, {1, 1}]];
entropy = -N[Sum[fractions[[a]] * Log[fractions[[a]]], {a, 1, arrays}] / Log[arrays];
entropy = N[Round[100 * entropy] / 100]
```

0.12

```
fractions[[2]]
```

0.0148912

```
limit = 0.016;
```

```
Clear[gridx, framex, framey, sizes];
gridx = Table[a, {a, 0, limit, N[limit/4]}];
framex = gridx;
sizes = Flatten[
  Table[
    Dimensions[
      Characters[
        ToString[framex[[a]]
      ]], {a, 1, 5}]]];
size = Sort[sizes, OrderedQ[{{#2}, {#1}}] &][[1]];
Do[
  Do[framex[[a]] = StringJoin[ToString[framex[[a]]], " "],
    {b, 1, 7 - sizes[[a]]}],
  {a, 1, 5}];
framex = Table[{gridx[[a]], framex[[a]]}, {a, 1, 5}];
gridx = Table[{gridx[[a]], RGBColor[0, 0, 0]}, {a, 1, 5}];
framey = Flatten[TakeColumns[coordinates, {2, 2}]];
framey = Table[{arrays - a, framey[[a + 1]]}, {a, 1, arrays - 1}];
table = Table[fractions[[arrays - a]], {a, 0, arrays - 2}];
g = BarChart[table,
  BarOrientation -> Horizontal,
  PlotRange -> {{0, limit * 1.0001}, {0.5, arrays - 1 + 0.5}},
  AspectRatio -> 1,
  Axes -> False,
  Frame -> True,
  FrameTicks -> {None, framey, framex, None},
  FrameLabel -> {None, None, None, None},
  GridLines -> {gridx, None},
  DisplayFunction -> Identity];
g = FullGraphics[g];
g[[1, 2]] = g[[1, 2]] /.
  Text[a_, {b_, c_}, {0., -1.}] ->
  Text[a, {b, c + 3}, {0, 0}, {0, 1}];
g1 = Show[g,
  AspectRatio -> 1.25,
  PlotRange -> All,
  DisplayFunction -> Identity];
```

```

fractions[[1]]

0.945012

limit = 1;

Clear[gridx, framex, framey, sizes];
gridx = Table[a, {a, 0, limit, N[limit/5]};
framex = gridx;
sizes = Flatten[
  Table[
    Dimensions[
      Characters[
        ToString[framex[[a]]
      ]], {a, 1, 6}]]];
size = Sort[sizes, OrderedQ[{{#2, #1}} &][[1]] + 2];
Do[
  Do[framex[[a]] = StringJoin[ToString[framex[[a]]], " "],
    {b, 1, size - sizes[[a]]},
  {a, 1, 6}];
framex = Table[{gridx[[a]], framex[[a]]}, {a, 1, 6}];
framey = Flatten[TakeColumns[coordinates, {2, 2}]];
framey = Table[{arrays - a, framey[[a + 1]]}, {a, 0, arrays - 1}];
labely = " ";
labelx = ColumnForm[
  {"(b) Generalized Fraction", " of Eigenexpression", StringJoin["D2 = ", ToString[entropy]], " "},
  Center];
g = BarChart[
  Table[fractions[[arrays - a]], {a, 0, arrays - 1}],
  BarOrientation -> Horizontal,
  PlotRange -> {{0, limit * 1.0001}, {0.5, arrays + 0.5}},
  AspectRatio -> 1,
  Axes -> False,
  Frame -> True,
  FrameTicks -> {None, framey, framex, None},
  FrameLabel -> {None, labely, labelx, None},
  GridLines -> {gridx, None},
  DisplayFunction -> Identity];
g = FullGraphics[g];
g[[1, 2]] = g[[1, 2]] /.
  Text[labely, {b_, c_}, {1., 0.}] ->
  Text[labely, {b - 0.16, c}, {0, 0}, {0, 1}];
g[[1, 2]] = g[[1, 2]] /.
  Text[labelx, {b_, c_}, {0., -1.}] ->
  Text[labelx, {b, c + 2}, {0, -1}, {1, 0}];
g[[1, 2]] = g[[1, 2]] /.
  Text[a_, {b_, c_}, {0., -1.}] ->
  Text[a, {b, c + 1.75}, {0, 0}, {0, 1}];
g6 = Show[{g,
  Graphics[{RGBColor[1, 1, 0.8], Rectangle[{0.1, 0.6}, {0.98, 17}]}],
  Graphics[{Rectangle[{0.1, 0.6}, {0.98, 17.5}, g1}]}],
  AspectRatio -> 1.15,
  PlotRange -> All,
  DisplayFunction -> Identity];

```



(\* Display Yeast and Human Generalized Fractions \*)

```
Show[GraphicsArray[{g5, g6}],
GraphicsSpacing -> -0.15];
```

(a) Generalized Fraction  
of Eigenexpression

$$D_1 = 0.36$$

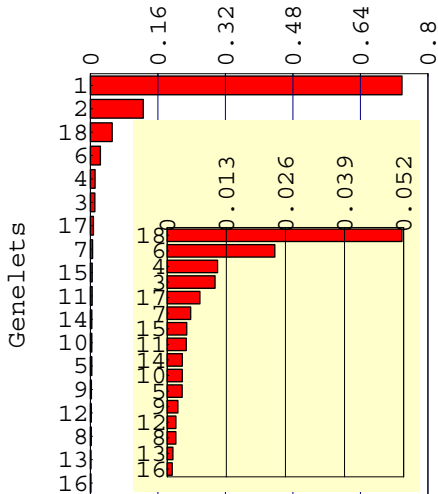

(b) Generalized Fraction  
of Eigenexpression

$$D_2 = 0.12$$

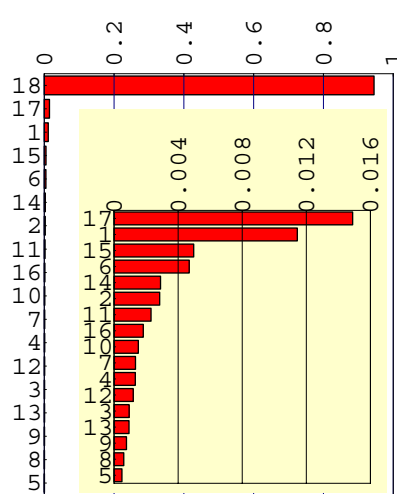

(\* GSVD Sort Yeast Data \*)

```
matrix = matrix1;
genes = genes1;
arraynames = arraynames1;
genenames = genenames1;
```

(\* GSVD Sort Yeast Arrays \*)

(\* Center Genelets and Calculate Contributions of Arraylets to Arrays \*)

```
arraycontributions3 = (genelets[[3]] - Sqrt[2/3/17.]) * d1[[3, 3]];
arraycontributions4 = (genelets[[4]] + Sqrt[2/3/17.]) * d1[[4, 4]];
arraycontributions5 = genelets[[5]] * d1[[5, 5]];
arraycontributions14 = (genelets[[14]] + Sqrt[2/3/17.]) * d1[[14, 14]];
arraycontributions15 = (genelets[[15]] - Sqrt[2/3/17.]) * d1[[15, 15]];
arraycontributions16 = (genelets[[16]] + Sqrt[2/3/17.]) * d1[[16, 16]];
```

(\* Project Arrays from 6 D Arraylets Subspace Onto 2 D Subspace \*)

```
coordinates = Table[{
  (-Sqrt[3] * (arraycontributions3[[a]] - arraycontributions15[[a]]) +
    2 * Sqrt[3] * (arraycontributions4[[a]] - arraycontributions16[[a]]) +
    (3 * arraycontributions5[[a]] + Sqrt[3] * arraycontributions14[[a]])) / 6 /
  Sqrt[(arraycontributions3[[a]] - arraycontributions15[[a]])^2 / 3 +
    (arraycontributions4[[a]] - arraycontributions16[[a]])^2 / 3 +
    (arraycontributions5[[a]] + arraycontributions14[[a]] / Sqrt[3])^2 +
    Abs[(arraycontributions3[[a]] - arraycontributions15[[a]]) / Sqrt[3] *
      (arraycontributions4[[a]] - arraycontributions16[[a]]) / Sqrt[3] +
    Abs[(arraycontributions3[[a]] - arraycontributions15[[a]]) / Sqrt[3] *
      (arraycontributions5[[a]] + arraycontributions14[[a]] / Sqrt[3])] +
    Abs[(arraycontributions4[[a]] - arraycontributions16[[a]]) / Sqrt[3] *
      (arraycontributions5[[a]] + arraycontributions14[[a]] / Sqrt[3])]],
  (3 * (arraycontributions3[[a]] - arraycontributions15[[a]]) +
    Sqrt[3] * (3 * arraycontributions5[[a]] + Sqrt[3] * arraycontributions14[[a]])) / 6 /
  Sqrt[(arraycontributions3[[a]] - arraycontributions15[[a]])^2 / 3 +
    (arraycontributions4[[a]] - arraycontributions16[[a]])^2 / 3 +
    (arraycontributions5[[a]] + arraycontributions14[[a]] / Sqrt[3])^2 +
    Abs[(arraycontributions3[[a]] - arraycontributions15[[a]]) / Sqrt[3] *
      (arraycontributions4[[a]] - arraycontributions16[[a]]) / Sqrt[3] +
    Abs[(arraycontributions3[[a]] - arraycontributions15[[a]]) / Sqrt[3] *
      (arraycontributions5[[a]] + arraycontributions14[[a]] / Sqrt[3])] +
    Abs[(arraycontributions4[[a]] - arraycontributions16[[a]]) / Sqrt[3] *
      (arraycontributions5[[a]] + arraycontributions14[[a]] / Sqrt[3])]],
  {a, 1, arrays}];
```

(\* Create Parameter Plot of Yeast Arrays Projected Onto 2 D Subspace \*)

```
points1 = {Point[coordinates[[2]], Point[coordinates[[11]]]};
points2 = {Point[coordinates[[3]], Point[coordinates[[4]]],
  Point[coordinates[[5]], Point[coordinates[[12]]],
  Point[coordinates[[13]], Point[coordinates[[14]]]};
points3 = {Point[coordinates[[6]], Point[coordinates[[15]]]};
points4 = {Point[coordinates[[7]]]};
points5 = {Point[coordinates[[1]], Point[coordinates[[8]]],
  Point[coordinates[[9]], Point[coordinates[[10]]],
  Point[coordinates[[16]], Point[coordinates[[17]]],
  Point[coordinates[[18]]]};
textcoordinates = coordinates;
Do[
  textcoordinates[[a, 1]] = If[
    textcoordinates[[a, 1]] > 0,
    textcoordinates[[a, 1]] - 0.085,
    textcoordinates[[a, 1]] + 0.095],
  {a, 1, 9}];
Do[
  textcoordinates[[a, 1]] =
  If[textcoordinates[[a, 1]] > 0,
    textcoordinates[[a, 1]] - 0.11,
    textcoordinates[[a, 1]] + 0.12],
  {a, 10, arrays}];
textcoordinates[[1]] = textcoordinates[[1]] + {0.04, -0.095};
textcoordinates[[3]] = textcoordinates[[3]] + {0.18, 0};
textcoordinates[[7]] = textcoordinates[[7]] + {0.18, 0};
textcoordinates[[8]] = textcoordinates[[8]] + {0.18, 0};
textcoordinates[[11]] = textcoordinates[[11]] + {0.12, -0.11};
textcoordinates[[12]] = textcoordinates[[12]] - {0.23, 0.06};
textcoordinates[[13]] = textcoordinates[[13]] + {0.23, 0};
textcoordinates[[15]] = textcoordinates[[15]] - {0.23, 0};
textcoordinates[[16]] = textcoordinates[[16]] - {0.02, 0.095};
textcoordinates[[17]] = textcoordinates[[17]] - {0.23, 0};
textcoordinates[[18]] = textcoordinates[[18]] + {0.11, 0.11};
```

```

texts = Table[Text[a, textcoordinates[[a]], {a, 1, arrays}];
radius = Sqrt[coordinates[[2, 1]]^2 + coordinates[[2, 2]]^2];
p = Show[
  {Graphics[{RGBColor[1, 1, 0], PointSize[0.035], points1}],
  Graphics[{RGBColor[0, 0.5, 0], PointSize[0.035], points2}],
  Graphics[{RGBColor[0, 0, 1], PointSize[0.035], points3}],
  Graphics[{RGBColor[1, 0, 0], PointSize[0.035], points4}],
  Graphics[{RGBColor[1, 0.5, 0], PointSize[0.035], points5}],
  Graphics[{RGBColor[1, 0.5, 0], Text["G2/M", {1.075, -0.52}]}],
  Graphics[{RGBColor[0, 0, 0], Text["M/G1", {0.9, 0.75}]}],
  Graphics[{RGBColor[1, 0, 0], Text["S/G2", {0.1, -1.12}]}],
  Graphics[{RGBColor[0, 0, 1], Text["S", {-0.95, -0.6}]}],
  Graphics[{RGBColor[0, 0.5, 0], Text["G1", {-0.8, 0.8}]}],
  Graphics[{RGBColor[0, 0, 0], Text["(d)", {-1.1, 1.15}]}],
  Graphics[{RGBColor[0, 0, 0], Text[" $\phi = \pi/3$ ", {0.925, 1.15}]}],
  Graphics[{RGBColor[0, 0, 0], Text[" $\phi = 0$ ", {1.12, 0.12}]}],
  Graphics[{RGBColor[0, 0, 0], Text[" $\phi = -\pi/3$ ", {0.925, -1.15}]}],
  Graphics[texts],
  Graphics[{RGBColor[0, 0, 0], Dashing[{0.03, 0.02}], Circle[{0, 0}, 0.5]}],
  Graphics[{RGBColor[0, 0, 0], Dashing[{0.03, 0.02}], Circle[{0, 0}, 1]}],
  Graphics[{RGBColor[0, 0, 0], Arrow[{-1.25 / Tan[Pi / 3.], 1.25}, {1.25 / Tan[Pi / 3.], -1.25},
    HeadCenter -> 0.5, HeadLength -> 0.035, HeadWidth -> 0.75]}],
  Graphics[{RGBColor[0, 0, 0], Arrow[{-1.25, 0}, {1.25, 0},
    HeadCenter -> 0.5, HeadLength -> 0.035, HeadWidth -> 0.75]}],
  Graphics[{RGBColor[0, 0, 0], Arrow[{-1.25 / Tan[Pi / 3.], -1.25}, {1.25 / Tan[Pi / 3.], 1.25},
    HeadCenter -> 0.5, HeadLength -> 0.035, HeadWidth -> 0.75]}],
  Graphics[{RGBColor[0, 0, 0], Circle[{0, 0}, 0.6,
    {ArcTan[coordinates[[1, 2]] / coordinates[[1, 1]], 0}]}],
  Graphics[{RGBColor[0, 0, 0], Arrow[{0.6 * Cos[-0.05], 0.6 * Sin[-0.05]}, {0.6 * Cos[0], 0.6 * Sin[0]},
    HeadCenter -> 0.5, HeadLength -> 0.035, HeadWidth -> 0.75]}],
  Graphics[{RGBColor[0, 0, 0], Arrow[{0, 0}, coordinates[[1]],
    HeadCenter -> 0.5, HeadLength -> 0.035, HeadWidth -> 0.75]}],
  Graphics[{RGBColor[0, 0, 0], Text["r", {0.5, -0.35}]}],
  Graphics[{RGBColor[0, 0, 0], Text[" $\phi$ ", {0.65, -0.15}]}],
  AspectRatio -> 1,
  PlotRange -> {{-1.25, 1.25}, {-1.25, 1.25}},
  Frame -> True,
  FrameTicks -> False,
  FrameLabel -> {None, None, None, None},
  GridLines -> {None, {{0, RGBColor[0, 0, 0]}}},
  DisplayFunction -> Identity];
p = FullGraphics[p];
p[[1, 2]] = p[[1, 2]] /.
  Text[labely, {b_, c_}, {1., 0.}] ->
  Text[labely, {-1.18, 0}, {0, 0}, {0, 1}];
s4 = Show[p,
  AspectRatio -> 1.0,
  PlotRange -> All,
  DisplayFunction -> Identity];

```

(\* GSVD Sort Yeast Genes \*)

(\* Center Arraylets and Calculate Contributions of Genelets to Genes \*)

```

centerarraylets = Transpose[arraylets1];
average = Table[1, {a, 1, genes}];
average = N[average / Sqrt[Dot[average, average]]];
centerarraylets = centerarraylets - N[Outer[Times, Dot[centerarraylets, average], average]];
centerarraylets = Transpose[centerarraylets];
genecontributions = Transpose[Dot[centerarraylets, d1]];

```

(\* Project Genes from 6 D Genelets Subspace Onto 2 D Subspace \*)

```
coordinates = Table[{
  (-Sqrt[3] * (genecontributions[[3, a]] - genecontributions[[15, a]]) +
    2 * Sqrt[3] * (genecontributions[[4, a]] - genecontributions[[16, a]]) +
    (3 * genecontributions[[5, a]] + Sqrt[3] * genecontributions[[14, a]])) / 6 /
  Sqrt[(genecontributions[[3, a]] - genecontributions[[15, a]])^2 / 3 +
    (genecontributions[[4, a]] - genecontributions[[16, a]])^2 / 3 +
    (genecontributions[[5, a]] + genecontributions[[14, a]] / Sqrt[3])^2 +
    Abs[(genecontributions[[3, a]] - genecontributions[[15, a]]) / Sqrt[3] *
      (genecontributions[[4, a]] - genecontributions[[16, a]])] / Sqrt[3] +
    Abs[(genecontributions[[3, a]] - genecontributions[[15, a]]) / Sqrt[3] *
      (genecontributions[[5, a]] + genecontributions[[14, a]] / Sqrt[3])] +
    Abs[(genecontributions[[4, a]] - genecontributions[[16, a]]) / Sqrt[3] *
      (genecontributions[[5, a]] + genecontributions[[14, a]] / Sqrt[3])]],
  (3 * (genecontributions[[3, a]] - genecontributions[[15, a]]) +
    Sqrt[3] * (3 * genecontributions[[5, a]] + Sqrt[3] * genecontributions[[14, a]])) / 6 /
  Sqrt[(genecontributions[[3, a]] - genecontributions[[15, a]])^2 / 3 +
    (genecontributions[[4, a]] - genecontributions[[16, a]])^2 / 3 +
    (genecontributions[[5, a]] + genecontributions[[14, a]] / Sqrt[3])^2 +
    Abs[(genecontributions[[3, a]] - genecontributions[[15, a]]) / Sqrt[3] *
      (genecontributions[[4, a]] - genecontributions[[16, a]])] / Sqrt[3] +
    Abs[(genecontributions[[3, a]] - genecontributions[[15, a]]) / Sqrt[3] *
      (genecontributions[[5, a]] + genecontributions[[14, a]] / Sqrt[3])] +
    Abs[(genecontributions[[4, a]] - genecontributions[[16, a]]) / Sqrt[3] *
      (genecontributions[[5, a]] + genecontributions[[14, a]] / Sqrt[3])]],
  {a, 1, genes}];
```

(\* Create Parameter Plot of Cell Cycle Genes Projected Onto 2 D Subspace \*)

```
stream = "Desktop/Networks/Data/Y_Classify.txt.nb";
list = ReadList[stream, Word, RecordLists -> True, NullWords -> True];
list = Drop[list, 1];
Clear[stream];
stages = {"M/G1", "G1", "S", "S/G2", "G2/M"};
points = {points1, points2, points3, points4, points5};
radii = {radii1, radii2, radii3, radii4, radii5};
Do[{
  position = Position[list, stages[[b]]],
  table = Table[list[[position[[a, 1]], 1]], {a, 1, Dimensions[position][[1]]},
  position = Table[Position[genenames, table[[a]]], {a, 1, Dimensions[table][[1]]},
  table = Flatten[Position[position, {}]],
  Do[
    position = Drop[position, {table[[a]], table[[a]]}],
    {a, Dimensions[table][[1]], 1, -1}],
  points[[b]] = Table[Point[coordinates[[position[[a, 1], 1]]], {a, 1, Dimensions[position][[1]]},
  radii[[b]] = Table[
    Sqrt[coordinates[[position[[a, 1], 1]]^2 + coordinates[[position[[a, 1], 2]]^2],
    {a, 1, Dimensions[position][[1]]}],
  {b, 1, Dimensions[stages][[1]]}]
```

```
Dimensions[points[[1]]][[1]]
Dimensions[points[[2]]][[1]]
Dimensions[points[[3]]][[1]]
Dimensions[points[[4]]][[1]]
Dimensions[points[[5]]][[1]]
```

81

238

54

95

144

```
radii = Sort[Flatten[radii], OrderedQ[{{#1}, {#2}}] &];
N[Round[radii[[60]] * 100] / 100]
N[Round[radii[[61]] * 100] / 100]
```

0.49

0.5

(\* 612 cell cycle genes, 81 in M/G1, 238 in G1, 54 in S, 95 in S/G2, 144 in G2/M. \*)

(\* For 552 genes, 50% or more of the contributions of the 6 genelets add up. \*)

```

p = Show[
  {Graphics[{RGBColor[1, 0.5, 0], PointSize[0.02], points[[5]]}],
  Graphics[{RGBColor[1, 1, 0], PointSize[0.02], points[[1]]}],
  Graphics[{RGBColor[1, 0, 0], PointSize[0.02], points[[4]]}],
  Graphics[{RGBColor[0, 0.5, 0], PointSize[0.02], points[[2]]}],
  Graphics[{RGBColor[0, 0, 1], PointSize[0.02], points[[3]]}],
  Graphics[{RGBColor[1, 0.5, 0], Text["G2/M", {1.075, -0.52}]}],
  Graphics[{RGBColor[0, 0, 0], Text["M/G1", {0.9, 0.75}]}],
  Graphics[{RGBColor[1, 0, 0], Text["S/G2", {0.1, -1.12}]}],
  Graphics[{RGBColor[0, 0, 1], Text["S", {-0.95, -0.6}]}],
  Graphics[{RGBColor[0, 0.5, 0], Text["G1", {-0.8, 0.8}]}],
  Graphics[{RGBColor[0, 0, 0], Text["(e)", {-1.1, 1.15}]}],
  Graphics[{RGBColor[0, 0, 0], Text[" $\phi=\pi/3$ ", {0.925, 1.15}]}],
  Graphics[{RGBColor[0, 0, 0], Text[" $\phi=0$ ", {1.12, 0.12}]}],
  Graphics[{RGBColor[0, 0, 0], Text[" $\phi=-\pi/3$ ", {0.925, -1.15}]}],
  Graphics[{RGBColor[0, 0, 0], Dashing[{0.03, 0.02}], Circle[{0, 0}, 0.5]}],
  Graphics[{RGBColor[0, 0, 0], Dashing[{0.03, 0.02}], Circle[{0, 0}, 1]}],
  Graphics[{RGBColor[0, 0, 0], Arrow[{-1.25 / Tan[Pi / 3.], 1.25}, {1.25 / Tan[Pi / 3.], -1.25},
    HeadCenter -> 0.5, HeadLength -> 0.035, HeadWidth -> 0.75]}],
  Graphics[{RGBColor[0, 0, 0], Arrow[{-1.25, 0}, {1.25, 0},
    HeadCenter -> 0.5, HeadLength -> 0.035, HeadWidth -> 0.75]}],
  Graphics[{RGBColor[0, 0, 0], Arrow[{-1.25 / Tan[Pi / 3.], -1.25}, {1.25 / Tan[Pi / 3.], 1.25},
    HeadCenter -> 0.5, HeadLength -> 0.035, HeadWidth -> 0.75]}],
  AspectRatio -> 1,
  PlotRange -> {{-1.25, 1.25}, {-1.25, 1.25}},
  Frame -> True,
  FrameTicks -> False,
  FrameLabel -> {None, None, None, None},
  GridLines -> {None, None},
  DisplayFunction -> Identity];
p = FullGraphics[p];
p[[1, 2]] = p[[1, 2]] /.
  Text[label_, {b_, c_}, {1., 0.}] ->
  Text[label_, {-1.18, 0}, {0, 0}, {0, 1}];
s5 = Show[p,
  AspectRatio -> 1.0,
  PlotRange -> All,
  DisplayFunction -> Identity];

```

(\* Create Plot of GSVD Cell Cycle 2 D Subspace \*)

```

R[theta_] = {{Cos[theta], Sin[theta]}, {-Sin[theta], Cos[theta]}};
x = Transpose[{{0.4, 0}, {1.1, 0}, {0.75, 0.25}}];
polypoints[theta_] = Transpose[Dot[R[theta], x]];
p = Show[
  {Graphics[{RGBColor[1, 0.5, 0], Text["G2/M", {1.075, -0.52}]}],
  Graphics[{RGBColor[0, 0, 0], Text["M/G1", {0.9, 0.75}]}],
  Graphics[{RGBColor[1, 0, 0], Text["S/G2", {0.1, -1.12}]}],
  Graphics[{RGBColor[0, 0, 1], Text["S", {-0.95, -0.6}]}],
  Graphics[{RGBColor[0, 0.5, 0], Text["G1", {-0.8, 0.8}]}],
  Graphics[{RGBColor[0, 0, 0], Text["(f)", {-1.1, 1.15}]}],
  Graphics[{RGBColor[0, 0, 0], Text[" $\phi=\pi/3$ ", {0.925, 1.15}]}],
  Graphics[{RGBColor[0, 0, 0], Text[" $\phi=0$ ", {1.12, 0.12}]}],
  Graphics[{RGBColor[0, 0, 0], Text[" $\phi=-\pi/3$ ", {0.925, -1.15}]}],
  Graphics[{RGBColor[1, 0.5, 0], Disk[{0, 0}, 1, {-Pi/3, 0}]}],
  Graphics[{RGBColor[1, 1, 0], Disk[{0, 0}, 1, {0, Pi/2}]}],
  Graphics[{RGBColor[0, 0.5, 0], Disk[{0, 0}, 1, {Pi/2, Pi}]}],
  Graphics[{RGBColor[0, 0, 1], Disk[{0, 0}, 1, {Pi, 4*Pi/3}]}],
  Graphics[{RGBColor[1, 0, 0], Disk[{0, 0}, 1, {4*Pi/3, 5*Pi/3}]}],
  Graphics[{RGBColor[1, 1, 1], Disk[{0, 0}, 0.5]}],
  Graphics[{RGBColor[1, 0.5, 0], Polygon[polypoints[0]}],
  Graphics[{RGBColor[0, 0.5, 0], Polygon[polypoints[Pi]}],
  Graphics[{RGBColor[0, 0, 1], Polygon[polypoints[2*Pi/3]}],
  Graphics[{RGBColor[1, 0, 0], Polygon[polypoints[Pi/3]}],
  Graphics[{RGBColor[0, 0, 0], Arrow[{-1.25/Tan[Pi/3.], 1.25}, {1.25/Tan[Pi/3.], -1.25},
    HeadCenter -> 0.5, HeadLength -> 0.035, HeadWidth -> 0.75]}],
  Graphics[{RGBColor[0, 0, 0], Arrow[{-1.25, 0}, {1.25, 0},
    HeadCenter -> 0.5, HeadLength -> 0.035, HeadWidth -> 0.75]}],
  Graphics[{RGBColor[0, 0, 0], Arrow[{-1.25/Tan[Pi/3.], -1.25}, {1.25/Tan[Pi/3.], 1.25},
    HeadCenter -> 0.5, HeadLength -> 0.035, HeadWidth -> 0.75]}],
  AspectRatio -> 1,
  PlotRange -> {{-1.25, 1.25}, {-1.25, 1.25}},
  Frame -> True,
  FrameTicks -> False,
  FrameLabel -> {None, None, None, None},
  GridLines -> {None, {{0, RGBColor[0, 0, 0]}}},
  DisplayFunction -> Identity];
p = FullGraphics[p];
p[[1, 2]] = p[[1, 2]] /.
  Text[labely, {b_, c_}, {1., 0.}] ->
  Text[labely, {-1.18, 0}, {0, 0}, {0, 1}];
s6 = Show[p,
  AspectRatio -> 1.0,
  PlotRange -> All,
  DisplayFunction -> Identity];
Clear[x];

```

(\* Define the Initial Phase \*)

```
zerophase = Pi/2;
```

(\* Sort Yeast Genes by GSVD Phase \*)

```
gsvdphase = Table[{
  coordinates[[a, 1]] / Sqrt[coordinates[[a, 1]]^2 + coordinates[[a, 2]]^2],
  coordinates[[a, 2]] / Sqrt[coordinates[[a, 1]]^2 + coordinates[[a, 2]]^2]},
{a, 1, genes}];
gsvdphase = Table[{
  -gsvdphase[[a, 1]] * Cos[zerophase] - gsvdphase[[a, 2]] * Sin[zerophase],
  -gsvdphase[[a, 2]] * Cos[zerophase] + gsvdphase[[a, 1]] * Sin[zerophase]},
{a, 1, genes}];
gsvdphase = Table[{
  gsvdphase[[a, 1]],
  gsvdphase[[a, 2]],
  N[ArcTan[gsvdphase[[a, 1]] / gsvdphase[[a, 2]]] / Pi]},
{a, 1, genes}];
sortmatrix = AppendRows[gsvdphase, genenames, matrix, arraylets1];
sortmatrix = Sort[sortmatrix, OrderedQ[{{#1}, {#2}}] &];
negative1 = 2112;
positive1 = 2113;
sortmatrix[[negative1, 1]]
sortmatrix[[positive1, 1]]
```

-0.0007522

0.000147134

```
sortmatrix = Transpose[Drop[Transpose[sortmatrix], {1}]];
sortmatrix = AppendColumns[
  Sort[
    TakeRows[sortmatrix, {1, negative1}],
    OrderedQ[{{#2}, {#1}}] &],
  Sort[
    TakeRows[sortmatrix, {positive1, genes}],
    OrderedQ[{{#1}, {#2}}] &];
phases = TakeColumns[sortmatrix, {2, 2}];
gsvdphases = phases;
sortmatrix = Transpose[Drop[Transpose[sortmatrix], {1, 2}]]];
```

(\* Reconstruct Yeast Data With Sorted Genes \*)

```
genenames1 = TakeColumns[sortmatrix, {1, 6}];
matrix1 = TakeColumns[sortmatrix, {7, arrays + 6}];
arraylets1 = TakeColumns[sortmatrix, {arrays + 7, 2 * arrays + 6}];
```



(\* Classify Yeast Gene Phases into Yeast Cell Cycle Phases \*)

```
ph1 = 0;  
ph2 = -1 / 2.;  
ph3 = -1.;  
ph4 = -4 / 3.;  
ph5 = -5 / 3.;
```

```
endph5 = genes;  
beginph1 = 1;  
phases[[endph5]] - ph1  
phases[[beginph1]] - ph1
```

```
{0.0000468343}
```

```
{-0.000239433}
```

```
endph1 = 1107;  
beginph2 = 1108;  
phases[[endph1]] - ph2  
phases[[beginph2]] - ph2
```

```
{0.00152245}
```

```
{0.999794}
```

```
endph2 = 2112;  
beginph3 = 2113;  
phases[[endph2]] - ph3  
phases[[beginph3]] - ph3
```

```
{1.0003}
```

```
{0.999906}
```

```
endph3 = 2816;  
beginph4 = 2817;  
phases[[endph3]] - ph4  
phases[[beginph4]] - ph4
```

```
{1.0009}
```

```
{0.99987}
```

```
endph4 = 3827;  
beginph5 = 3828;  
phases[[endph4]] - ph5  
phases[[beginph5]] - ph5
```

```
{2.00019}
```

```
{1.99935}
```

(\* 4523 yeast genes, 1107 in M/G1, 1005 in G1, 704 in S, 1011 in S/G2, 696 in G2/M. \*)

```
(* Display GSVD Sorted and Reconstructed Yeast Data *)
```

```
genes = genes1;  
genenames = genenames1;  
arraynames = arraynames1;
```

```
(* Reconstruct Sorted Yeast Data *)
```

```
Do[d1[[a, a]] = 0, {a, 1, 2}];  
Do[d1[[a, a]] = 0, {a, 6, 13}];  
Do[d1[[a, a]] = 0, {a, 17, 18}];  
matrix = Dot[arraylets1, d1, genelets];
```

```
(* Center Reconstructed Sorted Yeast Data *)
```

```
average = Table[1, {a, 1, arrays}];  
average = N[average / Sqrt[Dot[average, average]]];  
matrix = matrix - N[Outer[Times, Dot[matrix, average], average]];  
matrix = Transpose[matrix];  
average = Table[1, {a, 1, genes}];  
average = N[average / Sqrt[Dot[average, average]]];  
matrix = matrix - N[Outer[Times, Dot[matrix, average], average]];  
matrix = Transpose[matrix];
```

```
(* Create Reconstructed Sorted Yeast Data 2D Red & Green Raster Display *)
```

```
contrast = 10 * 1.5;  
displaying = Table[  
  If[contrast * matrix[[i, j]] > 0,  
    If[contrast * matrix[[i, j]] < 1, {contrast * matrix[[i, j]], 0}, {1, 0}],  
    If[contrast * matrix[[i, j]] > -1, {0, -contrast * matrix[[i, j]]}, {0, 1}]],  
  {i, 1, genes}, {j, 1, arrays}];  
framex = Table[{a - 0.5, arraynames[[2, a]]}, {a, 1, arrays}];  
framey = {  
  {genes - endph1 / 2, "M/G1"},  
  {genes - (endph1 + endph2) / 2, "G1"},  
  {genes - (endph2 + endph3) / 2, "S"},  
  {genes - (endph3 + endph4) / 2, "S/G2"},  
  {(genes - endph4) / 2, "G2/M"}];  
gridy = {  
  {genes - endph1 + 0.5, {RGBColor[0, 0, 0]}},  
  {genes - endph2 + 0.5, {RGBColor[0, 0, 0]}},  
  {genes - endph3 + 0.5, {RGBColor[0, 0, 0]}},  
  {genes - endph4 + 0.5, {RGBColor[0, 0, 0]}}];  
labelx = "(a) Arrays";  
labely = ColumnForm[{" ", "Genes", " ", " ", " ", " ", " ", " ", " "}, Center];  
g = Show[  
  Graphics[  
    RasterArray[  
      Table[  
        RGBColor[displaying[[i, j, 1]], displaying[[i, j, 2]], 0],  
        {i, genes, 1, -1}, {j, 1, arrays}]]],  
  AspectRatio -> 1,  
  Frame -> True,  
  FrameTicks -> {None, framey, framex, None},  
  FrameLabel -> {None, labely, labelx, None},  
  GridLines -> {None, gridy},  
  DisplayFunction -> Identity];
```

```

g = FullGraphics[g];
g[[1, 2]] = g[[1, 2]] /.
  Text[labely, {b_, c_}, {1., 0.}] →
  Text[labely, {b, c}, {0, 0}, {0, 1}];
g[[1, 2]] = g[[1, 2]] /.
  Text[a_, {b_, c_}, {1., 0.}] →
  Text[a, {b - 1.5, c}, {0, 0}, {0, 1}];
g[[1, 2]] = g[[1, 2]] /.
  Text[labelx, {b_, c_}, {0., -1.}] →
  Text[labelx, {b, c + 1100}, {0, -1}, {1, 0}];
g[[1, 2]] = g[[1, 2]] /.
  Text[a_, {b_, c_}, {0., -1.}] →
  Text[a, {b, c + 550}, {0, 0}, {0, 1}];
g1 = Show[g,
  AspectRatio -> GoldenRatio * 1.2,
  PlotRange -> All,
  DisplayFunction -> Identity];

(* Center Sorted Yeast Arraylets *)

arraylets = Transpose[arraylets1];
average = Table[1, {a, 1, genes}];
average = N[average / Sqrt[Dot[average, average]]];
arraylets = arraylets - N[Outer[Times, Dot[arraylets, average], average]];
arraylets = Transpose[arraylets];

(* Create Sorted Yeast Arraylets 2 D Red & Green Raster Display *)

contrast = 75 * 1.5;
displaying = Table[
  If[contrast * arraylets[[i, j]] > 0,
    If[contrast * arraylets[[i, j]] < 1, {contrast * arraylets[[i, j]], 0}, {1, 0}],
    If[contrast * arraylets[[i, j]] > -1, {0, -contrast * arraylets[[i, j]]}, {0, 1}]],
  {i, 1, genes}, {j, 1, arrays}];
labelx = "(b) Arraylets";
labely = ColumnForm[{" ", " ", " ", " ", " ", " ", " ", " ", " ", " "}, Center];
framey = {
  {genes - endph5 / 2, " ", 0},
  {genes - (endph5 + endph1) / 2, " ", 0},
  {genes - (endph1 + endph2) / 2, " ", 0},
  {genes - (endph2 + endph3) / 2, " ", 0},
  {genes - (endph3 + endph4) / 2, " ", 0},
  {(genes - endph4) / 2, " ", 0}};
gridy = {
  {genes - endph1 + 0.5, {RGBColor[0, 0, 0]}},
  {genes - endph2 + 0.5, {RGBColor[0, 0, 0]}},
  {genes - endph3 + 0.5, {RGBColor[0, 0, 0]}},
  {genes - endph4 + 0.5, {RGBColor[0, 0, 0]}},
  {genes - endph5 + 0.5, {RGBColor[0, 0, 0]}}};
framex = Table[{a - 0.5, ToString[a]}, {a, 1, arrays}];
size = 7;
sizes = Flatten[
  Table[
    Dimensions[
      Characters[
        framex[[a, 2]]
      ]], {a, 1, arrays}]];
Do[
  Do[framex[[a, 2]] = StringJoin[framex[[a, 2]], " "],
  {b, 1, size - sizes[[a]]},
  {a, 1, arrays}];

```

```

g = Show[
  Graphics[
    RasterArray[
      Table[
        RGBColor[displaying[[i, j, 1]], displaying[[i, j, 2]], 0],
        {i, genes, 1, -1}, {j, 1, arrays}
      ]],
    AspectRatio -> 1,
    Frame -> True,
    FrameTicks -> {None, framey, framex, None},
    FrameLabel -> {None, labely, labelx, None},
    GridLines -> {None, gridy},
    DisplayFunction -> Identity];
g = FullGraphics[g];
g[[1, 2]] = g[[1, 2]] /.
  Text[labely, {b_, c_}, {1., 0.}] ->
  Text[labely, {b, c}, {0, 0}, {0, 1}];
g[[1, 2]] = g[[1, 2]] /.
  Text[a_, {b_, c_}, {1., 0.}] ->
  Text[a, {b - 1.5, c}, {0, 0}, {0, 1}];
g[[1, 2]] = g[[1, 2]] /.
  Text[labelx, {b_, c_}, {0., -1.}] ->
  Text[labelx, {b, c + 1100}, {0, -1}, {1, 0}];
g[[1, 2]] = g[[1, 2]] /.
  Text[a_, {b_, c_}, {0., -1.}] ->
  Text[a, {b, c + 550}, {0, 0}, {0, 1}];
g2 = Show[g,
  AspectRatio -> GoldenRatio * 1.2,
  PlotRange -> All,
  DisplayFunction -> Identity];

```

(\* Create Selected Sorted Yeast Arraylets Graph Display \*)

```

arraylets = Transpose[arraylets1];

arraylets3 = Chop[TrigFit[arraylets[[3]], 1, {x, genes - 1}], 0.001]
arraylets4 = Chop[TrigFit[arraylets[[4]], 1, {x, genes - 1}], 0.001]
arraylets5 = Chop[TrigFit[arraylets[[5]], 1, {x, genes - 1}], 0.001]
arraylets14 = Chop[TrigFit[arraylets[[14]], 1, {x, genes - 1}], 0.001]
arraylets15 = Chop[TrigFit[arraylets[[15]], 1, {x, genes - 1}], 0.001]
arraylets16 = Chop[TrigFit[arraylets[[16]], 1, {x, genes - 1}], 0.001]

-0.00350482 Cos[ $\frac{\pi x}{2261}$ ] + 0.0105327 Sin[ $\frac{\pi x}{2261}$ ]

-0.00146993 + 0.011125 Cos[ $\frac{\pi x}{2261}$ ]

0.00621296 Cos[ $\frac{\pi x}{2261}$ ] + 0.00846298 Sin[ $\frac{\pi x}{2261}$ ]

-0.0012217 + 0.00423362 Cos[ $\frac{\pi x}{2261}$ ] + 0.00682806 Sin[ $\frac{\pi x}{2261}$ ]

0.00425716 Cos[ $\frac{\pi x}{2261}$ ] - 0.00622375 Sin[ $\frac{\pi x}{2261}$ ]

-0.00500703 Cos[ $\frac{\pi x}{2261}$ ]

```

```

graph = ParametricPlot[{arraylets3, -x},
  {x, 0, genes - 1},
  PlotStyle -> {RGBColor[0, 0, 0], Thickness[0.016]},
  DisplayFunction -> Identity];
labelx = "(c) Expression Level";
labely = ColumnForm[{" ", " ", " ", " ", " ", " ", " ", " ", " ", " "}, Center];
framex = {{0, "0"}, {0.06, "0.06"}, {0.12, "0.12"};
coordinates = Table[
  If[arraylets[[3, a]] < -0.025 * 1.2, -0.025 * 1.2,
  If[arraylets[[3, a]] > 0.125 * 1.2, 0.125 * 1.2, arraylets[[3, a]]],
  {a, 1, genes}];
coordinates = Table[{coordinates[[a]], -a + 1}, {a, 1, genes}];
line = Line[coordinates];
g = Show[
  {Graphics[{RGBColor[1, 0, 0], line}},
  graph},
  Frame -> True,
  FrameLabel -> {None, labely, labelx, None},
  FrameTicks -> {None, None, framex, None},
  GridLines -> {{0, RGBColor[0, 0, 0]}, None},
  AspectRatio -> GoldenRatio * 1.15,
  PlotRange -> {{-0.025 * 1.2, 0.125 * 1.2}, {135, -genes + 1 - 135}},
  DisplayFunction -> Identity];
g = FullGraphics[g];
g[[1, 2]] = g[[1, 2]] /.
  Text[labely, {b_, c_}, {1., 0.}] ->
  Text[labely, {b, c}, {0, 0}, {0, 1}];
g[[1, 2]] = g[[1, 2]] /.
  Text[a_, {b_, c_}, {1., 0.}] ->
  Text[a, {b - 0.01, c}, {0, 0}, {0, 1}];
g[[1, 2]] = g[[1, 2]] /.
  Text[labelx, {b_, c_}, {0., -1.}] ->
  Text[labelx, {b, c + 1125}, {0, -1}, {1, 0}];
g[[1, 2]] = g[[1, 2]] /.
  Text[a_, {b_, c_}, {0., -1.}] ->
  Text[a, {b, c + 575}, {0, 0}, {0, 1}];
p3 = Show[g,
  AspectRatio -> GoldenRatio * 1.2765,
  PlotRange -> All,
  DisplayFunction -> Identity];

```

```

graph = ParametricPlot[{arraylets4 + 0.05 * 1.2, -x},
  {x, 0, genes - 1},
  PlotStyle -> {RGBColor[0, 0, 0], Thickness[0.016]},
  DisplayFunction -> Identity];
labelx = "(c) Expression Level";
labely = ColumnForm[{" ", " ", " ", " ", " ", " ", " ", " ", " ", " "}, Center];
framex = {{0, "0"}, {0.06, "0.06"}, {0.12, "0.12"};
coordinates = Table[
  If[arraylets[[4, a]] + 0.05 * 1.2 > 0.125 * 1.2, 0.125 * 1.2,
  If[arraylets[[4, a]] + 0.05 * 1.2 < -0.025 * 1.2, -0.025 * 1.2, arraylets[[4, a]] + 0.05 * 1.2]],
  {a, 1, genes}];
coordinates = Table[{coordinates[[a]], -a + 1}, {a, 1, genes}];
line = Line[coordinates];
g = Show[
  {Graphics[{RGBColor[0, 0, 1], line}},
  graph},
  Frame -> True,
  FrameLabel -> {None, labely, labelx, None},
  FrameTicks -> {None, None, framex, None},
  GridLines -> {{0.05 * 1.2, RGBColor[0, 0, 0]}}, None},
  AspectRatio -> GoldenRatio * 1.15,
  PlotRange -> {{-0.025 * 1.2, 0.125 * 1.2}, {135, -genes + 1 - 135}},
  DisplayFunction -> Identity];
g = FullGraphics[g];
g[[1, 2]] = g[[1, 2]] /.
  Text[labely, {b_, c_}, {1., 0.}] ->
  Text[labely, {b, c}, {0, 0}, {0, 1}];
g[[1, 2]] = g[[1, 2]] /.
  Text[a_, {b_, c_}, {1., 0.}] ->
  Text[a, {b - 0.01, c}, {0, 0}, {0, 1}];
g[[1, 2]] = g[[1, 2]] /.
  Text[labelx, {b_, c_}, {0., -1.}] ->
  Text[labelx, {b, c + 1125}, {0, -1}, {1, 0}];
g[[1, 2]] = g[[1, 2]] /.
  Text[a_, {b_, c_}, {0., -1.}] ->
  Text[a, {b, c + 575}, {0, 0}, {0, 1}];
p4 = Show[g,
  AspectRatio -> GoldenRatio * 1.2765,
  PlotRange -> All,
  DisplayFunction -> Identity];

```

```

graph = ParametricPlot[{arraylets5 + 0.1 * 1.2, -x},
  {x, 0, genes - 1},
  PlotStyle -> {RGBColor[0, 0, 0], Thickness[0.016]},
  DisplayFunction -> Identity];
labelx = "(c) Expression Level";
labely = ColumnForm[{" ", " ", " ", " ", " ", " ", " ", " ", " ", " "}, Center];
framex = {{0, "0"}, {0.06, "0.06"}, {0.12, "0.12"};
coordinates = Table[
  If[arraylets[[5, a]] + 0.1 * 1.2 < -0.025 * 1.2, -0.025 * 1.2,
  If[arraylets[[5, a]] + 0.1 * 1.2 > 0.125 * 1.2, 0.125 * 1.2, arraylets[[5, a]] + 0.1 * 1.2],
  {a, 1, genes}];
coordinates = Table[{coordinates[[a]], -a + 1}, {a, 1, genes}];
line = Line[coordinates];
g = Show[
  {Graphics[{RGBColor[0, 0.5, 0], line}],
  graph},
  Frame -> True,
  FrameLabel -> {None, labely, labelx, None},
  FrameTicks -> {None, None, framex, None},
  GridLines -> {{{0.1 * 1.2, RGBColor[0, 0, 0]}}, None},
  AspectRatio -> GoldenRatio * 1.15,
  PlotRange -> {{-0.025 * 1.2, 0.125 * 1.2}, {135, -genes + 1 - 135}},
  DisplayFunction -> Identity];
g = FullGraphics[g];
g[[1, 2]] = g[[1, 2]] /.
  Text[labely, {b_, c_}, {1., 0.}] ->
  Text[labely, {b, c}, {0, 0}, {0, 1}];
g[[1, 2]] = g[[1, 2]] /.
  Text[a_, {b_, c_}, {1., 0.}] ->
  Text[a, {b - 0.01, c}, {0, 0}, {0, 1}];
g[[1, 2]] = g[[1, 2]] /.
  Text[labelx, {b_, c_}, {0., -1.}] ->
  Text[labelx, {b, c + 1125}, {0, -1}, {1, 0}];
g[[1, 2]] = g[[1, 2]] /.
  Text[a_, {b_, c_}, {0., -1.}] ->
  Text[a, {b, c + 575}, {0, 0}, {0, 1}];
p5 = Show[g,
  AspectRatio -> GoldenRatio * 1.2765,
  PlotRange -> All,
  DisplayFunction -> Identity];

```

```

graph = ParametricPlot[{arraylets14, -x},
  {x, 0, genes - 1},
  PlotStyle -> {RGBColor[0, 0, 0], Thickness[0.016]},
  DisplayFunction -> Identity];
labelx = "(d) Expression Level";
labely = ColumnForm[{" ", " ", " ", " ", " ", " ", " ", " ", " ", " "}, Center];
framex = {{0, "0"}, {0.06, "0.06"}, {0.12, "0.12"};
coordinates = Table[
  If[arraylets[[14, a]] < -0.025 * 1.2, -0.025 * 1.2,
  If[arraylets[[14, a]] > 0.125 * 1.2, 0.125 * 1.2, arraylets[[14, a]]],
  {a, 1, genes}];
coordinates = Table[{coordinates[[a]], -a + 1}, {a, 1, genes}];
line = Line[coordinates];
g = Show[
  {Graphics[{RGBColor[1, 0, 0], line}},
  graph},
  Frame -> True,
  FrameLabel -> {None, labely, labelx, None},
  FrameTicks -> {None, None, framex, None},
  GridLines -> {{0, RGBColor[0, 0, 0]}, None},
  AspectRatio -> GoldenRatio * 1.15,
  PlotRange -> {{-0.025 * 1.2, 0.125 * 1.2}, {135, -genes + 1 - 135}},
  DisplayFunction -> Identity];
g = FullGraphics[g];
g[[1, 2]] = g[[1, 2]] /.
  Text[labely, {b_, c_}, {1., 0.}] ->
  Text[labely, {b, c}, {0, 0}, {0, 1}];
g[[1, 2]] = g[[1, 2]] /.
  Text[a_, {b_, c_}, {1., 0.}] ->
  Text[a, {b - 0.01, c}, {0, 0}, {0, 1}];
g[[1, 2]] = g[[1, 2]] /.
  Text[labelx, {b_, c_}, {0., -1.}] ->
  Text[labelx, {b, c + 1125}, {0, -1}, {1, 0}];
g[[1, 2]] = g[[1, 2]] /.
  Text[a_, {b_, c_}, {0., -1.}] ->
  Text[a, {b, c + 575}, {0, 0}, {0, 1}];
p14 = Show[g,
  AspectRatio -> GoldenRatio * 1.2765,
  PlotRange -> All,
  DisplayFunction -> Identity];

```



```

graph = ParametricPlot[{arraylets15 + 0.05 * 1.2, -x},
  {x, 0, genes - 1},
  PlotStyle -> {RGBColor[0, 0, 0], Thickness[0.016]},
  DisplayFunction -> Identity];
labelx = "(d) Expression Level";
labely = ColumnForm[{" ", " ", " ", " ", " ", " ", " ", " ", " ", " "}, Center];
framex = {{0, "0"}, {0.06, "0.06"}, {0.12, "0.12"};
coordinates = Table[
  If[arraylets[[15, a]] + 0.05 * 1.2 > 0.125 * 1.2, 0.125 * 1.2,
  If[arraylets[[15, a]] + 0.05 * 1.2 < -0.025 * 1.2, -0.025 * 1.2, arraylets[[15, a]] + 0.05 * 1.2],
  {a, 1, genes}];
coordinates = Table[{coordinates[[a]], -a + 1}, {a, 1, genes}];
line = Line[coordinates];
g = Show[
  {Graphics[{RGBColor[0, 0, 1], line}},
  graph},
  Frame -> True,
  FrameLabel -> {None, labely, labelx, None},
  FrameTicks -> {None, None, framex, None},
  GridLines -> {{0.05 * 1.2, RGBColor[0, 0, 0]}}, None},
  AspectRatio -> GoldenRatio * 1.15,
  PlotRange -> {{-0.025 * 1.2, 0.125 * 1.2}, {135, -genes + 1 - 135}},
  DisplayFunction -> Identity];
g = FullGraphics[g];
g[[1, 2]] = g[[1, 2]] /.
  Text[labely, {b_, c_}, {1., 0.}] ->
  Text[labely, {b, c}, {0, 0}, {0, 1}];
g[[1, 2]] = g[[1, 2]] /.
  Text[a_, {b_, c_}, {1., 0.}] ->
  Text[a, {b - 0.01, c}, {0, 0}, {0, 1}];
g[[1, 2]] = g[[1, 2]] /.
  Text[labelx, {b_, c_}, {0., -1.}] ->
  Text[labelx, {b, c + 1125}, {0, -1}, {1, 0}];
g[[1, 2]] = g[[1, 2]] /.
  Text[a_, {b_, c_}, {0., -1.}] ->
  Text[a, {b, c + 575}, {0, 0}, {0, 1}];
p15 = Show[g,
  AspectRatio -> GoldenRatio * 1.2765,
  PlotRange -> All,
  DisplayFunction -> Identity];

```

```

graph = ParametricPlot[{arraylets16 + 0.1 * 1.2, -x},
  {x, 0, genes - 1},
  PlotStyle -> {RGBColor[0, 0, 0], Thickness[0.016]},
  DisplayFunction -> Identity];
labelx = "(d) Expression Level";
labely = ColumnForm[{" ", " ", " ", " ", " ", " ", " ", " ", " ", " "}, Center];
framex = {{0, "0"}, {0.06, "0.06"}, {0.12, "0.12"};
coordinates = Table[
  If[arraylets[[16, a]] + 0.1 * 1.2 > 0.125 * 1.2, 0.125 * 1.2, arraylets[[16, a]] + 0.1 * 1.2,
  {a, 1, genes}];
coordinates = Table[{coordinates[[a]], -a + 1}, {a, 1, genes}];
line = Line[coordinates];
g = Show[
  {Graphics[{RGBColor[0, 0.5, 0], line}],
  graph},
  Frame -> True,
  FrameLabel -> {None, labely, labelx, None},
  FrameTicks -> {None, None, framex, None},
  GridLines -> {{{0.1 * 1.2, RGBColor[0, 0, 0]}}, None},
  AspectRatio -> GoldenRatio * 1.15,
  PlotRange -> {{-0.025 * 1.2, 0.125 * 1.2}, {135, -genes + 1 - 135}},
  DisplayFunction -> Identity];
g = FullGraphics[g];
g[[1, 2]] = g[[1, 2]] /.
  Text[labely, {b_, c_}, {1., 0.}] ->
  Text[labely, {b, c}, {0, 0}, {0, 1}];
g[[1, 2]] = g[[1, 2]] /.
  Text[a_, {b_, c_}, {1., 0.}] ->
  Text[a, {b - 0.01, c}, {0, 0}, {0, 1}];
g[[1, 2]] = g[[1, 2]] /.
  Text[labelx, {b_, c_}, {0., -1.}] ->
  Text[labelx, {b, c + 1125}, {0, -1}, {1, 0}];
g[[1, 2]] = g[[1, 2]] /.
  Text[a_, {b_, c_}, {0., -1.}] ->
  Text[a, {b, c + 575}, {0, 0}, {0, 1}];
p16 = Show[g,
  AspectRatio -> GoldenRatio * 1.2765,
  PlotRange -> All,
  DisplayFunction -> Identity];

(* Display Selected Sorted Yeast Arraylets *)

g3 = Show[{p3, p4, p5},
  DisplayFunction -> Identity];
g4 = Show[{p16, p14, p15},
  DisplayFunction -> Identity];

```

(\* Display Reconstructed Sorted Yeast Data, Arraylets and Selected Arraylets \*)

```
Show[GraphicsArray[{g1, g2, g3, g4}],  
GraphicsSpacing -> -0.225];
```

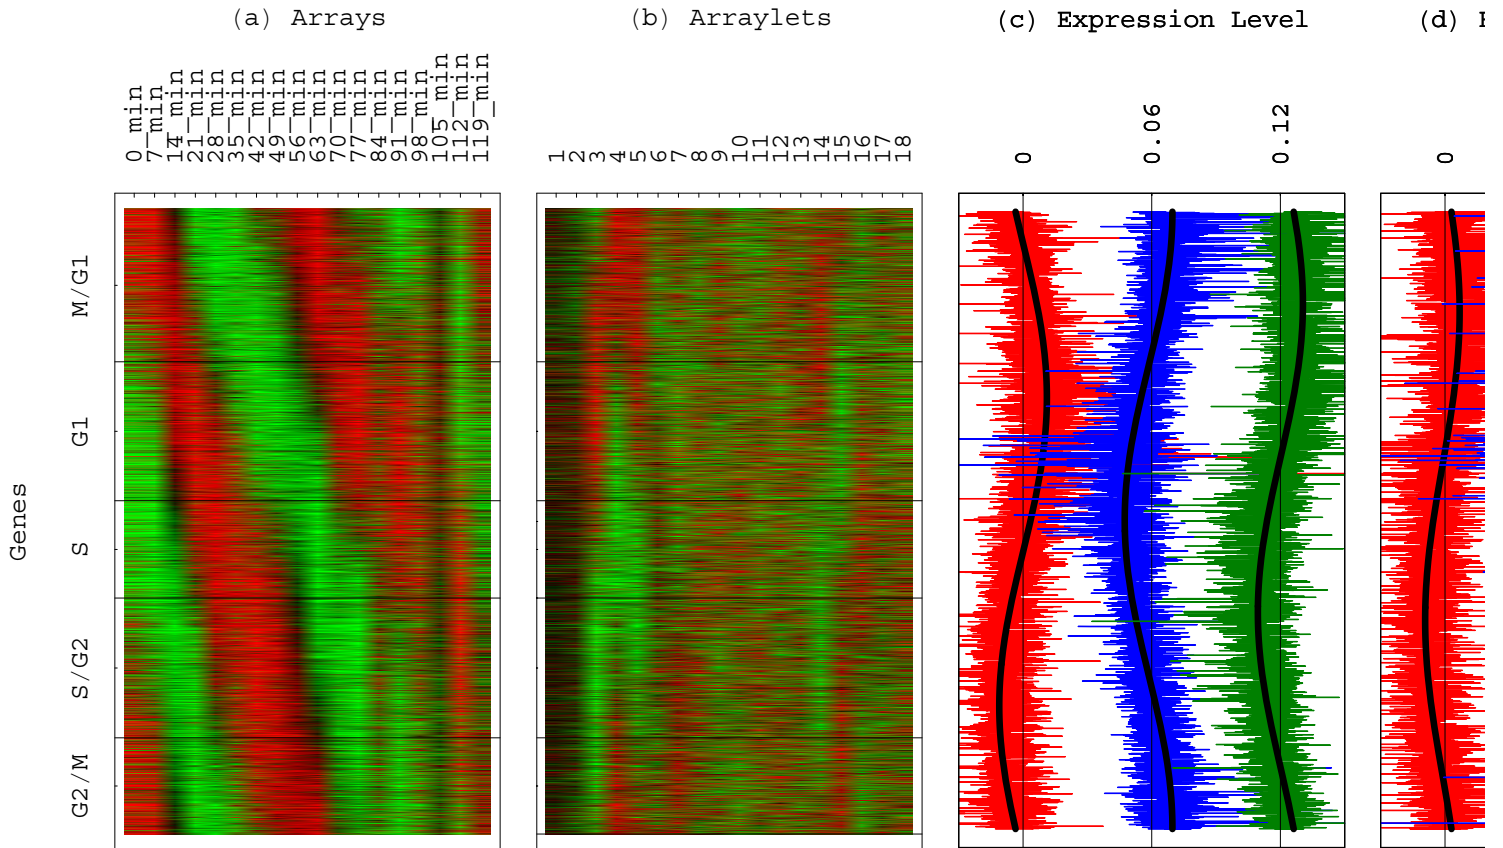

```
(* Calculate SVD Yeast Cell Cycle Subspace *)
```

```
(* Read Yeast Data *)
```

```
stream = "Desktop/Networks/Data/Y_SVD.txt.nb";  
matrix = ReadList[stream, Word, RecordLists -> True, NullWords -> True];  
{genes, arrays} = Dimensions[matrix] - {2, 6}  
Clear[stream];  
  
{4579, 22}  
  
genenames = TakeRows [  
  TakeColumns[matrix, {1, 6}],  
  {3, genes + 2}];  
arraynames = TakeColumns [  
  TakeRows[matrix, {1, 2}],  
  {7, arrays + 6}];  
matrix = TakeColumns [  
  TakeRows[matrix, {3, genes + 2}],  
  {7, arrays + 6}];  
matrix = ToExpression[matrix];  
  
sizes = Flatten [  
  Table [  
    Dimensions [  
      Characters [  
        ToString[arraynames[[2, a]]  
        ]],  
    {a, 1, arrays}]]];  
size = Sort[sizes, OrderedQ[{{#2, #1}}] &][[1]];  
Do [  
  Do[arraynames[[2, a]] = StringJoin[ToString[arraynames[[2, a]]], " "],  
    {b, 1, size - sizes[[a]]}],  
  {a, 1, arrays}];  
  
genes2 = genes;  
genenames2 = genenames;  
arrays2 = arrays;  
arraynames2 = arraynames;
```

```
(* Examine Raw Data *)
```

```
(* Calculate Singular Value Decomposition *)
```

```
correlation = Dot[Transpose[matrix], matrix] / (arrays - 1);  
{eigenexpressions, eigengenes} = Eigensystem[correlation];  
eigenexpressions = Sqrt[(arrays - 1) * eigenexpressions];  
Clear[correlation];  
eigengenes[[2]] = -eigengenes[[2]];  
eigengenes[[4]] = -eigengenes[[4]];  
eigengenes[[5]] = -eigengenes[[5]];  
eigengenes[[6]] = -eigengenes[[6]];  
eigengenes[[7]] = -eigengenes[[7]];  
eigengenes[[8]] = -eigengenes[[8]];  
eigengenes[[9]] = -eigengenes[[9]];  
eigenarrays = Dot[eigengenes, Transpose[matrix]];  
Do[  
  eigenarrays[[a]] = eigenarrays[[a]] / eigenexpressions[[a]],  
  {a, 1, arrays}];  
eigenarrays = Transpose[eigenarrays];  
fractions = eigenexpressions^2 / Sum[eigenexpressions[[a]]^2, {a, 1, arrays}];  
entropy = -N[Sum[fractions[[a]] * Log[fractions[[a]]], {a, 1, arrays}] / Log[arrays];  
entropy = N[Round[100 * entropy] / 100]
```

```
0.25
```

```
(* Create Fractions Bar Charts Displays *)
```

```
fractions[[2]]
```

```
0.0946134
```

```
limit = 0.1;
```

```

Clear[gridx, framex, framey, sizes];
gridx = Table[a, {a, 0, limit, N[limit/4]}];
framex = gridx;
sizes = Flatten[
  Table[
    Dimensions[
      Characters[
        ToString[framex[[a]]]
      ], {a, 1, 5}]];
Do[
  Do[framex[[a]] = StringJoin[ToString[framex[[a]]], " ",
    {b, 1, 5 - sizes[[a]]},
    {a, 1, 5}];
  framex = Table[{gridx[[a]], framex[[a]]}, {a, 1, 5}];
  gridx = Table[{gridx[[a]], RGBColor[0, 0, 0]}, {a, 1, 5}];
  framey = Table[{a + 1, arrays - a - 7}, {a, 0, 15 - 2}];
  table = Table[fractions[[arrays - a]], {a, 7, arrays - 2}];
  g = BarChart[
    table,
    BarOrientation -> Horizontal,
    PlotRange -> {{0, limit * 1.0001}, {0.5, 15 - 1 + 0.5}},
    AspectRatio -> 1,
    Axes -> False,
    Frame -> True,
    FrameTicks -> {None, framey, framex, None},
    FrameLabel -> {None, None, None, None},
    GridLines -> {gridx, None},
    DisplayFunction -> Identity];
g = FullGraphics[g];
g[[1, 2]] = g[[1, 2]] /.
  Text[a_, {b_, c_}, {0., -1.}] ->
  Text[a, {b, c + 1.75}, {0, 0}, {0, 1}];
g1 = Show[g,
  AspectRatio -> 1.25,
  PlotRange -> All,
  DisplayFunction -> Identity];

```

```

gridx = Table[a, {a, 0, 1, 0.2}];
framex = gridx;
sizes = Flatten[
  Table[
    Dimensions[
      Characters[
        ToString[framex[[a]]
      ]], {a, 1, 6}]];
Do[
  Do[framex[[a]] = StringJoin[ToString[framex[[a]]], " "],
    {b, 1, size - sizes[[a]]},
  {a, 1, 6}];
framex = Table[{gridx[[a]], framex[[a]]}, {a, 1, 6}];
gridx = Table[{gridx[[a]], RGBColor[0, 0, 0]}, {a, 1, 6}];
framey = Table[{a + 1, arrays - a}, {a, 0, arrays - 1}];
labelx = ColumnForm[
  {"(b) Eigenexpression Fraction", StringJoin["d = ", ToString[entropy]], " "}, Center];
g = BarChart[
  Table[fractions[[arrays - a]], {a, 0, arrays - 1}],
  BarOrientation -> Horizontal,
  PlotRange -> {{0, 1.0001}, {0.5, arrays + 0.5}},
  AspectRatio -> 1,
  Axes -> False,
  Frame -> True,
  FrameTicks -> {None, framey, framex, None},
  FrameLabel -> {None, None, labelx, None},
  GridLines -> {gridx, None},
  DisplayFunction -> Identity];
g = FullGraphics[g];
g[[1, 2]] = g[[1, 2]] /.
  Text[labelx, {b_, c_}, {0., -1.}] ->
  Text[labelx, {b, c + 3}, {0, -1}, {1, 0}];
g[[1, 2]] = g[[1, 2]] /.
  Text[a_, {b_, c_}, {0., -1.}] ->
  Text[a, {b, c + 3.78}, {0, 0}, {0, 1}];
g2 = Show[{g,
  Graphics[{RGBColor[1, 1, 0.8], Rectangle[{0.1, 0.6}, {0.98, 20.6}]},
  Graphics[{Rectangle[{0.1, 0.6}, {0.98, 20.6}, g1]}]},
  AspectRatio -> 1.35,
  PlotRange -> All,
  DisplayFunction -> Identity];

```

(\* Create Eigengenes 2 D Red & Green Raster Display \*)

```

contrast = 3.5;
displaying = Table[
  If[contrast * eigengenes[[i, j]] > 0,
    If[contrast * eigengenes[[i, j]] < 1, {contrast * eigengenes[[i, j]], 0}, {1, 0}],
    If[contrast * eigengenes[[i, j]] > -1, {0, -contrast * eigengenes[[i, j]]}, {0, 1}]],
  {i, 1, arrays}, {j, 1, arrays}];

```

```

framex = Table[{a - 0.5, arraynames[[2, a]]}, {a, 1, arrays}];
framey = Table[{a + 1 - 0.5, arrays - a}, {a, 0, arrays - 1}];
labely = "Eigengenes";
labelx = ColumnForm[{"(a) Arrays", " ", " "}, Center];
g = Show[
  Graphics[
    RasterArray[
      Table[
        RGBColor[
          displaying[[i, j, 1]], displaying[[i, j, 2]], 0
        ], {i, arrays, 1, -1}, {j, 1, arrays}]]],
  AspectRatio -> 1,
  Frame -> True,
  FrameTicks -> {None, framey, framex, None},
  FrameLabel -> {None, labely, labelx, None},
  DisplayFunction -> Identity];
g = FullGraphics[g];
g[[1, 2]] = g[[1, 2]] /.
  Text[labely, {b_, c_}, {1., 0.}] ->
  Text[labely, {b - 3, c}, {0, 0}, {0, 1}];
g[[1, 2]] = g[[1, 2]] /.
  Text[labelx, {b_, c_}, {0., -1.}] ->
  Text[labelx, {b, c + 3}, {0, -1}, {1, 0}];
g[[1, 2]] = g[[1, 2]] /.
  Text[a_, {b_, c_}, {0., -1.}] ->
  Text[a, {b, c + 3.78}, {0, 0}, {0, 1}];
g1 = Show[g,
  AspectRatio -> 1.05,
  PlotRange -> All,
  DisplayFunction -> Identity];

(* Create Selected Eigengenes Graph Display *)

eigengenes1 = Chop[TrigFit[eigengenes[[1]], 2, {x, arrays - 1}], 0.05]
eigengenes4 = Chop[TrigFit[Drop[Drop[eigengenes[[4]], {19, 22}], {1}], 2, {x - 1, arrays - 5}], 0.05]
eigengenes5 = Chop[TrigFit[Drop[Drop[eigengenes[[5]], {19, 22}], {1}], 2, {x - 1, arrays - 5}], 0.05]
eigengenes6 = Chop[TrigFit[Drop[Drop[eigengenes[[6]], {19, 22}], {1}], 2, {x - 1, arrays - 5}], 0.1]
eigengenes7 = Chop[TrigFit[Drop[Drop[eigengenes[[7]], {19, 22}], {1}], 2, {x - 1, arrays - 5}], 0.05]
eigengenes9 = Chop[TrigFit[Drop[Drop[eigengenes[[9]], {19, 22}], {1}], 2, {x - 1, arrays - 5}], 0.15]
eigengenes11 = Chop[TrigFit[Drop[Drop[eigengenes[[11]], {19, 22}], {1}], 2, {x - 1, arrays - 5}], 0.15]

```

-0.211007

$$0.0904703 \sin\left[\frac{4}{17} \pi (-1 + x)\right]$$

$$0.13624 \sin\left[\frac{2}{17} \pi (-1 + x)\right] + 0.151972 \sin\left[\frac{4}{17} \pi (-1 + x)\right]$$

$$0.134031 \cos\left[\frac{2}{17} \pi (-1 + x)\right] + 0.121332 \cos\left[\frac{4}{17} \pi (-1 + x)\right]$$

$$0.0788436 \cos\left[\frac{2}{17} \pi (-1 + x)\right] + 0.0901957 \sin\left[\frac{4}{17} \pi (-1 + x)\right]$$

$$0.195534 \cos\left[\frac{4}{17} \pi (-1 + x)\right] - 0.15699 \sin\left[\frac{2}{17} \pi (-1 + x)\right]$$

$$-0.172737 \sin\left[\frac{2}{17} \pi (-1 + x)\right] + 0.179714 \sin\left[\frac{4}{17} \pi (-1 + x)\right]$$



```

labelx = ColumnForm[{"(c) Arrays"}, Center];
labely = ColumnForm[{" ", "Expression Level"}, Center];
framex = Table[{a - 1, arraynames[[2, a]]}, {a, 1, arrays}];
framey = {-1, -0.5, 0, 0.5, 1};
coordinates = Table[{a - 1, eigengenes[[1, a]]}, {a, 1, arrays}];
points = Table[Point[coordinates[[a]]], {a, 1, arrays}];
line = Line[coordinates];
g = Show[
  {Graphics[{RGBColor[1, 0, 0], PointSize[0.022], points}},
  Graphics[{RGBColor[1, 0, 0], line}]},
  Frame -> True,
  FrameLabel -> {None, labely, labelx, None},
  GridLines -> {{{17.5, RGBColor[0, 0, 0]}, {19.5, RGBColor[0, 0, 0]}}, {{0, RGBColor[0, 0, 0]}},
  FrameTicks -> {None, framey, framex, None},
  PlotRange -> {-1.05, 1.05},
  DisplayFunction -> Identity];
g = FullGraphics[g];
g[[1, 2]] = g[[1, 2]] /.
  Text[labely, {b_, c_}, {1., 0.}] ->
  Text[labely, {b - 5.4, c}, {0, 0}, {0, 1}];
g[[1, 2]] = g[[1, 2]] /.
  Text[labelx, {b_, c_}, {0., -1.}] ->
  Text[labelx, {b, c + 0.625}, {0, -1}, {1, 0}];
g[[1, 2]] = g[[1, 2]] /.
  Text[a_, {b_, c_}, {0., -1.}] ->
  Text[a, {b, c + 0.35}, {0, 0}, {0, 1}];
p1 = Show[g,
  AspectRatio -> 1.05,
  PlotRange -> All,
  DisplayFunction -> Identity];

labelx = ColumnForm[{"(c) Arrays"}, Center];
labely = ColumnForm[{" ", "Expression Level"}, Center];
framex = Table[{a - 1, arraynames[[2, a]]}, {a, 1, arrays}];
framey = {-1, -0.5, 0, 0.5, 1};
coordinates = Table[{a - 1, eigengenes[[2, a]]}, {a, 1, arrays}];
points = Table[Point[coordinates[[a]]], {a, 1, arrays}];
line = Line[coordinates];
g = Show[
  {Graphics[{RGBColor[0, 0, 1], PointSize[0.022], points}},
  Graphics[{RGBColor[0, 0, 1], line}]},
  Frame -> True,
  FrameLabel -> {None, labely, labelx, None},
  GridLines -> {{{17.5, RGBColor[0, 0, 0]}, {19.5, RGBColor[0, 0, 0]}}, {{0, RGBColor[0, 0, 0]}},
  FrameTicks -> {None, framey, framex, None},
  PlotRange -> {-1.05, 1.05},
  DisplayFunction -> Identity];
g = FullGraphics[g];
g[[1, 2]] = g[[1, 2]] /.
  Text[labely, {b_, c_}, {1., 0.}] ->
  Text[labely, {b - 5.4, c}, {0, 0}, {0, 1}];
g[[1, 2]] = g[[1, 2]] /.
  Text[labelx, {b_, c_}, {0., -1.}] ->
  Text[labelx, {b, c + 0.625}, {0, -1}, {1, 0}];
g[[1, 2]] = g[[1, 2]] /.
  Text[a_, {b_, c_}, {0., -1.}] ->
  Text[a, {b, c + 0.35}, {0, 0}, {0, 1}];
p2 = Show[g,
  AspectRatio -> 1.05,
  PlotRange -> All,
  DisplayFunction -> Identity];

```

```

labelx = ColumnForm[{"(c) Arrays"}, Center];
labeledy = ColumnForm[{" ", "Expression Level"}, Center];
framex = Table[{a - 1, arraynames[[2, a]]}, {a, 1, arrays}];
framey = {-1, -0.5, 0, 0.5, 1};
coordinates = Table[{a - 1, eigengenes[[3, a]]}, {a, 1, arrays}];
points = Table[Point[coordinates[[a]]], {a, 1, arrays}];
line = Line[coordinates];
g = Show[
  {Graphics[{RGBColor[0, 0.5, 0], PointSize[0.022], points}],
    Graphics[{RGBColor[0, 0.5, 0], line}]},
  Frame -> True,
  FrameLabel -> {None, labeledy, labelx, None},
  GridLines -> {{{17.5, RGBColor[0, 0, 0]}, {19.5, RGBColor[0, 0, 0]}}, {{0, RGBColor[0, 0, 0]}},
  FrameTicks -> {None, framey, framex, None},
  PlotRange -> {-1.05, 1.05},
  DisplayFunction -> Identity];
g = FullGraphics[g];
g[[1, 2]] = g[[1, 2]] /.
  Text[labeledy, {b_, c_}, {1., 0.}] ->
  Text[labeledy, {b - 5.4, c}, {0, 0}, {0, 1}];
g[[1, 2]] = g[[1, 2]] /.
  Text[labelx, {b_, c_}, {0., -1.}] ->
  Text[labelx, {b, c + 0.625}, {0, -1}, {1, 0}];
g[[1, 2]] = g[[1, 2]] /.
  Text[a_, {b_, c_}, {0., -1.}] ->
  Text[a, {b, c + 0.35}, {0, 0}, {0, 1}];
p3 = Show[g,
  AspectRatio -> 1.05,
  PlotRange -> All,
  DisplayFunction -> Identity];

```

```

graph = Plot[
  eigengenes4,
  {x, 1, arrays - 5},
  PlotStyle -> {RGBColor[1, 0, 0], Dashing[{0.03, 0.02}]},
  DisplayFunction -> Identity];
labelx = ColumnForm[{"(d) Arrays", Center];
labely = ColumnForm[{" ", "Expression Level", Center];
framex = Table[{a - 1, arraynames[[2, a]]}, {a, 1, arrays}];
framey = {-1, -0.5, 0, 0.5, 1};
coordinates = Table[{a - 1, eigengenes[[4, a]]}, {a, 1, arrays}];
points = Table[Point[coordinates[[a]]], {a, 1, arrays}];
line = Line[coordinates];
g = Show[
  {Graphics[{RGBColor[1, 0, 0], PointSize[0.022], points}],
  Graphics[{RGBColor[1, 0, 0], line}],
  graph},
  Frame -> True,
  FrameLabel -> {None, labely, labelx, None},
  GridLines -> {{{17.5, RGBColor[0, 0, 0]}, {19.5, RGBColor[0, 0, 0]}}, {{0, RGBColor[0, 0, 0]}}},
  FrameTicks -> {None, framey, framex, None},
  PlotRange -> {-1.05, 1.05},
  DisplayFunction -> Identity];
g = FullGraphics[g];
g[[1, 2]] = g[[1, 2]] /.
  Text[labely, {b_, c_}, {1., 0.}] ->
  Text[labely, {b - 5.4, c}, {0, 0}, {0, 1}];
g[[1, 2]] = g[[1, 2]] /.
  Text[labelx, {b_, c_}, {0., -1.}] ->
  Text[labelx, {b, c + 0.625}, {0, -1}, {1, 0}];
g[[1, 2]] = g[[1, 2]] /.
  Text[a_, {b_, c_}, {0., -1.}] ->
  Text[a, {b, c + 0.35}, {0, 0}, {0, 1}];
p4 = Show[g,
  AspectRatio -> 1.05,
  PlotRange -> All,
  DisplayFunction -> Identity];

```

```

graph = Plot[
  eigengenes7,
  {x, 1, arrays - 5},
  PlotStyle -> {RGBColor[0, 0, 1], Dashing[{0.03, 0.02}]},
  DisplayFunction -> Identity];
labelx = ColumnForm[{"(d) Arrays"}, Center];
labely = ColumnForm[{" ", "Expression Level"}, Center];
framex = Table[{a - 1, arraynames[[2, a]]}, {a, 1, arrays}];
framey = {-1, -0.5, 0, 0.5, 1};
coordinates = Table[{a - 1, eigengenes[[7, a]]}, {a, 1, arrays}];
points = Table[Point[coordinates[[a]]], {a, 1, arrays}];
line = Line[coordinates];
g = Show[
  {Graphics[{RGBColor[0, 0, 1], PointSize[0.022], points}],
  Graphics[{RGBColor[0, 0, 1], line}],
  graph},
  Frame -> True,
  FrameLabel -> {None, labely, labelx, None},
  GridLines -> {{{17.5, RGBColor[0, 0, 0]}, {19.5, RGBColor[0, 0, 0]}}, {{0, RGBColor[0, 0, 0]}}},
  FrameTicks -> {None, framey, framex, None},
  PlotRange -> {-1.05, 1.05},
  DisplayFunction -> Identity];
g = FullGraphics[g];
g[[1, 2]] = g[[1, 2]] /.
  Text[labely, {b_, c_}, {1., 0.}] ->
  Text[labely, {b - 5.4, c}, {0, 0}, {0, 1}];
g[[1, 2]] = g[[1, 2]] /.
  Text[labelx, {b_, c_}, {0., -1.}] ->
  Text[labelx, {b, c + 0.625}, {0, -1}, {1, 0}];
g[[1, 2]] = g[[1, 2]] /.
  Text[a_, {b_, c_}, {0., -1.}] ->
  Text[a, {b, c + 0.35}, {0, 0}, {0, 1}];
p7 = Show[g,
  AspectRatio -> 1.05,
  PlotRange -> All,
  DisplayFunction -> Identity];

```

```

graph = Plot[
  eigengenes5,
  {x, 1, arrays - 5},
  PlotStyle -> {RGBColor[1, 0, 0], Dashing[{0.03, 0.02}]},
  DisplayFunction -> Identity];
labelx = ColumnForm[{"(e) Arrays"}, Center];
labely = ColumnForm[{" ", " "}, Center];
framex = Table[{a - 1, arraynames[[2, a]]}, {a, 1, arrays}];
framey = {-1, -0.5, 0, 0.5, 1};
coordinates = Table[{a - 1, eigengenes[[5, a]]}, {a, 1, arrays}];
points = Table[Point[coordinates[[a]]], {a, 1, arrays}];
line = Line[coordinates];
g = Show[
  {Graphics[{RGBColor[1, 0, 0], PointSize[0.022], points}],
  Graphics[{RGBColor[1, 0, 0], line}],
  graph},
  Frame -> True,
  FrameLabel -> {None, labely, labelx, None},
  GridLines -> {{{17.5, RGBColor[0, 0, 0]}, {19.5, RGBColor[0, 0, 0]}}, {{0, RGBColor[0, 0, 0]}}},
  FrameTicks -> {None, framey, framex, None},
  PlotRange -> {-1.05, 1.05},
  DisplayFunction -> Identity];
g = FullGraphics[g];
g[[1, 2]] = g[[1, 2]] /.
  Text[labely, {b_, c_}, {1., 0.}] ->
  Text[labely, {b - 5.4, c}, {0, 0}, {0, 1}];
g[[1, 2]] = g[[1, 2]] /.
  Text[labelx, {b_, c_}, {0., -1.}] ->
  Text[labelx, {b, c + 0.625}, {0, -1}, {1, 0}];
g[[1, 2]] = g[[1, 2]] /.
  Text[a_, {b_, c_}, {0., -1.}] ->
  Text[a, {b, c + 0.35}, {0, 0}, {0, 1}];
p5 = Show[g,
  AspectRatio -> 1.05,
  PlotRange -> All,
  DisplayFunction -> Identity];

```

```

labelx = ColumnForm[{"(e) Arrays"}, Center];
labely = ColumnForm[{" ", " "}, Center];
framex = Table[{a - 1, arraynames[[2, a]]}, {a, 1, arrays}];
framey = {-1, -0.5, 0, 0.5, 1};
coordinates = Table[{a - 1, eigengenes[[8, a]]}, {a, 1, arrays}];
points = Table[Point[coordinates[[a]]], {a, 1, arrays}];
line = Line[coordinates];
g = Show[
  {Graphics[{RGBColor[0, 0, 1], PointSize[0.022], points}],
   Graphics[{RGBColor[0, 0, 1], line}]},
  Frame -> True,
  FrameLabel -> {None, labely, labelx, None},
  GridLines -> {{{17.5, RGBColor[0, 0, 0]}, {19.5, RGBColor[0, 0, 0]}}, {{0, RGBColor[0, 0, 0]}}},
  FrameTicks -> {None, framey, framex, None},
  PlotRange -> {-1.05, 1.05},
  DisplayFunction -> Identity];
g = FullGraphics[g];
g[[1, 2]] = g[[1, 2]] /.
  Text[labely, {b_, c_}, {1., 0.}] ->
  Text[labely, {b - 5.4, c}, {0, 0}, {0, 1}];
g[[1, 2]] = g[[1, 2]] /.
  Text[labelx, {b_, c_}, {0., -1.}] ->
  Text[labelx, {b, c + 0.625}, {0, -1}, {1, 0}];
g[[1, 2]] = g[[1, 2]] /.
  Text[a_, {b_, c_}, {0., -1.}] ->
  Text[a, {b, c + 0.35}, {0, 0}, {0, 1}];
p8 = Show[g,
  AspectRatio -> 1.05,
  PlotRange -> All,
  DisplayFunction -> Identity];

```

```

graph = Plot[
  eigengenes11,
  {x, 1, arrays - 5},
  PlotStyle -> {RGBColor[0, 0.5, 0], Dashing[{0.03, 0.02}]},
  DisplayFunction -> Identity];
labelx = ColumnForm[{"(e) Arrays"}, Center];
labely = ColumnForm[{" ", " "}, Center];
framex = Table[{a - 1, arraynames[[2, a]]}, {a, 1, arrays}];
framey = {-1, -0.5, 0, 0.5, 1};
coordinates = Table[{a - 1, eigengenes[[11, a]]}, {a, 1, arrays}];
points = Table[Point[coordinates[[a]]], {a, 1, arrays}];
line = Line[coordinates];
g = Show[
  {Graphics[{RGBColor[0, 0.5, 0], PointSize[0.022], points}],
  Graphics[{RGBColor[0, 0.5, 0], line}],
  graph},
  Frame -> True,
  FrameLabel -> {None, labely, labelx, None},
  GridLines -> {{{17.5, RGBColor[0, 0, 0]}, {19.5, RGBColor[0, 0, 0]}}, {{0, RGBColor[0, 0, 0]}}},
  FrameTicks -> {None, framey, framex, None},
  PlotRange -> {-1.05, 1.05},
  DisplayFunction -> Identity];
g = FullGraphics[g];
g[[1, 2]] = g[[1, 2]] /.
  Text[labely, {b_, c_}, {1., 0.}] ->
  Text[labely, {b - 5.4, c}, {0, 0}, {0, 1}];
g[[1, 2]] = g[[1, 2]] /.
  Text[labelx, {b_, c_}, {0., -1.}] ->
  Text[labelx, {b, c + 0.625}, {0, -1}, {1, 0}];
g[[1, 2]] = g[[1, 2]] /.
  Text[a_, {b_, c_}, {0., -1.}] ->
  Text[a, {b, c + 0.35}, {0, 0}, {0, 1}];
p11 = Show[g,
  AspectRatio -> 1.05,
  PlotRange -> All,
  DisplayFunction -> Identity];

```

```

graph = Plot[
  eigengenes6,
  {x, 1, arrays - 5},
  PlotStyle -> {RGBColor[1, 0, 0], Dashing[{0.03, 0.02}]},
  DisplayFunction -> Identity];
labelx = ColumnForm[{"(f) Arrays"}, Center];
labeley = ColumnForm[{" ", " "}, Center];
framex = Table[{a - 1, arraynames[[2, a]]}, {a, 1, arrays}];
framey = {-1, -0.5, 0, 0.5, 1};
coordinates = Table[{a - 1, eigengenes[[6, a]]}, {a, 1, arrays}];
points = Table[Point[coordinates[[a]]], {a, 1, arrays}];
line = Line[coordinates];
g = Show[
  {Graphics[{RGBColor[1, 0, 0], PointSize[0.022], points}],
  Graphics[{RGBColor[1, 0, 0], line}],
  graph},
Frame -> True,
  FrameLabel -> {None, labeley, labelx, None},
  GridLines -> {{{17.5, RGBColor[0, 0, 0]}, {19.5, RGBColor[0, 0, 0]}}, {{0, RGBColor[0, 0, 0]}}},
  FrameTicks -> {None, framey, framex, None},
  PlotRange -> {-1.05, 1.05},
  DisplayFunction -> Identity];
g = FullGraphics[g];
g[[1, 2]] = g[[1, 2]] /.
  Text[labeley, {b_, c_}, {1., 0.}] ->
  Text[labeley, {b - 5.4, c}, {0, 0}, {0, 1}];
g[[1, 2]] = g[[1, 2]] /.
  Text[labelx, {b_, c_}, {0., -1.}] ->
  Text[labelx, {b, c + 0.625}, {0, -1}, {1, 0}];
g[[1, 2]] = g[[1, 2]] /.
  Text[a_, {b_, c_}, {0., -1.}] ->
  Text[a, {b, c + 0.35}, {0, 0}, {0, 1}];
p6 = Show[g,
  AspectRatio -> 1.05,
  PlotRange -> All,
  DisplayFunction -> Identity];

```



```

graph = Plot[
  eigengenes9,
  {x, 1, arrays - 5},
  PlotStyle -> {RGBColor[0, 0, 1], Dashing[{0.03, 0.02}]},
  DisplayFunction -> Identity];
labelx = ColumnForm[{"(f) Arrays"}, Center];
labeledy = ColumnForm[{" ", " "}, Center];
framex = Table[{a - 1, arraynames[[2, a]]}, {a, 1, arrays}];
framey = {-1, -0.5, 0, 0.5, 1};
coordinates = Table[{a - 1, eigengenes[[9, a]]}, {a, 1, arrays}];
points = Table[Point[coordinates[[a]]], {a, 1, arrays}];
line = Line[coordinates];
g = Show[
  {Graphics[{RGBColor[0, 0, 1], PointSize[0.022], points}],
  Graphics[{RGBColor[0, 0, 1], line}],
  graph},
Frame -> True,
  FrameLabel -> {None, labeledy, labelx, None},
  GridLines -> {{{17.5, RGBColor[0, 0, 0]}, {19.5, RGBColor[0, 0, 0]}}, {{0, RGBColor[0, 0, 0]}}},
  FrameTicks -> {None, framey, framex, None},
  PlotRange -> {-1.05, 1.05},
  DisplayFunction -> Identity];
g = FullGraphics[g];
g[[1, 2]] = g[[1, 2]] /.
  Text[labely, {b_, c_}, {1., 0.}] ->
  Text[labely, {b - 5.4, c}, {0, 0}, {0, 1}];
g[[1, 2]] = g[[1, 2]] /.
  Text[labelx, {b_, c_}, {0., -1.}] ->
  Text[labelx, {b, c + 0.625}, {0, -1}, {1, 0}];
g[[1, 2]] = g[[1, 2]] /.
  Text[a_, {b_, c_}, {0., -1.}] ->
  Text[a, {b, c + 0.35}, {0, 0}, {0, 1}];
p9 = Show[g,
  AspectRatio -> 1.05,
  PlotRange -> All,
  DisplayFunction -> Identity];

(* Display Selected Eigengenes *)

g3 = Show[{p3, p2, p1},
  DisplayFunction -> Identity];
g4 = Show[{p7, p4},
  DisplayFunction -> Identity];
g5 = Show[{p11, p8, p5},
  DisplayFunction -> Identity];
g6 = Show[{p9, p6},
  DisplayFunction -> Identity];

```

(\* Display Eigengenes, Fractions and Selected Eigengenes \*)

```
Show[GraphicsArray[{g1, g2, g3}],
GraphicsSpacing -> -0.15];
```

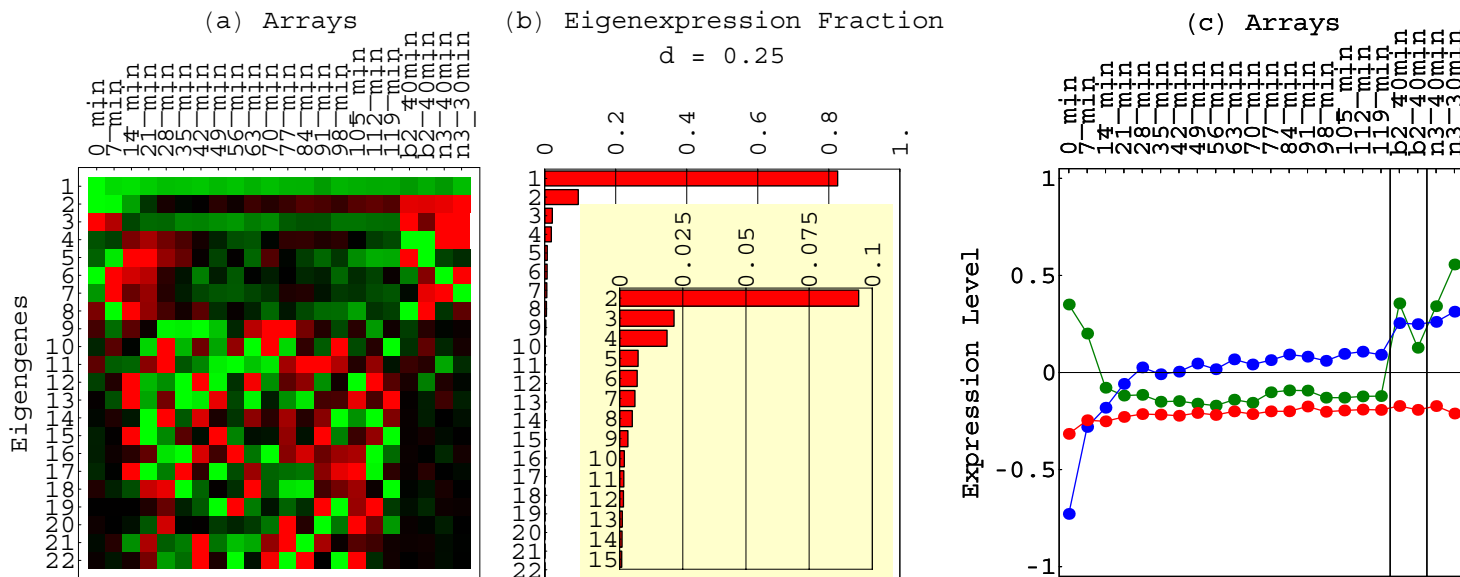

```
Show[GraphicsArray[{g4, g5, g6}],
GraphicsSpacing -> -0.15];
```

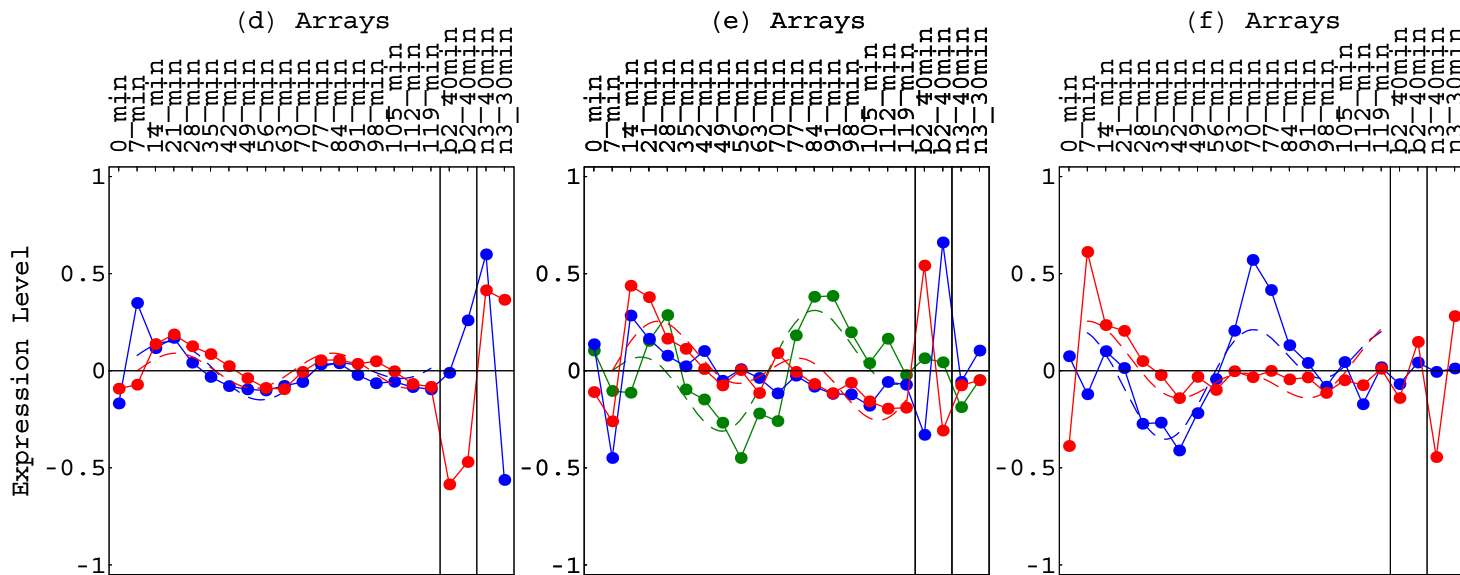

(\* Reconstruct Data Without Additive Artifacts \*)

```
eigenexpressions[[1]] = 0;
eigenexpressions[[2]] = 0;
eigenexpressions[[3]] = 0;
eigenexpressions[[10]] = 0;
Do[eigenexpressions[[a]] = 0,
{a, 12, arrays}];
matrix = Dot[eigenarrays, DiagonalMatrix[eigenexpressions], eigengenes];
```

```
(* Examine Data in Multiplicative Variance Space *)
```

```
(* Calculate Singular Value Decomposition *)
```

```
normalization = Log[matrix^2];  
correlation = Dot[Transpose[normalization], normalization] / (arrays - 1);  
{eigenexpressions, eigengenes} = Eigensystem[correlation];  
eigenexpressions = Sqrt[(arrays - 1) * eigenexpressions];  
Clear[correlation];  
eigengenes[[1]] = -eigengenes[[1]];  
eigenarrays = Dot[eigengenes, Transpose[normalization]];  
Do[  
  eigenarrays[[a]] = eigenarrays[[a]] / eigenexpressions[[a]],  
  {a, 1, arrays}];  
eigenarrays = Transpose[eigenarrays];  
fractions = eigenexpressions^2 / Sum[eigenexpressions[[a]]^2, {a, 1, arrays}];  
entropy = -N[Sum[fractions[[a]] * Log[fractions[[a]]], {a, 1, arrays}] / Log[arrays];  
entropy = N[Round[100 * entropy] / 100]
```

```
0.22
```

```
(* Create Fractions Bar Charts Displays *)
```

```
fractions[[2]]
```

```
0.0128277
```

```
limit = 0.016;
```

```
Clear[gridx, framex, framey, sizes];  
gridx = Table[a, {a, 0, limit, N[limit/4]}];  
framex = gridx;  
sizes = Flatten[  
  Table[  
    Dimensions[  
      Characters[  
        ToString[framex[[a]]]  
      ], {a, 1, 5}];  
Do[  
  Do[framex[[a]] = StringJoin[ToString[framex[[a]]], " "],  
  {b, 1, 5 - sizes[[a]]},  
  {a, 1, 5}];  
framex = Table[{gridx[[a]], framex[[a]]}, {a, 1, 5};  
gridx = Table[{gridx[[a]], RGBColor[0, 0, 0]}, {a, 1, 5};  
framey = Table[{a + 1, arrays - a - 7}, {a, 0, 15 - 2};  
table = Table[fractions[[arrays - a]], {a, 7, arrays - 2};  
g = BarChart[  
  table,  
  BarOrientation -> Horizontal,  
  PlotRange -> {{0, limit * 1.0001}, {0.5, 15 - 1 + 0.5}},  
  AspectRatio -> 1,  
  Axes -> False,  
  Frame -> True,  
  FrameTicks -> {None, framey, framex, None},  
  FrameLabel -> {None, None, None, None},  
  GridLines -> {gridx, None},  
  DisplayFunction -> Identity];  
g = FullGraphics[g];  
g[[1, 2]] = g[[1, 2]] /.  
  Text[a_, {b_, c_}, {0., -1.}] ->  
  Text[a, {b, c + 1.75}, {0, 0}, {0, 1}];  
g1 = Show[g,  
  AspectRatio -> 1.25,  
  PlotRange -> All,  
  DisplayFunction -> Identity];
```

```

gridx = Table[a, {a, 0, 1, 0.2}];
framex = gridx;
sizes = Flatten[
  Table[
    Dimensions[
      Characters[
        ToString[framex[[a]]
      ]], {a, 1, 6}]];
Do[
  Do[framex[[a]] = StringJoin[ToString[framex[[a]]], " ",
    {b, 1, size - sizes[[a]]},
    {a, 1, 6}];
  framex = Table[{gridx[[a]], framex[[a]]}, {a, 1, 6}];
  gridx = Table[{gridx[[a]], RGBColor[0, 0, 0]}, {a, 1, 6}];
  framey = Table[{a + 1, arrays - a}, {a, 0, arrays - 1}];
  labelx = ColumnForm[
    {"(b) Eigenexpression Fraction", StringJoin["d = ", ToString[entropy]], " "}, Center];
g = BarChart[
  Table[fractions[[arrays - a]], {a, 0, arrays - 1}],
  BarOrientation -> Horizontal,
  PlotRange -> {{0, 1.0001}, {0.5, arrays + 0.5}},
  AspectRatio -> 1,
  Axes -> False,
  Frame -> True,
  FrameTicks -> {None, framey, framex, None},
  FrameLabel -> {None, None, labelx, None},
  GridLines -> {gridx, None},
  DisplayFunction -> Identity];
g = FullGraphics[g];
g[[1, 2]] = g[[1, 2]] /.
  Text[labelx, {b_, c_}, {0., -1.}] ->
  Text[labelx, {b, c + 3}, {0, -1}, {1, 0}];
g[[1, 2]] = g[[1, 2]] /.
  Text[a_, {b_, c_}, {0., -1.}] ->
  Text[a, {b, c + 3.78}, {0, 0}, {0, 1}];
g2 = Show[{g,
  Graphics[{RGBColor[1, 1, 0.8], Rectangle[{0.1, 0.6}, {0.98, 20.6}]},
  Graphics[{Rectangle[{0.1, 0.6}, {0.98, 20.6}, g1]}]},
  AspectRatio -> 1.35,
  PlotRange -> All,
  DisplayFunction -> Identity];

```

(\* Create Eigengenes 2 D Red & Green Raster Display \*)

```

contrast = 3.5;
displaying = Table[
  If[contrast * eigengenes[[i, j]] > 0,
    If[contrast * eigengenes[[i, j]] < 1, {contrast * eigengenes[[i, j]], 0}, {1, 0}],
    If[contrast * eigengenes[[i, j]] > -1, {0, -contrast * eigengenes[[i, j]]}, {0, 1}]],
  {i, 1, arrays}, {j, 1, arrays}];
framex = Table[{a - 0.5, arraynames[[2, a]]}, {a, 1, arrays}];
framey = Table[{a + 1 - 0.5, arrays - a}, {a, 0, arrays - 1}];
labely = "Eigengenes";
labelx = ColumnForm[{"(a) Arrays", " ", " "}, Center];
g = Show[
  Graphics[
    RasterArray[
      Table[
        RGBColor[
          displaying[[i, j, 1]], displaying[[i, j, 2]], 0
        ], {i, arrays, 1, -1}, {j, 1, arrays}]]],
  AspectRatio -> 1,
  Frame -> True,
  FrameTicks -> {None, framey, framex, None},
  FrameLabel -> {None, labely, labelx, None},
  DisplayFunction -> Identity];
g = FullGraphics[g];
g[[1, 2]] = g[[1, 2]] /.
  Text[labely, {b_, c_}, {1., 0.}] ->
  Text[labely, {b - 3, c}, {0, 0}, {0, 1}];
g[[1, 2]] = g[[1, 2]] /.
  Text[labelx, {b_, c_}, {0., -1.}] ->
  Text[labelx, {b, c + 3}, {0, -1}, {1, 0}];
g[[1, 2]] = g[[1, 2]] /.
  Text[a_, {b_, c_}, {0., -1.}] ->
  Text[a, {b, c + 3.78}, {0, 0}, {0, 1}];
g1 = Show[g,
  AspectRatio -> 1.05,
  PlotRange -> All,
  DisplayFunction -> Identity];

```

(\* Display Both Eigengenes & Fractions \*)

```

Show[GraphicsArray[{g1, g2}],
  GraphicsSpacing -> -0.15];

```

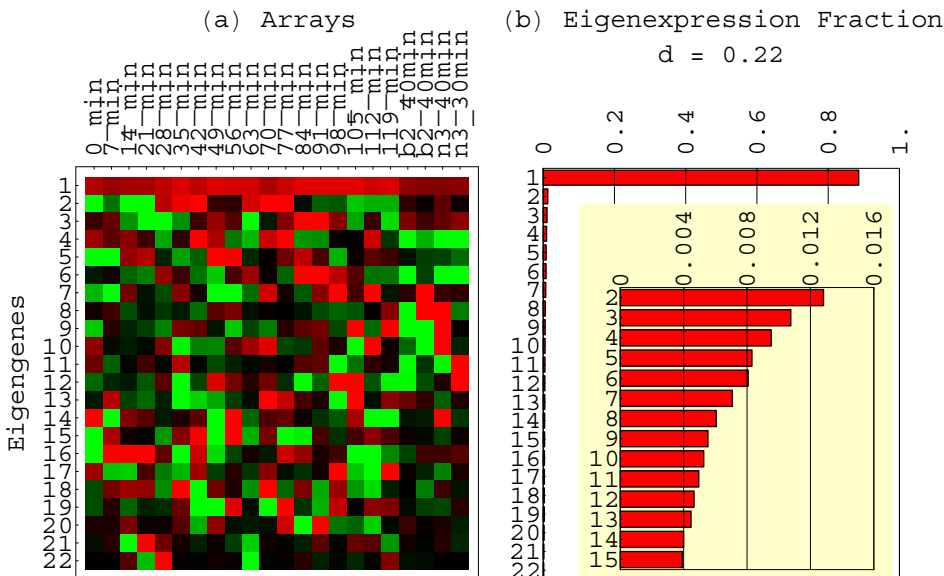

```
(* Reconstruct the Data Without Multiplicative Constant *)
```

```
eigenexpressions[[1]] = 0;  
normalization = Dot[eigenarrays, DiagonalMatrix[eigenexpressions], eigengenes];  
normalization = Sqrt[Exp[normalization]];  
matrix = Sign[matrix];  
matrix = N[matrix * normalization];  
Clear[normalization];
```

```
(* Examine Normalized Data *)
```

```
(* Calculate Singular Value Decomposition *)
```

```
correlation = Dot[Transpose[matrix], matrix] / (arrays - 1);  
{eigenexpressions, eigengenes} = Eigensystem[correlation];  
eigenexpressions = Sqrt[(arrays - 1) * eigenexpressions];  
Clear[correlation];  
eigengenes[[2]] = -eigengenes[[2]];  
eigengenes[[3]] = -eigengenes[[3]];  
eigenarrays = Dot[eigengenes, Transpose[matrix]];  
Do[  
  eigenarrays[[a]] = eigenarrays[[a]] / eigenexpressions[[a]],  
  {a, 1, arrays}];  
eigenarrays = Transpose[eigenarrays];  
arraycorrelations = Dot[DiagonalMatrix[eigenexpressions], eigengenes];  
genecorrelations = Dot[eigenarrays, DiagonalMatrix[eigenexpressions]];  
genecorrelations = Transpose[genecorrelations];  
fractions = eigenexpressions^2 / Sum[eigenexpressions[[a]]^2, {a, 1, arrays}];  
entropy = -N[Sum[fractions[[a]] * Log[fractions[[a]]], {a, 1, arrays}] / Log[arrays];  
entropy = N[Round[100 * entropy] / 100]
```

```
0.62
```

```
(* Create Fractions Bar Charts Displays *)
```

```
fractions[[1]]
```

```
0.225307
```

```
limit = 0.25;
```

```

Clear[gridx, framex, framey, sizes];
gridx = Table[a, {a, 0, limit, N[limit/5]}];
framex = gridx;
sizes = Flatten[
  Table[
    Dimensions[
      Characters[
        ToString[framex[[a]]]
      ]], {a, 1, 6}]];
Do[
  Do[framex[[a]] = StringJoin[ToString[framex[[a]]], " ",
    {b, 1, size - sizes[[a]]},
    {a, 1, 6}];
  framex = Table[{gridx[[a]], framex[[a]]}, {a, 1, 6}];
  framey = Table[{a + 1, arrays - a}, {a, 0, arrays - 1}];
  labelx = ColumnForm[
    {"(b) Eigenexpression Fraction", StringJoin["d = ", ToString[entropy]], " "}, Center];
g = BarChart[
  Table[fractions[[arrays - a]], {a, 0, arrays - 1}],
  BarOrientation -> Horizontal,
  PlotRange -> {{0, limit * 1.0001}, {0.5, arrays + 0.5}},
  AspectRatio -> 1,
  Axes -> False,
  Frame -> True,
  FrameTicks -> {None, framey, framex, None},
  FrameLabel -> {None, None, labelx, None},
  GridLines -> {gridx, None},
  DisplayFunction -> Identity];
g = FullGraphics[g];
g[[1, 2]] = g[[1, 2]] /.
  Text[labelx, {b_, c_}, {0., -1.}] ->
  Text[labelx, {b, c + 3}, {0, -1}, {1, 0}];
g[[1, 2]] = g[[1, 2]] /.
  Text[a_, {b_, c_}, {0., -1.}] ->
  Text[a, {b, c + 3.78}, {0, 0}, {0, 1}];
g2 = Show[g,
  AspectRatio -> 1.35,
  PlotRange -> All,
  DisplayFunction -> Identity];

```

(\* Create Eigengenes 2 D Red & Green Raster Display \*)

```

contrast = 3.5;
displaying = Table[
  If[contrast * eigengenes[[i, j]] > 0,
    If[contrast * eigengenes[[i, j]] < 1, {contrast * eigengenes[[i, j]], 0}, {1, 0}],
    If[contrast * eigengenes[[i, j]] > -1, {0, -contrast * eigengenes[[i, j]]}, {0, 1}]],
  {i, 1, arrays}, {j, 1, arrays}];
framex = Table[{a - 0.5, arraynames[[2, a]]}, {a, 1, arrays}];
framey = Table[{a + 1 - 0.5, arrays - a}, {a, 0, arrays - 1}];
labely = "Eigengenes";
labelx = ColumnForm[{"(a) Arrays", " ", " "}, Center];
g = Show[
  Graphics[
    RasterArray[
      Table[
        RGBColor[
          displaying[[i, j, 1]], displaying[[i, j, 2]], 0
        ], {i, arrays, 1, -1}, {j, 1, arrays}]]],
  AspectRatio -> 1,
  Frame -> True,
  FrameTicks -> {None, framey, framex, None},
  FrameLabel -> {None, labely, labelx, None},
  DisplayFunction -> Identity];
g = FullGraphics[g];
g[[1, 2]] = g[[1, 2]] /.
  Text[labely, {b_, c_}, {1., 0.}] ->
  Text[labely, {b - 3, c}, {0, 0}, {0, 1}];
g[[1, 2]] = g[[1, 2]] /.
  Text[labelx, {b_, c_}, {0., -1.}] ->
  Text[labelx, {b, c + 3}, {0, -1}, {1, 0}];
g[[1, 2]] = g[[1, 2]] /.
  Text[a_, {b_, c_}, {0., -1.}] ->
  Text[a, {b, c + 3.78}, {0, 0}, {0, 1}];
g1 = Show[g,
  AspectRatio -> 1.05,
  PlotRange -> All,
  DisplayFunction -> Identity];

```

(\* Create Selected Eigengenes Graph Display \*)

```

eigengenes1 = Chop[TrigFit[Drop[Drop[eigengenes[[1]], {19, 22}], {1}], 2, {x - 1, arrays - 5}], 0.1]
eigengenes2 = Chop[TrigFit[Drop[Drop[eigengenes[[2]], {19, 22}], {1}], 2, {x - 1, arrays - 5}], 0.1]
eigengenes3 = Chop[TrigFit[Drop[Drop[eigengenes[[3]], {19, 22}], {1}], 2, {x - 1, arrays - 5}], 0.1]

0.156573 Sin[ $\frac{2}{17} \pi (-1 + x)$ ] + 0.245919 Sin[ $\frac{4}{17} \pi (-1 + x)$ ]

0.268897 Cos[ $\frac{4}{17} \pi (-1 + x)$ ] - 0.101226 Sin[ $\frac{2}{17} \pi (-1 + x)$ ]

-0.112311 Cos[ $\frac{4}{17} \pi (-1 + x)$ ] - 0.237957 Sin[ $\frac{2}{17} \pi (-1 + x)$ ] + 0.164016 Sin[ $\frac{4}{17} \pi (-1 + x)$ ]

eigengenes1 = 0.34 * Sin[4 * Pi * (x - 1) / 17] + 0.24 * Sin[2 * Pi * (x - 1) / 17];
eigengenes2 = 0.34 * Cos[4 * Pi * (x - 1) / 17] - 0.24 * Sin[2 * Pi * (x - 1) / 17];
eigengenes3 = 0.34 * Sin[4 * Pi * (x - 1) / 17 - Pi / 4] - 0.24 * Sin[2 * Pi * (x - 1) / 17];

```



```

graph = Plot[
  eigengenes1,
  {x, 1, arrays - 5},
  PlotStyle -> {RGBColor[1, 0, 0], Dashing[{0.03, 0.02}]},
  DisplayFunction -> Identity];
labelx = ColumnForm[{"(c) Arrays"}, Center];
labely = ColumnForm[{" ", "Expression Level"}, Center];
framex = Table[{a - 1, arraynames[[2, a]]}, {a, 1, arrays}];
framey = {-1, -0.5, 0, 0.5, 1};
coordinates = Table[{a - 1, eigengenes[[1, a]]}, {a, 1, arrays}];
points = Table[Point[coordinates[[a]]], {a, 1, arrays}];
line = Line[coordinates];
g = Show[
  {Graphics[{RGBColor[1, 0, 0], PointSize[0.022], points}],
  Graphics[{RGBColor[1, 0, 0], line}],
  graph},
  Frame -> True,
  FrameLabel -> {None, labely, labelx, None},
  GridLines -> {{{17.5, RGBColor[0, 0, 0]}, {19.5, RGBColor[0, 0, 0]}}, {{0, RGBColor[0, 0, 0]}}},
  FrameTicks -> {None, framey, framex, None},
  PlotRange -> {-1.05, 1.05},
  DisplayFunction -> Identity];
g = FullGraphics[g];
g[[1, 2]] = g[[1, 2]] /.
  Text[labely, {b_, c_}, {1., 0.}] ->
  Text[labely, {b - 5.4, c}, {0, 0}, {0, 1}];
g[[1, 2]] = g[[1, 2]] /.
  Text[labelx, {b_, c_}, {0., -1.}] ->
  Text[labelx, {b, c + 0.625}, {0, -1}, {1, 0}];
g[[1, 2]] = g[[1, 2]] /.
  Text[a_, {b_, c_}, {0., -1.}] ->
  Text[a, {b, c + 0.35}, {0, 0}, {0, 1}];
p1 = Show[g,
  AspectRatio -> 1.05,
  PlotRange -> All,
  DisplayFunction -> Identity];

```

```

graph = Plot[
  eigengenes2,
  {x, 1, arrays - 5},
  PlotStyle -> {RGBColor[0, 0, 1], Dashing[{0.03, 0.02}]},
  DisplayFunction -> Identity];
labelx = ColumnForm[{"(c) Arrays"}, Center];
labely = ColumnForm[{" ", "Expression Level"}, Center];
framex = Table[{a - 1, arraynames[[2, a]]}, {a, 1, arrays}];
framey = {-1, -0.5, 0, 0.5, 1};
coordinates = Table[{a - 1, eigengenes[[2, a]]}, {a, 1, arrays}];
points = Table[Point[coordinates[[a]]], {a, 1, arrays}];
line = Line[coordinates];
g = Show[
  {Graphics[{RGBColor[0, 0, 1], PointSize[0.022], points}],
  Graphics[{RGBColor[0, 0, 1], line}],
  graph},
  Frame -> True,
  FrameLabel -> {None, labely, labelx, None},
  GridLines -> {{{17.5, RGBColor[0, 0, 0]}, {19.5, RGBColor[0, 0, 0]}}, {{0, RGBColor[0, 0, 0]}}},
  FrameTicks -> {None, framey, framex, None},
  PlotRange -> {-1.05, 1.05},
  DisplayFunction -> Identity];
g = FullGraphics[g];
g[[1, 2]] = g[[1, 2]] /.
  Text[labely, {b_, c_}, {1., 0.}] ->
  Text[labely, {b - 5.4, c}, {0, 0}, {0, 1}];
g[[1, 2]] = g[[1, 2]] /.
  Text[labelx, {b_, c_}, {0., -1.}] ->
  Text[labelx, {b, c + 0.625}, {0, -1}, {1, 0}];
g[[1, 2]] = g[[1, 2]] /.
  Text[a_, {b_, c_}, {0., -1.}] ->
  Text[a, {b, c + 0.35}, {0, 0}, {0, 1}];
p2 = Show[g,
  AspectRatio -> 1.05,
  PlotRange -> All,
  DisplayFunction -> Identity];

```

```

graph = Plot[
  eigengenes3,
  {x, 1, arrays - 5},
  PlotStyle -> {RGBColor[0, 0.5, 0], Dashing[{0.03, 0.02}]},
  DisplayFunction -> Identity];
labelx = ColumnForm[{"(c) Arrays"}, Center];
labely = ColumnForm[{" ", "Expression Level"}, Center];
framex = Table[{a - 1, arraynames[[2, a]]}, {a, 1, arrays}];
framey = {-1, -0.5, 0, 0.5, 1};
coordinates = Table[{a - 1, eigengenes[[3, a]]}, {a, 1, arrays}];
points = Table[Point[coordinates[[a]]], {a, 1, arrays}];
line = Line[coordinates];
g = Show[
  {Graphics[{RGBColor[0, 0.5, 0], PointSize[0.022], points}],
  Graphics[{RGBColor[0, 0.5, 0], line}],
  graph},
  Frame -> True,
  FrameLabel -> {None, labely, labelx, None},
  GridLines -> {{{17.5, RGBColor[0, 0, 0]}, {19.5, RGBColor[0, 0, 0]}}, {{0, RGBColor[0, 0, 0]}}},
  FrameTicks -> {None, framey, framex, None},
  PlotRange -> {-1.05, 1.05},
  DisplayFunction -> Identity];
g = FullGraphics[g];
g[[1, 2]] = g[[1, 2]] /.
  Text[labely, {b_, c_}, {1., 0.}] ->
  Text[labely, {b - 5.4, c}, {0, 0}, {0, 1}];
g[[1, 2]] = g[[1, 2]] /.
  Text[labelx, {b_, c_}, {0., -1.}] ->
  Text[labelx, {b, c + 0.625}, {0, -1}, {1, 0}];
g[[1, 2]] = g[[1, 2]] /.
  Text[a_, {b_, c_}, {0., -1.}] ->
  Text[a, {b, c + 0.35}, {0, 0}, {0, 1}];
p3 = Show[g,
  AspectRatio -> 1.05,
  PlotRange -> All,
  DisplayFunction -> Identity];

(* Display Selected Eigengenes *)

g3 = Show[{p3, p2, p1},
  DisplayFunction -> Identity];

```

(\* Display Eigengenes, Fractions, Selected Eigengenes and Formulas \*)

```
Show[GraphicsArray[{g1, g2, g3}],
GraphicsSpacing -> -0.15];
```

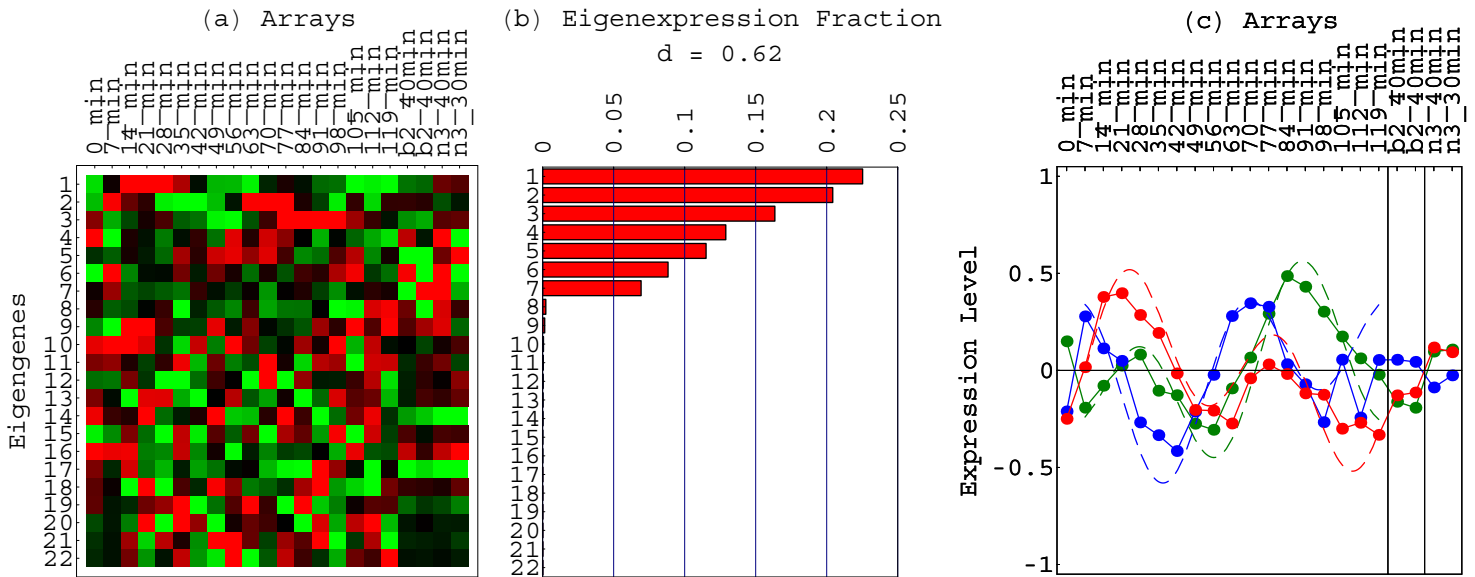

```
Show[
```

```
{Graphics[{RGBColor[1, 0, 0], Text["  $\sqrt{\frac{2}{T}} \sin\left(\frac{4\pi t}{T}\right) + \sqrt{\frac{1}{T}} \sin\left(\frac{2\pi t}{T}\right)$ ", {605, 1}]}],
```

```
Graphics[{RGBColor[0, 0, 1], Text["  $\sqrt{\frac{2}{T}} \cos\left(\frac{4\pi t}{T}\right) - \sqrt{\frac{1}{T}} \sin\left(\frac{2\pi t}{T}\right)$ ", {605, 0}]}],
```

```
Graphics[{RGBColor[0, 0.5, 0], Text["  $\sqrt{\frac{2}{T}} \sin\left(\frac{4\pi t}{T} - \frac{\pi}{4}\right) - \sqrt{\frac{1}{T}} \sin\left(\frac{2\pi t}{T}\right)$ ", {605, -1}]}],
```

```
AspectRatio -> 120 / 750,
```

```
PlotRange -> {{0, 750}, {-1.55, 1.55}}];
```

$$\begin{aligned} & \sqrt{\frac{2}{T}} \sin\left(\frac{4\pi t}{T}\right) + \sqrt{\frac{1}{T}} \sin\left(\frac{2\pi t}{T}\right) \\ & \sqrt{\frac{2}{T}} \cos\left(\frac{4\pi t}{T}\right) - \sqrt{\frac{1}{T}} \sin\left(\frac{2\pi t}{T}\right) \\ & \sqrt{\frac{2}{T}} \sin\left(\frac{4\pi t}{T} - \frac{\pi}{4}\right) - \sqrt{\frac{1}{T}} \sin\left(\frac{2\pi t}{T}\right) \end{aligned}$$

(\* Rotate Eigenenes & Eigenarrays in Degenerate Subspace \*)

(\* Degenerate Subspace Assumption \*)

```
eigenexpression = Sqrt[eigenexpressions[[1]]^2 + eigenexpressions[[2]]^2 + eigenexpressions[[3]]^2] /  
  Sqrt[3];  
eigenexpressions[[1]] = eigenexpression;  
eigenexpressions[[2]] = eigenexpression;  
eigenexpressions[[3]] = eigenexpression;  
Clear[eigenexpression];
```

```
fractions = eigenexpressions^2 / Sum[eigenexpressions[[a]]^2, {a, 1, arrays}];
```

(\* First Rotation \*)

```
eigenarrays = Transpose[eigenarrays];
```

```
Clear[x];  
x = x /. NSolve[  
  (x * eigengenes[[2, 20]] + Sqrt[1 - x^2] * eigengenes[[1, 20]]) -  
  (x * eigengenes[[2, 21]] + Sqrt[1 - x^2] * eigengenes[[1, 21]]) == 0, x][[1]]
```

0.869386

```
eigengenes1 = Table[eigengenes[[1, a]], {a, 1, arrays}];  
eigengenes2 = Table[eigengenes[[2, a]], {a, 1, arrays}];  
eigengenes[[2]] = x * eigengenes2 + Sqrt[1 - x^2] * eigengenes1;  
eigengenes[[1]] = -Sqrt[1 - x^2] * eigengenes2 + x * eigengenes1;  
Clear[eigengenes1, eigengenes2];  
eigenarrays1 = Table[eigenarrays[[1, a]], {a, 1, genes}];  
eigenarrays2 = Table[eigenarrays[[2, a]], {a, 1, genes}];  
eigenarrays[[2]] = x * eigenarrays2 + Sqrt[1 - x^2] * eigenarrays1;  
eigenarrays[[1]] = -Sqrt[1 - x^2] * eigenarrays2 + x * eigenarrays1;  
Clear[x, eigenarrays1, eigenarrays2];
```

(\* Second Rotation \*)

```
Clear[x];  
x = x /. NSolve[  
  (x * eigengenes[[1, 20]] + Sqrt[1 - x^2] * eigengenes[[3, 20]]) -  
  (x * eigengenes[[1, 21]] + Sqrt[1 - x^2] * eigengenes[[3, 21]]) == 0, x][[1]]
```

-0.735103

```
eigengenes1 = Table[eigengenes[[1, a]], {a, 1, arrays}];  
eigengenes3 = Table[eigengenes[[3, a]], {a, 1, arrays}];  
eigengenes[[1]] = -Sqrt[1 - x^2] * eigengenes1 + x * eigengenes3;  
eigengenes[[3]] = -x * eigengenes1 - Sqrt[1 - x^2] * eigengenes3;  
Clear[eigengenes1, eigengenes3];  
eigenarrays1 = Table[eigenarrays[[1, a]], {a, 1, genes}];  
eigenarrays3 = Table[eigenarrays[[3, a]], {a, 1, genes}];  
eigenarrays[[1]] = -Sqrt[1 - x^2] * eigenarrays1 + x * eigenarrays3;  
eigenarrays[[3]] = -x * eigenarrays1 - Sqrt[1 - x^2] * eigenarrays3;  
Clear[x, eigenarrays1, eigenarrays3];
```

```
eigenarrays = Transpose[eigenarrays];
```

(\* Create Fractions Bar Charts Displays \*)

```
fractions[[1]]
0.197696

limit = 0.25;

Clear[gridx, framex, framey, sizes];
gridx = Table[a, {a, 0, limit, N[limit/5]};
framex = gridx;
sizes = Flatten[
  Table[
    Dimensions[
      Characters[
        ToString[framex[[a]]
      ]], {a, 1, 6}]]];
Do[
  Do[framex[[a]] = StringJoin[ToString[framex[[a]]], " "],
    {b, 1, size - sizes[[a]]},
    {a, 1, 6}];
framex = Table[{gridx[[a]], framex[[a]]}, {a, 1, 6}];
framey = Table[{a + 1, arrays - a}, {a, 0, arrays - 1}];
labelx = ColumnForm[
  {"(b) Eigenexpression Fraction", StringJoin["d = ", ToString[entropy]], " "}, Center];
g = BarChart[
  Table[fractions[[arrays - a]], {a, 0, arrays - 1}],
  BarOrientation -> Horizontal,
  PlotRange -> {{0, limit * 1.0001}, {0.5, arrays + 0.5}},
  AspectRatio -> 1,
  Axes -> False,
  Frame -> True,
  FrameTicks -> {None, framey, framex, None},
  FrameLabel -> {None, None, labelx, None},
  GridLines -> {gridx, None},
  DisplayFunction -> Identity];
g = FullGraphics[g];
g[[1, 2]] = g[[1, 2]] /.
  Text[labelx, {b_, c_}, {0., -1.}] ->
  Text[labelx, {b, c + 3}, {0, -1}, {1, 0}];
g[[1, 2]] = g[[1, 2]] /.
  Text[a_, {b_, c_}, {0., -1.}] ->
  Text[a, {b, c + 3.78}, {0, 0}, {0, 1}];
g2 = Show[g,
  AspectRatio -> 1.35,
  PlotRange -> All,
  DisplayFunction -> Identity];
```

(\* Create Eigengenes 2 D Red & Green Raster Display \*)

```

contrast = 3.5;
displaying = Table[
  If[contrast * eigengenes[[i, j]] > 0,
    If[contrast * eigengenes[[i, j]] < 1, {contrast * eigengenes[[i, j]], 0}, {1, 0}],
    If[contrast * eigengenes[[i, j]] > -1, {0, -contrast * eigengenes[[i, j]]}, {0, 1}]],
  {i, 1, arrays}, {j, 1, arrays}];
framex = Table[{a - 0.5, arraynames[[2, a]]}, {a, 1, arrays}];
framey = Table[{a + 1 - 0.5, arrays - a}, {a, 0, arrays - 1}];
labely = "Eigengenes";
labelx = ColumnForm[{"(a) Arrays", " ", " "}, Center];
g = Show[
  Graphics[
    RasterArray[
      Table[
        RGBColor[
          displaying[[i, j, 1]], displaying[[i, j, 2]], 0
        ], {i, arrays, 1, -1}, {j, 1, arrays}]]],
  AspectRatio -> 1,
  Frame -> True,
  FrameTicks -> {None, framey, framex, None},
  FrameLabel -> {None, labely, labelx, None},
  DisplayFunction -> Identity];
g = FullGraphics[g];
g[[1, 2]] = g[[1, 2]] /.
  Text[labely, {b_, c_}, {1., 0.}] ->
  Text[labely, {b - 3, c}, {0, 0}, {0, 1}];
g[[1, 2]] = g[[1, 2]] /.
  Text[labelx, {b_, c_}, {0., -1.}] ->
  Text[labelx, {b, c + 3}, {0, -1}, {1, 0}];
g[[1, 2]] = g[[1, 2]] /.
  Text[a_, {b_, c_}, {0., -1.}] ->
  Text[a, {b, c + 3.78}, {0, 0}, {0, 1}];
g1 = Show[g,
  AspectRatio -> 1.05,
  PlotRange -> All,
  DisplayFunction -> Identity];

```

(\* Create Selected Eigengenes Graph Display \*)

```

eigengenes1 = Chop[TrigFit[Drop[Drop[eigengenes[[1]], {19, 22}], {1}], 2, {x - 1, arrays - 5}], 0.1]
eigengenes2 = Chop[TrigFit[Drop[Drop[eigengenes[[2]], {19, 22}], {1}], 2, {x - 1, arrays - 5}], 0.1]
eigengenes3 = Chop[TrigFit[Drop[Drop[eigengenes[[3]], {19, 22}], {1}], 2, {x - 1, arrays - 5}], 0.1]

0.18596 Cos[ $\frac{4}{17} \pi (-1 + x)$ ] - 0.233424 Sin[ $\frac{4}{17} \pi (-1 + x)$ ]

0.22261 Cos[ $\frac{4}{17} \pi (-1 + x)$ ] + 0.204797 Sin[ $\frac{4}{17} \pi (-1 + x)$ ]

0.100832 Cos[ $\frac{2}{17} \pi (-1 + x)$ ] + 0.298157 Sin[ $\frac{2}{17} \pi (-1 + x)$ ]

eigengenes1 = 0.34 * Cos[4 * Pi * (x - 1) / 17 + Pi / 4];
eigengenes2 = 0.34 * Sin[4 * Pi * (x - 1) / 17 + Pi / 4];
eigengenes3 = 0.34 * Sin[2 * Pi * (x - 1) / 17 + Pi / 8];

```

```

graph = Plot[
  eigengenes1,
  {x, 1, arrays - 5},
  PlotStyle -> {RGBColor[1, 0, 0], Dashing[{0.03, 0.02}]},
  DisplayFunction -> Identity];
labelx = ColumnForm[{"(c) Arrays"}, Center];
labeledy = ColumnForm[{"", "Expression Level"}, Center];
framex = Table[{a - 1, arraynames[[2, a]]}, {a, 1, arrays}];
framey = {-1, -0.5, 0, 0.5, 1};
coordinates = Table[{a - 1, eigengenes[[1, a]]}, {a, 1, arrays}];
points = Table[Point[coordinates[[a]]], {a, 1, arrays}];
line = Line[coordinates];
g = Show[
  {Graphics[{RGBColor[1, 0, 0], PointSize[0.022], points}],
  Graphics[{RGBColor[1, 0, 0], line}],
  graph,

  Graphics[{RGBColor[1, 0, 0], Text[" $\sqrt{\frac{2}{T}} \cos(\frac{4\pi t}{T} + \frac{\pi}{4})$ ", {8, 0.9}]}]},

  Frame -> True,
  FrameLabel -> {None, labeledy, labelx, None},
  GridLines -> {{{17.5, RGBColor[0, 0, 0]}, {19.5, RGBColor[0, 0, 0]}}, {{0, RGBColor[0, 0, 0]}},
  FrameTicks -> {None, framey, framex, None},
  PlotRange -> {-0.9, 1.2},
  DisplayFunction -> Identity];
g = FullGraphics[g];
g[[1, 2]] = g[[1, 2]] /.
  Text[labeledy, {b_, c_}, {1., 0.}] ->
  Text[labeledy, {b - 5.4, c}, {0, 0}, {0, 1}];
g[[1, 2]] = g[[1, 2]] /.
  Text[labelx, {b_, c_}, {0., -1.}] ->
  Text[labelx, {b, c + 0.625}, {0, -1}, {1, 0}];
g[[1, 2]] = g[[1, 2]] /.
  Text[a_, {b_, c_}, {0., -1.}] ->
  Text[a, {b, c + 0.35}, {0, 0}, {0, 1}];
p1 = Show[g,
  AspectRatio -> 1.05,
  PlotRange -> All,
  DisplayFunction -> Identity];

```



```

graph = Plot[
  eigengenes2,
  {x, 1, arrays - 5},
  PlotStyle -> {RGBColor[0, 0, 1], Dashing[{0.03, 0.02}]},
  DisplayFunction -> Identity];
labelx = ColumnForm[{"(c) Arrays"}, Center];
labeledy = ColumnForm[{"", "Expression Level"}, Center];
framex = Table[{a - 1, arraynames[[2, a]]}, {a, 1, arrays}];
framey = {-1, -0.5, 0, 0.5, 1};
coordinates = Table[{a - 1, eigengenes[[2, a]]}, {a, 1, arrays}];
points = Table[Point[coordinates[[a]]], {a, 1, arrays}];
line = Line[coordinates];
g = Show[
  {Graphics[{RGBColor[0, 0, 1], PointSize[0.022], points}],
  Graphics[{RGBColor[0, 0, 1], line}],
  graph,

  Graphics[{RGBColor[0, 0, 1], Text[" $\sqrt{\frac{2}{T}} \sin(\frac{4\pi t}{T} + \frac{\pi}{4})$ ", {8, -0.6}]}]},

  Frame -> True,
  FrameLabel -> {None, labeledy, labelx, None},
  GridLines -> {{{17.5, RGBColor[0, 0, 0]}, {19.5, RGBColor[0, 0, 0]}}, {{0, RGBColor[0, 0, 0]}},
  FrameTicks -> {None, framey, framex, None},
  PlotRange -> {-0.9, 1.2},
  DisplayFunction -> Identity];
g = FullGraphics[g];
g[[1, 2]] = g[[1, 2]] /.
  Text[labeledy, {b_, c_}, {1., 0.}] ->
  Text[labeledy, {b - 5.4, c}, {0, 0}, {0, 1}];
g[[1, 2]] = g[[1, 2]] /.
  Text[labelx, {b_, c_}, {0., -1.}] ->
  Text[labelx, {b, c + 0.625}, {0, -1}, {1, 0}];
g[[1, 2]] = g[[1, 2]] /.
  Text[a_, {b_, c_}, {0., -1.}] ->
  Text[a, {b, c + 0.35}, {0, 0}, {0, 1}];
p2 = Show[g,
  AspectRatio -> 1.05,
  PlotRange -> All,
  DisplayFunction -> Identity];

```

```

graph = Plot[
  eigengenes3,
  {x, 1, arrays - 5},
  PlotStyle -> {RGBColor[0, 0.5, 0], Dashing[{0.03, 0.02}]},
  DisplayFunction -> Identity];
labelx = ColumnForm[{"(c) Arrays"}, Center];
labeled = ColumnForm[{" ", "Expression Level"}, Center];
framex = Table[{a - 1, arraynames[[2, a]]}, {a, 1, arrays}];
framey = {-1, -0.5, 0, 0.5, 1};
coordinates = Table[{a - 1, eigengenes[[3, a]]}, {a, 1, arrays}];
points = Table[Point[coordinates[[a]]], {a, 1, arrays}];
line = Line[coordinates];
g = Show[
  {Graphics[{RGBColor[0, 0.5, 0], PointSize[0.022], points}],
  Graphics[{RGBColor[0, 0.5, 0], line}],
  graph,

  Graphics[{RGBColor[0, 0.5, 0], Text[" $\sqrt{\frac{2}{T}} \sin(\frac{2\pi t}{T} + \frac{\pi}{8})$ ", {8, 0.55}]}]},

  Frame -> True,
  FrameLabel -> {None, labeled, labelx, None},
  GridLines -> {{17.5, RGBColor[0, 0, 0]}, {19.5, RGBColor[0, 0, 0]}}, {{0, RGBColor[0, 0, 0]}},
  FrameTicks -> {None, framey, framex, None},
  PlotRange -> {-0.9, 1.2},
  DisplayFunction -> Identity];
g = FullGraphics[g];
g[[1, 2]] = g[[1, 2]] /.
  Text[labely, {b_, c_}, {1., 0.}] ->
  Text[labely, {b - 5.4, c}, {0, 0}, {0, 1}];
g[[1, 2]] = g[[1, 2]] /.
  Text[labelx, {b_, c_}, {0., -1.}] ->
  Text[labelx, {b, c + 0.625}, {0, -1}, {1, 0}];
g[[1, 2]] = g[[1, 2]] /.
  Text[a_, {b_, c_}, {0., -1.}] ->
  Text[a, {b, c + 0.35}, {0, 0}, {0, 1}];
p3 = Show[g,
  AspectRatio -> 1.05,
  PlotRange -> All,
  DisplayFunction -> Identity];

(* Display Selected Eigengenes *)

g3 = Show[{p3, p2, p1},
  DisplayFunction -> Identity];

```

(\* Display Eigengenes, Fractions and Selected Eigenenes \*)

```
Show[GraphicsArray[{g1, g2, g3}],
GraphicsSpacing -> -0.15];
```

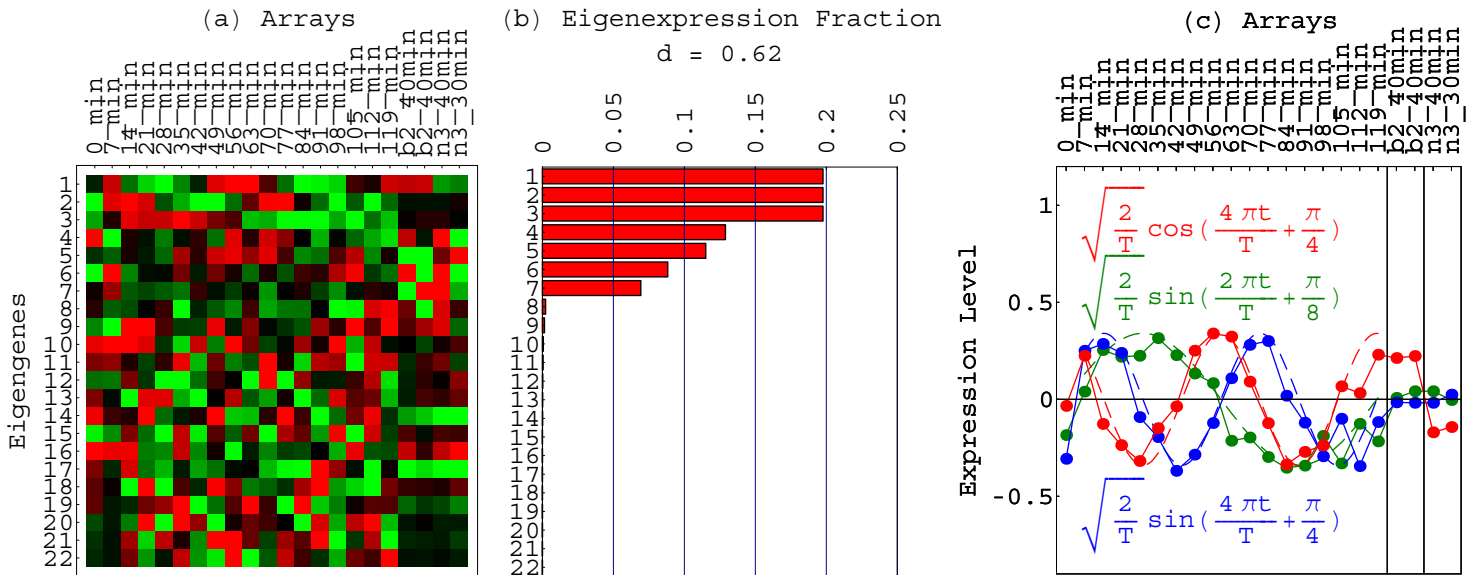

(\* Reconstruct Data With Rotated Eigengenes and Eigenarrays \*)

```
matrix = Dot[eigenarrays, DiagonalMatrix[eigenexpressions], eigengenes];
arraycorrelations = Dot[DiagonalMatrix[eigenexpressions], eigengenes];
genecorrelations = Dot[eigenarrays, DiagonalMatrix[eigenexpressions]];
```

(\* SVD Sort Yeast Arrays \*)

(\* Create Parameter Plot of Arrays According to Projections on Eigenarrays \*)

```
matrix = Transpose[matrix];
coordinates = Table[
  {arraycorrelations[[1, a]] / Sqrt[Dot[matrix[[a]], matrix[[a]]]},
  arraycorrelations[[2, a]] / Sqrt[Dot[matrix[[a]], matrix[[a]]]}],
  {a, 1, arrays}];
matrix = Transpose[matrix];
points1 = {Point[coordinates[[2]], Point[coordinates[[11]]]};
points2 = {Point[coordinates[[3]], Point[coordinates[[4]], Point[coordinates[[5]],
  Point[coordinates[[12]], Point[coordinates[[13]], Point[coordinates[[14]],
  Point[coordinates[[21]], Point[coordinates[[22]]]};
points3 = {Point[coordinates[[6]], Point[coordinates[[15]]]};
points4 = {Point[coordinates[[7]]]};
points5 = {Point[coordinates[[1]], Point[coordinates[[8]], Point[coordinates[[9]],
  Point[coordinates[[10]], Point[coordinates[[16]], Point[coordinates[[17]],
  Point[coordinates[[18]], Point[coordinates[[19]], Point[coordinates[[20]]]};
textcoordinates = coordinates;
Do[textcoordinates[[a, 1]] = If[textcoordinates[[a, 1]] > 0,
  textcoordinates[[a, 1]] + 0.095, textcoordinates[[a, 1]] - 0.095],
  {a, 1, 9}];
Do[textcoordinates[[a, 1]] = If[textcoordinates[[a, 1]] > 0,
  textcoordinates[[a, 1]] + 0.12, textcoordinates[[a, 1]] - 0.12],
  {a, 10, arrays}];
```

```

textcoordinates[[9]] = textcoordinates[[9]] - {0.06, 0.12};
textcoordinates[[12]] = textcoordinates[[12]] + {0.12, -0.12};
textcoordinates[[13]] = textcoordinates[[13]] + {0, 0.04};
textcoordinates[[14]] = textcoordinates[[14]] - {-0.06, 0.12};
textcoordinates[[16]] = textcoordinates[[16]] - {0.12, 0.12};
textcoordinates[[18]] = textcoordinates[[18]] - {0.06, 0.12};
textcoordinates[[19]] = textcoordinates[[19]] - {0.12, -0.12};
textcoordinates[[20]] = textcoordinates[[20]] - {0.16, 0.12};
textcoordinates[[21]] = textcoordinates[[21]] - {-0.08, 0.12};
textcoordinates[[22]] = textcoordinates[[22]] + {0.14, 0.12};

texts = Table[Text[a, textcoordinates[[a]]], {a, 1, arrays}];
p = Show[{
  Graphics[{RGBColor[1, 1, 0], PointSize[0.035], points1}],
  Graphics[{RGBColor[0, 0.5, 0], PointSize[0.035], points2}],
  Graphics[{RGBColor[0, 0, 1], PointSize[0.035], points3}],
  Graphics[{RGBColor[1, 0, 0], PointSize[0.035], points4}],
  Graphics[{RGBColor[1, 0.5, 0], PointSize[0.035], points5}],
  Graphics[{RGBColor[1, 0.5, 0], Text["G2/M", {1.075, -0.52}]}],
  Graphics[{RGBColor[0, 0, 0], Text["M/G1", {0.9, 0.75}]}],
  Graphics[{RGBColor[1, 0, 0], Text["S/G2", {0.2, -1.12}]}],
  Graphics[{RGBColor[0, 0, 1], Text["S", {-0.95, -0.6}]}],
  Graphics[{RGBColor[0, 0.5, 0], Text["G1", {-0.8, 0.8}]}],
  Graphics[{RGBColor[0, 0, 0], Text["(a)", {-1.1, 1.15}]}],
  Graphics[{RGBColor[0, 0, 0], Text[" $\phi = \pi/2$ ", {0.2, 1.12}]}],
  Graphics[{RGBColor[0, 0, 0], Text[" $\phi = 0$ ", {1.12, 0.12}]}],
  Graphics[texts],
  Graphics[{RGBColor[0, 0, 0], Arrow[{1.1, -0.26}, {0.4, -0.04},
    HeadCenter -> 0.5, HeadLength -> 0.035, HeadWidth -> 0.75]}],
  Graphics[{RGBColor[0, 0, 0], Text["CLB2", {1.1, -0.34}]}],
  Graphics[{RGBColor[0, 0, 0], Arrow[{-1.1, 0.37}, {-0.3, 0},
    HeadCenter -> 0.5, HeadLength -> 0.035, HeadWidth -> 0.75]}],
  Graphics[{RGBColor[0, 0, 0], Text["CLN3", {-1.1, 0.44}]}],
  Graphics[{RGBColor[0, 0, 0], Dashing[{0.03, 0.02}], Circle[{0, 0}, 0.5, {0.*Pi, 2*Pi}]}],
  Graphics[{RGBColor[0, 0, 0], Dashing[{0.03, 0.02}], Circle[{0, 0}, 1]}],
  Graphics[{RGBColor[0, 0, 0], Arrow[{-1.25, 0}, {1.25, 0},
    HeadCenter -> 0.5, HeadLength -> 0.035, HeadWidth -> 0.75]}],
  Graphics[{RGBColor[0, 0, 0], Arrow[{0, -1.25}, {0, 1.25},
    HeadCenter -> 0.5, HeadLength -> 0.035, HeadWidth -> 0.75]}],
  Graphics[{RGBColor[0, 0, 0], Arrow[
    {0.2 * Cos[-0.05], 0.2 * Sin[-0.05]}, {0.2 * Cos[0], 0.2 * Sin[0]},
    HeadCenter -> 0.5, HeadLength -> 0.035, HeadWidth -> 0.75]}],
  Graphics[{RGBColor[0, 0, 0], Circle[{0, 0}, 0.2,
    {ArcTan[coordinates[[1, 2]] / coordinates[[1, 1]] - Pi, 0}]}],
  Graphics[{RGBColor[0, 0, 0], Arrow[{0, 0}, coordinates[[1]],
    HeadCenter -> 0.5, HeadLength -> 0.035, HeadWidth -> 0.75]}],
  Graphics[{RGBColor[0, 0, 0], Text["r", {-0.1, -0.3}]}],
  Graphics[{RGBColor[0, 0, 0], Text[" $\phi$ ", {0.075, -0.1}]}],
  AspectRatio -> 1,
  PlotRange -> {{-1.25, 1.25}, {-1.25, 1.25}},
  Frame -> True,
  FrameTicks -> False,
  FrameLabel -> {None, None, None, None},
  GridLines -> {{{0, RGBColor[0, 0, 0]}}, {{0, RGBColor[0, 0, 0]}},
  DisplayFunction -> Identity];
p = FullGraphics[p];
p[[1, 2]] = p[[1, 2]] /.
  Text[labely, {b_, c_}, {1., 0.}] ->
  Text[labely, {-1.18, 0}, {0, 0}, {0, 1}];
s1 = Show[p,
  AspectRatio -> 1.0,
  PlotRange -> All,
  DisplayFunction -> Identity];

```

(\* SVD Sort Yeast Genes \*)

(\* Create Parameter Plot of Genes According to Projections on Eigengenes \*)

```
coordinates = Table[
  {genecorrelations[[a, 1]] / Sqrt[Dot[matrix[[a]], matrix[[a]]]},
  {genecorrelations[[a, 2]] / Sqrt[Dot[matrix[[a]], matrix[[a]]]}],
  {a, 1, genes}];

stream = "Desktop/Networks/Data/Y_Classify.txt.nb";
list = ReadList[stream, Word, RecordLists -> True, NullWords -> True];
list = Drop[list, 1];
Clear[stream];
stages = {"M/G1", "G1", "S", "S/G2", "G2/M"};
points = {points1, points2, points3, points4, points5};
radii = {radii1, radii2, radii3, radii4, radii5};
Do[{
  position = Position[list, stages[[b]]],
  table = Table[list[[position[[a, 1]], 1]], {a, 1, Dimensions[position][[1]]},
  position = Table[Position[genenames, table[[a]]], {a, 1, Dimensions[table][[1]}],
  table = Flatten[Position[position, {}]],
  Do[
    position = Drop[position, {table[[a]], table[[a]]}],
    {a, Dimensions[table][[1]], 1, -1}],
  points[[b]] = Table[Point[coordinates[[position[[a, 1], 1]]], {a, 1, Dimensions[position][[1]]}],
  radii[[b]] = Table[
    Sqrt[coordinates[[position[[a, 1], 1], 1]]^2 + coordinates[[position[[a, 1], 1], 2]]^2],
    {a, 1, Dimensions[position][[1]]}],
  {b, 1, Dimensions[stages][[1]]}

Dimensions[points[[1]][[1]]
Dimensions[points[[2]][[1]]
Dimensions[points[[3]][[1]]
Dimensions[points[[4]][[1]]
Dimensions[points[[5]][[1]]

92

242

52

99

161

radii = Sort[Flatten[radii], OrderedQ[{{#1}, {#2}}] &];
N[Round[radii[[95]] * 100] / 100]
N[Round[radii[[96]] * 100] / 100]

0.49

0.5

(* 646 cell cycle genes, 92 in M/G1, 242 in G1, 52 in S, 99 in S/G2, 161 in G2/M. *)

(* 551 with more than 25 % of normalized expression in the cell cycle subspace. *)
```

```

clb2 = coordinates[[Position[genenames, "YPR119W"]][[1, 1]]];
cln3 = coordinates[[Position[genenames, "YAL040C"]][[1, 1]]];
p = Show[
  {Graphics[{RGBColor[1, 0.5, 0], PointSize[0.02], points[[5]]}],
  Graphics[{RGBColor[1, 1, 0], PointSize[0.02], points[[1]]}],
  Graphics[{RGBColor[1, 0, 0], PointSize[0.02], points[[4]]}],
  Graphics[{RGBColor[0, 0.5, 0], PointSize[0.02], points[[2]]}],
  Graphics[{RGBColor[0, 0, 1], PointSize[0.02], points[[3]]}],
  Graphics[{RGBColor[1, 0.5, 0], Text["G2/M", {1.075, -0.52}]}],
  Graphics[{RGBColor[0, 0, 0], Text["M/G1", {0.9, 0.75}]}],
  Graphics[{RGBColor[1, 0, 0], Text["S/G2", {0.2, -1.12}]}],
  Graphics[{RGBColor[0, 0, 1], Text["S", {-0.95, -0.6}]}],
  Graphics[{RGBColor[0, 0.5, 0], Text["G1", {-0.8, 0.8}]}],
  Graphics[{RGBColor[0, 0, 0], Text["(b)", {-1.1, 1.15}]}],
  Graphics[{RGBColor[0, 0, 0], Text[" $\phi=\pi/2$ ", {0.2, 1.12}]}],
  Graphics[{RGBColor[0, 0, 0], Text[" $\phi=0$ ", {1.12, 0.12}]}],
  Graphics[{RGBColor[1, 0.5, 0], PointSize[0.02], Point[clb2]}],
  Graphics[{RGBColor[0, 0, 0], Arrow[{1.1, -0.26}, clb2,
    HeadCenter -> 0.5, HeadLength -> 0.035, HeadWidth -> 0.75]}],
  Graphics[{RGBColor[0, 0, 0], Text["CLB2", {1.1, -0.34}]}],
  Graphics[{RGBColor[1, 1, 0], PointSize[0.02], Point[cln3]}],
  Graphics[{RGBColor[0, 0, 0], Arrow[{-1.1, 0.37}, cln3,
    HeadCenter -> 0.5, HeadLength -> 0.035, HeadWidth -> 0.75]}],
  Graphics[{RGBColor[0, 0, 0], Text["CLN3", {-1.1, 0.44}]}],
  Graphics[{RGBColor[0, 0, 0], Dashing[{0.03, 0.02}], Circle[{0, 0}, 0.5]}],
  Graphics[{RGBColor[0, 0, 0], Dashing[{0.03, 0.02}], Circle[{0, 0}, 1]}],
  Graphics[{RGBColor[0, 0, 0], Arrow[{-1.25, 0}, {1.25, 0},
    HeadCenter -> 0.5, HeadLength -> 0.035, HeadWidth -> 0.75]}],
  Graphics[{RGBColor[0, 0, 0], Arrow[{0, -1.25}, {0, 1.25},
    HeadCenter -> 0.5, HeadLength -> 0.035, HeadWidth -> 0.75]}]}],
  AspectRatio -> 1,
  PlotRange -> {{-1.25, 1.25}, {-1.25, 1.25}},
  Frame -> True,
  FrameTicks -> False,
  FrameLabel -> {None, None, None, None},
  GridLines -> {None, None},
  DisplayFunction -> Identity];
p = FullGraphics[p];
p[[1, 2]] = p[[1, 2]] /.
  Text[labely, {b_, c_}, {1., 0.}] ->
  Text[labely, {-1.18, 0}, {0, 0}, {0, 1}];
s2 = Show[p,
  AspectRatio -> 1.0,
  PlotRange -> All,
  DisplayFunction -> Identity];

```

(\* Create Plot of SVD Cell Cycle 2 D Subspace \*)

```

R[theta_] = {{Cos[theta], Sin[theta]}, {-Sin[theta], Cos[theta]}};
x = Transpose[{{0.4, 0}, {1.1, 0}, {0.75, 0.25}}];
polypoints[theta_] = Transpose[Dot[R[theta], x]];
p = Show[
  {Graphics[{RGBColor[1, 0.5, 0], Text["G2/M", {1.075, -0.52}]}],
    Graphics[{RGBColor[0, 0, 0], Text["M/G1", {0.9, 0.75}]}],
    Graphics[{RGBColor[1, 0, 0], Text["S/G2", {0.2, -1.12}]}],
    Graphics[{RGBColor[0, 0, 1], Text["S", {-0.95, -0.6}]}],
    Graphics[{RGBColor[0, 0.5, 0], Text["G1", {-0.8, 0.8}]}],
    Graphics[{RGBColor[0, 0, 0], Text["(c)", {-1.1, 1.15}]}],
    Graphics[{RGBColor[0, 0, 0], Text[" $\phi=\pi/2$ ", {0.2, 1.12}]}],
    Graphics[{RGBColor[0, 0, 0], Text[" $\phi=0$ ", {1.12, 0.12}]}],
    Graphics[{RGBColor[1, 0.5, 0], Disk[{0, 0}, 1, {-Pi/3, 0}]}],
    Graphics[{RGBColor[1, 1, 0], Disk[{0, 0}, 1, {0, Pi/2}]}],
    Graphics[{RGBColor[0, 0.5, 0], Disk[{0, 0}, 1, {Pi/2, Pi}]}],
    Graphics[{RGBColor[0, 0, 1], Disk[{0, 0}, 1, {Pi, 4*Pi/3}]}],
    Graphics[{RGBColor[1, 0, 0], Disk[{0, 0}, 1, {4*Pi/3, 5*Pi/3}]}],
    Graphics[{RGBColor[1, 1, 1], Disk[{0, 0}, 0.5]}],
    Graphics[{RGBColor[1, 0.5, 0], Polygon[polypoints[0]}],
    Graphics[{RGBColor[1, 1, 0], Polygon[polypoints[3*Pi/2]}],
    Graphics[{RGBColor[0, 0.5, 0], Polygon[polypoints[Pi]}],
    Graphics[{RGBColor[0, 0, 0], Arrow[{-1.25, 0}, {1.25, 0},
      HeadCenter -> 0.5, HeadLength -> 0.035, HeadWidth -> 0.75]}],
    Graphics[{RGBColor[0, 0, 0], Arrow[{0, -1.25}, {0, 1.25},
      HeadCenter -> 0.5, HeadLength -> 0.035, HeadWidth -> 0.75]}]},
  AspectRatio -> 1,
  PlotRange -> {{-1.25, 1.25}, {-1.25, 1.25}},
  Frame -> True,
  FrameTicks -> False,
  FrameLabel -> {None, None, None, None},
  GridLines -> {{{0, RGBColor[0, 0, 0]}}, {{0, RGBColor[0, 0, 0]}},
  DisplayFunction -> Identity];
p = FullGraphics[p];
p[[1, 2]] = p[[1, 2]] /.
  Text[labely, {b_, c_}, {1., 0.}] ->
  Text[labely, {-1.18, 0}, {0, 0}, {0, 1}];
s3 = Show[p,
  AspectRatio -> 1.,
  PlotRange -> All,
  DisplayFunction -> Identity];
Clear[x];

```

(\* Define the Initial Phase \*)

```
zerophase = Pi/2;
```

(\* Sort Genes by SVD Phase \*)

```
svdphase = Table[{
  genecorrelations[[a, 1]] / Sqrt[genecorrelations[[a, 1]]^2 + genecorrelations[[a, 2]]^2],
  genecorrelations[[a, 2]] / Sqrt[genecorrelations[[a, 1]]^2 + genecorrelations[[a, 2]]^2]},
{a, 1, genes}];
svdphase = Table[{
  -svdphase[[a, 1]] * Cos[zerophase] - svdphase[[a, 2]] * Sin[zerophase],
  -svdphase[[a, 2]] * Cos[zerophase] + svdphase[[a, 1]] * Sin[zerophase]},
{a, 1, genes}];
svdphase = Table[{
  svdphase[[a, 1]],
  svdphase[[a, 2]],
  N[ArcTan[svdphase[[a, 1]] / svdphase[[a, 2]]] / Pi}},
{a, 1, genes}];
sortmatrix = AppendRows[svdphase, genenames, matrix, eigenarrays, genecorrelations];
sortmatrix = Sort[sortmatrix, OrderedQ[{{#1}, {#2}}] &];
negative1 = 1913;
positive1 = 1914;
sortmatrix[[negative1, 1]]
sortmatrix[[positive1, 1]]
```

-0.000990132

0.000695258

```
sortmatrix = Transpose[Drop[Transpose[sortmatrix], {1}]];
sortmatrix = AppendColumns[
  Sort[
    TakeRows[sortmatrix, {1, negative1}],
    OrderedQ[{{#2}, {#1}}] &],
  Sort[
    TakeRows[sortmatrix, {positive1, genes}],
    OrderedQ[{{#1}, {#2}}] &];
phases = TakeColumns[sortmatrix, {2, 2}];
svdphases = phases;
sortmatrix = Transpose[Drop[Transpose[sortmatrix], {1, 2}]];
```

(\* Reconstruct Data With Sorted Genes \*)

```
genenames2 = TakeColumns[sortmatrix, {1, 6}];
matrix2 = TakeColumns[sortmatrix, {7, arrays + 6}];
eigenarrays = TakeColumns[sortmatrix, {arrays + 7, 2 * arrays + 6}];
genecorrelations = TakeColumns[sortmatrix, {2 * arrays + 7, 3 * arrays + 6}];
```



(\* Classify SVD Gene Phases into Cell Cycle Phases \*)

```
ph1 = 0;  
ph2 = -1 / 2.;  
ph3 = -1.;  
ph4 = -4 / 3.;  
ph5 = -5 / 3.;
```

```
endph5 = genes;  
beginph1 = 1;  
phases[[endph5]] - ph1  
phases[[beginph1]] - ph1
```

{0.000221307}

{-0.000315169}

```
endph1 = 1020;  
beginph2 = 1021;  
phases[[endph1]] - ph2  
phases[[beginph2]] - ph2
```

{0.000187677}

{0.999788}

```
endph2 = 1913;  
beginph3 = 1914;  
phases[[endph2]] - ph3  
phases[[beginph3]] - ph3
```

{1.00101}

{0.999626}

```
endph3 = 2588;  
beginph4 = 2589;  
phases[[endph3]] - ph4  
phases[[beginph4]] - ph4
```

{1.00001}

{0.999872}

```
endph4 = 3699;  
beginph5 = 3700;  
phases[[endph4]] - ph5  
phases[[beginph5]] - ph5
```

{2.00032}

{1.99995}

(\* 4579 yeast genes, 1020 in M/G1, 893 in G1, 675 in S, 1111 in S/G2, 880 in G2/M. \*)

```
(* Display SVD Sorted and Reconstructed Yeast Data *)
```

```
matrix = matrix2;  
genes = genes2;  
genenames = genenames2;
```

```
(* Create Normalized Sorted Yeast Data 2 D Red & Green Raster Display *)
```

```
contrast = 10 * 1.5;  
displaying = Table[  
  If[contrast * matrix[[i, j]] > 0,  
    If[contrast * matrix[[i, j]] < 1, {contrast * matrix[[i, j]], 0}, {1, 0}],  
    If[contrast * matrix[[i, j]] > -1, {0, -contrast * matrix[[i, j]]}, {0, 1}]],  
  {i, 1, genes}, {j, 1, arrays}];  
framex = Table[{a - 0.5, arraynames[[2, a]]}, {a, 1, arrays}];  
framey = {  
  {genes - endph1 / 2, "M/G1"},  
  {genes - (endph1 + endph2) / 2, "G1"},  
  {genes - (endph2 + endph3) / 2, "S"},  
  {genes - (endph3 + endph4) / 2, "S/G2"},  
  {(genes - endph4) / 2, "G2/M"}}];  
gridy = {  
  {genes - endph1 + 0.5, {RGBColor[0, 0, 0]}},  
  {genes - endph2 + 0.5, {RGBColor[0, 0, 0]}},  
  {genes - endph3 + 0.5, {RGBColor[0, 0, 0]}},  
  {genes - endph4 + 0.5, {RGBColor[0, 0, 0]}}];  
labelx = "(a) Arrays";  
labely = ColumnForm[{" ", "Genes", " ", " ", " ", " ", " ", " ", " ", " "}, Center];  
g = Show[  
  Graphics[  
    RasterArray[  
      Table[  
        RGBColor[displaying[[i, j, 1]], displaying[[i, j, 2]], 0],  
        {i, genes, 1, -1}, {j, 1, arrays}]]],  
  AspectRatio -> 1,  
  Frame -> True,  
  FrameTicks -> {None, framey, framex, None},  
  FrameLabel -> {None, labely, labelx, None},  
  GridLines -> {None, gridy},  
  DisplayFunction -> Identity];
```

```

g = FullGraphics[g];
g[[1, 2]] = g[[1, 2]] /.
  Text[labely, {b_, c_}, {1., 0.}] →
  Text[labely, {b, c}, {0, 0}, {0, 1}];
g[[1, 2]] = g[[1, 2]] /.
  Text[a_, {b_, c_}, {1., 0.}] →
  Text[a, {b - 1.5, c}, {0, 0}, {0, 1}];
g[[1, 2]] = g[[1, 2]] /.
  Text[labelx, {b_, c_}, {0., -1.}] →
  Text[labelx, {b, c + 1100}, {0, -1}, {1, 0}];
g[[1, 2]] = g[[1, 2]] /.
  Text[a_, {b_, c_}, {0., -1.}] →
  Text[a, {b, c + 550}, {0, 0}, {0, 1}];
g1 = Show[g,
  AspectRatio -> GoldenRatio * 1.2,
  PlotRange -> All,
  DisplayFunction -> Identity];

(* Create Sorted Yeast Eigenarrays 2 D Red & Green Raster Display *)

```

```

contrast = 75 * 1.5;
displaying = Table[
  If[contrast * eigenarrays[[i, j]] > 0,
    If[contrast * eigenarrays[[i, j]] < 1, {contrast * eigenarrays[[i, j]], 0}, {1, 0}],
    If[contrast * eigenarrays[[i, j]] > -1, {0, -contrast * eigenarrays[[i, j]]}, {0, 1}]],
  {i, 1, genes}, {j, 1, arrays}];
labelx = "(b) Eigenarrays";
labely = ColumnForm[{" ", " ", " ", " ", " ", " ", " ", " ", " ", " ", " "}, Center];
framey = {
  {genes - endph5 / 2, " ", 0},
  {genes - (endph5 + endph1) / 2, " ", 0},
  {genes - (endph1 + endph2) / 2, " ", 0},
  {genes - (endph2 + endph3) / 2, " ", 0},
  {genes - (endph3 + endph4) / 2, " ", 0},
  {(genes - endph4) / 2, " ", 0}};
gridy = {
  {genes - endph1 + 0.5, {RGBColor[0, 0, 0]}},
  {genes - endph2 + 0.5, {RGBColor[0, 0, 0]}},
  {genes - endph3 + 0.5, {RGBColor[0, 0, 0]}},
  {genes - endph4 + 0.5, {RGBColor[0, 0, 0]}},
  {genes - endph5 + 0.5, {RGBColor[0, 0, 0]}}};
framex = Table[{a - 0.5, ToString[a]}, {a, 1, arrays}];
size = 7;
sizes = Flatten[
  Table[
    Dimensions[
      Characters[
        framex[[a, 2]]
      ]], {a, 1, arrays}]];
Do[
  Do[framex[[a, 2]] = StringJoin[framex[[a, 2]], " "],
    {b, 1, size - sizes[[a]]}],
  {a, 1, arrays}];

```

```

g = Show[
  Graphics[
    RasterArray[
      Table[
        RGBColor[displaying[[i, j, 1]], displaying[[i, j, 2]], 0],
        {i, genes, 1, -1}, {j, 1, arrays}
      ]],
    AspectRatio -> 1,
    Frame -> True,
    FrameTicks -> {None, framey, framex, None},
    FrameLabel -> {None, labely, labelx, None},
    GridLines -> {None, gridy},
    DisplayFunction -> Identity];
g = FullGraphics[g];
g[[1, 2]] = g[[1, 2]] /.
  Text[labely, {b_, c_}, {1., 0.}] ->
  Text[labely, {b, c}, {0, 0}, {0, 1}];
g[[1, 2]] = g[[1, 2]] /.
  Text[a_, {b_, c_}, {1., 0.}] ->
  Text[a, {b - 1.5, c}, {0, 0}, {0, 1}];
g[[1, 2]] = g[[1, 2]] /.
  Text[labelx, {b_, c_}, {0., -1.}] ->
  Text[labelx, {b, c + 1100}, {0, -1}, {1, 0}];
g[[1, 2]] = g[[1, 2]] /.
  Text[a_, {b_, c_}, {0., -1.}] ->
  Text[a, {b, c + 550}, {0, 0}, {0, 1}];
g2 = Show[g,
  AspectRatio -> GoldenRatio * 1.2,
  PlotRange -> All,
  DisplayFunction -> Identity];

```

(\* Create Selected Sorted Yeast Eigenarrays Graph Display \*)

```

eigenarrays = Transpose[eigenarrays];

eigenarrays1 = Chop[TrigFit[eigenarrays[[1]], 1, {x, genes - 1}], 0.0025]
eigenarrays2 = Chop[TrigFit[eigenarrays[[2]], 1, {x, genes - 1}], 0.003]

0.0183017 Cos[ $\frac{\pi x}{2289}$ ] - 0.00523107 Sin[ $\frac{\pi x}{2289}$ ]

0.00544666 Cos[ $\frac{\pi x}{2289}$ ] + 0.0181607 Sin[ $\frac{\pi x}{2289}$ ]

```

```

graph = ParametricPlot[{eigenarrays1, -x},
  {x, genes - 1, 0},
  PlotStyle -> {RGBColor[0, 0, 0.5]},
  DisplayFunction -> Identity];
labelx = "(c) Expression Level";
labely = ColumnForm[{" ", " ", " ", " ", " ", " ", " ", " ", " ", " "}, Center];
framex = {{-0.05, "-0.05"}, {-0.025, "-0.025"}, {0, "0"},
  {0.025, "0.025"}, {0.05, "0.05"}, {0.075, "0.075"}, {0.1, "0.1"}];
framey = {
  {-genes + endph5 / 2, " ", 0},
  {-genes + (endph5 + endph1) / 2, " ", 0},
  {-genes + (endph1 + endph2) / 2, " ", 0},
  {-genes + (endph2 + endph3) / 2, " ", 0},
  {-genes + (endph3 + endph4) / 2, " ", 0},
  {-(genes - endph4) / 2, " ", 0}};
coordinates = Table[{eigenarrays[[1, a]], -a + 1}, {a, 1, genes}];
line = Line[coordinates];
g = Show[{
  Graphics[{RGBColor[1, 0, 0], line}],
  graph,

  Graphics[{RGBColor[1, 0, 0], Text[" $\sqrt{\frac{2}{z}} \sin(\frac{2\pi z}{z} - \frac{\pi}{8})$ ", {0.054, -2750}]}]},
  Frame -> True,
  FrameLabel -> {None, labely, labelx, None},
  FrameTicks -> {None, None, framex, None},
  GridLines -> {{0, RGBColor[0, 0, 0]}}, None},
  AspectRatio -> GoldenRatio * 1.15,
  PlotRange -> {{-0.05, 0.105}, {75, -genes + 1 - 75}},
  DisplayFunction -> Identity];
g = FullGraphics[g];
g[[1, 2]] = g[[1, 2]] /.
  Text[labely, {b_, c_}, {1., 0.}] ->
  Text[labely, {b, c}, {0, 0}, {0, 1}];
g[[1, 2]] = g[[1, 2]] /.
  Text[a_, {b_, c_}, {1., 0.}] ->
  Text[a, {b - 0.01, c}, {0, 0}, {0, 1}];
g[[1, 2]] = g[[1, 2]] /.
  Text[labelx, {b_, c_}, {0., -1.}] ->
  Text[labelx, {b, c + 1125}, {0, -1}, {1, 0}];
g[[1, 2]] = g[[1, 2]] /.
  Text[a_, {b_, c_}, {0., -1.}] ->
  Text[a, {b, c + 575}, {0, 0}, {0, 1}];
p1 = Show[g,
  AspectRatio -> GoldenRatio * 1.2765,
  PlotRange -> All,
  DisplayFunction -> Identity];

```

```

graph = ParametricPlot[{eigenarrays2, -x},
  {x, genes - 1, 0},
  PlotStyle -> {RGBColor[0, 0, 0.5]},
  DisplayFunction -> Identity];
labelx = "(c) Expression Level";
labely = ColumnForm[{" ", " ", " ", " ", " ", " ", " ", " ", " ", " "}, Center];
framex = {{-0.05, "-0.05"}, {-0.025, "-0.025"}, {0, "0"},
  {0.025, "0.025"}, {0.05, "0.05"}, {0.075, "0.075"}, {0.1, "0.1"};
framey = {
  {-genes + endph5 / 2, " ", 0},
  {-genes + (endph5 + endph1) / 2, " ", 0},
  {-genes + (endph1 + endph2) / 2, " ", 0},
  {-genes + (endph2 + endph3) / 2, " ", 0},
  {-genes + (endph3 + endph4) / 2, " ", 0},
  {-(genes - endph4) / 2, " ", 0}};
coordinates = Table[{eigenarrays[[2, a]], -a + 1}, {a, 1, genes}];
line = Line[coordinates];
g = Show[{
  Graphics[{RGBColor[0, 0.5, 0], line}],
  graph,

  Graphics[{RGBColor[0, 0.5, 0], Text[" $\sqrt{\frac{2}{z}} \cos\left(\frac{2\pi z}{z} - \frac{\pi}{8}\right)$ ", {0.054, -3500}]}]},
  Frame -> True,
  FrameLabel -> {None, labely, labelx, None},
  FrameTicks -> {None, None, framex, None},
  GridLines -> {{{0, RGBColor[0, 0, 0]}}, None},
  AspectRatio -> GoldenRatio * 1.15,
  PlotRange -> {{-0.05, 0.105}, {75, -genes + 1 - 75}},
  DisplayFunction -> Identity];
g = FullGraphics[g];
g[[1, 2]] = g[[1, 2]] /.
  Text[labely, {b_, c_}, {1., 0.}] ->
  Text[labely, {b, c}, {0, 0}, {0, 1}];
g[[1, 2]] = g[[1, 2]] /.
  Text[a_, {b_, c_}, {1., 0.}] ->
  Text[a, {b - 0.01, c}, {0, 0}, {0, 1}];
g[[1, 2]] = g[[1, 2]] /.
  Text[labelx, {b_, c_}, {0., -1.}] ->
  Text[labelx, {b, c + 1125}, {0, -1}, {1, 0}];
g[[1, 2]] = g[[1, 2]] /.
  Text[a_, {b_, c_}, {0., -1.}] ->
  Text[a, {b, c + 575}, {0, 0}, {0, 1}];
p2 = Show[g,
  AspectRatio -> GoldenRatio * 1.2765,
  PlotRange -> All,
  DisplayFunction -> Identity];

(* Display Selected Sorted Yeast Arraylets *)

g3 = Show[{p1, p2},
  DisplayFunction -> Identity];

```

(\* Display Reconstructed Sorted Yeast Data, Arraylets and Selected Arraylets \*)

```
Show[GraphicsArray[{g1, g2, g3}],
GraphicsSpacing -> -0.15];
```

(a) Arrays

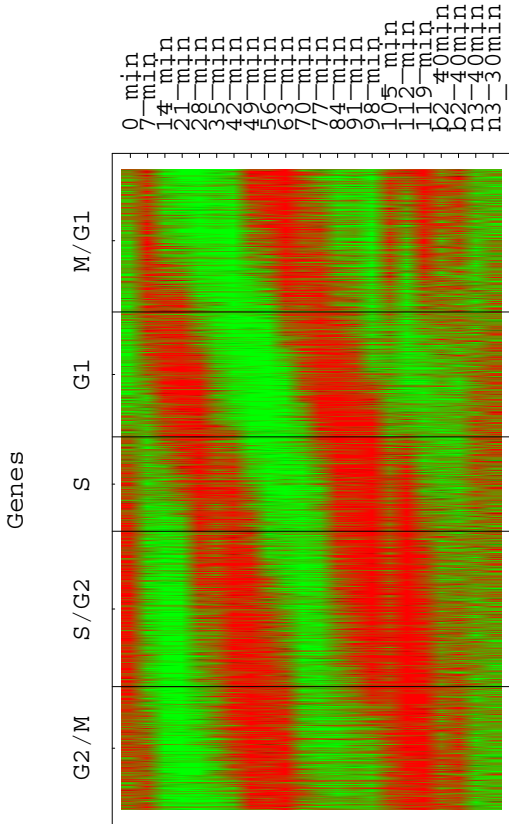

(b) Eigenarrays

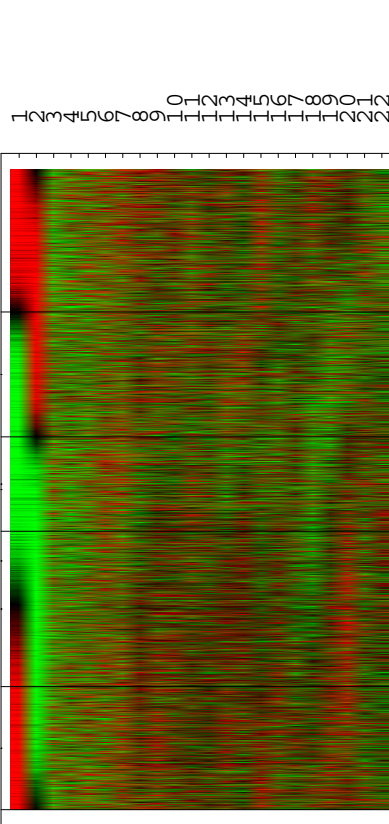

(c) Expression Level

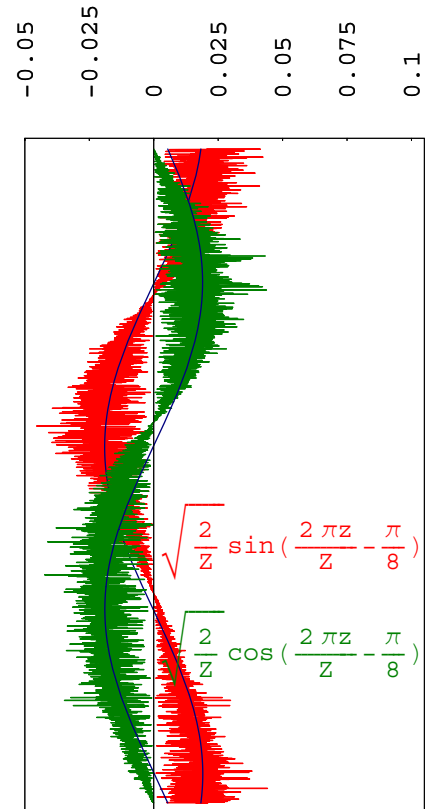

```
eigenarrays = Transpose[eigenarrays];
```

(\* Display SVD & GSVD Cell Cycle Subspaces Sorted Yeast Data \*)

```
Show[GraphicsArray[{{s1, s2, s3}, {s4, s5, s6}}],
GraphicsSpacing -> 0];
```

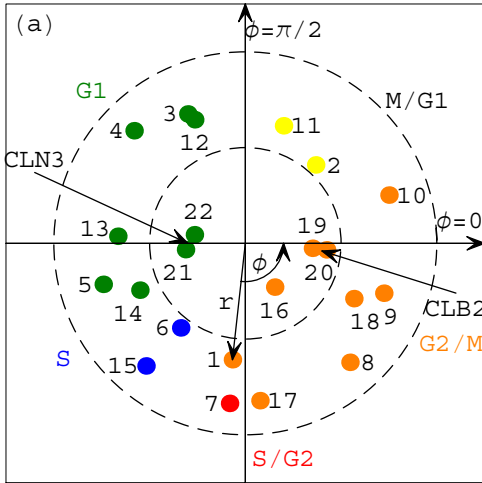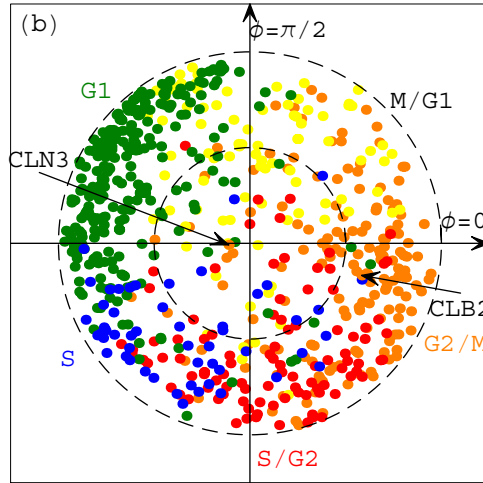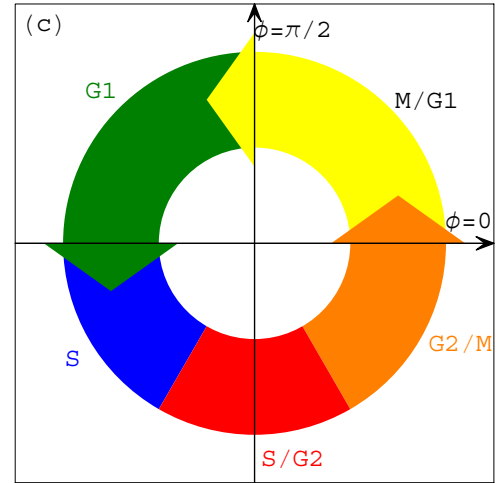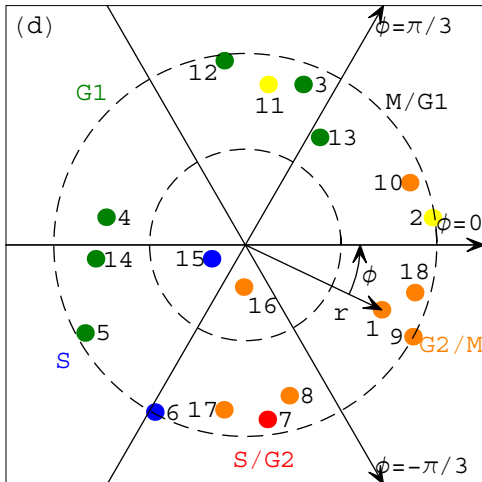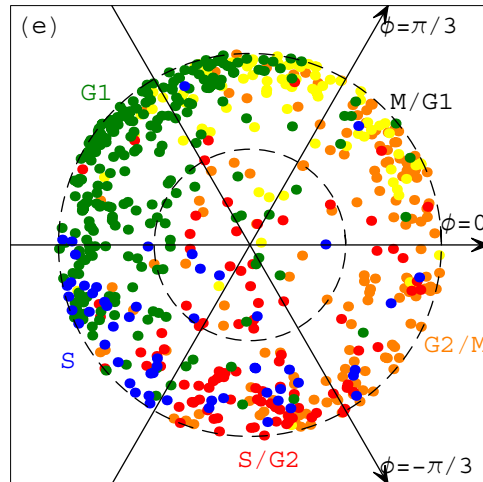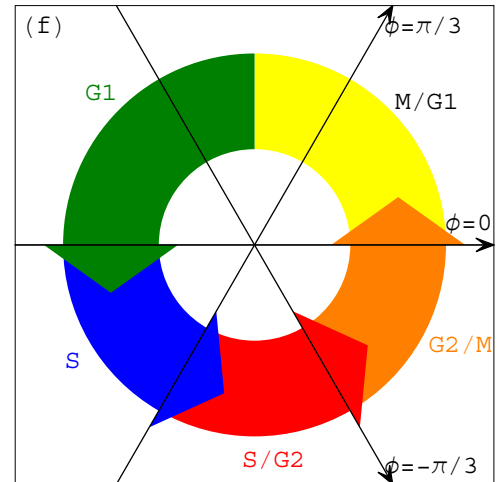

Supplement: pnas_101_47_16577__21.pdf [file pnas_101_47_16577__21.pdf]
