# Supplementary material
Source: PubMed Central journal article supplement (PMC534520)

```
(* © Orly Alter 2004 *)
```

```
(* All Rights Reserved *)
```

```
<< LinearAlgebra`MatrixManipulation`;  
<< NumericalMath`TrigFit`;  
<< Graphics`Graphics`;  
<< Graphics`Arrow`;  
Off[General::"spell"];  
Off[General::"spell1"];
```

```
(* Map Yeast Alpha Factor Cell Cycle Time Course Expression Data *)
```

```
(* Read Data *)
```

```
stream = "Desktop/Networks/Data/Alpha_Factor.txt.nb";  
externalmatrix = ReadList[stream, Word, RecordLists -> True, NullWords -> True];  
{externalgenes, externalarrays} = Dimensions[externalmatrix] - {2, 3}  
Clear[stream];  
  
{4636, 18}  
  
externalgenenames = TakeRows[  
  TakeColumns[externalmatrix, {1, 3}],  
  {3, externalgenes + 2}];  
externalarraynames = TakeColumns[  
  TakeRows[externalmatrix, {1, 2}],  
  {4, externalarrays + 3}];  
externalmatrix = TakeColumns[  
  TakeRows[externalmatrix, {3, externalgenes + 2}],  
  {4, externalarrays + 3}];  
externalmatrix = ToExpression[externalmatrix];  
  
sizes = Flatten[  
  Table[  
    Dimensions[  
      Characters[  
        ToString[externalarraynames[[2, a]]  
        ]],  
    {a, 1, externalarrays}]];  
size = Sort[sizes, OrderedQ[{{#2, #1}} &]][[1]];  
Do[  
  Do[externalarraynames[[2, a]] = StringJoin[ToString[externalarraynames[[2, a]]], " "],  
    {b, 1, size - sizes[[a]]},  
    {a, 1, externalarrays}];  
  
(* Display Sorted External Arrays *)  
  
arraypatterns = Transpose[externalmatrix];  
  
(* Center External Arrays *)  
  
average = Table[1, {a, 1, externalgenes}];  
average = N[average / Sqrt[Dot[average, average]]];  
arraypatterns = arraypatterns - N[Outer[Times, Dot[arraypatterns, average], average]];
```

```
(* Normalize External Arrays *)
```

```
Do[  
  arraypatterns[[a]] =  
    arraypatterns[[a]] / Sqrt[Dot[arraypatterns[[a]], arraypatterns[[a]]],  
  {a, 1, externalarrays}]
```

```
(* Sort External Arrays *)
```

```
Do[  
  arraypatterns[[a]] = Sort[arraypatterns[[a]], OrderedQ[{{#2}, {#1}}] &],  
  {a, 1, externalarrays}]
```

```
(* Create Sorted External Arrays Graph Display *)
```

```
p = Table[0, {a, 1, externalarrays}];  
color = {  
  RGBColor[0.75, 0, 1],  
  RGBColor[1, 0, 0],  
  RGBColor[1, 0.5, 0],  
  RGBColor[0, 0.5, 0],  
  RGBColor[0, 0, 1]};  
labelx = "Expression Level";  
labely = ColumnForm[  
  {" ", "Number of Genes", " ", " ", " ", " ", " ", " ", " ", " ", " ", " "},  
  Center];  
framex = Table[{0.02 * a, externalarraynames[[2, a]]},  
  {a, 1, externalarrays}];  
framey = {{-200, "200"}, {-2250, "2250"}, {-externalgenes + 200, "4436"}};
```

```
Do[{  
  coordinates = Table[  
    If[arraypatterns[[n, a]] + 0.02 * n < -0.02, -0.02,  
    If[arraypatterns[[n, a]] + 0.02 * n > 0.4, 0.4,  
    arraypatterns[[n, a]] + 0.02 * n],  
    {a, 1, externalgenes}],  
  coordinates = Table[{coordinates[[a]], -a + 1}, {a, 1, externalgenes}],  
  line = Line[coordinates],  
  g = Show[  
    Graphics[{color[[Mod[n, 5] + 1]], line}],  
    Frame -> True,  
    FrameLabel -> {None, labely, labelx, None},  
    FrameTicks -> {None, framey, framex, None},  
    GridLines -> {{{0.02 * n, RGBColor[0, 0, 0]}}, {{-200, RGBColor[0, 0, 0]},  
      {-2250, RGBColor[0, 0, 0]}, {-externalgenes + 200, RGBColor[0, 0, 0]}}},  
    PlotRange -> {{0, 0.4}, {135, -externalgenes + 1 - 135}},  
    DisplayFunction -> Identity],  
  g = FullGraphics[g],  
  g[[1, 2]] = g[[1, 2]] /.  
    Text[labely, {b_, c_}, {1., 0.}] ->  
    Text[labely, {b, c}, {0, 0}, {0, 1}],  
  g[[1, 2]] = g[[1, 2]] /.  
    Text[labelx, {b_, c_}, {0., -1.}] ->  
    Text[labelx, {b, c + 1600}, {0, -1}, {1, 0}],  
  g[[1, 2]] = g[[1, 2]] /.  
    Text[a_, {b_, c_}, {0., -1.}] ->  
    Text[a, {b, c + 700}, {0, 0}, {0, 1}],  
  p[[n]] = Show[g,  
    AspectRatio -> 1 / 1.2 / GoldenRatio,  
    PlotRange -> All,  
    DisplayFunction -> Identity]  
}, {n, 1, externalarrays}];
```

(\* Display Sorted External Arrays \*)

```
Show[Table[p[[a]], {a, 1, externalarrays}],  
  DisplayFunction -> $DisplayFunction];
```

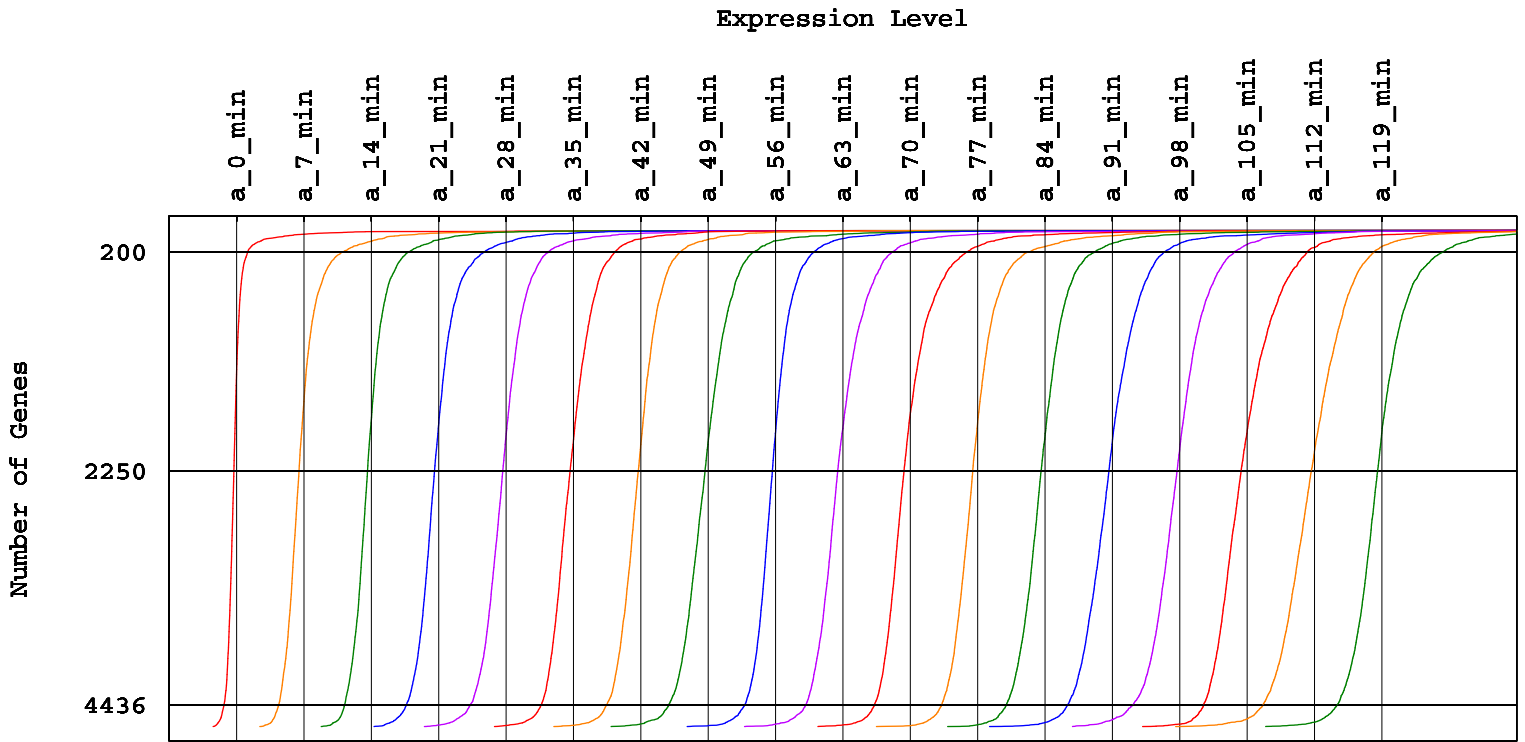

(\* Estimate Significance of Association of External Data with the Cell Cycle \*)

(\* Use Microarray Classification of Yeast Genes \*)

```
most = 200;
genenames = TakeColumns[externalgenenames, {2}];
stages = {"M/G1", "G1", "S", "S/G2", "G2/M", "None"};
numbers = Flatten[Table[{Count[Flatten[genenames], stages[[a]]], {a, 1, Dimensions[stages][[1]]}]];
genelet = Table[{a}, {a, 1, externalarrays}];
probability = Table[{0}, {a, 1, Dimensions[genelet][[1]]}];
parallelannotation = Table[{0}, {a, 1, Dimensions[genelet][[1]]}];
parallelprobability = Table[{0}, {a, 1, Dimensions[genelet][[1]]}];
antiannotation = Table[{0}, {a, 1, Dimensions[genelet][[1]]}];
antiprobability = Table[{0}, {a, 1, Dimensions[genelet][[1]]}];

Do[{
  arraylet = TakeColumns[Sort[
    AppendRows[TakeColumns[externalmatrix, genelet[[c]], genenames],
    OrderedQ[{{#2}, {#1}}] &], {2}],
  table = Table[{
    stages[[a]],
    numbers[[a]],
    Count[Flatten[TakeRows[arraylet, {1, most}]], stages[[a]]],
    {a, 1, Dimensions[stages][[1]]}],
  probability = Table[{
    Sum[N[Binomial[table[[a, 2]], b] * Binomial[externalgenes - table[[a, 2]], most - b] /
      Binomial[externalgenes, most]], {b, table[[a, 3]], most}],
    stages[[a]],
    {a, 1, Dimensions[stages][[1]]}],
  parallelannotation[[c]] = {Sort[probability, OrderedQ[{{#1}, {#2}}] &][[1, 2]]},
  parallelprobability[[c]] = {ScientificForm[Sort[probability, OrderedQ[{{#1}, {#2}}] &][[1, 1], 2]}],
  table = Table[{
    stages[[a]],
    numbers[[a]],
    Count[Flatten[TakeRows[arraylet, {externalgenes - most + 1, externalgenes}]], stages[[a]]],
    {a, 1, Dimensions[stages][[1]]}],
  probability = Table[{
    Sum[N[Binomial[table[[a, 2]], b] * Binomial[externalgenes - table[[a, 2]], most - b] /
      Binomial[externalgenes, most]], {b, table[[a, 3]], most}],
    stages[[a]],
    {a, 1, Dimensions[stages][[1]]}],
  antiannotation[[c]] = {Sort[probability, OrderedQ[{{#1}, {#2}}] &][[1, 2]]},
  antiprobability[[c]] = {ScientificForm[Sort[probability, OrderedQ[{{#1}, {#2}}] &][[1, 1], 2]}],
  {c, 1, Dimensions[genelet][[1]]}

table1 = AppendRows [
  Table[{externalarraynames[[2, a]], {a, 1, externalarrays}],
  parallelannotation,
  parallelprobability,
  antiannotation,
  antiprobability];
```

(\* Use Traditional Classification of Yeast Genes \*)

```
most = 200;
genenames = TakeColumns[externalgenenames, {3}];
stages = {"M/G1", "G1", "S", "S/G2", "G2/M", "None"};
numbers = Flatten[Table[{Count[Flatten[genenames], stages[[a]]]}, {a, 1, Dimensions[stages][[1]]}]];
genelet = Table[{a}, {a, 1, externalarrays}];
probability = Table[{0}, {a, 1, Dimensions[genelet][[1]]}];
parallelannotation = Table[{0}, {a, 1, Dimensions[genelet][[1]]}];
parallelprobability = Table[{0}, {a, 1, Dimensions[genelet][[1]]}];
antiannotation = Table[{0}, {a, 1, Dimensions[genelet][[1]]}];
antiprobability = Table[{0}, {a, 1, Dimensions[genelet][[1]]}];

Do[{
  arraylet = TakeColumns[Sort[
    AppendRows[TakeColumns[externalmatrix, genelet[[c]], genenames],
    OrderedQ[{{#2}, {#1}}] &], {2}],
  table = Table[{
    stages[[a]],
    numbers[[a]],
    Count[Flatten[TakeRows[arraylet, {1, most}]], stages[[a]]],
    {a, 1, Dimensions[stages][[1]]}],
  probability = Table[{
    Sum[N[Binomial[table[[a, 2]], b] * Binomial[externalgenes - table[[a, 2]], most - b] /
      Binomial[externalgenes, most]], {b, table[[a, 3]], most}],
    stages[[a]],
    {a, 1, Dimensions[stages][[1]]}],
  parallelannotation[[c]] = {Sort[probability, OrderedQ[{{#1}, {#2}}] &][[1, 2]]},
  parallelprobability[[c]] = {ScientificForm[Sort[probability, OrderedQ[{{#1}, {#2}}] &][[1, 1]], 2]},
  table = Table[{
    stages[[a]],
    numbers[[a]],
    Count[Flatten[TakeRows[arraylet, {externalgenes - most + 1, externalgenes}]], stages[[a]]],
    {a, 1, Dimensions[stages][[1]]}],
  probability = Table[{
    Sum[N[Binomial[table[[a, 2]], b] * Binomial[externalgenes - table[[a, 2]], most - b] /
      Binomial[externalgenes, most]], {b, table[[a, 3]], most}],
    stages[[a]],
    {a, 1, Dimensions[stages][[1]]}],
  antiannotation[[c]] = {Sort[probability, OrderedQ[{{#1}, {#2}}] &][[1, 2]]},
  antiprobability[[c]] = {ScientificForm[Sort[probability, OrderedQ[{{#1}, {#2}}] &][[1, 1]], 2]},
  {c, 1, Dimensions[genelet][[1]]}

table2 = AppendRows[
  Table[{externalarraynames[[2, a]], {a, 1, externalarrays}},
  parallelannotation,
  parallelprobability,
  antiannotation,
  antiprobability];
```

(\* Display Significance of Association of External Arrays with the Cell Cycle \*)

```
headerx = {{
  ColumnForm[{" ", " ", " "}, Left],
  ColumnForm[{" ", " ", "Classification"}, Left],
  ColumnForm[{" ", "External", "Array"}, Left],
  ColumnForm[{"Most Likely", "Parallel", "Association"}, Left],
  ColumnForm[{"P-Value of", "Parallel", "Association"}, Left],
  ColumnForm[{"Most Likely", "Antiparallel", "Association"}, Left],
  ColumnForm[{"P-Value of", "Antiparallel", "Association"}, Left]},
{" ", " ", " ", " ", " ", " ", " ", " ", " "}};
spacerx = {" ", " ", " ", " ", " "};
headery = Table[" ", {a, 1, 2*externalarrays + 1}, {b, 1, 2}];
headery[[1]] = {"(a)", "Microarray"};
headery[[externalarrays + 2]] = {"(b)", "Traditional"};
association =
  AppendColumns[headerx,
  AppendRows[headery,
  AppendColumns[table1, spacerx, table2]]];
TableForm[association, TableSpacing -> {1, 1}]
```

| Classification  | External Array | Most Likely Parallel Association | P-Value of Parallel Association | Most Likely Antiparallel Association | P-Value of Antiparallel Association |
|-----------------|----------------|----------------------------------|---------------------------------|--------------------------------------|-------------------------------------|
| (a) Microarray  | a_0_min        | G2/M                             | $3.3 \times 10^{-6}$            | G1                                   | $5. \times 10^{-27}$                |
|                 | a_7_min        | M/G1                             | $5.7 \times 10^{-4}$            | S                                    | $1.3 \times 10^{-6}$                |
|                 | a_14_min       | G1                               | $4.3 \times 10^{-26}$           | G2/M                                 | $3.3 \times 10^{-6}$                |
|                 | a_21_min       | G1                               | $4. \times 10^{-57}$            | G2/M                                 | $1.1 \times 10^{-18}$               |
|                 | a_28_min       | G1                               | $4.6 \times 10^{-19}$           | G2/M                                 | $6.2 \times 10^{-16}$               |
|                 | a_35_min       | S                                | $2.1 \times 10^{-10}$           | M/G1                                 | $2.1 \times 10^{-20}$               |
|                 | a_42_min       | S/G2                             | $1.2 \times 10^{-11}$           | M/G1                                 | $4.8 \times 10^{-25}$               |
|                 | a_49_min       | G2/M                             | $6.2 \times 10^{-16}$           | M/G1                                 | $4.8 \times 10^{-30}$               |
|                 | a_56_min       | G2/M                             | $3.1 \times 10^{-31}$           | G1                                   | $6.9 \times 10^{-51}$               |
|                 | a_63_min       | G2/M                             | $6.2 \times 10^{-16}$           | G1                                   | $6.8 \times 10^{-16}$               |
|                 | a_70_min       | M/G1                             | $1.6 \times 10^{-21}$           | S/G2                                 | $4.1 \times 10^{-9}$                |
|                 | a_77_min       | G1                               | $2.5 \times 10^{-62}$           | S/G2                                 | $1.4 \times 10^{-7}$                |
|                 | a_84_min       | G1                               | $5.8 \times 10^{-34}$           | G2/M                                 | $1.4 \times 10^{-21}$               |
|                 | a_91_min       | G1                               | $1.8 \times 10^{-8}$            | G2/M                                 | $8.5 \times 10^{-9}$                |
|                 | a_98_min       | S/G2                             | $3.3 \times 10^{-3}$            | M/G1                                 | $2. \times 10^{-3}$                 |
|                 | a_105_min      | G2/M                             | $4.8 \times 10^{-4}$            | M/G1                                 | $3.3 \times 10^{-18}$               |
|                 | a_112_min      | G2/M                             | $3.1 \times 10^{-10}$           | M/G1                                 | $3.3 \times 10^{-18}$               |
| a_119_min       | G2/M           | $3.3 \times 10^{-14}$            | G1                              | $9.7 \times 10^{-21}$                |                                     |
| (b) Traditional | a_0_min        | M/G1                             | $4.4 \times 10^{-6}$            | G1                                   | $7. \times 10^{-14}$                |
|                 | a_7_min        | M/G1                             | $1.3 \times 10^{-2}$            | S                                    | $3.4 \times 10^{-6}$                |
|                 | a_14_min       | G1                               | $4.2 \times 10^{-7}$            | S                                    | $3.4 \times 10^{-6}$                |
|                 | a_21_min       | G1                               | $7. \times 10^{-14}$            | M/G1                                 | $1.7 \times 10^{-7}$                |
|                 | a_28_min       | G1                               | $2. \times 10^{-11}$            | M/G1                                 | $4.5 \times 10^{-9}$                |
|                 | a_35_min       | S                                | $3.4 \times 10^{-6}$            | M/G1                                 | $4.4 \times 10^{-6}$                |
|                 | a_42_min       | S                                | $1. \times 10^{-2}$             | M/G1                                 | $1.1 \times 10^{-12}$               |
|                 | a_49_min       | G2/M                             | $7.6 \times 10^{-3}$            | M/G1                                 | $1.1 \times 10^{-12}$               |
|                 | a_56_min       | G2/M                             | $2.7 \times 10^{-8}$            | G1                                   | $3.5 \times 10^{-15}$               |
|                 | a_63_min       | G2/M                             | $5.8 \times 10^{-4}$            | G1                                   | $4.2 \times 10^{-8}$                |
|                 | a_70_min       | M/G1                             | $1.7 \times 10^{-7}$            | S                                    | $3.4 \times 10^{-6}$                |
|                 | a_77_min       | G1                               | $2.3 \times 10^{-22}$           | S/G2                                 | $5.5 \times 10^{-3}$                |
|                 | a_84_min       | G1                               | $1.6 \times 10^{-16}$           | G2/M                                 | $1.1 \times 10^{-6}$                |
|                 | a_91_min       | S                                | $3.4 \times 10^{-6}$            | G2/M                                 | $6.6 \times 10^{-2}$                |
|                 | a_98_min       | S                                | $3.4 \times 10^{-6}$            | M/G1                                 | $1.3 \times 10^{-2}$                |
|                 | a_105_min      | G2/M                             | $7.6 \times 10^{-3}$            | M/G1                                 | $8.8 \times 10^{-5}$                |
|                 | a_112_min      | S/G2                             | $5.5 \times 10^{-2}$            | G1                                   | $3.8 \times 10^{-6}$                |
| a_119_min       | G2/M           | $3. \times 10^{-5}$              | G1                              | $4.2 \times 10^{-8}$                 |                                     |

(\* GSVD Sort External Arrays \*)

```
genes = genes1;
genenames = TakeColumns[genenames1, 1];
arrays = arrays1;
arraynames = arraynames1;

externalgenenames = TakeColumns[externalgenenames, 1];
list = Flatten[Intersection[genenames, externalgenenames]];
{partialgenes} = Dimensions[list]

{3625}

counter = Table[{Position[genenames, list[[a]]][[1, 1]], list[[a]]}, {a, 1, partialgenes}];
counter = ReplaceAll[counter, {} -> {Null}];
counter = Sort[counter, OrderedQ[{{#1, #2}} &];
list = Flatten[TakeColumns[counter, {2}]];

counter = Table[Flatten[Position[list, genenames[[a, 1]]], {a, 1, genes}];
counter = ReplaceAll[counter, {} -> {Null}];
partialarraylets = AppendRows[counter, gsvdphases, genenames, arraylets1];
partialarraylets = Sort[partialarraylets, OrderedQ[{{#1, #2}} &];
partialphases = TakeRows[
  TakeColumns[partialarraylets, {2, 2}],
  {1, partialgenes}];
partialgenenames = TakeRows[
  TakeColumns[partialarraylets, {3, 3}],
  {1, partialgenes}];
partialarraylets = TakeRows[
  TakeColumns[partialarraylets, {4, arrays + 3}],
  {1, partialgenes}];

counter = Table[Flatten[Position[list, externalgenenames[[a, 1]]], {a, 1, externalgenes}];
counter = ReplaceAll[counter, {} -> {Null}];
partialexternalmatrix = AppendRows[counter, externalgenenames, externalmatrix];
partialexternalmatrix = Sort[partialexternalmatrix, OrderedQ[{{#1, #2}} &];
partialexternalgenenames = TakeRows[
  TakeColumns[partialexternalmatrix, {2, 2}],
  {1, partialgenes}];
partialexternalmatrix = TakeRows[
  TakeColumns[partialexternalmatrix, {3, externalarrays + 2}],
  {1, partialgenes}];
```

(\* Project Data Onto GSVD Basis and Calculate Contributions of Arraylets to External Arrays \*)

```
partialarraylets = Transpose[partialarraylets];
average = Table[1, {a, 1, partialgenes}];
average = N[average / Sqrt[Dot[average, average]]];
partialarraylets =
  partialarraylets - N[Outer[Times, Dot[partialarraylets, average], average]];
partialarraylets = Transpose[partialarraylets];

arraycontributions = Dot[PseudoInverse[partialarraylets], partialexternalmatrix];
average = Table[1, {a, 1, externalarrays}];
average = N[average / Sqrt[Dot[average, average]]];
arraycontributions =
  arraycontributions - N[Outer[Times, Dot[arraycontributions, average], average]];
```



(\* Project Arrays from 6 D Arraylets Subspace Onto 2 D Subspace \*)

```
externalcoordinates = Table[{
  (-Sqrt[3] * (arraycontributions[[3, a]] - arraycontributions[[15, a]]) +
   2 * Sqrt[3] * (arraycontributions[[4, a]] - arraycontributions[[16, a]]) +
   (3 * arraycontributions[[5, a]] + Sqrt[3] * arraycontributions[[14, a]])) / 6 /
  Sqrt[(arraycontributions[[3, a]] - arraycontributions[[15, a]])^2 / 3 +
   (arraycontributions[[4, a]] - arraycontributions[[16, a]])^2 / 3 +
   (arraycontributions[[5, a]] + arraycontributions[[14, a]] / Sqrt[3])^2 +
   Abs[(arraycontributions[[3, a]] - arraycontributions[[15, a]]) / Sqrt[3] *
    (arraycontributions[[4, a]] - arraycontributions[[16, a]]) / Sqrt[3] +
   Abs[(arraycontributions[[3, a]] - arraycontributions[[15, a]]) / Sqrt[3] *
    (arraycontributions[[5, a]] + arraycontributions[[14, a]] / Sqrt[3])] +
   Abs[(arraycontributions[[4, a]] - arraycontributions[[16, a]]) / Sqrt[3] *
    (arraycontributions[[5, a]] + arraycontributions[[14, a]] / Sqrt[3])]],
  (3 * (arraycontributions[[3, a]] - arraycontributions[[15, a]]) +
   Sqrt[3] * (3 * arraycontributions[[5, a]] + Sqrt[3] * arraycontributions[[14, a]])) / 6 /
  Sqrt[(arraycontributions[[3, a]] - arraycontributions[[15, a]])^2 / 3 +
   (arraycontributions[[4, a]] - arraycontributions[[16, a]])^2 / 3 +
   (arraycontributions[[5, a]] + arraycontributions[[14, a]] / Sqrt[3])^2 +
   Abs[(arraycontributions[[3, a]] - arraycontributions[[15, a]]) / Sqrt[3] *
    (arraycontributions[[4, a]] - arraycontributions[[16, a]]) / Sqrt[3] +
   Abs[(arraycontributions[[3, a]] - arraycontributions[[15, a]]) / Sqrt[3] *
    (arraycontributions[[5, a]] + arraycontributions[[14, a]] / Sqrt[3])] +
   Abs[(arraycontributions[[4, a]] - arraycontributions[[16, a]]) / Sqrt[3] *
    (arraycontributions[[5, a]] + arraycontributions[[14, a]] / Sqrt[3])]],
  {a, 1, externalarrays}];

gsvdarrays = externalarrays;
gsvdcoordinates = externalcoordinates;
```

(\* Classify GSVD Gene Phases into Cell Cycle Phases \*)

```
ph1 = 0;  
ph2 = -1 / 2.;  
ph3 = -1.;  
ph4 = -4 / 3.;  
ph5 = -5 / 3.;
```

```
endph5 = partialgenes;  
beginph1 = 1;  
partialphases[[endph5]] - ph1  
partialphases[[beginph1]] - ph1
```

```
{0.0000468343}
```

```
{-0.000239433}
```

```
endph1 = 856;  
beginph2 = 857;  
partialphases[[endph1]] - ph2  
partialphases[[beginph2]] - ph2
```

```
{0.00152245}
```

```
{0.999794}
```

```
endph2 = 1657;  
beginph3 = 1658;  
partialphases[[endph2]] - ph3  
partialphases[[beginph3]] - ph3
```

```
{1.0003}
```

```
{0.999906}
```

```
endph3 = 2226;  
beginph4 = 2227;  
partialphases[[endph3]] - ph4  
partialphases[[beginph4]] - ph4
```

```
{1.0009}
```

```
{0.99987}
```

```
endph4 = 3064;  
beginph5 = 3065;  
partialphases[[endph4]] - ph5  
partialphases[[beginph5]] - ph5
```

```
{2.00019}
```

```
{1.99935}
```

(\* 3625 yeast genes, 856 in M/G1, 801 in G1, 569 in S, 838 in S/G2, 561 in G2/M. \*)

```
(* Display GSVD Reconstructed Sorted External Data *)
```

```
(* GSVD Reconstruct Sorted External Data *)
```

```
subspace = Table[0, {a, 1, arrays}];  
Do[subspace[[a]] = 1, {a, 3, 5}];  
Do[subspace[[a]] = 1, {a, 14, 16}];  
matrix = Dot[partialarraylets, Dot[DiagonalMatrix[subspace], arraycontributions]];
```

```
(* Center GSVD Reconstructed Sorted External Data *)
```

```
average = Table[1, {a, 1, externalarrays}];  
average = N[average / Sqrt[Dot[average, average]]];  
matrix = matrix - N[Outer[Times, Dot[matrix, average], average]];  
matrix = Transpose[matrix];  
average = Table[1, {a, 1, partialgenes}];  
average = N[average / Sqrt[Dot[average, average]]];  
matrix = matrix - N[Outer[Times, Dot[matrix, average], average]];  
matrix = Transpose[matrix];
```

```
(* Create GSVD Reconstructed Sorted External Data 2D Red & Green Raster Display *)
```

```
contrast = 10 * 1.5;  
displaying = Table[  
  If[contrast * matrix[[i, j]] > 0,  
    If[contrast * matrix[[i, j]] < 1, {contrast * matrix[[i, j]], 0}, {1, 0}],  
    If[contrast * matrix[[i, j]] > -1, {0, -contrast * matrix[[i, j]]}, {0, 1}]],  
  {i, 1, partialgenes}, {j, 1, externalarrays}];  
framex = Table[{a - 0.5, externalarraynames[[2, a]]}, {a, 1, externalarrays}];  
framey = {  
  {partialgenes - endph1 / 2, "M/G1"},  
  {partialgenes - (endph1 + endph2) / 2, "G1"},  
  {partialgenes - (endph2 + endph3) / 2, "S"},  
  {partialgenes - (endph3 + endph4) / 2, "S/G2"},  
  {(partialgenes - endph4) / 2, "G2/M"}}];  
gridy = {  
  {partialgenes - endph1 + 0.5, {RGBColor[0, 0, 0]}},  
  {partialgenes - endph2 + 0.5, {RGBColor[0, 0, 0]}},  
  {partialgenes - endph3 + 0.5, {RGBColor[0, 0, 0]}},  
  {partialgenes - endph4 + 0.5, {RGBColor[0, 0, 0]}}];  
labelx = "(c) Arrays";  
labely = ColumnForm[{" ", "Genes", " ", " ", " ", " ", " ", " ", " "}, Center];  
g = Show[  
  Graphics[  
    RasterArray[  
      Table[  
        RGBColor[displaying[[i, j, 1]], displaying[[i, j, 2]], 0],  
        {i, partialgenes, 1, -1}, {j, 1, externalarrays}]]],  
  AspectRatio -> 1,  
  Frame -> True,  
  FrameTicks -> {None, framey, framex, None},  
  FrameLabel -> {None, labely, labelx, None},  
  GridLines -> {None, gridy},  
  DisplayFunction -> Identity];
```

```

g = FullGraphics[g];
g[[1, 2]] = g[[1, 2]] /.
  Text[labely, {b_, c_}, {1., 0.}] →
  Text[labely, {b, c}, {0, 0}, {0, 1}];
g[[1, 2]] = g[[1, 2]] /.
  Text[a_, {b_, c_}, {1., 0.}] →
  Text[a, {b - 1.5, c}, {0, 0}, {0, 1}];
g[[1, 2]] = g[[1, 2]] /.
  Text[labelx, {b_, c_}, {0., -1.}] →
  Text[labelx, {b, c + 1400}, {0, -1}, {1, 0}];
g[[1, 2]] = g[[1, 2]] /.
  Text[a_, {b_, c_}, {0., -1.}] →
  Text[a, {b, c + 700}, {0, 0}, {0, 1}];
g3 = Show[g,
  AspectRatio -> GoldenRatio * 1.2,
  PlotRange -> All,
  DisplayFunction -> Identity];

(* Create GSVD Reconstructed Sorted External Data Graph Display *)

matrix = Transpose[matrix];
matrixplot = Table[0, {a, 1, externalarrays}];
Do[
  matrixplot[[a]] = Chop[TrigFit[matrix[[a]], 1, {x, partialgenes - 1}], 0.01],
  {a, 1, externalarrays}]
table = Table[
  {externalarraynames[[2, a]], matrixplot[[a]]}, {a, 1, externalarrays}];
TableForm[table]

a_0_min      0.137614 Cos[ $\frac{\pi x}{1812}$ ] - 0.0435982 Sin[ $\frac{\pi x}{1812}$ ]
a_7_min      0.159545 Cos[ $\frac{\pi x}{1812}$ ] + 0.0346513 Sin[ $\frac{\pi x}{1812}$ ]
a_14_min     0.0676952 Sin[ $\frac{\pi x}{1812}$ ]
a_21_min     -0.090067 Cos[ $\frac{\pi x}{1812}$ ] + 0.0749473 Sin[ $\frac{\pi x}{1812}$ ]
a_28_min     -0.0980538 Cos[ $\frac{\pi x}{1812}$ ]
a_35_min     -0.079547 Cos[ $\frac{\pi x}{1812}$ ] - 0.0742371 Sin[ $\frac{\pi x}{1812}$ ]
a_42_min     -0.122127 Sin[ $\frac{\pi x}{1812}$ ]
a_49_min     0.0247122 Cos[ $\frac{\pi x}{1812}$ ] - 0.0901914 Sin[ $\frac{\pi x}{1812}$ ]
a_56_min     0.0517049 Cos[ $\frac{\pi x}{1812}$ ] - 0.031871 Sin[ $\frac{\pi x}{1812}$ ]
a_63_min     0.0872474 Cos[ $\frac{\pi x}{1812}$ ] + 0.0312449 Sin[ $\frac{\pi x}{1812}$ ]
a_70_min     0.0814359 Sin[ $\frac{\pi x}{1812}$ ]
a_77_min     -0.0305353 Cos[ $\frac{\pi x}{1812}$ ] + 0.122854 Sin[ $\frac{\pi x}{1812}$ ]
a_84_min     -0.023398 Cos[ $\frac{\pi x}{1812}$ ] + 0.0164896 Sin[ $\frac{\pi x}{1812}$ ]
a_91_min     -0.105753 Cos[ $\frac{\pi x}{1812}$ ] + 0.050148 Sin[ $\frac{\pi x}{1812}$ ]
a_98_min     -0.0485223 Cos[ $\frac{\pi x}{1812}$ ]
a_105_min    0.0124528 Sin[ $\frac{\pi x}{1812}$ ]
a_112_min    -0.0423649 Cos[ $\frac{\pi x}{1812}$ ] - 0.118191 Sin[ $\frac{\pi x}{1812}$ ]
a_119_min    0.0551446 Cos[ $\frac{\pi x}{1812}$ ]

p = Table[0, {a, 1, externalarrays}];
color = {
  RGBColor[0.75, 0, 1],
  RGBColor[1, 0, 0],
  RGBColor[1, 0.5, 0],
  RGBColor[0, 0.5, 0],
  RGBColor[0, 0, 1]};
labelx = "(d) Expression Level";
framex = Table[{0.5 * a, externalarraynames[[2, a]]},
  {a, 1, externalarrays}];

```

```

Do[{
  graph = ParametricPlot[{matrixplot[[n]] + 0.5 * n, -x},
    {x, 0, partialgenes - 1},
    PlotStyle -> {RGBColor[0, 0, 0]},
    DisplayFunction -> Identity],
  coordinates = Table[
    If[matrix[[n, a]] + 0.5 * n < 0, 0,
      If[matrix[[n, a]] + 0.5 * n > 9.5, 9.5,
        matrix[[n, a]] + 0.5 * n]],
    {a, 1, partialgenes}],
  coordinates = Table[{coordinates[[a]], -a + 1}, {a, 1, partialgenes}],
  line = Line[coordinates],
  g = Show[{
    Graphics[{color[[Mod[n, 5] + 1]], line}],
    graph},
  Frame -> True,
  FrameLabel -> {None, None, labelx, None},
  FrameTicks -> {None, None, framex, None},
  GridLines -> {{{0.5 * n, RGBColor[0, 0, 0]}}, None},
  PlotRange -> {{0, 9.5}, {95, -partialgenes + 1 - 95}},
  DisplayFunction -> Identity],
  g = FullGraphics[g],
  g[[1, 2]] = g[[1, 2]] /.
  Text[labely, {b_, c_}, {1., 0.}] ->
  Text[labely, {b, c}, {0, 0}, {0, 1}],
  g[[1, 2]] = g[[1, 2]] /.
  Text[labelx, {b_, c_}, {0., -1.}] ->
  Text[labelx, {b, c + 1350}, {0, -1}, {1, 0}],
  g[[1, 2]] = g[[1, 2]] /.
  Text[a_, {b_, c_}, {0., -1.}] ->
  Text[a, {b, c + 675}, {0, 0}, {0, 1}],
  p[[n]] = Show[g,
    AspectRatio -> GoldenRatio * 1.2 / 2.5,
    PlotRange -> All,
    DisplayFunction -> Identity]
}, {n, 1, externalarrays}];

g4 = Show[Table[p[[a]], {a, 1, externalarrays}],
  DisplayFunction -> Identity];

```

(\* Create GSVD Basis External Array Correlations Bar Chart Display \*)

```

partialarraylets = Transpose[partialarraylets];
partialarraylets = Drop[partialarraylets, {17, 18}];
partialarraylets = Drop[partialarraylets, {6, 13}];
partialarraylets = Drop[partialarraylets, {1, 2}];
partialarraylets = Transpose[partialarraylets];

average = Table[1, {a, 1, externalarrays}];
average = N[average / Sqrt[Dot[average, average]]];
partialexternalmatrix =
  partialexternalmatrix - N[Outer[Times, Dot[partialexternalmatrix, average], average]];
partialexternalmatrix = Transpose[partialexternalmatrix];
average = Table[1, {a, 1, partialgenes}];
average = N[average / Sqrt[Dot[average, average]]];
partialexternalmatrix =
  partialexternalmatrix - N[Outer[Times, Dot[partialexternalmatrix, average], average]];
partialexternalmatrix = Transpose[partialexternalmatrix];

```

```

u = Transpose[SingularValues[partialarraylets][[1]]];
gsvdcorrelation =
  Table[
    Sqrt[
      Sum[(Dot[Transpose[partialexternalmatrix][[a]], u]^2)[[b]], {b, 1, 6}] /
      Dot[Transpose[partialexternalmatrix][[a]], Transpose[partialexternalmatrix][[a]]],
      {a, 1, externalarrays}];
Sort[gsvdcorrelation, OrderedQ[{{#2}, {#1}}] &][[1]]

0.843396

limit = 1;

gridx = Table[a, {a, 0, limit, limit/5.}];
framex = gridx;
sizes = Flatten[
  Table[
    Dimensions[
      Characters[
        ToString[framex[[a]]
      ]], {a, 1, 6}]];
Do[
  Do[framex[[a]] = StringJoin[ToString[framex[[a]]], " "],
  {b, 1, size - sizes[[a]]},
  {a, 1, 6}];
framex = Table[{gridx[[a]], framex[[a]]}, {a, 1, 6}];
gridx = Table[{gridx[[a]], RGBColor[0, 0, 0]}, {a, 1, 6}];
framey = Table[{a + 1, externalarrays - a}, {a, 0, externalarrays - 1}];
labelx = "(b) GSVD Basis Correlation";
labely = " ";
g = BarChart[
  Table[gsvdcorrelation[[externalarrays - a]], {a, 0, externalarrays - 1}],
  BarOrientation -> Horizontal,
  PlotRange -> {{0, limit + 0.001}, {0.5, externalarrays + 0.5}},
  AspectRatio -> 1,
  Axes -> False,
  Frame -> True,
  FrameTicks -> {None, framey, framex, None},
  FrameLabel -> {None, labely, labelx, None},
  GridLines -> {gridx, None},
  DisplayFunction -> Identity];
g = FullGraphics[g];
g[[1, 2]] = g[[1, 2]] /.
  Text[labely, {b_, c_}, {1., 0.}] ->
  Text[labely, {b - limit/5., c}, {0, 0}, {0, 1}];
g[[1, 2]] = g[[1, 2]] /.
  Text[labelx, {b_, c_}, {0., -1.}] ->
  Text[labelx, {b, c + 4}, {0, -1}, {1, 0}];
g[[1, 2]] = g[[1, 2]] /.
  Text[a_, {b_, c_}, {0., -1.}] ->
  Text[a, {b, c + 3}, {0, 0}, {0, 1}];
q4 = Show[g,
  AspectRatio -> 1.05,
  PlotRange -> All,
  DisplayFunction -> Identity];

```

```
(* SVD Sort External Arrays *)
```

```
genes = genes2;
genenames = TakeColumns[genenames2, 1];
arrays = arrays2;
arraynames = arraynames2;

externalgenenames = TakeColumns[externalgenenames, 1];
list = Flatten[Intersection[genenames, externalgenenames]];
{partialgenes} = Dimensions[list]

{3954}

counter = Table[{Position[genenames, list[[a]]][[1, 1]], list[[a]]}, {a, 1, partialgenes}];
counter = ReplaceAll[counter, {} -> {Null}];
counter = Sort[counter, OrderedQ[{{#1, #2}} &];
list = Flatten[TakeColumns[counter, {2}]];

counter = Table[Flatten[Position[list, genenames[[a, 1]]], {a, 1, genes}];
counter = ReplaceAll[counter, {} -> {Null}];
partialeigenarrays = AppendRows[counter, svdphases, genenames, eigenarrays];
partialeigenarrays = Sort[partialeigenarrays, OrderedQ[{{#1, #2}} &];
partialphases = TakeRows[
  TakeColumns[partialeigenarrays, {2, 2}],
  {1, partialgenes}];
partialgenenames = TakeRows[
  TakeColumns[partialeigenarrays, {3, 3}],
  {1, partialgenes}];
partialeigenarrays = TakeRows[
  TakeColumns[partialeigenarrays, {4, arrays + 3}],
  {1, partialgenes}];
partialeigenarrays = TakeColumns[partialeigenarrays, {1, 6}];

counter = Table[Flatten[Position[list, externalgenenames[[a, 1]]], {a, 1, externalgenes}];
counter = ReplaceAll[counter, {} -> {Null}];
partialexternalmatrix = AppendRows[counter, externalgenenames, externalmatrix];
partialexternalmatrix = Sort[partialexternalmatrix, OrderedQ[{{#1, #2}} &];
partialexternalgenenames = TakeRows[
  TakeColumns[partialexternalmatrix, {2, 2}],
  {1, partialgenes}];
partialexternalmatrix = TakeRows[
  TakeColumns[partialexternalmatrix, {3, externalarrays + 2}],
  {1, partialgenes}];
```

```
(* Center Gene Data *)
```

```
average = Table[1, {a, 1, externalarrays}];
average = N[average / Sqrt[Dot[average, average]]];
partialexternalmatrix =
  partialexternalmatrix - N[Outer[Times, Dot[partialexternalmatrix, average], average]];
```

```
(* Center Array Data *)
```

```
partialexternalmatrix = Transpose[partialexternalmatrix];
average = Table[1, {a, 1, partialgenes}];
average = N[average / Sqrt[Dot[average, average]]];
partialexternalmatrix =
  partialexternalmatrix - N[Outer[Times, Dot[partialexternalmatrix, average], average]];
partialexternalmatrix = Transpose[partialexternalmatrix];
```

(\* Create SVD Basis External Array Correlations Bar Chart Display \*)

```
u = Transpose[SingularValues[partialeigenarrays][[1]]];
svdcorrelation =
  Table[
    Sqrt[
      Sum[(Dot[Transpose[partialexternalmatrix][[a]], u]^2)[[b]], {b, 1, 6}] /
      Dot[Transpose[partialexternalmatrix][[a]], Transpose[partialexternalmatrix][[a]]],
      {a, 1, externalarrays}];
Sort[svdcorrelation, OrderedQ[{{#2}, {#1}}] &][[1]]

0.588331

limit = 0.6;

gridx = Table[a, {a, 0, limit, limit/5.}];
framex = gridx;
sizes = Flatten[
  Table[
    Dimensions[
      Characters[
        ToString[framex[[a]]
      ]], {a, 1, 6}]];
Do[
  Do[framex[[a]] = StringJoin[ToString[framex[[a]]], " "],
  {b, 1, size - sizes[[a]]},
  {a, 1, 6}];
framex = Table[{gridx[[a]], framex[[a]]}, {a, 1, 6}];
gridx = Table[{gridx[[a]], RGBColor[0, 0, 0]}, {a, 1, 6}];
framey = Table[{a + 1, externalarrays - a}, {a, 0, externalarrays - 1}];
labelx = "(a) SVD Basis Correlation";
labeledy = "Arrays";
g = BarChart[
  Table[svdcorrelation[[externalarrays - a]], {a, 0, externalarrays - 1}],
  BarOrientation -> Horizontal,
  PlotRange -> {{0, limit + 0.001}, {0.5, externalarrays + 0.5}},
  AspectRatio -> 1,
  Axes -> False,
  Frame -> True,
  FrameTicks -> {None, framey, framex, None},
  FrameLabel -> {None, labeledy, labelx, None},
  GridLines -> {gridx, None},
  DisplayFunction -> Identity];
g = FullGraphics[g];
g[[1, 2]] = g[[1, 2]] /.
  Text[labeledy, {b_, c_}, {1., 0.}] ->
  Text[labeledy, {b - limit/5., c}, {0, 0}, {0, 1}];
g[[1, 2]] = g[[1, 2]] /.
  Text[labelx, {b_, c_}, {0., -1.}] ->
  Text[labelx, {b, c + 4}, {0, -1}, {1, 0}];
g[[1, 2]] = g[[1, 2]] /.
  Text[a_, {b_, c_}, {0., -1.}] ->
  Text[a, {b, c + 3}, {0, 0}, {0, 1}];
q3 = Show[g,
  AspectRatio -> 1.05,
  PlotRange -> All,
  DisplayFunction -> Identity];
```



```
(* Project Data Onto SVD Basis *)
```

```
externalarraycorrelations = Dot[PseudoInverse[partialeigenarrays], partialexternalmatrix];  
partialexternalmatrix = Dot[partialeigenarrays, externalarraycorrelations];
```

```
(* Calculate Contributions of Eigenarrays to External Arrays *)
```

```
partialexternalmatrix = Transpose[partialexternalmatrix];  
externalcoordinates = Table[  
  {externalarraycorrelations[[1, a]] /  
    Sqrt[Dot[partialexternalmatrix[[a]], partialexternalmatrix[[a]]]},  
    externalarraycorrelations[[2, a]] /  
    Sqrt[Dot[partialexternalmatrix[[a]], partialexternalmatrix[[a]]]}},  
  {a, 1, externalarrays}];  
partialexternalmatrix = Transpose[partialexternalmatrix];  
  
svdarrays = externalarrays;  
svdcoordinates = externalcoordinates;
```

(\* Classify SVD Gene Phases into Cell Cycle Phases \*)

```
ph1 = 0;  
ph2 = -1 / 2.;  
ph3 = -1.;  
ph4 = -4 / 3.;  
ph5 = -5 / 3.;
```

```
endph5 = partialgenes;  
beginph1 = 1;  
partialphases[[endph5]] - ph1  
partialphases[[beginph1]] - ph1
```

{0.000221307}

{-0.000315169}

```
endph1 = 867;  
beginph2 = 868;  
partialphases[[endph1]] - ph2  
partialphases[[beginph2]] - ph2
```

{0.00276875}

{0.999788}

```
endph2 = 1649;  
beginph3 = 1650;  
partialphases[[endph2]] - ph3  
partialphases[[beginph3]] - ph3
```

{1.00101}

{0.999626}

```
endph3 = 2245;  
beginph4 = 2246;  
partialphases[[endph3]] - ph4  
partialphases[[beginph4]] - ph4
```

{1.00001}

{0.999872}

```
endph4 = 3225;  
beginph5 = 3226;  
partialphases[[endph4]] - ph5  
partialphases[[beginph5]] - ph5
```

{2.00032}

{1.99995}

(\* 3954 yeast genes, 867 in M/G1, 782 in G1, 596 in S, 980 in S/G2, 729 in G2/M. \*)

```

(* Display SVD Reconstructed and Sorted External Data *)

(* SVD Reconstruct Sorted External Data *)

matrix = partialexternalmatrix;

(* Create SVD Reconstructed Sorted External Data 2 D Red & Green Raster Display *)

contrast = 10 * 1.5;
displaying = Table[
  If[contrast * matrix[[i, j]] > 0,
    If[contrast * matrix[[i, j]] < 1, {contrast * matrix[[i, j]], 0}, {1, 0}],
    If[contrast * matrix[[i, j]] > -1, {0, -contrast * matrix[[i, j]]}, {0, 1}]],
  {i, 1, partialgenes}, {j, 1, externalarrays}];
framex = Table[{a - 0.5, externalarraynames[[2, a]]}, {a, 1, externalarrays}];
framey = {
  {partialgenes - endph1 / 2, "M/G1"},
  {partialgenes - (endph1 + endph2) / 2, "G1"},
  {partialgenes - (endph2 + endph3) / 2, "S"},
  {partialgenes - (endph3 + endph4) / 2, "S/G2"},
  {(partialgenes - endph4) / 2, "G2/M"}];
gridy = {
  {partialgenes - endph1 + 0.5, {RGBColor[0, 0, 0]}},
  {partialgenes - endph2 + 0.5, {RGBColor[0, 0, 0]}},
  {partialgenes - endph3 + 0.5, {RGBColor[0, 0, 0]}},
  {partialgenes - endph4 + 0.5, {RGBColor[0, 0, 0]}}];
labelx = "(a) Arrays";
labely = ColumnForm[{" ", "Genes", " ", " ", " ", " ", " ", " ", " ", " "}, Center];
g = Show[
  Graphics[
    RasterArray[
      Table[
        RGBColor[displaying[[i, j, 1]], displaying[[i, j, 2]], 0],
        {i, partialgenes, 1, -1}, {j, 1, externalarrays}]]],
  AspectRatio -> 1,
  Frame -> True,
  FrameTicks -> {None, framey, framex, None},
  FrameLabel -> {None, labely, labelx, None},
  GridLines -> {None, gridy},
  DisplayFunction -> Identity];

```

```

g = FullGraphics[g];
g[[1, 2]] = g[[1, 2]] /.
  Text[labely, {b_, c_}, {1., 0.}] →
  Text[labely, {b, c}, {0, 0}, {0, 1}];
g[[1, 2]] = g[[1, 2]] /.
  Text[a_, {b_, c_}, {1., 0.}] →
  Text[a, {b - 1.5, c}, {0, 0}, {0, 1}];
g[[1, 2]] = g[[1, 2]] /.
  Text[labelx, {b_, c_}, {0., -1.}] →
  Text[labelx, {b, c + 1400}, {0, -1}, {1, 0}];
g[[1, 2]] = g[[1, 2]] /.
  Text[a_, {b_, c_}, {0., -1.}] →
  Text[a, {b, c + 700}, {0, 0}, {0, 1}];
g1 = Show[g,
  AspectRatio -> GoldenRatio * 1.2,
  PlotRange -> All,
  DisplayFunction -> Identity];

```

(\* Create Reconstructed Sorted External Data Graph Display \*)

```

matrix = Transpose[matrix];
matrixplot = Table[0, {a, 1, externalarrays}];
Do[
  matrixplot[[a]] = Chop[TrigFit[matrix[[a]], 1, {x, partialgenes - 1}], 0.02],
  {a, 1, externalarrays}]
table = Table[
  {externalarraynames[[2, a]], matrixplot[[a]]}, {a, 1, externalarrays}];
TableForm[table]

```

```

a_0_min      -0.0298304 Cos[  $\frac{2 \pi x}{3953}$  ] - 0.0555269 Sin[  $\frac{2 \pi x}{3953}$  ]
a_7_min      0.0852254 Cos[  $\frac{2 \pi x}{3953}$  ] + 0.0987516 Sin[  $\frac{2 \pi x}{3953}$  ]
a_14_min     -0.0347534 - 0.0324876 Cos[  $\frac{2 \pi x}{3953}$  ] + 0.113899 Sin[  $\frac{2 \pi x}{3953}$  ]
a_21_min     -0.0332091 - 0.0670885 Cos[  $\frac{2 \pi x}{3953}$  ] + 0.130139 Sin[  $\frac{2 \pi x}{3953}$  ]
a_28_min     -0.0958274 Cos[  $\frac{2 \pi x}{3953}$  ]
a_35_min     -0.0208353 Sin[  $\frac{2 \pi x}{3953}$  ]
a_42_min     -0.0403921 Cos[  $\frac{2 \pi x}{3953}$  ] - 0.104686 Sin[  $\frac{2 \pi x}{3953}$  ]
a_49_min     0.043178 Cos[  $\frac{2 \pi x}{3953}$  ] - 0.0755126 Sin[  $\frac{2 \pi x}{3953}$  ]
a_56_min     0.0628262 Cos[  $\frac{2 \pi x}{3953}$  ] - 0.0545885 Sin[  $\frac{2 \pi x}{3953}$  ]
a_63_min     0.124974 Cos[  $\frac{2 \pi x}{3953}$  ]
a_70_min     0.056966 Cos[  $\frac{2 \pi x}{3953}$  ] + 0.0545245 Sin[  $\frac{2 \pi x}{3953}$  ]
a_77_min     -0.0206309 Cos[  $\frac{2 \pi x}{3953}$  ] + 0.0959781 Sin[  $\frac{2 \pi x}{3953}$  ]
a_84_min     -0.0429149 Cos[  $\frac{2 \pi x}{3953}$  ]
a_91_min     -0.0507345 Cos[  $\frac{2 \pi x}{3953}$  ] + 0.0223237 Sin[  $\frac{2 \pi x}{3953}$  ]
a_98_min     -0.0647489 Cos[  $\frac{2 \pi x}{3953}$  ] - 0.0463648 Sin[  $\frac{2 \pi x}{3953}$  ]
a_105_min    0.0301683 Cos[  $\frac{2 \pi x}{3953}$  ]
a_112_min    0.0256747 - 0.115957 Sin[  $\frac{2 \pi x}{3953}$  ]
a_119_min    0.0217212 + 0.0668363 Cos[  $\frac{2 \pi x}{3953}$  ] - 0.05363 Sin[  $\frac{2 \pi x}{3953}$  ]

```

```

p = Table[0, {a, 1, externalarrays}];
color = {
  RGBColor[0.75, 0, 1],
  RGBColor[1, 0, 0],
  RGBColor[1, 0.5, 0],
  RGBColor[0, 0.5, 0],
  RGBColor[0, 0, 1]};
labelx = "(b) Expression Level";
framex = Table[{0.3 * a, externalarraynames[[2, a]]},
  {a, 1, externalarrays}];

```

```

Do[{
  graph = ParametricPlot[{matrixplot[[n]] + 0.3 * n, -x},
    {x, 0, partialgenes - 1},
    PlotStyle -> {RGBColor[0, 0, 0]},
    DisplayFunction -> Identity],
  coordinates = Table[
    If[matrix[[n, a]] + 0.3 * n < 0, 0,
      If[matrix[[n, a]] + 0.3 * n > 5.7, 5.7,
        matrix[[n, a]] + 0.3 * n]],
    {a, 1, partialgenes}],
  coordinates = Table[{coordinates[[a]], -a + 1}, {a, 1, partialgenes}],
  line = Line[coordinates],
  g = Show[{
    Graphics[{color[[Mod[n, 5] + 1]], line}],
    graph},
  Frame -> True,
  FrameLabel -> {None, None, labelx, None},
  FrameTicks -> {None, None, framex, None},
  GridLines -> {{{0.3 * n, RGBColor[0, 0, 0]}}, None},
  PlotRange -> {{0, 5.7}, {95, -partialgenes + 1 - 95}},
  DisplayFunction -> Identity],
  g = FullGraphics[g],
  g[[1, 2]] = g[[1, 2]] /.
    Text[labely, {b_, c_}, {1., 0.}] ->
    Text[labely, {b, c}, {0, 0}, {0, 1}],
  g[[1, 2]] = g[[1, 2]] /.
    Text[labelx, {b_, c_}, {0., -1.}] ->
    Text[labelx, {b, c + 1350}, {0, -1}, {1, 0}],
  g[[1, 2]] = g[[1, 2]] /.
    Text[a_, {b_, c_}, {0., -1.}] ->
    Text[a, {b, c + 675}, {0, 0}, {0, 1}],
  p[[n]] = Show[g,
    AspectRatio -> GoldenRatio * 1.2 / 2.5,
    PlotRange -> All,
    DisplayFunction -> Identity]
}, {n, 1, externalarrays}];

g2 = Show[Table[p[[a]], {a, 1, externalarrays}],
  DisplayFunction -> Identity];

```

(\* Display Correlations of External Arrays with SVD and GSVD Bases \*)

```
Show[GraphicsArray[{q3, q4}],
GraphicsSpacing -> -0.125];
```

(a) SVD Basis Correlation

(b) GSVD Basis Correlation

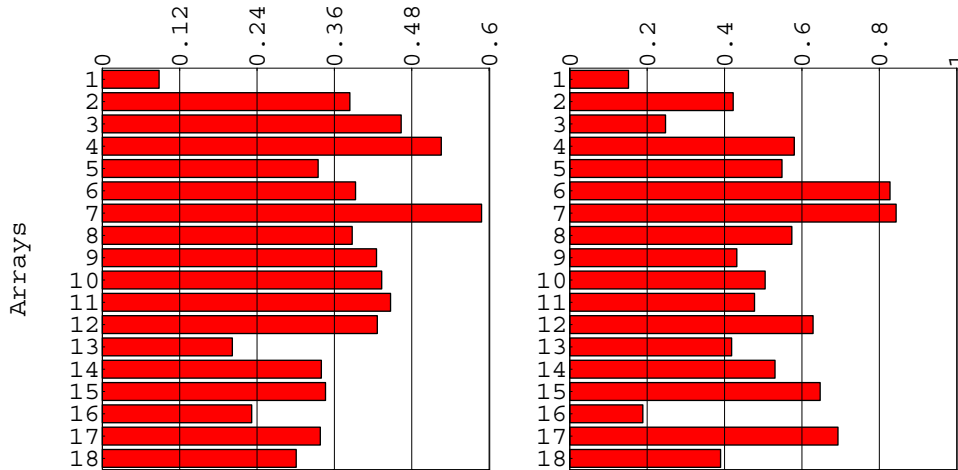

(\* Display SVD and GSVD Reconstructed and Sorted External Data \*)

```
q1 = Show[{
Graphics[{Rectangle[{0, 0}, {58, 75}, g1]}],
Graphics[{Rectangle[{56, 0}, {169, 75}, g2}]}],
PlotRange -> All,
DisplayFunction -> Identity];
q2 = Show[{
Graphics[{Rectangle[{0, 0}, {58, 75}, g3]}],
Graphics[{Rectangle[{56, 0}, {169, 75}, g4}]}],
PlotRange -> All,
DisplayFunction -> Identity];
Show[GraphicsArray[{{q1}, {q2}}],
GraphicsSpacing -> -0.11];
```

(a) Arrays

a\_0\_min  
a\_7\_min  
a\_14\_min  
a\_21\_min  
a\_28\_min  
a\_35\_min  
a\_42\_min  
a\_49\_min  
a\_56\_min  
a\_63\_min  
a\_70\_min  
a\_77\_min  
a\_84\_min  
a\_91\_min  
a\_98\_min  
a\_105\_min  
a\_112\_min  
a\_119\_min

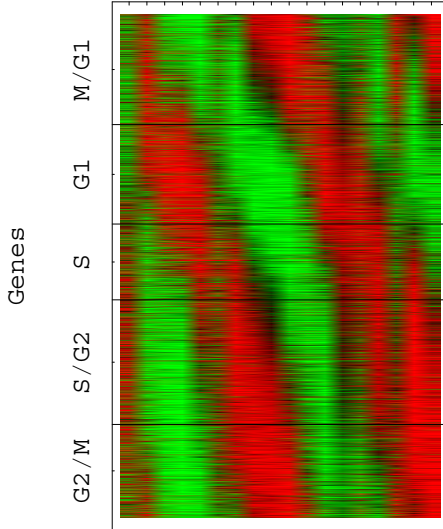

(b) Expression Level

a\_0\_min  
a\_7\_min  
a\_14\_min  
a\_21\_min  
a\_28\_min  
a\_35\_min  
a\_42\_min  
a\_49\_min  
a\_56\_min  
a\_63\_min  
a\_70\_min  
a\_77\_min  
a\_84\_min  
a\_91\_min  
a\_98\_min  
a\_105\_min  
a\_112\_min  
a\_119\_min

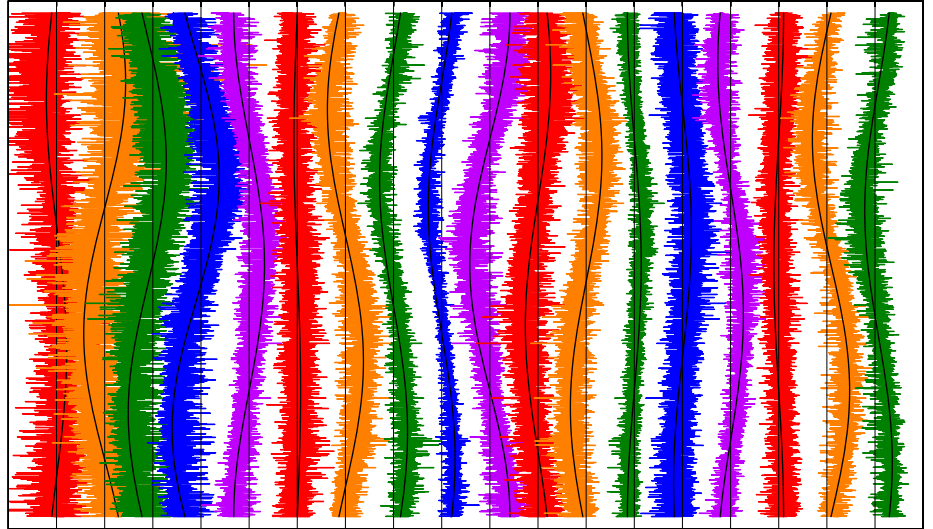

(c) Arrays

a\_0\_min  
a\_7\_min  
a\_14\_min  
a\_21\_min  
a\_28\_min  
a\_35\_min  
a\_42\_min  
a\_49\_min  
a\_56\_min  
a\_63\_min  
a\_70\_min  
a\_77\_min  
a\_84\_min  
a\_91\_min  
a\_98\_min  
a\_105\_min  
a\_112\_min  
a\_119\_min

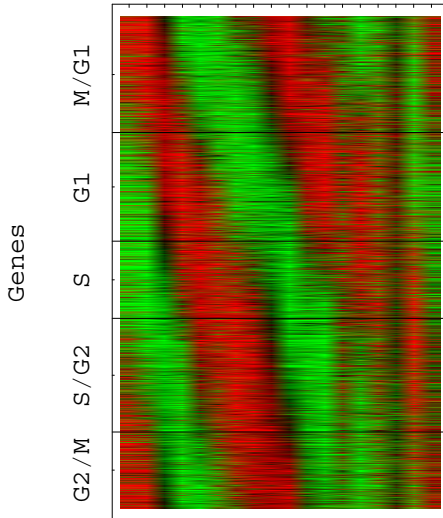

(d) Expression Level

a\_0\_min  
a\_7\_min  
a\_14\_min  
a\_21\_min  
a\_28\_min  
a\_35\_min  
a\_42\_min  
a\_49\_min  
a\_56\_min  
a\_63\_min  
a\_70\_min  
a\_77\_min  
a\_84\_min  
a\_91\_min  
a\_98\_min  
a\_105\_min  
a\_112\_min  
a\_119\_min

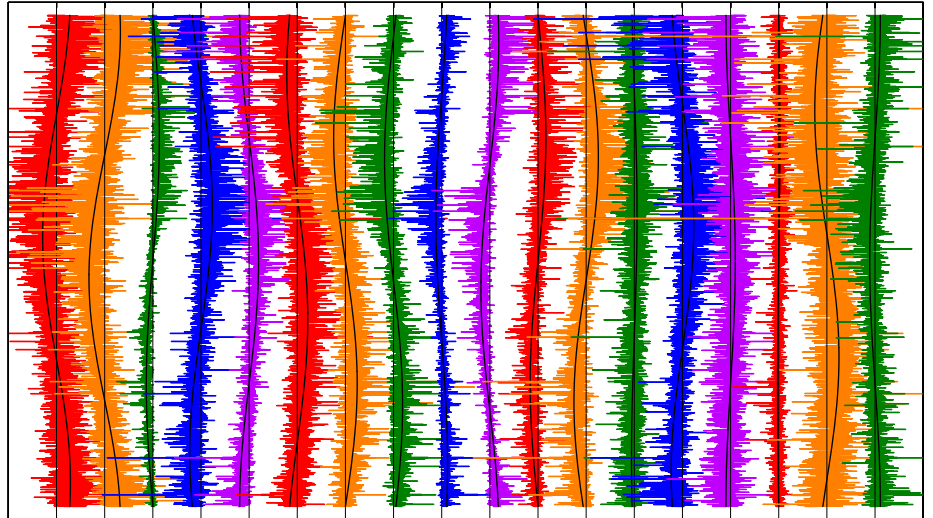

(\* Map Yeast Cell Cycle Regulators Overexpression Data \*)

(\* Read Data \*)

```
stream = "Desktop/Networks/Data/Regulator_Overexpress.txt.nb";
externalmatrix = ReadList[stream, Word, RecordLists -> True, NullWords -> True];
{externalgenes, externalarrays} = Dimensions[externalmatrix] - {2, 3}
Clear[stream];

{5840, 4}

externalgenenames = TakeRows[
  TakeColumns[externalmatrix, {1, 3}],
  {3, externalgenes + 2}];
externalarraynames = TakeColumns[
  TakeRows[externalmatrix, {1, 2}],
  {4, externalarrays + 3}];
externalmatrix = TakeColumns[
  TakeRows[externalmatrix, {3, externalgenes + 2}],
  {4, externalarrays + 3}];
externalmatrix = ToExpression[externalmatrix];

sizes = Flatten[
  Table[
    Dimensions[
      Characters[
        ToString[externalarraynames[[2, a]]
        ]]],
    {a, 1, externalarrays}]];
size = Sort[sizes, OrderedQ[{{#2, #1}} &][[1]]];
Do[
  Do[externalarraynames[[2, a]] = StringJoin[ToString[externalarraynames[[2, a]]], " "],
  {b, 1, size - sizes[[a]]}],
  {a, 1, externalarrays}];
```

(\* Display Sorted External Arrays \*)

```
arraypatterns = Transpose[externalmatrix];
```

(\* Center External Arrays \*)

```
average = Table[1, {a, 1, externalgenes}];
average = N[average / Sqrt[Dot[average, average]]];
arraypatterns = arraypatterns - N[Outer[Times, Dot[arraypatterns, average], average]];
```

(\* Normalize External Arrays \*)

```
Do[
  arraypatterns[[a]] =
  arraypatterns[[a]] / Sqrt[Dot[arraypatterns[[a]], arraypatterns[[a]]],
  {a, 1, externalarrays}]
```

(\* Sort External Arrays \*)

```
Do[
  arraypatterns[[a]] = Sort[arraypatterns[[a]], OrderedQ[{{#2}, {#1}}] &],
  {a, 1, externalarrays}]
```



(\* Create Sorted External Arrays Graph Display \*)

```
p = Table[0, {a, 1, externalarrays}];
color = {
  RGBColor[0.75, 0, 1],
  RGBColor[1, 0, 0],
  RGBColor[1, 0.5, 0],
  RGBColor[0, 0.5, 0],
  RGBColor[0, 0, 1]};
labelx = "Expression Level";
labely = ColumnForm[
  {" ", "Number of Genes", " ", " ", " ", " ", " ", " ", " ", " ", " ", " "},
  Center];
framex = Table[{0.02 * a, externalarraynames[[2, a]]},
  {a, 1, externalarrays}];
framey = {{-200, "200"}, {-3000, "3000"}, {-externalgenes + 200, "5640"}};

Do[{
  coordinates = Table[
    If[arraypatterns[[n, a]] + 0.02 * n < -0.02, -0.02,
      If[arraypatterns[[n, a]] + 0.02 * n > 0.1, 0.1,
        arraypatterns[[n, a]] + 0.02 * n],
    {a, 1, externalgenes}],
  coordinates = Table[{coordinates[[a]], -a + 1}, {a, 1, externalgenes}],
  line = Line[coordinates],
  g = Show[
    Graphics[{color[[Mod[n, 5] + 1]], line}],
    Frame -> True,
    FrameLabel -> {None, labely, labelx, None},
    FrameTicks -> {None, framey, framex, None},
    GridLines -> {{{{0.02 * n, RGBColor[0, 0, 0]}}, {{-200, RGBColor[0, 0, 0]},
      {-3000, RGBColor[0, 0, 0]}, {-externalgenes + 200, RGBColor[0, 0, 0]}}},
    PlotRange -> {{0, 0.1}, {135, -externalgenes + 1 - 135}},
    DisplayFunction -> Identity],
  g = FullGraphics[g],
  g[[1, 2]] = g[[1, 2]] /.
    Text[labely, {b_, c_}, {1., 0.}] ->
    Text[labely, {b, c}, {0, 0}, {0, 1}],
  g[[1, 2]] = g[[1, 2]] /.
    Text[labelx, {b_, c_}, {0., -1.}] ->
    Text[labelx, {b, c + 1600}, {0, -1}, {1, 0}],
  g[[1, 2]] = g[[1, 2]] /.
    Text[a_, {b_, c_}, {0., -1.}] ->
    Text[a, {b, c + 700}, {0, 0}, {0, 1}],
  p[[n]] = Show[g,
    PlotRange -> All,
    AspectRatio -> 2 / 1.2 / GoldenRatio,
    DisplayFunction -> Identity]
}, {n, 1, externalarrays}];
```

(\* Display Sorted External Arrays \*)

```
Show[Table[p[[a]], {a, 1, externalarrays}],  
      DisplayFunction -> $DisplayFunction];
```

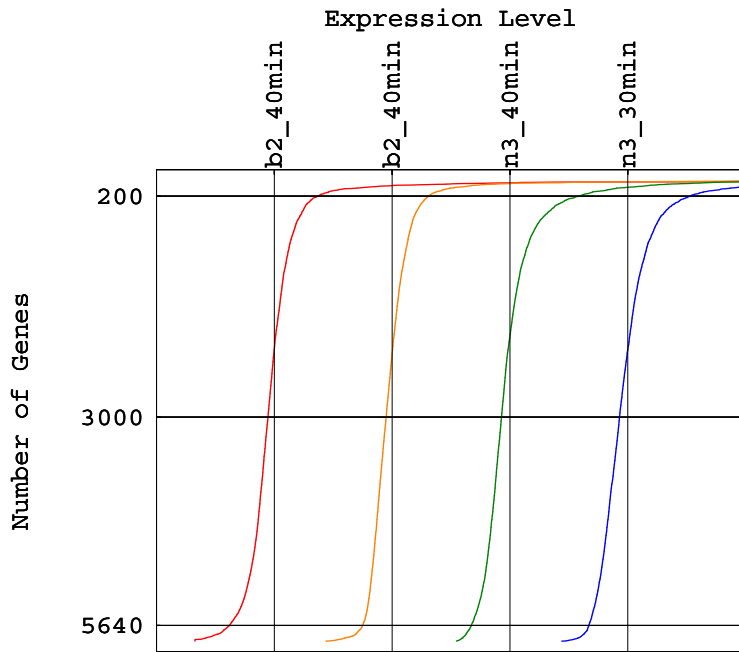

(\* Estimate Significance of Association of External Data with the Cell Cycle \*)

(\* Use Microarray Classification of Yeast Genes \*)

```
most = 200;
genenames = TakeColumns[externalgenenames, {2}];
stages = {"M/G1", "G1", "S", "S/G2", "G2/M", "None"};
numbers = Flatten[Table[{Count[Flatten[genenames], stages[[a]]], {a, 1, Dimensions[stages][[1]]}]];
genelet = Table[{a}, {a, 1, externalarrays}];
probability = Table[{0}, {a, 1, Dimensions[genelet][[1]]}];
parallelannotation = Table[{0}, {a, 1, Dimensions[genelet][[1]]}];
parallelprobability = Table[{0}, {a, 1, Dimensions[genelet][[1]]}];
antiannotation = Table[{0}, {a, 1, Dimensions[genelet][[1]]}];
antiprobability = Table[{0}, {a, 1, Dimensions[genelet][[1]]}];

Do[{
  arraylet = TakeColumns[Sort[
    AppendRows[TakeColumns[externalmatrix, genelet[[c]], genenames],
    OrderedQ[{{#2}, {#1}}] &], {2}],
  table = Table[{
    stages[[a]],
    numbers[[a]],
    Count[Flatten[TakeRows[arraylet, {1, most}]], stages[[a]]],
    {a, 1, Dimensions[stages][[1]]}],
  probability = Table[{
    Sum[N[Binomial[table[[a, 2]], b] * Binomial[externalgenes - table[[a, 2]], most - b] /
      Binomial[externalgenes, most]], {b, table[[a, 3]], most}],
    stages[[a]],
    {a, 1, Dimensions[stages][[1]]}],
  parallelannotation[[c]] = {Sort[probability, OrderedQ[{{#1}, {#2}}] &][[1, 2]]},
  parallelprobability[[c]] = {ScientificForm[Sort[probability, OrderedQ[{{#1}, {#2}}] &][[1, 1], 2]}},
  table = Table[{
    stages[[a]],
    numbers[[a]],
    Count[Flatten[TakeRows[arraylet, {externalgenes - most + 1, externalgenes}], stages[[a]]],
    {a, 1, Dimensions[stages][[1]]}],
  probability = Table[{
    Sum[N[Binomial[table[[a, 2]], b] * Binomial[externalgenes - table[[a, 2]], most - b] /
      Binomial[externalgenes, most]], {b, table[[a, 3]], most}],
    stages[[a]],
    {a, 1, Dimensions[stages][[1]]}],
  antiannotation[[c]] = {Sort[probability, OrderedQ[{{#1}, {#2}}] &][[1, 2]]},
  antiprobability[[c]] = {ScientificForm[Sort[probability, OrderedQ[{{#1}, {#2}}] &][[1, 1], 2]}},
  {c, 1, Dimensions[genelet][[1]]}

table1 = AppendRows [
  Table[{externalarraynames[[2, a]], {a, 1, externalarrays}},
  parallelannotation,
  parallelprobability,
  antiannotation,
  antiprobability];
```

(\* Use Traditional Classification of Yeast Genes \*)

```
most = 200;
genenames = TakeColumns[externalgenenames, {3}];
stages = {"M/G1", "G1", "S", "S/G2", "G2/M", "None"};
numbers = Flatten[Table[{Count[Flatten[genenames], stages[[a]]]}, {a, 1, Dimensions[stages][[1]]}]];
genelet = Table[{a}, {a, 1, externalarrays}];
probability = Table[{0}, {a, 1, Dimensions[genelet][[1]]}];
parallelannotation = Table[{0}, {a, 1, Dimensions[genelet][[1]]}];
parallelprobability = Table[{0}, {a, 1, Dimensions[genelet][[1]]}];
antiannotation = Table[{0}, {a, 1, Dimensions[genelet][[1]]}];
antiprobability = Table[{0}, {a, 1, Dimensions[genelet][[1]]}];

Do[{
  arraylet = TakeColumns[Sort[
    AppendRows[TakeColumns[externalmatrix, genelet[[c]], genenames],
    OrderedQ[{{#2}, {#1}}] &], {2}],
  table = Table[{
    stages[[a]],
    numbers[[a]],
    Count[Flatten[TakeRows[arraylet, {1, most}]], stages[[a]]],
    {a, 1, Dimensions[stages][[1]]}],
  probability = Table[{
    Sum[N[Binomial[table[[a, 2]], b] * Binomial[externalgenes - table[[a, 2]], most - b] /
      Binomial[externalgenes, most]], {b, table[[a, 3]], most}],
    stages[[a]],
    {a, 1, Dimensions[stages][[1]]}],
  parallelannotation[[c]] = {Sort[probability, OrderedQ[{{#1}, {#2}}] &][[1, 2]]},
  parallelprobability[[c]] = {ScientificForm[Sort[probability, OrderedQ[{{#1}, {#2}}] &][[1, 1]], 2]},
  table = Table[{
    stages[[a]],
    numbers[[a]],
    Count[Flatten[TakeRows[arraylet, {externalgenes - most + 1, externalgenes}]], stages[[a]]],
    {a, 1, Dimensions[stages][[1]]}],
  probability = Table[{
    Sum[N[Binomial[table[[a, 2]], b] * Binomial[externalgenes - table[[a, 2]], most - b] /
      Binomial[externalgenes, most]], {b, table[[a, 3]], most}],
    stages[[a]],
    {a, 1, Dimensions[stages][[1]]}],
  antiannotation[[c]] = {Sort[probability, OrderedQ[{{#1}, {#2}}] &][[1, 2]]},
  antiprobability[[c]] = {ScientificForm[Sort[probability, OrderedQ[{{#1}, {#2}}] &][[1, 1]], 2]},
  {c, 1, Dimensions[genelet][[1]]}

table2 = AppendRows[
  Table[{externalarraynames[[2, a]], {a, 1, externalarrays}},
  parallelannotation,
  parallelprobability,
  antiannotation,
  antiprobability];
```

(\* Display Significance of Association of External Arrays with the Cell Cycle \*)

```

headerx = {{
  ColumnForm[{" ", " ", " "}, Left],
  ColumnForm[{" ", " ", "Classification"}, Left],
  ColumnForm[{" ", "External", "Array"}, Left],
  ColumnForm[{"Most Likely", "Parallel", "Association"}, Left],
  ColumnForm[{"P-Value of", "Parallel", "Association"}, Left],
  ColumnForm[{"Most Likely", "Antiparallel", "Association"}, Left],
  ColumnForm[{"P-Value of", "Antiparallel", "Association"}, Left]},
{" ", " ", " ", " ", " ", " ", " ", " ", " ", " "}};
spacerx = {" ", " ", " ", " ", " "};
headery = Table[" ", {a, 1, 2 * externalarrays + 1}, {b, 1, 2}];
headery[[1]] = {"(a)", "Microarray"};
headery[[externalarrays + 2]] = {"(b)", "Traditional"};
association =
  AppendColumns[headerx,
  AppendRows[headery,
  AppendColumns[table1, spacerx, table2]]];
TableForm[association, TableSpacing -> {1, 1}]

```

|     | Classification | External Array | Most Likely Parallel Association | P-Value of Parallel Association | Most Likely Antiparallel Association | P-Value of Antiparallel Association |
|-----|----------------|----------------|----------------------------------|---------------------------------|--------------------------------------|-------------------------------------|
| (a) | Microarray     | b2_40min       | G2/M                             | $2.1 \times 10^{-67}$           | G1                                   | $7.3 \times 10^{-26}$               |
|     |                | b2_40min       | G2/M                             | $1. \times 10^{-55}$            | G1                                   | $1.2 \times 10^{-31}$               |
|     |                | n3_40min       | G1                               | $1.2 \times 10^{-61}$           | M/G1                                 | $6.5 \times 10^{-13}$               |
|     |                | n3_30min       | G1                               | $5.1 \times 10^{-48}$           | G2/M                                 | $4.5 \times 10^{-18}$               |
| (b) | Traditional    | b2_40min       | G2/M                             | $7. \times 10^{-14}$            | G1                                   | $9.2 \times 10^{-9}$                |
|     |                | b2_40min       | G2/M                             | $7. \times 10^{-14}$            | G1                                   | $2. \times 10^{-14}$                |
|     |                | n3_40min       | G1                               | $5.2 \times 10^{-27}$           | G2/M                                 | $1. \times 10^{-4}$                 |
|     |                | n3_30min       | G1                               | $1.1 \times 10^{-15}$           | G2/M                                 | $1. \times 10^{-4}$                 |

(\* GSVD Sort External Arrays \*)

```
genes = genes1;
genenames = TakeColumns[genenames1, 1];
arrays = arrays1;
arraynames = arraynames1;

externalgenenames = TakeColumns[externalgenenames, 1];
list = Flatten[Intersection[genenames, externalgenenames]];
{partialgenes} = Dimensions[list]

{4383}

counter = Table[{Position[genenames, list[[a]]][[1, 1]], list[[a]]}, {a, 1, partialgenes}];
counter = ReplaceAll[counter, {} -> {Null}];
counter = Sort[counter, OrderedQ[{{#1, #2}} &];
list = Flatten[TakeColumns[counter, {2}]];

counter = Table[Flatten[Position[list, genenames[[a, 1]]], {a, 1, genes}];
counter = ReplaceAll[counter, {} -> {Null}];
partialarraylets = AppendRows[counter, gsvdphases, genenames, arraylets1];
partialarraylets = Sort[partialarraylets, OrderedQ[{{#1, #2}} &];
partialphases = TakeRows[
  TakeColumns[partialarraylets, {2, 2}],
  {1, partialgenes}];
partialgenenames = TakeRows[
  TakeColumns[partialarraylets, {3, 3}],
  {1, partialgenes}];
partialarraylets = TakeRows[
  TakeColumns[partialarraylets, {4, arrays + 3}],
  {1, partialgenes}];

counter = Table[Flatten[Position[list, externalgenenames[[a, 1]]], {a, 1, externalgenes}];
counter = ReplaceAll[counter, {} -> {Null}];
partialexternalmatrix = AppendRows[counter, externalgenenames, externalmatrix];
partialexternalmatrix = Sort[partialexternalmatrix, OrderedQ[{{#1, #2}} &];
partialexternalgenenames = TakeRows[
  TakeColumns[partialexternalmatrix, {2, 2}],
  {1, partialgenes}];
partialexternalmatrix = TakeRows[
  TakeColumns[partialexternalmatrix, {3, externalarrays + 2}],
  {1, partialgenes}];
```

(\* Project Data Onto GSVD Basis and Calculate Contributions of Arraylets to External Arrays \*)

```
partialarraylets = Transpose[partialarraylets];
average = Table[1, {a, 1, partialgenes}];
average = N[average / Sqrt[Dot[average, average]]];
partialarraylets =
  partialarraylets - N[Outer[Times, Dot[partialarraylets, average], average]];
partialarraylets = Transpose[partialarraylets];

arraycontributions = Dot[PseudoInverse[partialarraylets], partialexternalmatrix];
average = Table[1, {a, 1, externalarrays}];
average = N[average / Sqrt[Dot[average, average]]];
arraycontributions =
  arraycontributions - N[Outer[Times, Dot[arraycontributions, average], average]];
```

(\* Project Arrays from 6 D Arraylets Subspace Onto 2 D Subspace \*)

```
externalcoordinates = Table[{  
  (-Sqrt[3] * (arraycontributions[[3, a]] - arraycontributions[[15, a]]) +  
    2 * Sqrt[3] * (arraycontributions[[4, a]] - arraycontributions[[16, a]]) +  
    (3 * arraycontributions[[5, a]] + Sqrt[3] * arraycontributions[[14, a]])) / 6 /  
  Sqrt[(arraycontributions[[3, a]] - arraycontributions[[15, a]])^2 / 3 +  
    (arraycontributions[[4, a]] - arraycontributions[[16, a]])^2 / 3 +  
    (arraycontributions[[5, a]] + arraycontributions[[14, a]] / Sqrt[3])^2 +  
    Abs[(arraycontributions[[3, a]] - arraycontributions[[15, a]]) / Sqrt[3] *  
      (arraycontributions[[4, a]] - arraycontributions[[16, a]]) / Sqrt[3] +  
    Abs[(arraycontributions[[3, a]] - arraycontributions[[15, a]]) / Sqrt[3] *  
      (arraycontributions[[5, a]] + arraycontributions[[14, a]] / Sqrt[3])] +  
    Abs[(arraycontributions[[4, a]] - arraycontributions[[16, a]]) / Sqrt[3] *  
      (arraycontributions[[5, a]] + arraycontributions[[14, a]] / Sqrt[3])]],  
  (3 * (arraycontributions[[3, a]] - arraycontributions[[15, a]]) +  
    Sqrt[3] * (3 * arraycontributions[[5, a]] + Sqrt[3] * arraycontributions[[14, a]])) / 6 /  
  Sqrt[(arraycontributions[[3, a]] - arraycontributions[[15, a]])^2 / 3 +  
    (arraycontributions[[4, a]] - arraycontributions[[16, a]])^2 / 3 +  
    (arraycontributions[[5, a]] + arraycontributions[[14, a]] / Sqrt[3])^2 +  
    Abs[(arraycontributions[[3, a]] - arraycontributions[[15, a]]) / Sqrt[3] *  
      (arraycontributions[[4, a]] - arraycontributions[[16, a]]) / Sqrt[3] +  
    Abs[(arraycontributions[[3, a]] - arraycontributions[[15, a]]) / Sqrt[3] *  
      (arraycontributions[[5, a]] + arraycontributions[[14, a]] / Sqrt[3])] +  
    Abs[(arraycontributions[[4, a]] - arraycontributions[[16, a]]) / Sqrt[3] *  
      (arraycontributions[[5, a]] + arraycontributions[[14, a]] / Sqrt[3])]],  
  {a, 1, externalarrays}];
```

(\* Create Parameter Graph of Arrays Projected Onto 2 D Subspace \*)

```
coordinates = gsvdcoordinates;
arrays = gsvdarrays;

points1 = {Point[coordinates[[2]], Point[coordinates[[11]]]};
points2 = {Point[coordinates[[3]], Point[coordinates[[4]], Point[coordinates[[5]],
  Point[coordinates[[12]], Point[coordinates[[13]], Point[coordinates[[14]]]};
points3 = {Point[coordinates[[6]], Point[coordinates[[15]]]};
points4 = {Point[coordinates[[7]]]};
points5 = {Point[coordinates[[1]], Point[coordinates[[8]], Point[coordinates[[9]],
  Point[coordinates[[10]], Point[coordinates[[16]], Point[coordinates[[17]],
  Point[coordinates[[18]]]};
points6 = {Point[externalcoordinates[[1]], Point[externalcoordinates[[2]]]};
points7 = {Point[externalcoordinates[[3]], Point[externalcoordinates[[4]]]};
textcoordinates = Flatten[{coordinates, externalcoordinates}, 1];
Do[
  textcoordinates[[a, 1]] = If[
    textcoordinates[[a, 1]] > 0,
    textcoordinates[[a, 1]] - 0.085,
    textcoordinates[[a, 1]] + 0.095],
  {a, 1, 9}];
Do[
  textcoordinates[[a, 1]] =
  If[textcoordinates[[a, 1]] > 0,
    textcoordinates[[a, 1]] - 0.11,
    textcoordinates[[a, 1]] + 0.12],
  {a, 10, arrays + externalarrays}];
textcoordinates[[3]] = textcoordinates[[3]] + {0.18, -0.06};
textcoordinates[[5]] = textcoordinates[[5]] + {-0.22, 0};
textcoordinates[[6]] = textcoordinates[[6]] + {-0.06, 0.1};
textcoordinates[[7]] = textcoordinates[[7]] + {0.1, -0.095};
textcoordinates[[8]] = textcoordinates[[8]] + {0.16, -0.085};
textcoordinates[[9]] = textcoordinates[[9]] + {0.1, -0.1};
textcoordinates[[11]] = textcoordinates[[11]] + {0.23, 0};
textcoordinates[[15]] = textcoordinates[[15]] - {0.23, 0};
textcoordinates[[16]] = textcoordinates[[16]] - {0.23, 0.06};
textcoordinates[[19]] = textcoordinates[[19]] + {0, 0.02};
textcoordinates[[21]] = textcoordinates[[21]] - {0, 0.08};
textcoordinates[[22]] = textcoordinates[[22]] - {0, 0.04};
```



```

texts = Table[Text[a, textcoordinates[[a]], {a, 1, arrays + externalarrays}];
p = Show[
  {Graphics[{RGBColor[1, 1, 0], PointSize[0.035], points1}],
  Graphics[{RGBColor[0, 0.5, 0], PointSize[0.035], points2}],
  Graphics[{RGBColor[0, 0, 1], PointSize[0.035], points3}],
  Graphics[{RGBColor[1, 0, 0], PointSize[0.035], points4}],
  Graphics[{RGBColor[1, 0.5, 0], PointSize[0.035], points5}],
  Graphics[{RGBColor[1, 0.5, 0], PointSize[0.035], points6}],
  Graphics[{RGBColor[0, 0.5, 0], PointSize[0.035], points7}],
  Graphics[{RGBColor[1, 0.5, 0], Text["G2/M", {1.075, -0.52}]}],
  Graphics[{RGBColor[0, 0, 0], Text["M/G1", {0.9, 0.75}]}],
  Graphics[{RGBColor[1, 0, 0], Text["S/G2", {0.1, -1.12}]}],
  Graphics[{RGBColor[0, 0, 1], Text["S", {-0.95, -0.6}]}],
  Graphics[{RGBColor[0, 0.5, 0], Text["G1", {-0.8, 0.8}]}],
  Graphics[{RGBColor[0, 0, 0], Text["(b)", {-1.1, 1.15}]}],
  Graphics[{RGBColor[0, 0, 0], Text[" $\phi=\pi/3$ ", {0.925, 1.15}]}],
  Graphics[{RGBColor[0, 0, 0], Text[" $\phi=0$ ", {1.12, 0.12}]}],
  Graphics[{RGBColor[0, 0, 0], Text[" $\phi=-\pi/3$ ", {0.925, -1.15}]}],
  Graphics[texts],
  Graphics[{RGBColor[0, 0, 0], Arrow[{1.12, -0.15}, externalcoordinates[[1]],
    HeadCenter -> 0.5, HeadLength -> 0.035, HeadWidth -> 0.75]}],
  Graphics[{RGBColor[0, 0, 0], Arrow[{1.12, -0.15}, externalcoordinates[[2]],
    HeadCenter -> 0.5, HeadLength -> 0.035, HeadWidth -> 0.75]}],
  Graphics[{RGBColor[0, 0, 0], Text["CLB2", {1.12, -0.25}]}],
  Graphics[{RGBColor[0, 0, 0], Arrow[{-1.12, 0.125}, externalcoordinates[[3]],
    HeadCenter -> 0.5, HeadLength -> 0.035, HeadWidth -> 0.75]}],
  Graphics[{RGBColor[0, 0, 0], Arrow[{-1.12, 0.125}, externalcoordinates[[4]],
    HeadCenter -> 0.5, HeadLength -> 0.035, HeadWidth -> 0.75]}],
  Graphics[{RGBColor[0, 0, 0], Text["CLN3", {-1.12, 0.175}]}],
  Graphics[{RGBColor[0, 0, 0], Dashing[{0.03, 0.02}], Circle[{0, 0}, 0.5]}],
  Graphics[{RGBColor[0, 0, 0], Dashing[{0.03, 0.02}], Circle[{0, 0}, 1]}],
  Graphics[{RGBColor[0, 0, 0], Arrow[{-1.25 / Tan[Pi / 3.], 1.25}, {1.25 / Tan[Pi / 3.], -1.25},
    HeadCenter -> 0.5, HeadLength -> 0.035, HeadWidth -> 0.75]}],
  Graphics[{RGBColor[0, 0, 0], Arrow[{-1.25, 0}, {1.25, 0},
    HeadCenter -> 0.5, HeadLength -> 0.035, HeadWidth -> 0.75]}],
  Graphics[{RGBColor[0, 0, 0], Arrow[{-1.25 / Tan[Pi / 3.], -1.25}, {1.25 / Tan[Pi / 3.], 1.25},
    HeadCenter -> 0.5, HeadLength -> 0.035, HeadWidth -> 0.75]}],
  Graphics[{RGBColor[0, 0, 0], Circle[{0, 0}, 0.4,
    {ArcTan[coordinates[[1, 2]] / coordinates[[1, 1]]],
    ArcTan[coordinates[[3, 2]] / coordinates[[3, 1]]}]}],
  Graphics[{RGBColor[0, 0, 0], Arrow[
    {0.4 * Cos[-0.05 + ArcTan[coordinates[[3, 2]] / coordinates[[3, 1]]]],
    0.4 * Sin[-0.05 + ArcTan[coordinates[[3, 2]] / coordinates[[3, 1]]]],
    {0.4 * Cos[ArcTan[coordinates[[3, 2]] / coordinates[[3, 1]]]],
    0.4 * Sin[ArcTan[coordinates[[3, 2]] / coordinates[[3, 1]]]],
    HeadCenter -> 0.5, HeadLength -> 0.035, HeadWidth -> 0.75}]}],
  AspectRatio -> 1,
  PlotRange -> {{-1.25, 1.25}, {-1.25, 1.25}},
  Frame -> True,
  FrameTicks -> False,
  FrameLabel -> {None, None, None, None},
  GridLines -> {None, {{0, RGBColor[0, 0, 0]}}},
  DisplayFunction -> Identity];
p = FullGraphics[p];
p[[1, 2]] = p[[1, 2]] /.
  Text[labely, {b_, c_}, {1., 0.}] ->
  Text[labely, {-1.18, 0}, {0, 0}, {0, 1}];
s2 = Show[p,
  AspectRatio -> 1.0,
  PlotRange -> All,
  DisplayFunction -> Identity];

```

(\* Classify GSVD Gene Phases into Cell Cycle Phases \*)

```
ph1 = 0;  
ph2 = -1 / 2.;  
ph3 = -1.;  
ph4 = -4 / 3.;  
ph5 = -5 / 3.;
```

```
endph5 = partialgenes;  
beginph1 = 1;  
partialphases[[endph5]] - ph1  
partialphases[[beginph1]] - ph1
```

```
{0.0000468343}
```

```
{-0.000239433}
```

```
endph1 = 1068;  
beginph2 = 1069;  
partialphases[[endph1]] - ph2  
partialphases[[beginph2]] - ph2
```

```
{0.00152245}
```

```
{0.999794}
```

```
endph2 = 2044;  
beginph3 = 2045;  
partialphases[[endph2]] - ph3  
partialphases[[beginph3]] - ph3
```

```
{1.0003}
```

```
{0.999906}
```

```
endph3 = 2729;  
beginph4 = 2730;  
partialphases[[endph3]] - ph4  
partialphases[[beginph4]] - ph4
```

```
{1.0009}
```

```
{0.99987}
```

```
endph4 = 3713;  
beginph5 = 3714;  
partialphases[[endph4]] - ph5  
partialphases[[beginph5]] - ph5
```

```
{2.00019}
```

```
{1.99935}
```

(\* 4383 yeast genes, 1068 in M/G1, 976 in G1, 685 in S, 984 in S/G2, 670 in G2/M. \*)

```
(* Display GSVD Reconstructed Sorted External Data *)
```

```
(* GSVD Reconstruct Sorted External Data *)
```

```
subspace = Table[0, {a, 1, arrays}];  
Do[subspace[[a]] = 1, {a, 3, 5}];  
Do[subspace[[a]] = 1, {a, 14, 16}];  
matrix = Dot[partialarraylets, Dot[DiagonalMatrix[subspace], arraycontributions]];
```

```
(* Center GSVD Reconstructed Sorted External Data *)
```

```
average = Table[1, {a, 1, externalarrays}];  
average = N[average / Sqrt[Dot[average, average]]];  
matrix = matrix - N[Outer[Times, Dot[matrix, average], average]];  
matrix = Transpose[matrix];  
average = Table[1, {a, 1, partialgenes}];  
average = N[average / Sqrt[Dot[average, average]]];  
matrix = matrix - N[Outer[Times, Dot[matrix, average], average]];  
matrix = Transpose[matrix];
```

```
(* Create GSVD Reconstructed Sorted External Data 2D Red & Green Raster Display *)
```

```
contrast = 10 * 1.5;  
displaying = Table[  
  If[contrast * matrix[[i, j]] > 0,  
    If[contrast * matrix[[i, j]] < 1, {contrast * matrix[[i, j]], 0}, {1, 0}],  
    If[contrast * matrix[[i, j]] > -1, {0, -contrast * matrix[[i, j]]}, {0, 1}]],  
  {i, 1, partialgenes}, {j, 1, externalarrays}];  
framex = Table[{a - 0.5, externalarraynames[[2, a]]}, {a, 1, externalarrays}];  
framey = {  
  {partialgenes - endph1 / 2, "M/G1"},  
  {partialgenes - (endph1 + endph2) / 2, "G1"},  
  {partialgenes - (endph2 + endph3) / 2, "S"},  
  {partialgenes - (endph3 + endph4) / 2, "S/G2"},  
  {(partialgenes - endph4) / 2, "G2/M"}}];  
gridy = {  
  {partialgenes - endph1 + 0.5, {RGBColor[0, 0, 0]}},  
  {partialgenes - endph2 + 0.5, {RGBColor[0, 0, 0]}},  
  {partialgenes - endph3 + 0.5, {RGBColor[0, 0, 0]}},  
  {partialgenes - endph4 + 0.5, {RGBColor[0, 0, 0]}}];  
labelx = "(c) Arrays";  
labely = ColumnForm[{" ", "Genes", " ", " ", " ", " ", " ", " ", " "}, Center];  
g = Show[  
  Graphics[  
    RasterArray[  
      Table[  
        RGBColor[displaying[[i, j, 1]], displaying[[i, j, 2]], 0],  
        {i, partialgenes, 1, -1}, {j, 1, externalarrays}]]],  
  AspectRatio -> 1,  
  Frame -> True,  
  FrameTicks -> {None, framey, framex, None},  
  FrameLabel -> {None, labely, labelx, None},  
  GridLines -> {None, gridy},  
  DisplayFunction -> Identity];
```

```

g = FullGraphics[g];
g[[1, 2]] = g[[1, 2]] /.
  Text[labely, {b_, c_}, {1., 0.}] →
  Text[labely, {b, c}, {0, 0}, {0, 1}];
g[[1, 2]] = g[[1, 2]] /.
  Text[a_, {b_, c_}, {1., 0.}] →
  Text[a, {b - 0.4, c}, {0, 0}, {0, 1}];
g[[1, 2]] = g[[1, 2]] /.
  Text[labelx, {b_, c_}, {0., -1.}] →
  Text[labelx, {b, c + 2200}, {0, -1}, {1, 0}];
g[[1, 2]] = g[[1, 2]] /.
  Text[a_, {b_, c_}, {0., -1.}] →
  Text[a, {b, c + 1100}, {0, 0}, {0, 1}];
g3 = Show[g,
  AspectRatio -> GoldenRatio * 1.2,
  PlotRange -> All,
  DisplayFunction -> Identity];

(* Create GSVD Reconstructed Sorted External Data Graph Display *)

matrix = Transpose[matrix];
matrixplot = Table[0, {a, 1, externalarrays}];
Do[
  matrixplot[[a]] = Chop[TrigFit[matrix[[a]], 1, {x, partialgenes - 1}], 0.05],
  {a, 1, externalarrays}]
table = Table[
  {externalarraynames[[2, a]], matrixplot[[a]]}, {a, 1, externalarrays}];
TableForm[table]

b2_40min      0.210075 Cos[ $\frac{\pi x}{2191}$ ]
b2_40min      0.174958 Cos[ $\frac{\pi x}{2191}$ ] - 0.0545018 Sin[ $\frac{\pi x}{2191}$ ]
n3_40min      -0.277423 Cos[ $\frac{\pi x}{2191}$ ] + 0.0549437 Sin[ $\frac{\pi x}{2191}$ ]
n3_30min      -0.107609 Cos[ $\frac{\pi x}{2191}$ ]

p = Table[0, {a, 1, externalarrays}];
color = {
  RGBColor[0.75, 0, 1],
  RGBColor[1, 0, 0],
  RGBColor[1, 0.5, 0],
  RGBColor[0, 0.5, 0],
  RGBColor[0, 0, 1]};
labelx = "(d) Expression Level";
framex = Table[{1 * a, externalarraynames[[2, a]]},
  {a, 1, externalarrays}];

```

```

Do[{
  graph = ParametricPlot[{matrixplot[[n]] + 1 * n, -x},
    {x, 0, partialgenes - 1},
    PlotStyle -> {RGBColor[0, 0, 0]},
    DisplayFunction -> Identity],
  coordinates = Table[
    If[matrix[[n, a]] + 1 * n < 0, 0,
      If[matrix[[n, a]] + 1 * n > 5, 5,
        matrix[[n, a]] + 1 * n]],
    {a, 1, partialgenes}],
  coordinates = Table[{coordinates[[a]], -a + 1}, {a, 1, partialgenes}],
  line = Line[coordinates],
  g = Show[{
    Graphics[{color[[Mod[n, 5] + 1]], line}],
    graph},
  Frame -> True,
  FrameLabel -> {None, None, labelx, None},
  FrameTicks -> {None, None, framex, None},
  GridLines -> {{1 * n, RGBColor[0, 0, 0]}, None},
  PlotRange -> {{0, 5}, {95, -partialgenes + 1 - 95}},
  DisplayFunction -> Identity],
  g = FullGraphics[g],
  g[[1, 2]] = g[[1, 2]] /.
  Text[labely, {b_, c_}, {1., 0.}] ->
  Text[labely, {b, c}, {0, 0}, {0, 1}],
  g[[1, 2]] = g[[1, 2]] /.
  Text[labelx, {b_, c_}, {0., -1.}] ->
  Text[labelx, {b, c + 2200}, {0, -1}, {1, 0}],
  g[[1, 2]] = g[[1, 2]] /.
  Text[a_, {b_, c_}, {0., -1.}] ->
  Text[a, {b, c + 1100}, {0, 0}, {0, 1}],
  p[[n]] = Show[g,
    AspectRatio -> GoldenRatio * 1.2 / 1.5,
    PlotRange -> All,
    DisplayFunction -> Identity]
}, {n, 1, externalarrays}];

g4 = Show[Table[p[[a]], {a, 1, externalarrays}],
  DisplayFunction -> Identity];

```

(\* Create GSVD Basis External Array Correlations Bar Chart Display \*)

```

partialarraylets = Transpose[partialarraylets];
partialarraylets = Drop[partialarraylets, {17, 18}];
partialarraylets = Drop[partialarraylets, {6, 13}];
partialarraylets = Drop[partialarraylets, {1, 2}];
partialarraylets = Transpose[partialarraylets];

average = Table[1, {a, 1, externalarrays}];
average = N[average / Sqrt[Dot[average, average]]];
partialexternalmatrix =
  partialexternalmatrix - N[Outer[Times, Dot[partialexternalmatrix, average], average]];
partialexternalmatrix = Transpose[partialexternalmatrix];
average = Table[1, {a, 1, partialgenes}];
average = N[average / Sqrt[Dot[average, average]]];
partialexternalmatrix =
  partialexternalmatrix - N[Outer[Times, Dot[partialexternalmatrix, average], average]];
partialexternalmatrix = Transpose[partialexternalmatrix];

```

```

u = Transpose[SingularValues[partialarraylets][[1]]];
gsvdcorrelation =
  Table[
    Sqrt[
      Sum[(Dot[Transpose[partialexternalmatrix][[a]], u]^2)[[b]], {b, 1, 6}] /
      Dot[Transpose[partialexternalmatrix][[a]], Transpose[partialexternalmatrix][[a]]],
      {a, 1, externalarrays}];
Sort[gsvdcorrelation, OrderedQ[{{#2}, {#1}}] &][[1]]

0.43626

limit = 0.5;

gridx = Table[a, {a, 0, limit, limit/5.}];
framex = gridx;
sizes = Flatten[
  Table[
    Dimensions[
      Characters[
        ToString[framex[[a]]
        ]], {a, 1, 6}]]];
Do[
  Do[framex[[a]] = StringJoin[ToString[framex[[a]]], " "],
  {b, 1, size - sizes[[a]]},
  {a, 1, 6}];
framex = Table[{gridx[[a]], framex[[a]]}, {a, 1, 6}];
gridx = Table[{gridx[[a]], RGBColor[0, 0, 0]}, {a, 1, 6}];
framey = Table[{a + 1, externalarrays - a}, {a, 0, externalarrays - 1}];
labelx = "(b) GSVD Basis Correlation";
labely = " ";
g = BarChart[
  Table[gsvdcorrelation[[externalarrays - a]], {a, 0, externalarrays - 1}],
  BarOrientation -> Horizontal,
  PlotRange -> {{0, limit + 0.001}, {0.5, externalarrays + 0.5}},
  AspectRatio -> 1,
  Axes -> False,
  Frame -> True,
  FrameTicks -> {None, framey, framex, None},
  FrameLabel -> {None, labely, labelx, None},
  GridLines -> {gridx, None},
  DisplayFunction -> Identity];
g = FullGraphics[g];
g[[1, 2]] = g[[1, 2]] /.
  Text[labely, {b_, c_}, {1., 0.}] ->
  Text[labely, {b - limit/5., c}, {0, 0}, {0, 1}];
g[[1, 2]] = g[[1, 2]] /.
  Text[labelx, {b_, c_}, {0., -1.}] ->
  Text[labelx, {b, c + 0.88}, {0, -1}, {1, 0}];
g[[1, 2]] = g[[1, 2]] /.
  Text[a_, {b_, c_}, {0., -1.}] ->
  Text[a, {b, c + 0.66}, {0, 0}, {0, 1}];
q4 = Show[g,
  AspectRatio -> 1.05,
  PlotRange -> All,
  DisplayFunction -> Identity];

```

```
(* SVD Sort External Arrays *)
```

```
genes = genes2;  
genenames = TakeColumns[genenames2, 1];  
arrays = arrays2;  
arraynames = arraynames2;  
  
externalgenenames = TakeColumns[externalgenenames, 1];  
list = Flatten[Intersection[genenames, externalgenenames]];  
{partialgenes} = Dimensions[list]  
  
{4404}  
  
counter = Table[{Position[genenames, list[[a]]][[1, 1]], list[[a]]}, {a, 1, partialgenes}];  
counter = ReplaceAll[counter, {} -> {Null}];  
counter = Sort[counter, OrderedQ[{{#1, #2}} &];  
list = Flatten[TakeColumns[counter, {2}]];  
  
counter = Table[Flatten[Position[list, genenames[[a, 1]]], {a, 1, genes}];  
counter = ReplaceAll[counter, {} -> {Null}];  
partialeigenarrays = AppendRows[counter, svdphases, genenames, eigenarrays];  
partialeigenarrays = Sort[partialeigenarrays, OrderedQ[{{#1, #2}} &];  
partialphases = TakeRows [  
  TakeColumns[partialeigenarrays, {2, 2}],  
  {1, partialgenes}];  
partialgenenames = TakeRows [  
  TakeColumns[partialeigenarrays, {3, 3}],  
  {1, partialgenes}];  
partialeigenarrays = TakeRows [  
  TakeColumns[partialeigenarrays, {4, arrays + 3}],  
  {1, partialgenes}];  
partialeigenarrays = TakeColumns[partialeigenarrays, {1, 6}];  
  
counter = Table[Flatten[Position[list, externalgenenames[[a, 1]]], {a, 1, externalgenes}];  
counter = ReplaceAll[counter, {} -> {Null}];  
partialexternalmatrix = AppendRows[counter, externalgenenames, externalmatrix];  
partialexternalmatrix = Sort[partialexternalmatrix, OrderedQ[{{#1, #2}} &];  
partialexternalgenenames = TakeRows [  
  TakeColumns[partialexternalmatrix, {2, 2}],  
  {1, partialgenes}];  
partialexternalmatrix = TakeRows [  
  TakeColumns[partialexternalmatrix, {3, externalarrays + 2}],  
  {1, partialgenes}];
```

```
(* Center Gene Data *)
```

```
average = Table[1, {a, 1, externalarrays}];  
average = N[average / Sqrt[Dot[average, average]]];  
partialexternalmatrix =  
  partialexternalmatrix - N[Outer[Times, Dot[partialexternalmatrix, average], average]];
```

```
(* Center Array Data *)
```

```
partialexternalmatrix = Transpose[partialexternalmatrix];  
average = Table[1, {a, 1, partialgenes}];  
average = N[average / Sqrt[Dot[average, average]]];  
partialexternalmatrix =  
  partialexternalmatrix - N[Outer[Times, Dot[partialexternalmatrix, average], average]];  
partialexternalmatrix = Transpose[partialexternalmatrix];
```

(\* Create SVD Basis External Array Correlations Bar Chart Display \*)

```
u = Transpose[SingularValues[partialeigenarrays][[1]]];
svdcorrelation =
  Table[
    Sqrt[
      Sum[(Dot[Transpose[partialexternalmatrix][[a]], u]^2)[[b]], {b, 1, 6}] /
      Dot[Transpose[partialexternalmatrix][[a]], Transpose[partialexternalmatrix][[a]]],
      {a, 1, externalarrays}];
Sort[svdcorrelation, OrderedQ[{{#2}, {#1}}] &][[1]]

0.590854

limit = 0.6;

gridx = Table[a, {a, 0, limit, limit/5.}];
framex = gridx;
sizes = Flatten[
  Table[
    Dimensions[
      Characters[
        ToString[framex[[a]]
      ]], {a, 1, 6}]];
Do[
  Do[framex[[a]] = StringJoin[ToString[framex[[a]]], " "],
  {b, 1, size - sizes[[a]]},
  {a, 1, 6}];
framex = Table[{gridx[[a]], framex[[a]]}, {a, 1, 6}];
gridx = Table[{gridx[[a]], RGBColor[0, 0, 0]}, {a, 1, 6}];
framey = Table[{a + 1, externalarrays - a}, {a, 0, externalarrays - 1}];
labelx = "(a) SVD Basis Correlation";
labeledy = "Arrays";
g = BarChart[
  Table[svdcorrelation[[externalarrays - a]], {a, 0, externalarrays - 1}],
  BarOrientation -> Horizontal,
  PlotRange -> {{0, limit + 0.001}, {0.5, externalarrays + 0.5}},
  AspectRatio -> 1,
  Axes -> False,
  Frame -> True,
  FrameTicks -> {None, framey, framex, None},
  FrameLabel -> {None, labeledy, labelx, None},
  GridLines -> {gridx, None},
  DisplayFunction -> Identity];
g = FullGraphics[g];
g[[1, 2]] = g[[1, 2]] /.
  Text[labeledy, {b_, c_}, {1., 0.}] ->
  Text[labeledy, {b - limit/5., c}, {0, 0}, {0, 1}];
g[[1, 2]] = g[[1, 2]] /.
  Text[labelx, {b_, c_}, {0., -1.}] ->
  Text[labelx, {b, c + 0.88}, {0, -1}, {1, 0}];
g[[1, 2]] = g[[1, 2]] /.
  Text[a_, {b_, c_}, {0., -1.}] ->
  Text[a, {b, c + 0.66}, {0, 0}, {0, 1}];
q3 = Show[g,
  AspectRatio -> 1.05,
  PlotRange -> All,
  DisplayFunction -> Identity];
```



```
(* Project Data Onto SVD Basis *)
```

```
externalarraycorrelations = Dot[PseudoInverse[partialeigenarrays], partialexternalmatrix];  
partialexternalmatrix = Dot[partialeigenarrays, externalarraycorrelations];
```

```
(* Calculate Contributions of Eigenarrays to External Arrays *)
```

```
partialexternalmatrix = Transpose[partialexternalmatrix];  
externalcoordinates = Table[  
  {externalarraycorrelations[[1, a]] /  
    Sqrt[Dot[partialexternalmatrix[[a]], partialexternalmatrix[[a]]]],  
    externalarraycorrelations[[2, a]] /  
    Sqrt[Dot[partialexternalmatrix[[a]], partialexternalmatrix[[a]]]]},  
  {a, 1, externalarrays}];  
partialexternalmatrix = Transpose[partialexternalmatrix];
```

```
(* Create Parameter Graph of Arrays Projected Onto 2 D Subspace *)
```

```
coordinates = svdcoordinates;  
arrays = svdarrays;  
  
points1 = {Point[coordinates[[2]], Point[coordinates[[11]]]};  
points2 = {Point[coordinates[[3]], Point[coordinates[[4]], Point[coordinates[[5]]],  
  Point[coordinates[[12]], Point[coordinates[[13]], Point[coordinates[[14]]]};  
points3 = {Point[coordinates[[6]], Point[coordinates[[15]]]};  
points4 = {Point[coordinates[[7]]]};  
points5 = {Point[coordinates[[1]], Point[coordinates[[8]], Point[coordinates[[9]],  
  Point[coordinates[[10]], Point[coordinates[[16]], Point[coordinates[[17]],  
  Point[coordinates[[18]]]};  
points6 = {Point[externalcoordinates[[1]], Point[externalcoordinates[[2]]]};  
points7 = {Point[externalcoordinates[[4]], Point[externalcoordinates[[3]]]};  
textcoordinates = Flatten[{coordinates, externalcoordinates}, 1];  
Do[  
  textcoordinates[[a, 1]] = If[  
    textcoordinates[[a, 1]] > 0,  
    textcoordinates[[a, 1]] - 0.085,  
    textcoordinates[[a, 1]] + 0.095],  
  {a, 1, 9}];  
Do[  
  textcoordinates[[a, 1]] =  
    If[textcoordinates[[a, 1]] > 0,  
    textcoordinates[[a, 1]] - 0.11,  
    textcoordinates[[a, 1]] + 0.12],  
  {a, 10, arrays + externalarrays}];  
textcoordinates[[1]] = textcoordinates[[1]] - {0.085, 0.1};  
textcoordinates[[2]] = textcoordinates[[2]] + {0.18, 0.04};  
textcoordinates[[3]] = textcoordinates[[3]] - {0, 0.04};  
textcoordinates[[6]] = textcoordinates[[6]] - {0.18, 0};  
textcoordinates[[7]] = textcoordinates[[7]] - {0.18, 0};  
textcoordinates[[9]] = textcoordinates[[9]] - {0, 0.04};  
textcoordinates[[12]] = textcoordinates[[12]] + {0, 0.04};  
textcoordinates[[13]] = textcoordinates[[13]] - {0.23, 0};  
textcoordinates[[14]] = textcoordinates[[14]] - {0.11, 0.13};  
textcoordinates[[17]] = textcoordinates[[17]] + {0.12, 0.1};  
textcoordinates[[19]] = textcoordinates[[19]] + {0.12, -0.12};  
textcoordinates[[20]] = textcoordinates[[20]] + {0.14, 0.12};  
textcoordinates[[21]] = textcoordinates[[21]] + {-0.12, 0.2};  
textcoordinates[[22]] = textcoordinates[[22]] + {0.04, 0.02};
```

```

texts = Table[Text[a, textcoordinates[[a]], {a, 1, arrays + externalarrays}];
p = Show[
  {Graphics[{RGBColor[1, 1, 0], PointSize[0.035], points1}],
  Graphics[{RGBColor[0, 0.5, 0], PointSize[0.035], points2}],
  Graphics[{RGBColor[0, 0, 1], PointSize[0.035], points3}],
  Graphics[{RGBColor[1, 0, 0], PointSize[0.035], points4}],
  Graphics[{RGBColor[1, 0.5, 0], PointSize[0.035], points5}],
  Graphics[{RGBColor[0, 0.5, 0], PointSize[0.035], points7}],
  Graphics[{RGBColor[1, 0.5, 0], PointSize[0.035], points6}],
  Graphics[{RGBColor[1, 0.5, 0], Text["G2/M", {1.075, -0.52}]}],
  Graphics[{RGBColor[0, 0, 0], Text["M/G1", {0.9, 0.75}]}],
  Graphics[{RGBColor[1, 0, 0], Text["S/G2", {0.2, -1.12}]}],
  Graphics[{RGBColor[0, 0, 1], Text["S", {-0.95, -0.6}]}],
  Graphics[{RGBColor[0, 0.5, 0], Text["G1", {-0.8, 0.8}]}],
  Graphics[{RGBColor[0, 0, 0], Text["(a)", {-1.1, 1.15}]}],
  Graphics[{RGBColor[0, 0, 0], Text[" $\phi = \pi/2$ ", {0.2, 1.12}]}],
  Graphics[{RGBColor[0, 0, 0], Text[" $\phi = 0$ ", {1.12, 0.12}]}],
  Graphics[texts],
  Graphics[{RGBColor[0, 0, 0], Arrow[{1.1, -0.26}, {0.7, -0.08}],
  HeadCenter -> 0.5, HeadLength -> 0.035, HeadWidth -> 0.75}],
  Graphics[{RGBColor[0, 0, 0], Text["CLB2", {1.1, -0.34}]}],
  Graphics[{RGBColor[0, 0, 0], Arrow[{-1.1, 0.37}, externalcoordinates[[3]],
  HeadCenter -> 0.5, HeadLength -> 0.035, HeadWidth -> 0.75}],
  Graphics[{RGBColor[0, 0, 0], Arrow[{-1.1, 0.37}, externalcoordinates[[4]],
  HeadCenter -> 0.5, HeadLength -> 0.035, HeadWidth -> 0.75}],
  Graphics[{RGBColor[0, 0, 0], Text["CLN3", {-1.1, 0.44}]}],
  Graphics[{RGBColor[0, 0, 0], Dashing[{0.03, 0.02}], Circle[{0, 0}, 0.5, {0.*Pi, 2*Pi}]}],
  Graphics[{RGBColor[0, 0, 0], Dashing[{0.03, 0.02}], Circle[{0, 0}, 1]}],
  Graphics[{RGBColor[0, 0, 0], Arrow[{-1.25, 0}, {1.25, 0}],
  HeadCenter -> 0.5, HeadLength -> 0.035, HeadWidth -> 0.75}],
  Graphics[{RGBColor[0, 0, 0], Arrow[{0, -1.25}, {0, 1.25}],
  HeadCenter -> 0.5, HeadLength -> 0.035, HeadWidth -> 0.75}],
  Graphics[{RGBColor[0, 0, 0], Circle[{0, 0}, 0.7,
  {-Pi + ArcTan[coordinates[[1, 2]] / coordinates[[1, 1]]}],
  ArcTan[coordinates[[8, 2]] / coordinates[[8, 1]]]}],
  Graphics[{RGBColor[0, 0, 0], Arrow[
  {0.7 * Cos[-0.05 + ArcTan[coordinates[[8, 2]] / coordinates[[8, 1]]],
  0.7 * Sin[-0.05 + ArcTan[coordinates[[8, 2]] / coordinates[[8, 1]]]},
  {0.7 * Cos[ArcTan[coordinates[[8, 2]] / coordinates[[8, 1]]],
  0.7 * Sin[ArcTan[coordinates[[8, 2]] / coordinates[[8, 1]]]},
  HeadCenter -> 0.5, HeadLength -> 0.035, HeadWidth -> 0.75}],
  AspectRatio -> 1,
  PlotRange -> {{-1.25, 1.25}, {-1.25, 1.25}},
  Frame -> True,
  FrameTicks -> False,
  FrameLabel -> {None, None, None, None},
  GridLines -> {{{0, RGBColor[0, 0, 0]}}, {{0, RGBColor[0, 0, 0]}},
  DisplayFunction -> Identity];
p = FullGraphics[p];
p[[1, 2]] = p[[1, 2]] /.
  Text[labely, {b_, c_}, {1., 0.}] ->
  Text[labely, {-1.18, 0}, {0, 0}, {0, 1}];
s1 = Show[p,
  AspectRatio -> 1.,
  PlotRange -> All,
  DisplayFunction -> Identity];

```

(\* Classify SVD Gene Phases into Cell Cycle Phases \*)

```
ph1 = 0;  
ph2 = -1 / 2.;  
ph3 = -1.;  
ph4 = -4 / 3.;  
ph5 = -5 / 3.;
```

```
endph5 = partialgenes;  
beginph1 = 1;  
partialphases[[endph5]] - ph1  
partialphases[[beginph1]] - ph1
```

```
{0.000221307}
```

```
{-0.000315169}
```

```
endph1 = 967;  
beginph2 = 968;  
partialphases[[endph1]] - ph2  
partialphases[[beginph2]] - ph2
```

```
{0.000187677}
```

```
{0.999788}
```

```
endph2 = 1827;  
beginph3 = 1828;  
partialphases[[endph2]] - ph3  
partialphases[[beginph3]] - ph3
```

```
{1.00101}
```

```
{0.999626}
```

```
endph3 = 2481;  
beginph4 = 2482;  
partialphases[[endph3]] - ph4  
partialphases[[beginph4]] - ph4
```

```
{1.00001}
```

```
{0.999872}
```

```
endph4 = 3556;  
beginph5 = 3557;  
partialphases[[endph4]] - ph5  
partialphases[[beginph5]] - ph5
```

```
{2.00032}
```

```
{1.99995}
```

(\* 4404 yeast genes, 967 in M/G1, 920 in G1, 654 in S, 1075 in S/G2, 848 in G2/M. \*)

```

(* Display SVD Reconstructed and Sorted External Data *)

(* SVD Reconstruct Sorted External Data *)

matrix = partialexternalmatrix;

(* Create SVD Reconstructed Sorted External Data 2 D Red & Green Raster Display *)

contrast = 10 * 1.5;
displaying = Table[
  If[contrast * matrix[[i, j]] > 0,
    If[contrast * matrix[[i, j]] < 1, {contrast * matrix[[i, j]], 0}, {1, 0}],
    If[contrast * matrix[[i, j]] > -1, {0, -contrast * matrix[[i, j]]}, {0, 1}]],
  {i, 1, partialgenes}, {j, 1, externalarrays}];
framex = Table[{a - 0.5, externalarraynames[[2, a]]}, {a, 1, externalarrays}];
framey = {
  {partialgenes - endph1 / 2, "M/G1"},
  {partialgenes - (endph1 + endph2) / 2, "G1"},
  {partialgenes - (endph2 + endph3) / 2, "S"},
  {partialgenes - (endph3 + endph4) / 2, "S/G2"},
  {(partialgenes - endph4) / 2, "G2/M"}];
gridy = {
  {partialgenes - endph1 + 0.5, {RGBColor[0, 0, 0]}},
  {partialgenes - endph2 + 0.5, {RGBColor[0, 0, 0]}},
  {partialgenes - endph3 + 0.5, {RGBColor[0, 0, 0]}},
  {partialgenes - endph4 + 0.5, {RGBColor[0, 0, 0]}}];
labelx = "(a) Arrays";
labely = ColumnForm[{" ", "Genes", " ", " ", " ", " ", " ", " ", " ", " "}, Center];
g = Show[
  Graphics[
    RasterArray[
      Table[
        RGBColor[displaying[[i, j, 1]], displaying[[i, j, 2]], 0],
        {i, partialgenes, 1, -1}, {j, 1, externalarrays}]]],
  AspectRatio -> 1,
  Frame -> True,
  FrameTicks -> {None, framey, framex, None},
  FrameLabel -> {None, labely, labelx, None},
  GridLines -> {None, gridy},
  DisplayFunction -> Identity];

```

```

g = FullGraphics[g];
g[[1, 2]] = g[[1, 2]] /.
  Text[labely, {b_, c_}, {1., 0.}] ->
  Text[labely, {b, c}, {0, 0}, {0, 1}];
g[[1, 2]] = g[[1, 2]] /.
  Text[a_, {b_, c_}, {1., 0.}] ->
  Text[a, {b - 0.4, c}, {0, 0}, {0, 1}];
g[[1, 2]] = g[[1, 2]] /.
  Text[labelx, {b_, c_}, {0., -1.}] ->
  Text[labelx, {b, c + 2200}, {0, -1}, {1, 0}];
g[[1, 2]] = g[[1, 2]] /.
  Text[a_, {b_, c_}, {0., -1.}] ->
  Text[a, {b, c + 1100}, {0, 0}, {0, 1}];
g1 = Show[g,
  AspectRatio -> GoldenRatio * 1.2,
  PlotRange -> All,
  DisplayFunction -> Identity];

```

(\* Create Reconstructed Sorted External Data Graph Display \*)

```

matrix = Transpose[matrix];
matrixplot = Table[0, {a, 1, externalarrays}];
Do[
  matrixplot[[a]] = Chop[TrigFit[matrix[[a]], 1, {x, partialgenes - 1}], 0.05],
  {a, 1, externalarrays}]
table = Table[
  {externalarraynames[[2, a]], matrixplot[[a]]}, {a, 1, externalarrays}];
TableForm[table]

b2_40min      0.218194 Cos[ $\frac{2\pi x}{4403}$ ] - 0.0879994 Sin[ $\frac{2\pi x}{4403}$ ]
b2_40min      0.224201 Cos[ $\frac{2\pi x}{4403}$ ] - 0.0760136 Sin[ $\frac{2\pi x}{4403}$ ]
n3_40min      -0.0810224 - 0.315992 Cos[ $\frac{2\pi x}{4403}$ ] + 0.106885 Sin[ $\frac{2\pi x}{4403}$ ]
n3_30min      -0.126403 Cos[ $\frac{2\pi x}{4403}$ ] + 0.0571277 Sin[ $\frac{2\pi x}{4403}$ ]

p = Table[0, {a, 1, externalarrays}];
color = {
  RGBColor[0.75, 0, 1],
  RGBColor[1, 0, 0],
  RGBColor[1, 0.5, 0],
  RGBColor[0, 0.5, 0],
  RGBColor[0, 0, 1]};
labelx = "(b) Expression Level";
framex = Table[{1.4 * a, externalarraynames[[2, a]]},
  {a, 1, externalarrays}];

```

```

Do[{
  graph = ParametricPlot[{matrixplot[[n]] + 1.4 * n, -x},
    {x, 0, partialgenes - 1},
    PlotStyle -> {RGBColor[0, 0, 0]},
    DisplayFunction -> Identity],
  coordinates = Table[
    If[matrix[[n, a]] + 1.4 * n < 0, 0,
      If[matrix[[n, a]] + 1.4 * n > 7, 7,
        matrix[[n, a]] + 1.4 * n]],
    {a, 1, partialgenes}],
  coordinates = Table[{coordinates[[a]], -a + 1}, {a, 1, partialgenes}],
  line = Line[coordinates],
  g = Show[{
    Graphics[{color[[Mod[n, 5] + 1]], line}],
    graph},
  Frame -> True,
  FrameLabel -> {None, None, labelx, None},
  FrameTicks -> {None, None, framex, None},
  GridLines -> {{1.4 * n, RGBColor[0, 0, 0]}, None},
  PlotRange -> {{0, 7}, {95, -partialgenes + 1 - 95}},
  DisplayFunction -> Identity],
g = FullGraphics[g],
g[[1, 2]] = g[[1, 2]] /.
  Text[labely, {b_, c_}, {1., 0.}] ->
  Text[labely, {b, c}, {0, 0}, {0, 1}],
g[[1, 2]] = g[[1, 2]] /.
  Text[labelx, {b_, c_}, {0., -1.}] ->
  Text[labelx, {b, c + 2200}, {0, -1}, {1, 0}],
g[[1, 2]] = g[[1, 2]] /.
  Text[a_, {b_, c_}, {0., -1.}] ->
  Text[a, {b, c + 1100}, {0, 0}, {0, 1}],
p[[n]] = Show[g,
  AspectRatio -> GoldenRatio * 1.2 / 1.5,
  PlotRange -> All,
  DisplayFunction -> Identity]
}, {n, 1, externalarrays}];

g2 = Show[Table[p[[a]], {a, 1, externalarrays}],
  DisplayFunction -> Identity];

```

(\* Display Correlations of External Arrays with SVD and GSVD Bases \*)

```

Show[GraphicsArray[{q3, q4}],
  GraphicsSpacing -> -0.125];

```

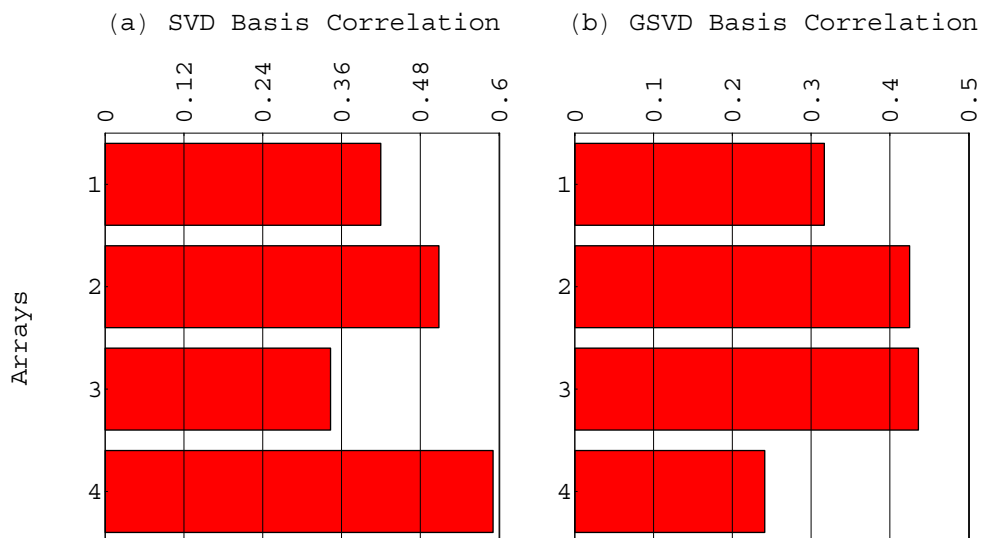

(\* Display SVD and GSVD Sorted External Data \*)

```

q1 = Show[{
  Graphics[{Rectangle[{0, 0}, {82, 75}, g1]}],
  Graphics[{Rectangle[{70, 0}, {155, 75}, g2]}]},
  PlotRange -> All,
  DisplayFunction -> Identity];
q2 = Show[{
  Graphics[{Rectangle[{0, 0}, {82, 75}, g3]}],
  Graphics[{Rectangle[{70, 0}, {155, 75}, g4]}]},
  PlotRange -> All,
  DisplayFunction -> Identity];
Show[GraphicsArray[{{q1}, {q2}}],
  GraphicsSpacing -> -0.02];

```

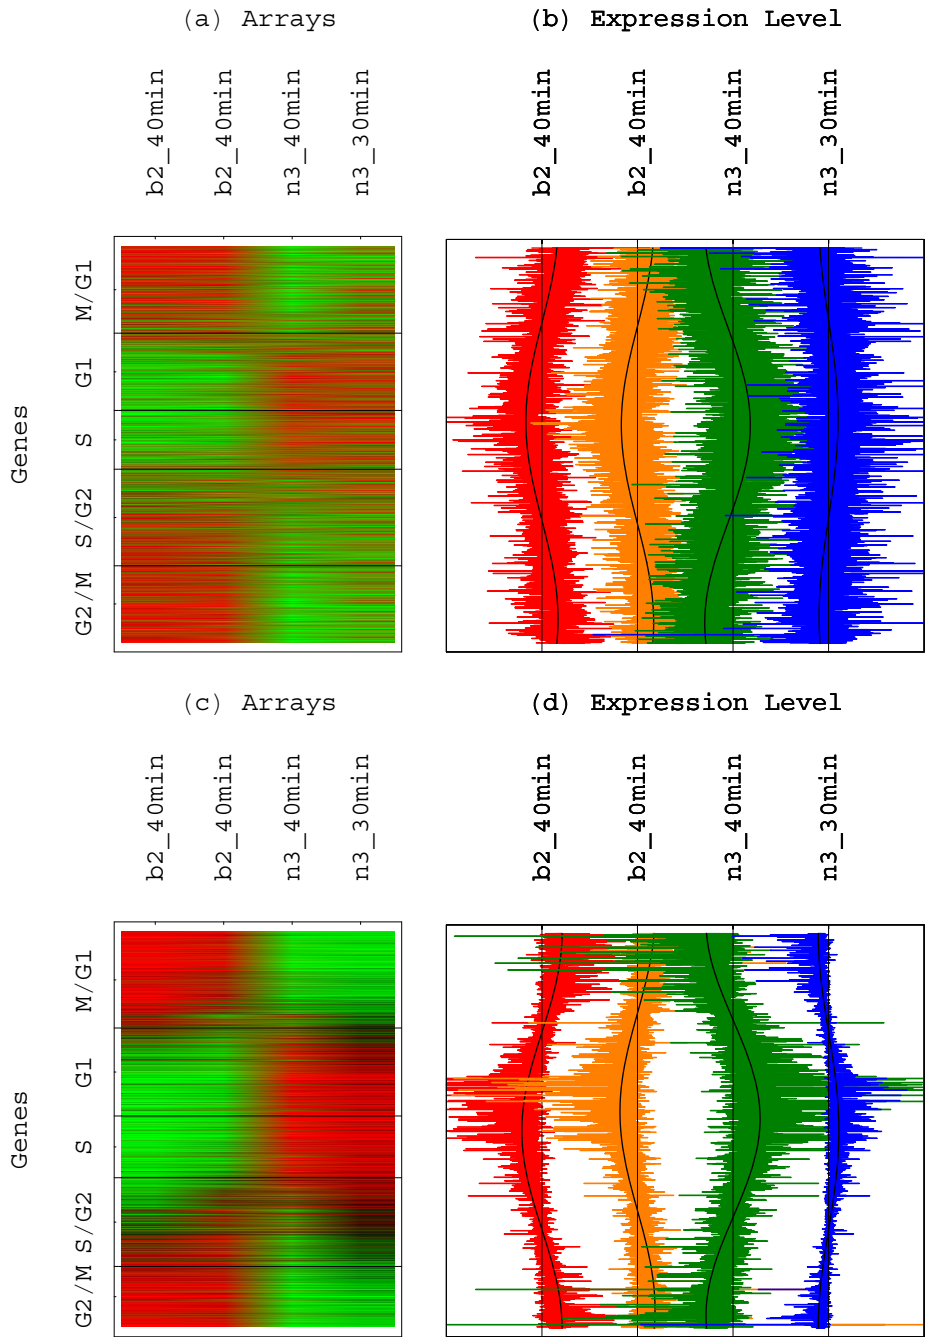

(\* Display Mapping of Alpha Factor Time Course and Regulators Overexpression Data \*)

```
Show[GraphicsArray[{s1, s2}],
GraphicsSpacing -> 0];
```

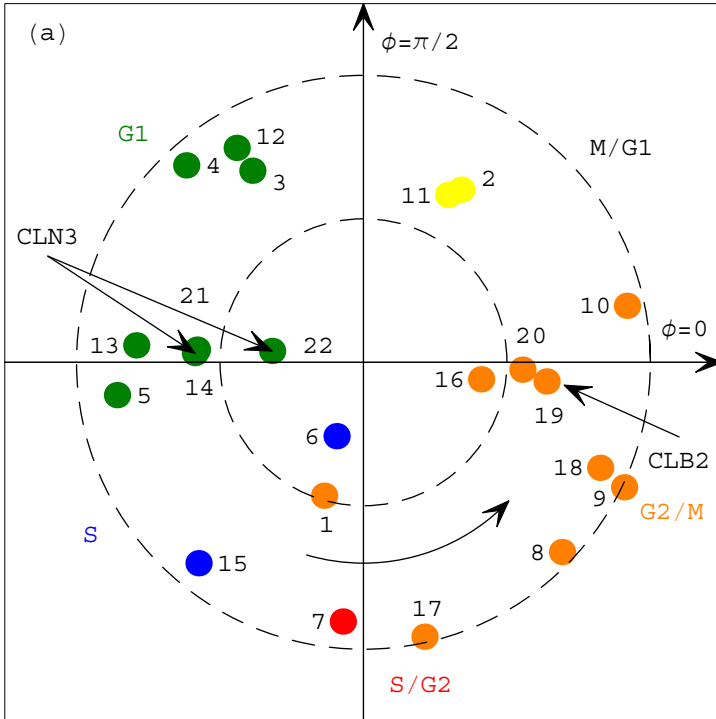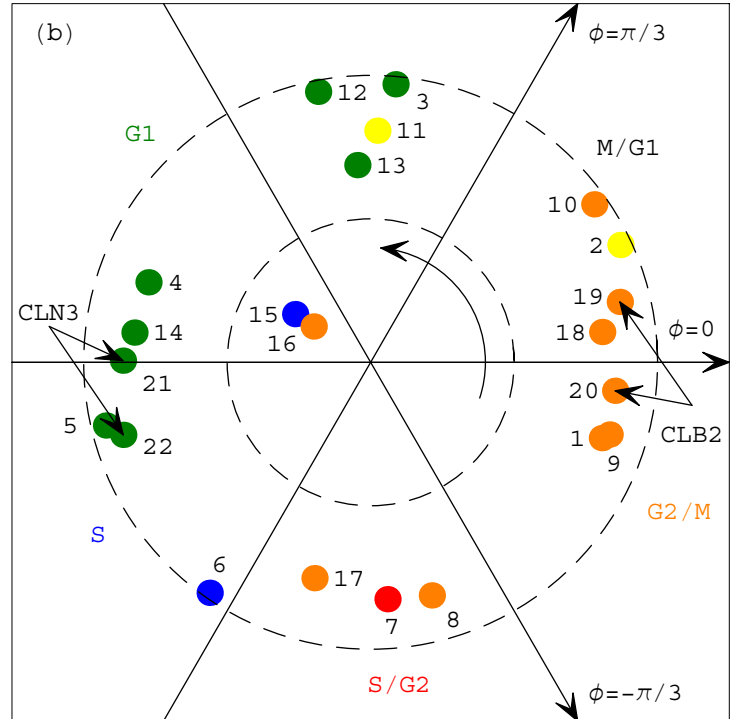



(\* Map Yeast Cdc15 Cell Cycle Time Course Expression Data \*)

(\* Read Data \*)

```
stream = "Desktop/Networks/Data/Cdc15.txt.nb";
externalmatrix = ReadList[stream, Word, RecordLists -> True, NullWords -> True];
{externalgenes, externalarrays} = Dimensions[externalmatrix] - {2, 3}
Clear[stream];

{4122, 24}

externalgenenames = TakeRows[
  TakeColumns[externalmatrix, {1, 3}],
  {3, externalgenes + 2}];
externalarraynames = TakeColumns[
  TakeRows[externalmatrix, {1, 2}],
  {4, externalarrays + 3}];
externalmatrix = TakeColumns[
  TakeRows[externalmatrix, {3, externalgenes + 2}],
  {4, externalarrays + 3}];
externalmatrix = ToExpression[externalmatrix];

sizes = Flatten[
  Table[
    Dimensions[
      Characters[
        ToString[externalarraynames[[2, a]]
        ]]],
    {a, 1, externalarrays}]];
size = Sort[sizes, OrderedQ[{{#2, #1}}] &][[1]];
Do[
  Do[externalarraynames[[2, a]] = StringJoin[ToString[externalarraynames[[2, a]]], " "],
  {b, 1, size - sizes[[a]]}],
  {a, 1, externalarrays}];
```

(\* Display Sorted External Arrays \*)

```
arraypatterns = Transpose[externalmatrix];
```

(\* Center External Arrays \*)

```
average = Table[1, {a, 1, externalgenes}];
average = N[average / Sqrt[Dot[average, average]]];
arraypatterns = arraypatterns - N[Outer[Times, Dot[arraypatterns, average], average]];
```

(\* Normalize External Arrays \*)

```
Do[
  arraypatterns[[a]] =
  arraypatterns[[a]] / Sqrt[Dot[arraypatterns[[a]], arraypatterns[[a]]],
  {a, 1, externalarrays}]
```

(\* Sort External Arrays \*)

```
Do[
  arraypatterns[[a]] = Sort[arraypatterns[[a]], OrderedQ[{{#2}, {#1}}] &],
  {a, 1, externalarrays}]
```

(\* Create Sorted External Arrays Graph Display \*)

```

p = Table[0, {a, 1, externalarrays}];
color = {
  RGBColor[0.75, 0, 1],
  RGBColor[1, 0, 0],
  RGBColor[1, 0.5, 0],
  RGBColor[0, 0.5, 0],
  RGBColor[0, 0, 1]};
labelx = "Expression Level";
labely = ColumnForm[
  {" ", "Number of Genes", " ", " ", " ", " ", " ", " ", " ", " ", " ", " "},
  Center];
framex = Table[{0.02 * a, externalarraynames[[2, a]]},
  {a, 1, externalarrays}];
framey = {{-200, "200"}, {-2000, "2000"}, {-externalgenes + 200, "3922"}};

Do[{
  coordinates = Table[
    If[arraypatterns[[n, a]] + 0.02 * n < -0.02, -0.02,
    If[arraypatterns[[n, a]] + 0.02 * n > 0.52, 0.52,
    arraypatterns[[n, a]] + 0.02 * n],
    {a, 1, externalgenes}],
  coordinates = Table[{coordinates[[a]], -a + 1}, {a, 1, externalgenes}],
  line = Line[coordinates],
  g = Show[
    Graphics[{color[[Mod[n, 5] + 1]], line}],
    Frame -> True,
    FrameLabel -> {None, labely, labelx, None},
    FrameTicks -> {None, framey, framex, None},
    GridLines -> {{{{0.02 * n, RGBColor[0, 0, 0]}}, {{-200, RGBColor[0, 0, 0]},
    {-2000, RGBColor[0, 0, 0]}, {-externalgenes + 200, RGBColor[0, 0, 0]}}},
    PlotRange -> {{0, 0.52}, {135, -externalgenes + 1 - 135}},
    DisplayFunction -> Identity],
  g = FullGraphics[g],
  g[[1, 2]] = g[[1, 2]] /.
    Text[labely, {b_, c_}, {1., 0.}] ->
    Text[labely, {b, c}, {0, 0}, {0, 1}],
  g[[1, 2]] = g[[1, 2]] /.
    Text[labelx, {b_, c_}, {0., -1.}] ->
    Text[labelx, {b, c + 1600}, {0, -1}, {1, 0}],
  g[[1, 2]] = g[[1, 2]] /.
    Text[a_, {b_, c_}, {0., -1.}] ->
    Text[a, {b, c + 700}, {0, 0}, {0, 1}],
  p[[n]] = Show[g,
    AspectRatio -> 1 / 1.2 / GoldenRatio,
    PlotRange -> All,
    DisplayFunction -> Identity]
}, {n, 1, externalarrays}];

```

(\* Display Sorted External Arrays \*)

```
Show[Table[p[[a]], {a, 1, externalarrays}],  
  DisplayFunction -> $DisplayFunction];
```

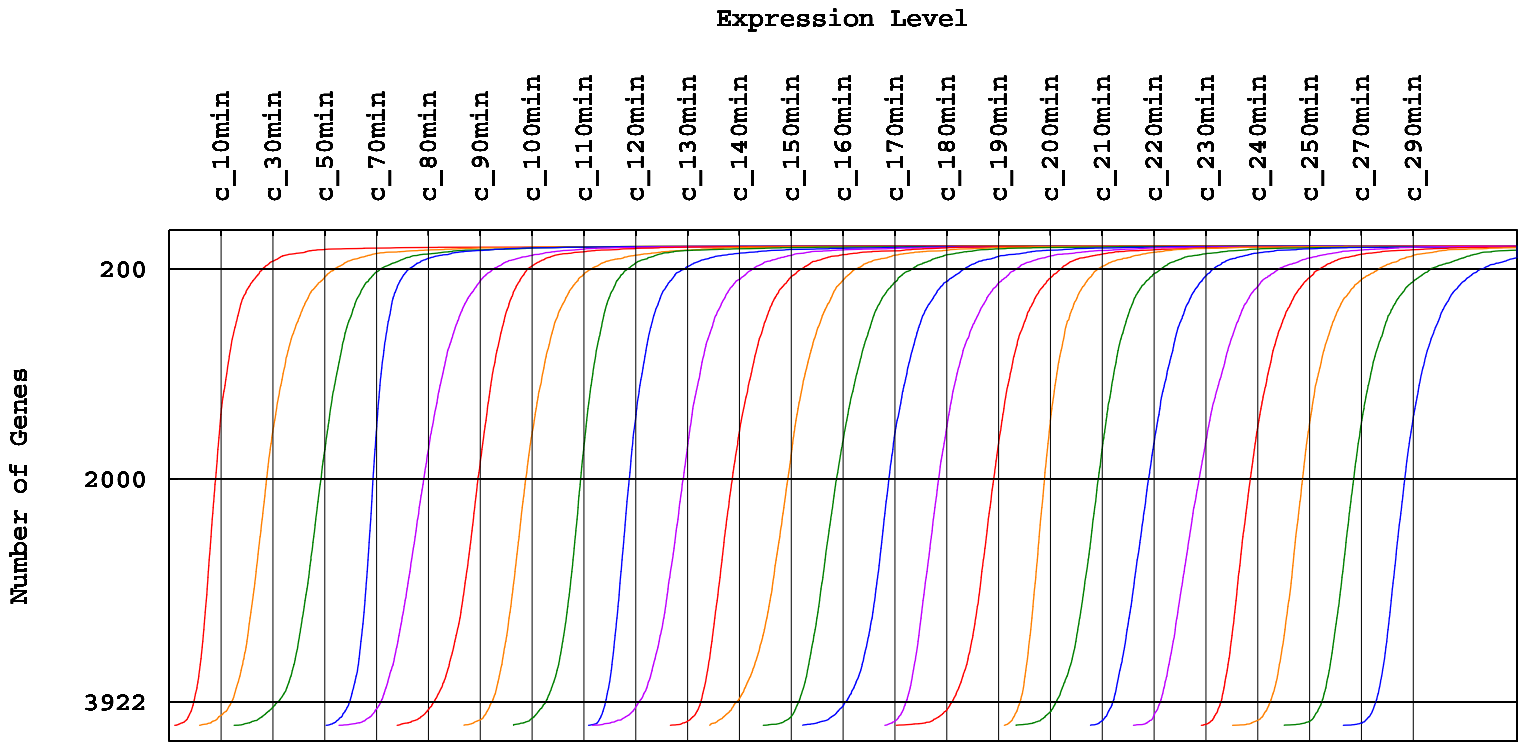

(\* Estimate Significance of Association of External Data with the Cell Cycle \*)

(\* Use Microarray Classification of Yeast Genes \*)

```
most = 200;
genenames = TakeColumns[externalgenenames, {2}];
stages = {"M/G1", "G1", "S", "S/G2", "G2/M", "None"};
numbers = Flatten[Table[{Count[Flatten[genenames], stages[[a]]], {a, 1, Dimensions[stages][[1]]}]];
genelet = Table[{a}, {a, 1, externalarrays}];
probability = Table[{0}, {a, 1, Dimensions[genelet][[1]]}];
parallelannotation = Table[{0}, {a, 1, Dimensions[genelet][[1]]}];
parallelprobability = Table[{0}, {a, 1, Dimensions[genelet][[1]]}];
antiannotation = Table[{0}, {a, 1, Dimensions[genelet][[1]]}];
antiprobability = Table[{0}, {a, 1, Dimensions[genelet][[1]]}];

Do[{
  arraylet = TakeColumns[Sort[
    AppendRows[TakeColumns[externalmatrix, genelet[[c]], genenames],
    OrderedQ[{{#2}, {#1}}] &], {2}],
  table = Table[{
    stages[[a]],
    numbers[[a]],
    Count[Flatten[TakeRows[arraylet, {1, most}]], stages[[a]]],
    {a, 1, Dimensions[stages][[1]]}],
  probability = Table[{
    Sum[N[Binomial[table[[a, 2]], b] * Binomial[externalgenes - table[[a, 2]], most - b] /
      Binomial[externalgenes, most]], {b, table[[a, 3]], most}],
    stages[[a]],
    {a, 1, Dimensions[stages][[1]]}],
  parallelannotation[[c]] = {Sort[probability, OrderedQ[{{#1}, {#2}}] &][[1, 2]]},
  parallelprobability[[c]] = {ScientificForm[Sort[probability, OrderedQ[{{#1}, {#2}}] &][[1, 1], 2]}],
  table = Table[{
    stages[[a]],
    numbers[[a]],
    Count[Flatten[TakeRows[arraylet, {externalgenes - most + 1, externalgenes}]], stages[[a]]],
    {a, 1, Dimensions[stages][[1]]}],
  probability = Table[{
    Sum[N[Binomial[table[[a, 2]], b] * Binomial[externalgenes - table[[a, 2]], most - b] /
      Binomial[externalgenes, most]], {b, table[[a, 3]], most}],
    stages[[a]],
    {a, 1, Dimensions[stages][[1]]}],
  antiannotation[[c]] = {Sort[probability, OrderedQ[{{#1}, {#2}}] &][[1, 2]]},
  antiprobability[[c]] = {ScientificForm[Sort[probability, OrderedQ[{{#1}, {#2}}] &][[1, 1], 2]}],
  {c, 1, Dimensions[genelet][[1]]}

table1 = AppendRows [
  Table[{externalarraynames[[2, a]], {a, 1, externalarrays}],
  parallelannotation,
  parallelprobability,
  antiannotation,
  antiprobability];
```

(\* Use Traditional Classification of Yeast Genes \*)

```
most = 200;
genenames = TakeColumns[externalgenenames, {3}];
stages = {"M/G1", "G1", "S", "S/G2", "G2/M", "None"};
numbers = Flatten[Table[{Count[Flatten[genenames], stages[[a]]]}, {a, 1, Dimensions[stages][[1]]}]];
genelet = Table[{a}, {a, 1, externalarrays}];
probability = Table[{0}, {a, 1, Dimensions[genelet][[1]]}];
parallelannotation = Table[{0}, {a, 1, Dimensions[genelet][[1]]}];
parallelprobability = Table[{0}, {a, 1, Dimensions[genelet][[1]]}];
antiannotation = Table[{0}, {a, 1, Dimensions[genelet][[1]]}];
antiprobability = Table[{0}, {a, 1, Dimensions[genelet][[1]]}];

Do[{
  arraylet = TakeColumns[Sort[
    AppendRows[TakeColumns[externalmatrix, genelet[[c]], genenames],
    OrderedQ[{{#2}, {#1}}] &], {2}],
  table = Table[{
    stages[[a]],
    numbers[[a]],
    Count[Flatten[TakeRows[arraylet, {1, most}]], stages[[a]]],
    {a, 1, Dimensions[stages][[1]]}],
  probability = Table[{
    Sum[N[Binomial[table[[a, 2]], b] * Binomial[externalgenes - table[[a, 2]], most - b] /
      Binomial[externalgenes, most]], {b, table[[a, 3]], most}],
    stages[[a]],
    {a, 1, Dimensions[stages][[1]]}],
  parallelannotation[[c]] = {Sort[probability, OrderedQ[{{#1}, {#2}}] &][[1, 2]]},
  parallelprobability[[c]] = {ScientificForm[Sort[probability, OrderedQ[{{#1}, {#2}}] &][[1, 1]], 2]},
  table = Table[{
    stages[[a]],
    numbers[[a]],
    Count[Flatten[TakeRows[arraylet, {externalgenes - most + 1, externalgenes}]], stages[[a]]],
    {a, 1, Dimensions[stages][[1]]}],
  probability = Table[{
    Sum[N[Binomial[table[[a, 2]], b] * Binomial[externalgenes - table[[a, 2]], most - b] /
      Binomial[externalgenes, most]], {b, table[[a, 3]], most}],
    stages[[a]],
    {a, 1, Dimensions[stages][[1]]}],
  antiannotation[[c]] = {Sort[probability, OrderedQ[{{#1}, {#2}}] &][[1, 2]]},
  antiprobability[[c]] = {ScientificForm[Sort[probability, OrderedQ[{{#1}, {#2}}] &][[1, 1]], 2]},
  {c, 1, Dimensions[genelet][[1]]}

table2 = AppendRows[
  Table[{externalarraynames[[2, a]], {a, 1, externalarrays}},
  parallelannotation,
  parallelprobability,
  antiannotation,
  antiprobability];
```

(\* Display Significance of Association of External Arrays with the Cell Cycle \*)

```
headerx = {{
  ColumnForm[{" ", " ", " "}, Left],
  ColumnForm[{" ", " ", "Classification"}, Left],
  ColumnForm[{" ", "External", "Array"}, Left],
  ColumnForm[{"Most Likely", "Parallel", "Association"}, Left],
  ColumnForm[{"P-Value of", "Parallel", "Association"}, Left],
  ColumnForm[{"Most Likely", "Antiparallel", "Association"}, Left],
  ColumnForm[{"P-Value of", "Antiparallel", "Association"}, Left]},
{" ", " ", " ", " ", " ", " ", " ", " ", " "}};
spacerx = {" ", " ", " ", " ", " "};
headery = Table[" ", {a, 1, 2*externalarrays + 1}, {b, 1, 2}];
headery[[1]] = {"(a)", "Microarray"};
headery[[externalarrays + 2]] = {"(b)", "Traditional"};
association =
  AppendColumns[headerx,
  AppendRows[headery,
  AppendColumns[table1, spacerx, table2]]];
TableForm[association, TableSpacing -> {1, 1}]
```

| Classification  | External Array | Most Likely Parallel Association | P-Value of Parallel Association | Most Likely Antiparallel Association | P-Value of Antiparallel Association |
|-----------------|----------------|----------------------------------|---------------------------------|--------------------------------------|-------------------------------------|
| (a) Microarray  | c_10min        | M/G1                             | $1.1 \times 10^{-3}$            | G2/M                                 | $5.2 \times 10^{-8}$                |
|                 | c_30min        | G1                               | $1.4 \times 10^{-12}$           | G2/M                                 | $4.1 \times 10^{-21}$               |
|                 | c_50min        | G1                               | $2.3 \times 10^{-29}$           | G2/M                                 | $1.5 \times 10^{-30}$               |
|                 | c_70min        | S                                | $2.5 \times 10^{-8}$            | M/G1                                 | $2.8 \times 10^{-19}$               |
|                 | c_80min        | S/G2                             | $2.2 \times 10^{-9}$            | M/G1                                 | $9.6 \times 10^{-15}$               |
|                 | c_90min        | G2/M                             | $3.8 \times 10^{-20}$           | G1                                   | $3. \times 10^{-20}$                |
|                 | c_100min       | G2/M                             | $3.8 \times 10^{-20}$           | G1                                   | $2.3 \times 10^{-29}$               |
|                 | c_110min       | G2/M                             | $2. \times 10^{-29}$            | G1                                   | $1.9 \times 10^{-27}$               |
|                 | c_120min       | G2/M                             | $9.3 \times 10^{-15}$           | G1                                   | $6.8 \times 10^{-12}$               |
|                 | c_130min       | M/G1                             | $4.2 \times 10^{-18}$           | S                                    | $4.5 \times 10^{-3}$                |
|                 | c_140min       | G1                               | $3. \times 10^{-20}$            | S/G2                                 | $8.6 \times 10^{-8}$                |
|                 | c_150min       | G1                               | $1.3 \times 10^{-18}$           | G2/M                                 | $4.7 \times 10^{-5}$                |
|                 | c_160min       | G1                               | $6.8 \times 10^{-12}$           | G2/M                                 | $4.7 \times 10^{-5}$                |
|                 | c_170min       | G1                               | $1.2 \times 10^{-4}$            | M/G1                                 | $2.7 \times 10^{-4}$                |
|                 | c_180min       | S                                | $1.1 \times 10^{-3}$            | M/G1                                 | $5.9 \times 10^{-5}$                |
|                 | c_190min       | G2/M                             | $4.7 \times 10^{-4}$            | G1                                   | $1. \times 10^{-14}$                |
|                 | c_200min       | G2/M                             | $4.6 \times 10^{-10}$           | G1                                   | $1.5 \times 10^{-5}$                |
|                 | c_210min       | G2/M                             | $1.5 \times 10^{-11}$           | G1                                   | $3. \times 10^{-20}$                |
|                 | c_220min       | G2/M                             | $2.3 \times 10^{-17}$           | G1                                   | $1.5 \times 10^{-5}$                |
|                 | c_230min       | G2/M                             | $1.4 \times 10^{-5}$            | G1                                   | $5. \times 10^{-6}$                 |
|                 | c_240min       | G2/M                             | $1.1 \times 10^{-8}$            | S                                    | $4.9 \times 10^{-2}$                |
|                 | c_250min       | M/G1                             | $1.2 \times 10^{-11}$           | S/G2                                 | $1.2 \times 10^{-1}$                |
|                 | c_270min       | M/G1                             | $1.2 \times 10^{-5}$            | G2/M                                 | $3.5 \times 10^{-3}$                |
|                 | c_290min       | M/G1                             | $5.9 \times 10^{-5}$            | G2/M                                 | $4.7 \times 10^{-4}$                |
| (b) Traditional | c_10min        | G2/M                             | $1.4 \times 10^{-2}$            | S                                    | $2.1 \times 10^{-2}$                |
|                 | c_30min        | G1                               | $2.9 \times 10^{-5}$            | G2/M                                 | $1.4 \times 10^{-3}$                |
|                 | c_50min        | G1                               | $4.9 \times 10^{-14}$           | G2/M                                 | $1.6 \times 10^{-7}$                |
|                 | c_70min        | S                                | $2.6 \times 10^{-5}$            | M/G1                                 | $1.6 \times 10^{-5}$                |
|                 | c_80min        | S                                | $1. \times 10^{-3}$             | M/G1                                 | $7.6 \times 10^{-7}$                |
|                 | c_90min        | G2/M                             | $9.3 \times 10^{-5}$            | G1                                   | $3.2 \times 10^{-9}$                |
|                 | c_100min       | G2/M                             | $9.3 \times 10^{-5}$            | G1                                   | $3.2 \times 10^{-9}$                |
|                 | c_110min       | G2/M                             | $3.9 \times 10^{-9}$            | G1                                   | $2.4 \times 10^{-10}$               |
|                 | c_120min       | G2/M                             | $1.4 \times 10^{-3}$            | S                                    | $2.6 \times 10^{-5}$                |
|                 | c_130min       | M/G1                             | $7.6 \times 10^{-7}$            | S                                    | $1. \times 10^{-3}$                 |
|                 | c_140min       | G1                               | $3.7 \times 10^{-6}$            | G2/M                                 | $1.4 \times 10^{-3}$                |
|                 | c_150min       | G1                               | $3.8 \times 10^{-8}$            | G2/M                                 | $1.4 \times 10^{-2}$                |
|                 | c_160min       | G1                               | $4. \times 10^{-7}$             | G2/M                                 | $1.4 \times 10^{-3}$                |
|                 | c_170min       | S                                | $2.6 \times 10^{-5}$            | G2/M                                 | $1.4 \times 10^{-2}$                |
|                 | c_180min       | S                                | $1. \times 10^{-3}$             | None                                 | $3.5 \times 10^{-1}$                |
|                 | c_190min       | S                                | $1. \times 10^{-3}$             | M/G1                                 | $2.7 \times 10^{-3}$                |
|                 | c_200min       | G2/M                             | $1.4 \times 10^{-3}$            | M/G1                                 | $2.2 \times 10^{-2}$                |
|                 | c_210min       | G2/M                             | $1.4 \times 10^{-3}$            | G1                                   | $3.2 \times 10^{-9}$                |
|                 | c_220min       | G2/M                             | $1.4 \times 10^{-3}$            | G1                                   | $8.7 \times 10^{-2}$                |
|                 | c_230min       | G2/M                             | $9.3 \times 10^{-5}$            | G1                                   | $8.7 \times 10^{-2}$                |
|                 | c_240min       | M/G1                             | $2.4 \times 10^{-4}$            | S                                    | $2.2 \times 10^{-1}$                |
|                 | c_250min       | M/G1                             | $2.8 \times 10^{-8}$            | S/G2                                 | $1.3 \times 10^{-2}$                |
|                 | c_270min       | M/G1                             | $1.6 \times 10^{-5}$            | G2/M                                 | $1.4 \times 10^{-2}$                |
|                 | c_290min       | M/G1                             | $2.4 \times 10^{-4}$            | G2/M                                 | $1.4 \times 10^{-2}$                |

(\* GSVD Sort External Arrays \*)

```
genes = genes1;
genenames = TakeColumns[genenames1, 1];
arrays = arrays1;
arraynames = arraynames1;

externalgenenames = TakeColumns[externalgenenames, 1];
list = Flatten[Intersection[genenames, externalgenenames]];
{partialgenes} = Dimensions[list]

{3130}

counter = Table[{Position[genenames, list[[a]]][[1, 1]], list[[a]]}, {a, 1, partialgenes}];
counter = ReplaceAll[counter, {} -> {Null}];
counter = Sort[counter, OrderedQ[{{#1, #2}} &]];
list = Flatten[TakeColumns[counter, {2}]];

counter = Table[Flatten[Position[list, genenames[[a, 1]]]], {a, 1, genes}];
counter = ReplaceAll[counter, {} -> {Null}];
partialarraylets = AppendRows[counter, gsvdphases, genenames, arraylets1];
partialarraylets = Sort[partialarraylets, OrderedQ[{{#1, #2}} &]];
partialphases = TakeRows[
  TakeColumns[partialarraylets, {2, 2}],
  {1, partialgenes}];
partialgenenames = TakeRows[
  TakeColumns[partialarraylets, {3, 3}],
  {1, partialgenes}];
partialarraylets = TakeRows[
  TakeColumns[partialarraylets, {4, arrays + 3}],
  {1, partialgenes}];

counter = Table[Flatten[Position[list, externalgenenames[[a, 1]]]], {a, 1, externalgenes}];
counter = ReplaceAll[counter, {} -> {Null}];
partialexternalmatrix = AppendRows[counter, externalgenenames, externalmatrix];
partialexternalmatrix = Sort[partialexternalmatrix, OrderedQ[{{#1, #2}} &]];
partialexternalgenenames = TakeRows[
  TakeColumns[partialexternalmatrix, {2, 2}],
  {1, partialgenes}];
partialexternalmatrix = TakeRows[
  TakeColumns[partialexternalmatrix, {3, externalarrays + 2}],
  {1, partialgenes}];
```

(\* Project Data Onto GSVD Basis and Calculate Contributions of Arraylets to External Arrays \*)

```
partialarraylets = Transpose[partialarraylets];
average = Table[1, {a, 1, partialgenes}];
average = N[average / Sqrt[Dot[average, average]]];
partialarraylets =
  partialarraylets - N[Outer[Times, Dot[partialarraylets, average], average]];
partialarraylets = Transpose[partialarraylets];

arraycontributions = Dot[PseudoInverse[partialarraylets], partialexternalmatrix];
average = Table[1, {a, 1, externalarrays}];
average = N[average / Sqrt[Dot[average, average]]];
arraycontributions =
  arraycontributions - N[Outer[Times, Dot[arraycontributions, average], average]];
```



(\* Project Arrays from 6 D Arraylets Subspace Onto 2 D Subspace \*)

```
externalcoordinates = Table[{
  (-Sqrt[3] * (arraycontributions[[3, a]] - arraycontributions[[15, a]]) +
    2 * Sqrt[3] * (arraycontributions[[4, a]] - arraycontributions[[16, a]]) +
    (3 * arraycontributions[[5, a]] + Sqrt[3] * arraycontributions[[14, a]])) / 6 /
  Sqrt[(arraycontributions[[3, a]] - arraycontributions[[15, a]])^2 / 3 +
    (arraycontributions[[4, a]] - arraycontributions[[16, a]])^2 / 3 +
    (arraycontributions[[5, a]] + arraycontributions[[14, a]] / Sqrt[3])^2 +
    Abs[(arraycontributions[[3, a]] - arraycontributions[[15, a]]) / Sqrt[3] *
      (arraycontributions[[4, a]] - arraycontributions[[16, a]])] / Sqrt[3] +
    Abs[(arraycontributions[[3, a]] - arraycontributions[[15, a]]) / Sqrt[3] *
      (arraycontributions[[5, a]] + arraycontributions[[14, a]] / Sqrt[3])] +
    Abs[(arraycontributions[[4, a]] - arraycontributions[[16, a]]) / Sqrt[3] *
      (arraycontributions[[5, a]] + arraycontributions[[14, a]] / Sqrt[3])]],
  (3 * (arraycontributions[[3, a]] - arraycontributions[[15, a]]) +
    Sqrt[3] * (3 * arraycontributions[[5, a]] + Sqrt[3] * arraycontributions[[14, a]])) / 6 /
  Sqrt[(arraycontributions[[3, a]] - arraycontributions[[15, a]])^2 / 3 +
    (arraycontributions[[4, a]] - arraycontributions[[16, a]])^2 / 3 +
    (arraycontributions[[5, a]] + arraycontributions[[14, a]] / Sqrt[3])^2 +
    Abs[(arraycontributions[[3, a]] - arraycontributions[[15, a]]) / Sqrt[3] *
      (arraycontributions[[4, a]] - arraycontributions[[16, a]])] / Sqrt[3] +
    Abs[(arraycontributions[[3, a]] - arraycontributions[[15, a]]) / Sqrt[3] *
      (arraycontributions[[5, a]] + arraycontributions[[14, a]] / Sqrt[3])] +
    Abs[(arraycontributions[[4, a]] - arraycontributions[[16, a]]) / Sqrt[3] *
      (arraycontributions[[5, a]] + arraycontributions[[14, a]] / Sqrt[3])]],
  {a, 1, externalarrays}];
```

(\* Create Parameter Graph of Arrays Projected Onto 2 D Subspace \*)

```
points1 = {Point[externalcoordinates[[10]]], Point[externalcoordinates[[21]]],
  Point[externalcoordinates[[22]]], Point[externalcoordinates[[23]]],
  Point[externalcoordinates[[24]]]};
points2 = {Point[externalcoordinates[[2]]], Point[externalcoordinates[[3]]],
  Point[externalcoordinates[[11]]], Point[externalcoordinates[[12]]],
  Point[externalcoordinates[[13]]]};
points3 = {Point[externalcoordinates[[4]]], Point[externalcoordinates[[14]]],
  Point[externalcoordinates[[15]]], Point[externalcoordinates[[16]]]};
points4 = {Point[externalcoordinates[[5]]]};
points5 = {Point[externalcoordinates[[1]]], Point[externalcoordinates[[6]]],
  Point[externalcoordinates[[7]]], Point[externalcoordinates[[8]]],
  Point[externalcoordinates[[9]]], Point[externalcoordinates[[17]]],
  Point[externalcoordinates[[18]]], Point[externalcoordinates[[19]]],
  Point[externalcoordinates[[20]]]};
textcoordinates = externalcoordinates;
Do[
  textcoordinates[[a, 1]] = If[
    textcoordinates[[a, 1]] > 0,
    textcoordinates[[a, 1]] - 0.085,
    textcoordinates[[a, 1]] + 0.095],
  {a, 1, 9}];
Do[
  textcoordinates[[a, 1]] =
  If[textcoordinates[[a, 1]] > 0,
    textcoordinates[[a, 1]] - 0.11,
    textcoordinates[[a, 1]] + 0.12],
  {a, 10, externalarrays}];
textcoordinates[[1]] = textcoordinates[[1]] + {0.1, -0.12};
textcoordinates[[3]] = textcoordinates[[3]] + {0, 0.06};
textcoordinates[[4]] = textcoordinates[[4]] - {0.11, 0.12};
textcoordinates[[5]] = textcoordinates[[5]] + {-0.18, 0.085};
textcoordinates[[6]] = textcoordinates[[6]] + {0.17, 0.08};
textcoordinates[[7]] = textcoordinates[[7]] + {0.2, 0.08};
textcoordinates[[8]] = textcoordinates[[8]] + {0.23, 0};
textcoordinates[[9]] = textcoordinates[[9]] + {0.15, -0.15};
textcoordinates[[14]] = textcoordinates[[14]] + {0, -0.06};
textcoordinates[[15]] = textcoordinates[[15]] - {0.23, 0};
textcoordinates[[16]] = textcoordinates[[16]] + {0, 0.1};
textcoordinates[[17]] = textcoordinates[[17]] + {-0.1, 0.12};
textcoordinates[[18]] = textcoordinates[[18]] + {0.23, -0.06};
textcoordinates[[19]] = textcoordinates[[19]] + {0.23, 0.02};
textcoordinates[[22]] = textcoordinates[[22]] + {0.12, -0.12};
textcoordinates[[23]] = textcoordinates[[23]] + {0.24, 0.06};
```

```

texts = Table[Text[a, textcoordinates[[a]], {a, 1, externalarrays}];
p = Show[
  {Graphics[{RGBColor[1, 1, 0], PointSize[0.035], points1}],
  Graphics[{RGBColor[0, 0.5, 0], PointSize[0.035], points2}],
  Graphics[{RGBColor[0, 0, 1], PointSize[0.035], points3}],
  Graphics[{RGBColor[1, 0, 0], PointSize[0.035], points4}],
  Graphics[{RGBColor[1, 0.5, 0], PointSize[0.035], points5}],
  Graphics[{RGBColor[1, 0.5, 0], Text["G2/M", {1.075, -0.52}]}],
  Graphics[{RGBColor[0, 0, 0], Text["M/G1", {0.9, 0.75}]}],
  Graphics[{RGBColor[1, 0, 0], Text["S/G2", {0.1, -1.12}]}],
  Graphics[{RGBColor[0, 0, 1], Text["S", {-0.95, -0.6}]}],
  Graphics[{RGBColor[0, 0.5, 0], Text["G1", {-0.8, 0.8}]}],
  Graphics[{RGBColor[0, 0, 0], Text["(b)", {-1.1, 1.15}]}],
  Graphics[{RGBColor[0, 0, 0], Text[" $\phi = \pi/3$ ", {0.925, 1.15}]}],
  Graphics[{RGBColor[0, 0, 0], Text[" $\phi = 0$ ", {1.12, 0.12}]}],
  Graphics[{RGBColor[0, 0, 0], Text[" $\phi = -\pi/3$ ", {0.925, -1.15}]}],
  Graphics[texts],
  Graphics[{RGBColor[0, 0, 0], Dashing[{0.03, 0.02}], Circle[{0, 0}, 0.5]}],
  Graphics[{RGBColor[0, 0, 0], Dashing[{0.03, 0.02}], Circle[{0, 0}, 1]}],
  Graphics[{RGBColor[0, 0, 0], Arrow[{-1.25 / Tan[Pi / 3.], 1.25}, {1.25 / Tan[Pi / 3.], -1.25}],
    HeadCenter -> 0.5, HeadLength -> 0.035, HeadWidth -> 0.75}],
  Graphics[{RGBColor[0, 0, 0], Arrow[{-1.25, 0}, {1.25, 0}],
    HeadCenter -> 0.5, HeadLength -> 0.035, HeadWidth -> 0.75}],
  Graphics[{RGBColor[0, 0, 0], Arrow[{-1.25 / Tan[Pi / 3.], -1.25}, {1.25 / Tan[Pi / 3.], 1.25}],
    HeadCenter -> 0.5, HeadLength -> 0.035, HeadWidth -> 0.75}],
  Graphics[{RGBColor[0, 0, 0], Circle[{0, 0}, 0.6,
    {ArcTan[externalcoordinates[[1, 2]] / externalcoordinates[[1, 1]]],
    Pi + ArcTan[externalcoordinates[[2, 2]] / externalcoordinates[[2, 1]]}]}],
  Graphics[{RGBColor[0, 0, 0], Arrow[
    {0.6 * Cos[-0.05 + Pi + ArcTan[externalcoordinates[[2, 2]] / externalcoordinates[[2, 1]]],
    0.6 * Sin[-0.05 + Pi + ArcTan[externalcoordinates[[2, 2]] / externalcoordinates[[2, 1]]]},
    {0.6 * Cos[Pi + ArcTan[externalcoordinates[[2, 2]] / externalcoordinates[[2, 1]]],
    0.6 * Sin[Pi + ArcTan[externalcoordinates[[2, 2]] / externalcoordinates[[2, 1]]]},
    HeadCenter -> 0.5, HeadLength -> 0.035, HeadWidth -> 0.75}],
  AspectRatio -> 1,
  PlotRange -> {{-1.25, 1.25}, {-1.25, 1.25}},
  Frame -> True,
  FrameTicks -> False,
  FrameLabel -> {None, None, None, None},
  GridLines -> {None, {{0, RGBColor[0, 0, 0]}}},
  DisplayFunction -> Identity];
p = FullGraphics[p];
p[[1, 2]] = p[[1, 2]] /.
  Text[labely, {b_, c_}, {1., 0.}] ->
  Text[labely, {-1.18, 0}, {0, 0}, {0, 1}];
s2 = Show[p,
  AspectRatio -> 1.0,
  PlotRange -> All,
  DisplayFunction -> Identity];

```

(\* Classify GSVD Gene Phases into Cell Cycle Phases \*)

```
ph1 = 0;  
ph2 = -1 / 2.;  
ph3 = -1.;  
ph4 = -4 / 3.;  
ph5 = -5 / 3.;
```

```
endph5 = partialgenes;  
beginph1 = 1;  
partialphases[[endph5]] - ph1  
partialphases[[beginph1]] - ph1
```

```
{0.0000468343}
```

```
{-0.000239433}
```

```
endph1 = 774;  
beginph2 = 775;  
partialphases[[endph1]] - ph2  
partialphases[[beginph2]] - ph2
```

```
{0.00265793}
```

```
{0.999794}
```

```
endph2 = 1459;  
beginph3 = 1460;  
partialphases[[endph2]] - ph3  
partialphases[[beginph3]] - ph3
```

```
{1.0003}
```

```
{0.999906}
```

```
endph3 = 1934;  
beginph4 = 1935;  
partialphases[[endph3]] - ph4  
partialphases[[beginph4]] - ph4
```

```
{1.0009}
```

```
{0.99927}
```

```
endph4 = 2645;  
beginph5 = 2646;  
partialphases[[endph4]] - ph5  
partialphases[[beginph5]] - ph5
```

```
{2.00103}
```

```
{1.99935}
```

(\* 3130 yeast genes, 774 in M/G1, 685 in G1, 475 in S, 711 in S/G2, 485 in G2/M. \*)

```
(* Display GSVD Reconstructed Sorted External Data *)
```

```
(* GSVD Reconstruct Sorted External Data *)
```

```
subspace = Table[0, {a, 1, arrays}];  
Do[subspace[[a]] = 1, {a, 3, 5}];  
Do[subspace[[a]] = 1, {a, 14, 16}];  
matrix = Dot[partialarraylets, Dot[DiagonalMatrix[subspace], arraycontributions]];
```

```
(* Center GSVD Reconstructed Sorted External Data *)
```

```
average = Table[1, {a, 1, externalarrays}];  
average = N[average / Sqrt[Dot[average, average]]];  
matrix = matrix - N[Outer[Times, Dot[matrix, average], average]];  
matrix = Transpose[matrix];  
average = Table[1, {a, 1, partialgenes}];  
average = N[average / Sqrt[Dot[average, average]]];  
matrix = matrix - N[Outer[Times, Dot[matrix, average], average]];  
matrix = Transpose[matrix];
```

```
(* Create GSVD Reconstructed Sorted External Data 2D Red & Green Raster Display *)
```

```
contrast = 10 * 1.5;  
displaying = Table[  
  If[contrast * matrix[[i, j]] > 0,  
    If[contrast * matrix[[i, j]] < 1, {contrast * matrix[[i, j]], 0}, {1, 0}],  
    If[contrast * matrix[[i, j]] > -1, {0, -contrast * matrix[[i, j]]}, {0, 1}]],  
  {i, 1, partialgenes}, {j, 1, externalarrays}];  
framex = Table[{a - 0.5, externalarraynames[[2, a]]}, {a, 1, externalarrays}];  
framey = {  
  {partialgenes - endph1 / 2, "M/G1"},  
  {partialgenes - (endph1 + endph2) / 2, "G1"},  
  {partialgenes - (endph2 + endph3) / 2, "S"},  
  {partialgenes - (endph3 + endph4) / 2, "S/G2"},  
  {(partialgenes - endph4) / 2, "G2/M"}];  
gridy = {  
  {partialgenes - endph1 + 0.5, {RGBColor[0, 0, 0]}},  
  {partialgenes - endph2 + 0.5, {RGBColor[0, 0, 0]}},  
  {partialgenes - endph3 + 0.5, {RGBColor[0, 0, 0]}},  
  {partialgenes - endph4 + 0.5, {RGBColor[0, 0, 0]}}];  
labelx = "(c) Arrays";  
labely = ColumnForm[{" ", "Genes", " ", " ", " ", " ", " ", " ", " "}, Center];  
g = Show[  
  Graphics[  
    RasterArray[  
      Table[  
        RGBColor[displaying[[i, j, 1]], displaying[[i, j, 2]], 0],  
        {i, partialgenes, 1, -1}, {j, 1, externalarrays}]]],  
  AspectRatio -> 1,  
  Frame -> True,  
  FrameTicks -> {None, framey, framex, None},  
  FrameLabel -> {None, labely, labelx, None},  
  GridLines -> {None, gridy},  
  DisplayFunction -> Identity];
```

```

g = FullGraphics[g];
g[[1, 2]] = g[[1, 2]] /.
  Text[labely, {b_, c_}, {1., 0.}] →
  Text[labely, {b, c}, {0, 0}, {0, 1}];
g[[1, 2]] = g[[1, 2]] /.
  Text[a_, {b_, c_}, {1., 0.}] →
  Text[a, {b - 1.5, c}, {0, 0}, {0, 1}];
g[[1, 2]] = g[[1, 2]] /.
  Text[labelx, {b_, c_}, {0., -1.}] →
  Text[labelx, {b, c + 1400}, {0, -1}, {1, 0}];
g[[1, 2]] = g[[1, 2]] /.
  Text[a_, {b_, c_}, {0., -1.}] →
  Text[a, {b, c + 700}, {0, 0}, {0, 1}];
g3 = Show[g,
  AspectRatio -> GoldenRatio * 1.2,
  PlotRange -> All,
  DisplayFunction -> Identity];

```

(\* Create GSVD Reconstructed Sorted External Data Graph Display \*)

```

matrix = Transpose[matrix];
matrixplot = Table[0, {a, 1, externalarrays}];
Do[
  matrixplot[[a]] = Chop[TrigFit[matrix[[a]], 1, {x, partialgenes - 1}], 0.01],
  {a, 1, externalarrays}]
table = Table[
  {externalarraynames[[2, a]], matrixplot[[a]]}, {a, 1, externalarrays}];
TableForm[table]

```

```

c_10min      0.0492085 Cos[ $\frac{2 \pi x}{3129}$ ] - 0.0485293 Sin[ $\frac{2 \pi x}{3129}$ ]
c_30min      -0.0723436 Cos[ $\frac{2 \pi x}{3129}$ ] + 0.0667448 Sin[ $\frac{2 \pi x}{3129}$ ]
c_50min      -0.138921 Cos[ $\frac{2 \pi x}{3129}$ ] - 0.0208362 Sin[ $\frac{2 \pi x}{3129}$ ]
c_70min      -0.0308964 Cos[ $\frac{2 \pi x}{3129}$ ] - 0.0619406 Sin[ $\frac{2 \pi x}{3129}$ ]
c_80min      -0.0358439 Cos[ $\frac{2 \pi x}{3129}$ ] - 0.0609898 Sin[ $\frac{2 \pi x}{3129}$ ]
c_90min      0.0109438 Cos[ $\frac{2 \pi x}{3129}$ ] - 0.0866357 Sin[ $\frac{2 \pi x}{3129}$ ]
c_100min     0.0253978 Cos[ $\frac{2 \pi x}{3129}$ ] - 0.0546163 Sin[ $\frac{2 \pi x}{3129}$ ]
c_110min     0.0442143 Cos[ $\frac{2 \pi x}{3129}$ ] - 0.020275 Sin[ $\frac{2 \pi x}{3129}$ ]
c_120min     0.0683384 Cos[ $\frac{2 \pi x}{3129}$ ] + 0.0564395 Sin[ $\frac{2 \pi x}{3129}$ ]
c_130min     0.0527318 Sin[ $\frac{2 \pi x}{3129}$ ]
c_140min     -0.0400991 Cos[ $\frac{2 \pi x}{3129}$ ] + 0.109573 Sin[ $\frac{2 \pi x}{3129}$ ]
c_150min     -0.0566555 Cos[ $\frac{2 \pi x}{3129}$ ] + 0.0301401 Sin[ $\frac{2 \pi x}{3129}$ ]
c_160min     -0.108313 Cos[ $\frac{2 \pi x}{3129}$ ] + 0.0683256 Sin[ $\frac{2 \pi x}{3129}$ ]
c_170min     -0.0589913 Cos[ $\frac{2 \pi x}{3129}$ ]
c_180min     -0.0169827 Cos[ $\frac{2 \pi x}{3129}$ ]
c_190min     -0.0101811 Cos[ $\frac{2 \pi x}{3129}$ ] - 0.0750546 Sin[ $\frac{2 \pi x}{3129}$ ]
c_200min     -0.0400349 Sin[ $\frac{2 \pi x}{3129}$ ]
c_210min     0.0336404 Cos[ $\frac{2 \pi x}{3129}$ ] - 0.0569504 Sin[ $\frac{2 \pi x}{3129}$ ]
c_220min     0.0210032 Cos[ $\frac{2 \pi x}{3129}$ ]
c_230min     0.0551835 Cos[ $\frac{2 \pi x}{3129}$ ] + 0.0309614 Sin[ $\frac{2 \pi x}{3129}$ ]
c_240min     0.0344608 Cos[ $\frac{2 \pi x}{3129}$ ] + 0.0467684 Sin[ $\frac{2 \pi x}{3129}$ ]
c_250min     0.0501874 Cos[ $\frac{2 \pi x}{3129}$ ] + 0.0421348 Sin[ $\frac{2 \pi x}{3129}$ ]
c_270min     0.0406502 Cos[ $\frac{2 \pi x}{3129}$ ] + 0.0221476 Sin[ $\frac{2 \pi x}{3129}$ ]
c_290min     0.143793 Cos[ $\frac{2 \pi x}{3129}$ ] + 0.010278 Sin[ $\frac{2 \pi x}{3129}$ ]

```

```

p = Table[0, {a, 1, externalarrays}];
color = {
  RGBColor[0.75, 0, 1],
  RGBColor[1, 0, 0],
  RGBColor[1, 0.5, 0],
  RGBColor[0, 0.5, 0],
  RGBColor[0, 0, 1]};
labelx = "(d) Expression Level";
framex = Table[{0.5 * a, externalarraynames[[2, a]]},
  {a, 1, externalarrays}];

Do[{
  graph = ParametricPlot[{matrixplot[[n]] + 0.5 * n, -x},
    {x, 0, partialgenes - 1},
    PlotStyle -> {RGBColor[0, 0, 0]},
    DisplayFunction -> Identity],
  coordinates = Table[
    If[matrix[[n, a]] + 0.5 * n < 0, 0,
      If[matrix[[n, a]] + 0.5 * n > 12.5, 12.5,
        matrix[[n, a]] + 0.5 * n]],
    {a, 1, partialgenes}],
  coordinates = Table[{coordinates[[a]], -a + 1}, {a, 1, partialgenes}],
  line = Line[coordinates],
  g = Show[{
    Graphics[{color[[Mod[n, 5] + 1]], line}],
    graph},
  Frame -> True,
  FrameLabel -> {None, None, labelx, None},
  FrameTicks -> {None, None, framex, None},
  GridLines -> {{{0.5 * n, RGBColor[0, 0, 0]}}, None},
  PlotRange -> {{0, 12.5}, {95, -partialgenes + 1 - 95}},
  DisplayFunction -> Identity],
  g = FullGraphics[g],
  g[[1, 2]] = g[[1, 2]] /.
  Text[labely, {b_, c_}, {1., 0.}] ->
  Text[labely, {b, c}, {0, 0}, {0, 1}],
  g[[1, 2]] = g[[1, 2]] /.
  Text[labelx, {b_, c_}, {0., -1.}] ->
  Text[labelx, {b, c + 1400}, {0, -1}, {1, 0}],
  g[[1, 2]] = g[[1, 2]] /.
  Text[a_, {b_, c_}, {0., -1.}] ->
  Text[a, {b, c + 700}, {0, 0}, {0, 1}],
  p[[n]] = Show[g,
  AspectRatio -> GoldenRatio * 1.2 / 3,
  PlotRange -> All,
  DisplayFunction -> Identity]
}, {n, 1, externalarrays}];

g4 = Show[Table[p[[a]], {a, 1, externalarrays}],
  DisplayFunction -> Identity];

```

(\* Create GSVD Basis External Array Correlations Bar Chart Display \*)

```
partialarraylets = Transpose[partialarraylets];
partialarraylets = Drop[partialarraylets, {17, 18}];
partialarraylets = Drop[partialarraylets, {6, 13}];
partialarraylets = Drop[partialarraylets, {1, 2}];
partialarraylets = Transpose[partialarraylets];

average = Table[1, {a, 1, externalarrays}];
average = N[average / Sqrt[Dot[average, average]]];
partialexternalmatrix =
  partialexternalmatrix - N[Outer[Times, Dot[partialexternalmatrix, average], average]];
partialexternalmatrix = Transpose[partialexternalmatrix];
average = Table[1, {a, 1, partialgenes}];
average = N[average / Sqrt[Dot[average, average]]];
partialexternalmatrix =
  partialexternalmatrix - N[Outer[Times, Dot[partialexternalmatrix, average], average]];
partialexternalmatrix = Transpose[partialexternalmatrix];

u = Transpose[SingularValues[partialarraylets][[1]]];
gsvdcorrelation =
  Table[
    Sqrt[
      Sum[(Dot[Transpose[partialexternalmatrix][[a]], u]^2)[[b]], {b, 1, 6}] /
      Dot[Transpose[partialexternalmatrix][[a]], Transpose[partialexternalmatrix][[a]]],
      {a, 1, externalarrays}];
Sort[gsvdcorrelation, OrderedQ[{{#2}, {#1}}] &][[1]]

0.318979

limit = 0.35;
```



```

gridx = Table[a, {a, 0, limit, limit/5.}];
framex = gridx;
sizes = Flatten[
  Table[
    Dimensions[
      Characters[
        ToString[framex[[a]]
      ]], {a, 1, 6}]];
Do[
  Do[framex[[a]] = StringJoin[ToString[framex[[a]]], " "],
    {b, 1, size - sizes[[a]]},
  {a, 1, 6}];
framex = Table[{gridx[[a]], framex[[a]]}, {a, 1, 6}];
gridx = Table[{gridx[[a]], RGBColor[0, 0, 0]}, {a, 1, 6}];
framey = Table[{a + 1, externalarrays - a}, {a, 0, externalarrays - 1}];
labelx = "(b) GSVD Basis Correlation";
labely = " ";
g = BarChart[
  Table[gsvdcorrelation[[externalarrays - a]], {a, 0, externalarrays - 1}],
  BarOrientation -> Horizontal,
  PlotRange -> {{0, limit + 0.001}, {0.5, externalarrays + 0.5}},
  AspectRatio -> 1,
  Axes -> False,
  Frame -> True,
  FrameTicks -> {None, framey, framex, None},
  FrameLabel -> {None, labely, labelx, None},
  GridLines -> {gridx, None},
  DisplayFunction -> Identity];
g = FullGraphics[g];
g[[1, 2]] = g[[1, 2]] /.
  Text[labely, {b_, c_}, {1., 0.}] ->
  Text[labely, {b - limit/5., c}, {0, 0}, {0, 1}];
g[[1, 2]] = g[[1, 2]] /.
  Text[labelx, {b_, c_}, {0., -1.}] ->
  Text[labelx, {b, c + 5.3}, {0, -1}, {1, 0}];
g[[1, 2]] = g[[1, 2]] /.
  Text[a_, {b_, c_}, {0., -1.}] ->
  Text[a, {b, c + 4}, {0, 0}, {0, 1}];
q4 = Show[g,
  AspectRatio -> 1.05,
  PlotRange -> All,
  DisplayFunction -> Identity];

```

```
(* SVD Sort External Arrays *)
```

```
genes = genes2;
genenames = TakeColumns[genenames2, 1];
arrays = arrays2;
arraynames = arraynames2;

externalgenenames = TakeColumns[externalgenenames, 1];
list = Flatten[Intersection[genenames, externalgenenames]];
{partialgenes} = Dimensions[list]

{3325}

counter = Table[{Position[genenames, list[[a]]][[1, 1]], list[[a]]}, {a, 1, partialgenes}];
counter = ReplaceAll[counter, {} -> {Null}];
counter = Sort[counter, OrderedQ[{{#1, #2}} &];
list = Flatten[TakeColumns[counter, {2}]];

counter = Table[Flatten[Position[list, genenames[[a, 1]]], {a, 1, genes}];
counter = ReplaceAll[counter, {} -> {Null}];
partialeigenarrays = AppendRows[counter, svdphases, genenames, eigenarrays];
partialeigenarrays = Sort[partialeigenarrays, OrderedQ[{{#1, #2}} &];
partialphases = TakeRows[
  TakeColumns[partialeigenarrays, {2, 2}],
  {1, partialgenes}];
partialgenenames = TakeRows[
  TakeColumns[partialeigenarrays, {3, 3}],
  {1, partialgenes}];
partialeigenarrays = TakeRows[
  TakeColumns[partialeigenarrays, {4, arrays + 3}],
  {1, partialgenes}];
partialeigenarrays = TakeColumns[partialeigenarrays, {1, 11}];

counter = Table[Flatten[Position[list, externalgenenames[[a, 1]]], {a, 1, externalgenes}];
counter = ReplaceAll[counter, {} -> {Null}];
partialexternalmatrix = AppendRows[counter, externalgenenames, externalmatrix];
partialexternalmatrix = Sort[partialexternalmatrix, OrderedQ[{{#1, #2}} &];
partialexternalgenenames = TakeRows[
  TakeColumns[partialexternalmatrix, {2, 2}],
  {1, partialgenes}];
partialexternalmatrix = TakeRows[
  TakeColumns[partialexternalmatrix, {3, externalarrays + 2}],
  {1, partialgenes}];
```

```
(* Center Gene Data *)
```

```
average = Table[1, {a, 1, externalarrays}];
average = N[average / Sqrt[Dot[average, average]]];
partialexternalmatrix =
  partialexternalmatrix - N[Outer[Times, Dot[partialexternalmatrix, average], average]];
```

```
(* Center Array Data *)
```

```
partialexternalmatrix = Transpose[partialexternalmatrix];
average = Table[1, {a, 1, partialgenes}];
average = N[average / Sqrt[Dot[average, average]]];
partialexternalmatrix =
  partialexternalmatrix - N[Outer[Times, Dot[partialexternalmatrix, average], average]];
partialexternalmatrix = Transpose[partialexternalmatrix];
```

(\* Create SVD Basis External Array Correlations Bar Chart Display \*)

```

u = Transpose[SingularValues[partialeigenarrays][[1]]];
svdcorrelation =
  Table[
    Sqrt[
      Sum[(Dot[Transpose[partialexternalmatrix][[a]], u]^2)[[b]], {b, 1, 11}] /
      Dot[Transpose[partialexternalmatrix][[a]], Transpose[partialexternalmatrix][[a]]],
      {a, 1, externalarrays}];
Sort[svdcorrelation, OrderedQ[{{#2}, {#1}}] &][[1]]

0.338071

limit = 0.35;

gridx = Table[a, {a, 0, limit, limit/5.}];
framex = gridx;
sizes = Flatten[
  Table[
    Dimensions[
      Characters[
        ToString[framex[[a]]
      ]], {a, 1, 6}]];
Do[
  Do[framex[[a]] = StringJoin[ToString[framex[[a]]], " "],
  {b, 1, size - sizes[[a]]},
  {a, 1, 6}];
framex = Table[{gridx[[a]], framex[[a]]}, {a, 1, 6}];
gridx = Table[{gridx[[a]], RGBColor[0, 0, 0]}, {a, 1, 6}];
framey = Table[{a + 1, externalarrays - a}, {a, 0, externalarrays - 1}];
labelx = "(a) SVD Basis Correlation";
labeledy = "Arrays";
g = BarChart[
  Table[svdcorrelation[[externalarrays - a]], {a, 0, externalarrays - 1}],
  BarOrientation -> Horizontal,
  PlotRange -> {{0, limit + 0.001}, {0.5, externalarrays + 0.5}},
  AspectRatio -> 1,
  Axes -> False,
  Frame -> True,
  FrameTicks -> {None, framey, framex, None},
  FrameLabel -> {None, labeledy, labelx, None},
  GridLines -> {gridx, None},
  DisplayFunction -> Identity];
g = FullGraphics[g];
g[[1, 2]] = g[[1, 2]] /.
  Text[labeledy, {b_, c_}, {1., 0.}] ->
  Text[labeledy, {b - limit/5., c}, {0, 0}, {0, 1}];
g[[1, 2]] = g[[1, 2]] /.
  Text[labelx, {b_, c_}, {0., -1.}] ->
  Text[labelx, {b, c + 5.3}, {0, -1}, {1, 0}];
g[[1, 2]] = g[[1, 2]] /.
  Text[a_, {b_, c_}, {0., -1.}] ->
  Text[a, {b, c + 4}, {0, 0}, {0, 1}];
q3 = Show[g,
  AspectRatio -> 1.05,
  PlotRange -> All,
  DisplayFunction -> Identity];

```

(\* Project Data Onto SVD Basis \*)

```
externalarraycorrelations = Dot[PseudoInverse[partialeigenarrays], partialexternalmatrix];  
partialexternalmatrix = Dot[partialeigenarrays, externalarraycorrelations];
```

(\* Calculate Contributions of Eigenarrays to External Arrays \*)

```
partialexternalmatrix = Transpose[partialexternalmatrix];  
externalcoordinates = Table[  
  {externalarraycorrelations[[1, a]] /  
    Sqrt[Dot[partialexternalmatrix[[a]], partialexternalmatrix[[a]]]],  
    externalarraycorrelations[[2, a]] /  
    Sqrt[Dot[partialexternalmatrix[[a]], partialexternalmatrix[[a]]]]},  
  {a, 1, externalarrays}];  
partialexternalmatrix = Transpose[partialexternalmatrix];
```

(\* Create Parameter Graph of Arrays Projected Onto 2 D Subspace \*)

```
points1 = {Point[externalcoordinates[[10]]], Point[externalcoordinates[[21]]],  
  Point[externalcoordinates[[22]]], Point[externalcoordinates[[23]]],  
  Point[externalcoordinates[[24]]]};  
points2 = {Point[externalcoordinates[[2]]], Point[externalcoordinates[[3]]],  
  Point[externalcoordinates[[11]]], Point[externalcoordinates[[12]]],  
  Point[externalcoordinates[[13]]]};  
points3 = {Point[externalcoordinates[[4]]], Point[externalcoordinates[[14]]],  
  Point[externalcoordinates[[15]]], Point[externalcoordinates[[16]]]};  
points4 = {Point[externalcoordinates[[5]]]};  
points5 = {Point[externalcoordinates[[1]]], Point[externalcoordinates[[6]]],  
  Point[externalcoordinates[[7]]], Point[externalcoordinates[[8]]],  
  Point[externalcoordinates[[9]]], Point[externalcoordinates[[17]]],  
  Point[externalcoordinates[[18]]], Point[externalcoordinates[[19]]],  
  Point[externalcoordinates[[20]]]};  
textcoordinates = externalcoordinates;  
Do[  
  textcoordinates[[a, 1]] = If[  
    textcoordinates[[a, 1]] > 0,  
    textcoordinates[[a, 1]] - 0.085,  
    textcoordinates[[a, 1]] + 0.095],  
  {a, 1, 9}];  
Do[  
  textcoordinates[[a, 1]] =  
    If[textcoordinates[[a, 1]] > 0,  
      textcoordinates[[a, 1]] - 0.11,  
      textcoordinates[[a, 1]] + 0.12],  
  {a, 10, externalarrays}];  
textcoordinates[[2]] = textcoordinates[[2]] - {0.1, 0.12};  
textcoordinates[[3]] = textcoordinates[[3]] - {0.2, 0};  
textcoordinates[[4]] = textcoordinates[[4]] - {0.2, 0};  
textcoordinates[[5]] = textcoordinates[[5]] - {0.2, 0};  
textcoordinates[[6]] = textcoordinates[[6]] + {0.22, 0.04};  
textcoordinates[[7]] = textcoordinates[[7]] + {0.12, 0.12};  
textcoordinates[[8]] = textcoordinates[[8]] + {0.12, -0.12};  
textcoordinates[[12]] = textcoordinates[[12]] + {0, 0.04};  
textcoordinates[[14]] = textcoordinates[[14]] - {0.25, 0};  
textcoordinates[[16]] = textcoordinates[[16]] + {0.14, 0.1};  
textcoordinates[[17]] = textcoordinates[[17]] - {0.23, 0};  
textcoordinates[[18]] = textcoordinates[[18]] + {0.23, 0};  
textcoordinates[[19]] = textcoordinates[[19]] + {0.08, -0.1};  
textcoordinates[[21]] = textcoordinates[[21]] + {0.23, 0};  
textcoordinates[[22]] = textcoordinates[[22]] + {0.1, 0.12};  
textcoordinates[[23]] = textcoordinates[[23]] - {0.23, 0};  
textcoordinates[[24]] = textcoordinates[[24]] + {0.23, 0};
```

```

texts = Table[Text[a, textcoordinates[[a]]], {a, 1, externalarrays}];
p = Show[
  {Graphics[{RGBColor[1, 1, 0], PointSize[0.035], points1}],
  Graphics[{RGBColor[0, 0.5, 0], PointSize[0.035], points2}],
  Graphics[{RGBColor[0, 0, 1], PointSize[0.035], points3}],
  Graphics[{RGBColor[1, 0, 0], PointSize[0.035], points4}],
  Graphics[{RGBColor[1, 0.5, 0], PointSize[0.035], points5}],
  Graphics[{RGBColor[1, 0.5, 0], Text["G2/M", {1.075, -0.52}]}],
  Graphics[{RGBColor[0, 0, 0], Text["M/G1", {0.9, 0.75}]}],
  Graphics[{RGBColor[1, 0, 0], Text["S/G2", {0.2, -1.12}]}],
  Graphics[{RGBColor[0, 0, 1], Text["S", {-0.95, -0.6}]}],
  Graphics[{RGBColor[0, 0.5, 0], Text["G1", {-0.8, 0.8}]}],
  Graphics[{RGBColor[0, 0, 0], Text["(a)", {-1.1, 1.15}]}],
  Graphics[{RGBColor[0, 0, 0], Text[" $\phi = \pi/2$ ", {0.2, 1.12}]}],
  Graphics[{RGBColor[0, 0, 0], Text[" $\phi = 0$ ", {1.12, 0.12}]}],
  Graphics[texts],
  Graphics[{RGBColor[0, 0, 0], Dashing[{0.03, 0.02}], Circle[{0, 0}, 0.5, {0.*Pi, 2*Pi}]}],
  Graphics[{RGBColor[0, 0, 0], Dashing[{0.03, 0.02}], Circle[{0, 0}, 1]}],
  Graphics[{RGBColor[0, 0, 0], Arrow[{-1.25, 0}, {1.25, 0},
    HeadCenter -> 0.5, HeadLength -> 0.035, HeadWidth -> 0.75]}],
  Graphics[{RGBColor[0, 0, 0], Arrow[{0, -1.25}, {0, 1.25},
    HeadCenter -> 0.5, HeadLength -> 0.035, HeadWidth -> 0.75]}],
  Graphics[{RGBColor[0, 0, 0], Circle[{0, 0}, 0.6,
    {ArcTan[externalcoordinates[[1, 2]] / externalcoordinates[[1, 1]]],
    ArcTan[externalcoordinates[[19, 2]] / externalcoordinates[[19, 1]]}]}],
  Graphics[{RGBColor[0, 0, 0], Arrow[
    {0.6 * Cos[-0.05 + ArcTan[externalcoordinates[[19, 2]] / externalcoordinates[[19, 1]]],
    0.6 * Sin[-0.05 + ArcTan[externalcoordinates[[19, 2]] / externalcoordinates[[19, 1]]]},
    {0.6 * Cos[ArcTan[externalcoordinates[[19, 2]] / externalcoordinates[[19, 1]]],
    0.6 * Sin[ArcTan[externalcoordinates[[19, 2]] / externalcoordinates[[19, 1]]]},
    HeadCenter -> 0.5, HeadLength -> 0.035, HeadWidth -> 0.75]}],
  AspectRatio -> 1,
  PlotRange -> {{-1.25, 1.25}, {-1.25, 1.25}},
  Frame -> True,
  FrameTicks -> False,
  FrameLabel -> {None, None, None, None},
  GridLines -> {{{0, RGBColor[0, 0, 0]}}, {{0, RGBColor[0, 0, 0]}},
  DisplayFunction -> Identity];
p = FullGraphics[p];
p[[1, 2]] = p[[1, 2]] /.
  Text[labely, {b_, c_}, {1., 0.}] ->
  Text[labely, {-1.18, 0}, {0, 0}, {0, 1}];
s1 = Show[p,
  AspectRatio -> 1.,
  PlotRange -> All,
  DisplayFunction -> Identity];

```

(\* Classify SVD Gene Phases into Cell Cycle Phases \*)

```
ph1 = 0;  
ph2 = -1 / 2.;  
ph3 = -1.;  
ph4 = -4 / 3.;  
ph5 = -5 / 3.;
```

```
endph5 = partialgenes;  
beginph1 = 1;  
partialphases[[endph5]] - ph1  
partialphases[[beginph1]] - ph1
```

```
{0.000221307}
```

```
{-0.000407097}
```

```
endph1 = 709;  
beginph2 = 710;  
partialphases[[endph1]] - ph2  
partialphases[[beginph2]] - ph2
```

```
{0.000187677}
```

```
{0.999788}
```

```
endph2 = 1366;  
beginph3 = 1367;  
partialphases[[endph2]] - ph3  
partialphases[[beginph3]] - ph3
```

```
{1.00101}
```

```
{0.999626}
```

```
endph3 = 1865;  
beginph4 = 1866;  
partialphases[[endph3]] - ph4  
partialphases[[beginph4]] - ph4
```

```
{1.00001}
```

```
{0.999004}
```

```
endph4 = 2686;  
beginph5 = 2687;  
partialphases[[endph4]] - ph5  
partialphases[[beginph5]] - ph5
```

```
{2.00032}
```

```
{1.99995}
```

(\* 3325 yeast genes, 709 in M/G1, 657 in G1, 499 in S, 821 in S/G2, 639 in G2/M. \*)

```

(* Display SVD Reconstructed and Sorted External Data *)

(* SVD Reconstruct Sorted External Data *)

matrix = partialexternalmatrix;

(* Create SVD Reconstructed Sorted External Data 2 D Red & Green Raster Display *)

contrast = 10 * 1.5;
displaying = Table[
  If[contrast * matrix[[i, j]] > 0,
    If[contrast * matrix[[i, j]] < 1, {contrast * matrix[[i, j]], 0}, {1, 0}],
    If[contrast * matrix[[i, j]] > -1, {0, -contrast * matrix[[i, j]]}, {0, 1}]],
  {i, 1, partialgenes}, {j, 1, externalarrays}];
framex = Table[{a - 0.5, externalarraynames[[2, a]]}, {a, 1, externalarrays}];
framey = {
  {partialgenes - endph1 / 2, "M/G1"},
  {partialgenes - (endph1 + endph2) / 2, "G1"},
  {partialgenes - (endph2 + endph3) / 2, "S"},
  {partialgenes - (endph3 + endph4) / 2, "S/G2"},
  {(partialgenes - endph4) / 2, "G2/M"}}];
gridy = {
  {partialgenes - endph1 + 0.5, {RGBColor[0, 0, 0]}},
  {partialgenes - endph2 + 0.5, {RGBColor[0, 0, 0]}},
  {partialgenes - endph3 + 0.5, {RGBColor[0, 0, 0]}},
  {partialgenes - endph4 + 0.5, {RGBColor[0, 0, 0]}}];
labelx = "(a) Arrays";
labely = ColumnForm[{" ", "Genes", " ", " ", " ", " ", " ", " ", " "}, Center];
g = Show[
  Graphics[
    RasterArray[
      Table[
        RGBColor[displaying[[i, j, 1]], displaying[[i, j, 2]], 0],
        {i, partialgenes, 1, -1}, {j, 1, externalarrays}]]],
  AspectRatio -> 1,
  Frame -> True,
  FrameTicks -> {None, framey, framex, None},
  FrameLabel -> {None, labely, labelx, None},
  GridLines -> {None, gridy},
  DisplayFunction -> Identity];

g = FullGraphics[g];
g[[1, 2]] = g[[1, 2]] /.
  Text[labely, {b_, c_}, {1., 0.}] ->
  Text[labely, {b, c}, {0, 0}, {0, 1}];
g[[1, 2]] = g[[1, 2]] /.
  Text[a_, {b_, c_}, {1., 0.}] ->
  Text[a, {b - 1.5, c}, {0, 0}, {0, 1}];
g[[1, 2]] = g[[1, 2]] /.
  Text[labelx, {b_, c_}, {0., -1.}] ->
  Text[labelx, {b, c + 1400}, {0, -1}, {1, 0}];
g[[1, 2]] = g[[1, 2]] /.
  Text[a_, {b_, c_}, {0., -1.}] ->
  Text[a, {b, c + 700}, {0, 0}, {0, 1}];
g1 = Show[g,
  AspectRatio -> GoldenRatio * 1.2,
  PlotRange -> All,
  DisplayFunction -> Identity];

```

(\* Create Reconstructed Sorted External Data Graph Display \*)

```
matrix = Transpose[matrix];
matrixplot = Table[0, {a, 1, externalarrays}];
Do[
  matrixplot[[a]] = Chop[TrigFit[matrix[[a]], 1, {x, partialgenes - 1}], 0.02],
  {a, 1, externalarrays}]
table = Table[
  {externalarraynames[[2, a]], matrixplot[[a]]}, {a, 1, externalarrays}];
TableForm[table]

c_10min      0.0228943 - 0.0742822 Sin[  $\frac{\pi x}{1662}$  ]
c_30min      0.024142 - 0.0488941 Cos[  $\frac{\pi x}{1662}$  ]
c_50min      -0.133288 Cos[  $\frac{\pi x}{1662}$  ]
c_70min      -0.0294803 Cos[  $\frac{\pi x}{1662}$  ] - 0.0800656 Sin[  $\frac{\pi x}{1662}$  ]
c_80min      -0.0382924 Cos[  $\frac{\pi x}{1662}$  ] - 0.0476319 Sin[  $\frac{\pi x}{1662}$  ]
c_90min      -0.0254685 Cos[  $\frac{\pi x}{1662}$  ] - 0.122499 Sin[  $\frac{\pi x}{1662}$  ]
c_100min     0.0489285 Cos[  $\frac{\pi x}{1662}$  ] - 0.0591578 Sin[  $\frac{\pi x}{1662}$  ]
c_110min     0.0234884 Cos[  $\frac{\pi x}{1662}$  ] - 0.0685371 Sin[  $\frac{\pi x}{1662}$  ]
c_120min     0.07527 Cos[  $\frac{\pi x}{1662}$  ]
c_130min     -0.0201401 Cos[  $\frac{\pi x}{1662}$  ] + 0.0231013 Sin[  $\frac{\pi x}{1662}$  ]
c_140min     -0.024612 Cos[  $\frac{\pi x}{1662}$  ] + 0.122708 Sin[  $\frac{\pi x}{1662}$  ]
c_150min     -0.070311 Cos[  $\frac{\pi x}{1662}$  ] + 0.0280971 Sin[  $\frac{\pi x}{1662}$  ]
c_160min     -0.0623872 Cos[  $\frac{\pi x}{1662}$  ] + 0.121001 Sin[  $\frac{\pi x}{1662}$  ]
c_170min     -0.0566786 Cos[  $\frac{\pi x}{1662}$  ]
c_180min     0.0206253 Sin[  $\frac{\pi x}{1662}$  ]
c_190min     -0.0894523 Sin[  $\frac{\pi x}{1662}$  ]
c_200min     -0.0311128 Sin[  $\frac{\pi x}{1662}$  ]
c_210min     0.0306943 Cos[  $\frac{\pi x}{1662}$  ] - 0.0699062 Sin[  $\frac{\pi x}{1662}$  ]
c_220min     0.0293425 Cos[  $\frac{\pi x}{1662}$  ]
c_230min     0.149017 Cos[  $\frac{\pi x}{1662}$  ] + 0.0280899 Sin[  $\frac{\pi x}{1662}$  ]
c_240min     0.0321831 Cos[  $\frac{\pi x}{1662}$  ] + 0.0433264 Sin[  $\frac{\pi x}{1662}$  ]
c_250min     0.0308584 Cos[  $\frac{\pi x}{1662}$  ] + 0.0505389 Sin[  $\frac{\pi x}{1662}$  ]
c_270min     0.0421422 Sin[  $\frac{\pi x}{1662}$  ]
c_290min     -0.0399727 + 0.101134 Cos[  $\frac{\pi x}{1662}$  ] + 0.132049 Sin[  $\frac{\pi x}{1662}$  ]

p = Table[0, {a, 1, externalarrays}];
color = {
  RGBColor[0.75, 0, 1],
  RGBColor[1, 0, 0],
  RGBColor[1, 0.5, 0],
  RGBColor[0, 0.5, 0],
  RGBColor[0, 0, 1]};
labelx = "(b) Expression Level";
framex = Table[{0.5 * a, externalarraynames[[2, a]]},
  {a, 1, externalarrays}];
```



```

Do[{
  graph = ParametricPlot[{matrixplot[[n]] + 0.5 * n, -x},
    {x, 0, partialgenes - 1},
    PlotStyle -> {RGBColor[0, 0, 0]},
    DisplayFunction -> Identity],
  coordinates = Table[
    If[matrix[[n, a]] + 0.5 * n < 0, 0,
      If[matrix[[n, a]] + 0.5 * n > 12.5, 12.5,
        matrix[[n, a]] + 0.5 * n]],
    {a, 1, partialgenes}],
  coordinates = Table[{coordinates[[a]], -a + 1}, {a, 1, partialgenes}],
  line = Line[coordinates],
  g = Show[{
    Graphics[{color[[Mod[n, 5] + 1]], line}],
    graph},
  Frame -> True,
  FrameLabel -> {None, None, labelx, None},
  FrameTicks -> {None, None, framex, None},
  GridLines -> {{{0.5 * n, RGBColor[0, 0, 0]}}, None},
  PlotRange -> {{0, 12.5}, {95, -partialgenes + 1 - 95}},
  DisplayFunction -> Identity],
  g = FullGraphics[g],
  g[[1, 2]] = g[[1, 2]] /.
  Text[labely, {b_, c_}, {1., 0.}] ->
  Text[labely, {b, c}, {0, 0}, {0, 1}],
  g[[1, 2]] = g[[1, 2]] /.
  Text[labelx, {b_, c_}, {0., -1.}] ->
  Text[labelx, {b, c + 1400}, {0, -1}, {1, 0}],
  g[[1, 2]] = g[[1, 2]] /.
  Text[a_, {b_, c_}, {0., -1.}] ->
  Text[a, {b, c + 700}, {0, 0}, {0, 1}],
  p[[n]] = Show[g,
    AspectRatio -> GoldenRatio * 1.2 / 3,
    PlotRange -> All,
    DisplayFunction -> Identity]
}, {n, 1, externalarrays}];

g2 = Show[Table[p[[a]], {a, 1, externalarrays}],
  DisplayFunction -> Identity];

```

(\* Display Correlations of External Arrays with SVD and GSVD Bases \*)

```
Show[GraphicsArray[{q3, q4}],
GraphicsSpacing -> -0.12];
```

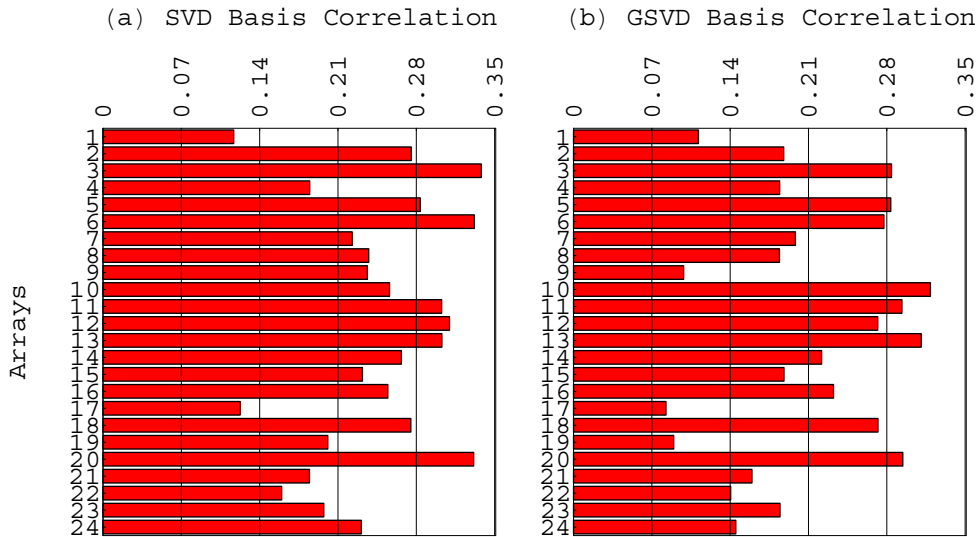

(\* Display SVD and GSVD Sorted External Data \*)

```
q1 = Show[{
Graphics[{Rectangle[{0, 0}, {60, 75}, g1]}],
Graphics[{Rectangle[{60, 0}, {192, 75}, g2}]}],
PlotRange -> All,
DisplayFunction -> Identity];
q2 = Show[{
Graphics[{Rectangle[{0, 0}, {60, 75}, g3}]}],
Graphics[{Rectangle[{60, 0}, {192, 75}, g4}]}],
PlotRange -> All,
DisplayFunction -> Identity];
Show[GraphicsArray[{{q1}, {q2}}],
GraphicsSpacing -> -0.24];
```

(a) Arrays

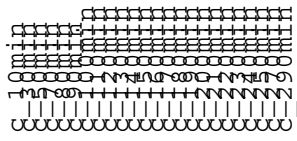

(b) Expression Level

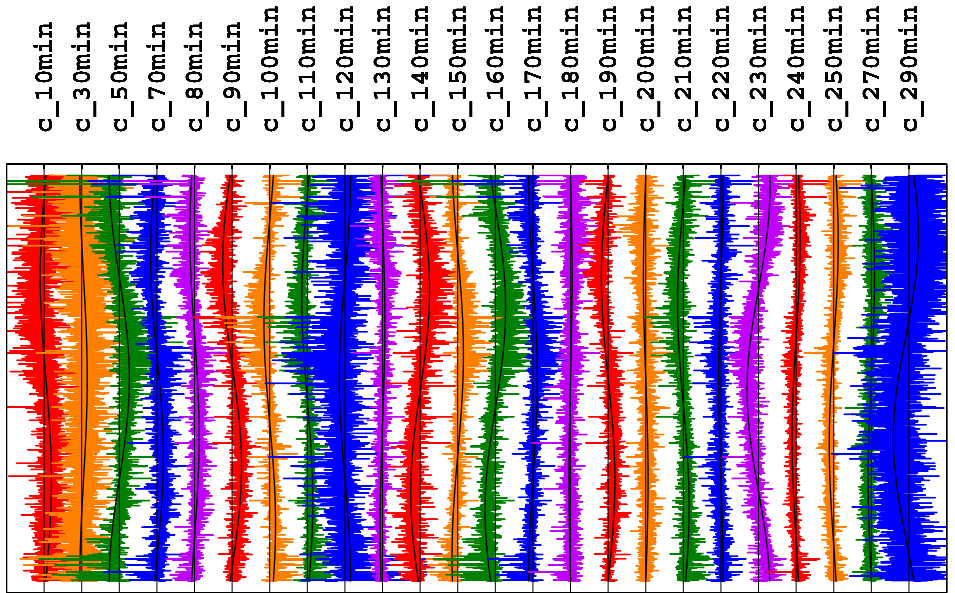

(c) Arrays

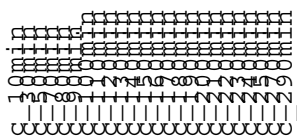

(d) Expression Level

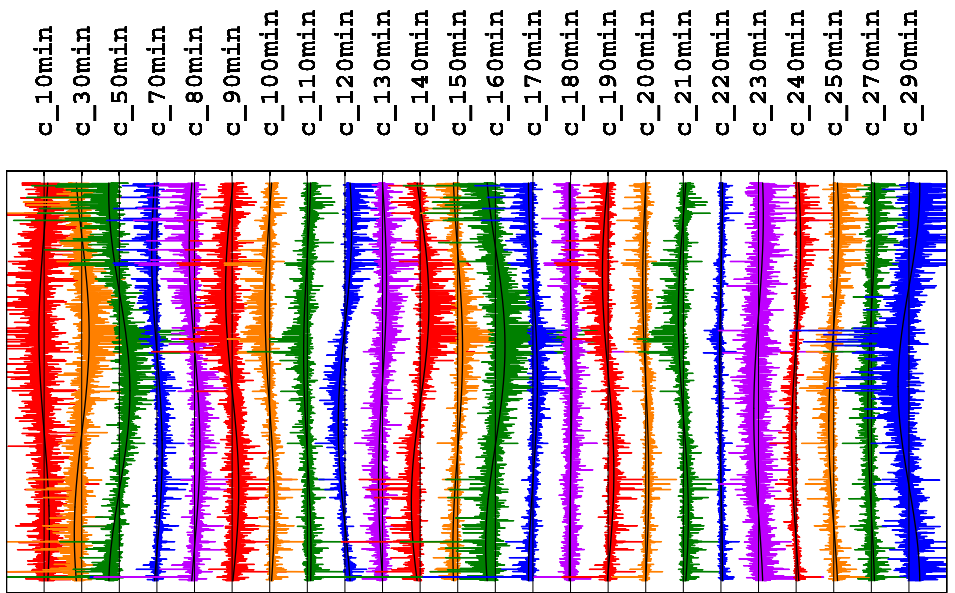

(\* Display Mapping of Cdc15 Time Course Data \*)

```
Show[GraphicsArray[{s1, s2}],
GraphicsSpacing -> 0];
```

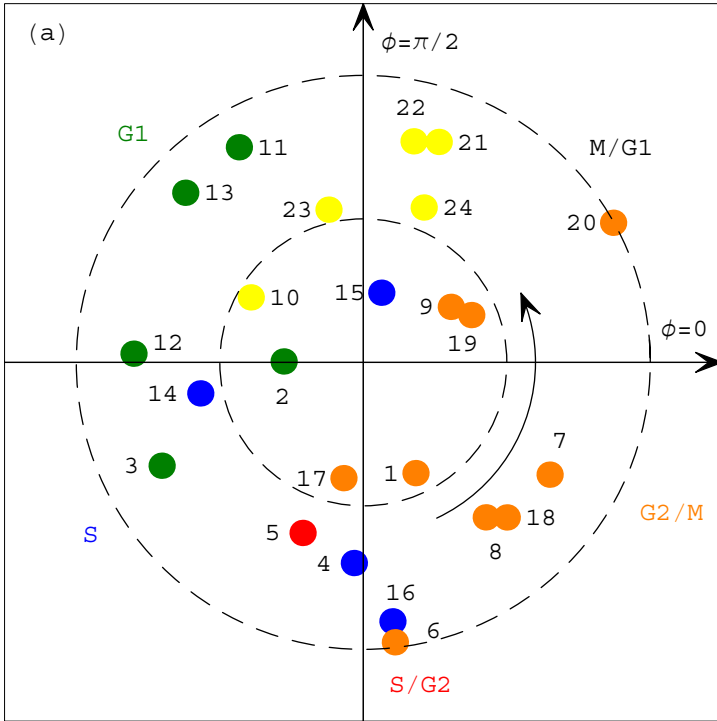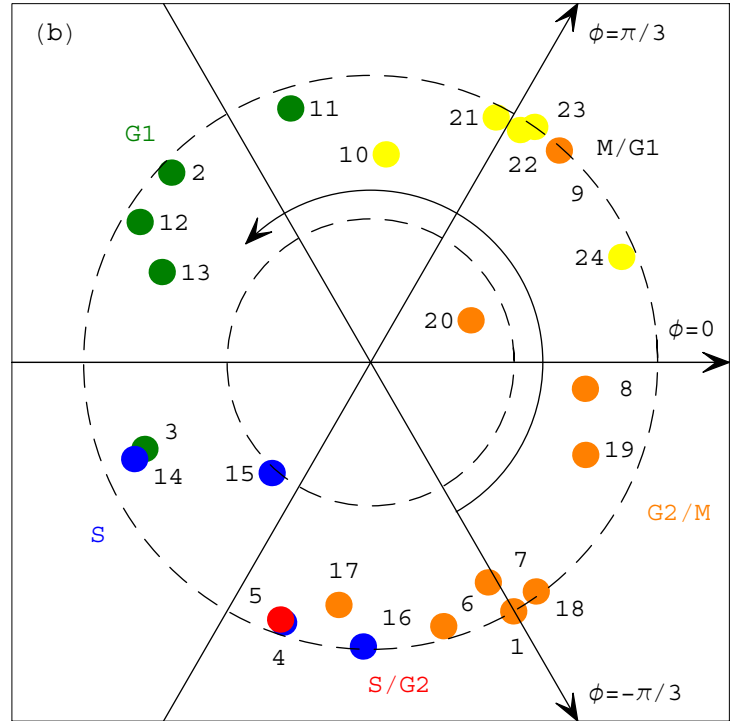

```
(* Map Yeast Protein Binding Data *)
```

```
(* Read Data *)
```

```
stream = "Desktop/Networks/Data/Protein_Bind.txt.nb";
externalmatrix = ReadList[stream, Word, RecordLists -> True, NullWords -> True];
{externalgenes, externalarrays} = Dimensions[externalmatrix] - {1, 3}
Clear[stream];

{2928, 13}

externalgenenames = TakeRows[
  TakeColumns[externalmatrix, {1, 3}],
  {2, externalgenes + 1}];
externalarraynames = TakeColumns[
  TakeRows[externalmatrix, {1, 1}],
  {4, externalarrays + 3}];
externalmatrix = TakeColumns[
  TakeRows[externalmatrix, {2, externalgenes + 1}],
  {4, externalarrays + 3}];
externalmatrix = ToExpression[externalmatrix];

sizes = Flatten[
  Table[
    Dimensions[
      Characters[
        ToString[externalarraynames[[1, a]]
        ]]],
    {a, 1, externalarrays}]];
size = Sort[sizes, OrderedQ[{{#2, #1}}] &][[1]];
Do[
  Do[externalarraynames[[1, a]] = StringJoin[ToString[externalarraynames[[1, a]]], " ",
    {b, 1, size - sizes[[a]]}],
  {a, 1, externalarrays}];
```

```
(* Convert to Ratios *)
```

```
average = Table[1, {a, 1, externalarrays}];
average = N[average / Sqrt[Dot[average, average]]];
externalmatrix =
  externalmatrix / N[Outer[Times, Dot[externalmatrix, average], average]];
```

```
(* Display Sorted External Arrays *)
```

```
arraypatterns = Transpose[externalmatrix];
```

```
(* Center External Arrays *)
```

```
average = Table[1, {a, 1, externalgenes}];
average = N[average / Sqrt[Dot[average, average]]];
arraypatterns = arraypatterns - N[Outer[Times, Dot[arraypatterns, average], average]];
```

```
(* Normalize External Arrays *)
```

```
Do[
  arraypatterns[[a]] =
    arraypatterns[[a]] / Sqrt[Dot[arraypatterns[[a]], arraypatterns[[a]]],
  {a, 1, externalarrays}]
```

```
(* Sort External Arrays *)
```

```
Do[  
  arraypatterns[[a]] = Sort[arraypatterns[[a]], OrderedQ[{{#2}, {#1}}] &],  
  {a, 1, externalarrays}]
```

```
(* Create Sorted External Arrays Graph Display *)
```

```
p = Table[0, {a, 1, externalarrays}];  
color = {  
  RGBColor[0.75, 0, 1],  
  RGBColor[1, 0, 0],  
  RGBColor[1, 0.5, 0],  
  RGBColor[0, 0.5, 0],  
  RGBColor[0, 0, 1]};  
labelx = "Binding Level";  
labely = ColumnForm[  
  {" ", "Number of ORFs", " ", " ", " ", " ", " ", " ", " ", " ", " "},  
  Center];  
framex = Table[{0.02 * a, externalarraynames[[1, a]]},  
  {a, 1, externalarrays}];  
framey = {{-200, "200"}, {-1500, "1500"}, {-externalgenes + 200, "2728"}};
```

```
Do[{  
  coordinates = Table[  
    If[arraypatterns[[n, a]] + 0.02 * n < -0.02, -0.02,  
      If[arraypatterns[[n, a]] + 0.02 * n > 0.3, 0.3,  
        arraypatterns[[n, a]] + 0.02 * n]],  
    {a, 1, externalgenes}],  
  coordinates = Table[{coordinates[[a]], -a + 1}, {a, 1, externalgenes}],  
  line = Line[coordinates],  
  g = Show[  
    Graphics[{color[[Mod[n, 5] + 1]], line}],  
    Frame -> True,  
    FrameLabel -> {None, labely, labelx, None},  
    FrameTicks -> {None, framey, framex, None},  
    GridLines -> {{{0.02 * n, RGBColor[0, 0, 0]}}, {{-200, RGBColor[0, 0, 0]},  
      {-1500, RGBColor[0, 0, 0]}, {-externalgenes + 200, RGBColor[0, 0, 0]}},  
    PlotRange -> {{-0.02, 0.3}, {135, -externalgenes + 1 - 135}},  
    DisplayFunction -> Identity],  
  g = FullGraphics[g],  
  g[[1, 2]] = g[[1, 2]] /.  
    Text[labely, {b_, c_}, {1., 0.}] ->  
    Text[labely, {b, c}, {0, 0}, {0, 1}],  
  g[[1, 2]] = g[[1, 2]] /.  
    Text[labelx, {b_, c_}, {0., -1.}] ->  
    Text[labelx, {b, c + 500}, {0, -1}, {1, 0}],  
  g[[1, 2]] = g[[1, 2]] /.  
    Text[a_, {b_, c_}, {0., -1.}] ->  
    Text[a, {b, c + 250}, {0, 0}, {0, 1}],  
  p[[n]] = Show[g,  
    AspectRatio -> 1 / 1.2 / GoldenRatio,  
    PlotRange -> All,  
    DisplayFunction -> Identity]  
}, {n, 1, externalarrays}];
```

(\* Display Sorted External Arrays \*)

```
Show[Table[p[[a]], {a, 1, externalarrays}],  
  DisplayFunction -> $DisplayFunction];
```

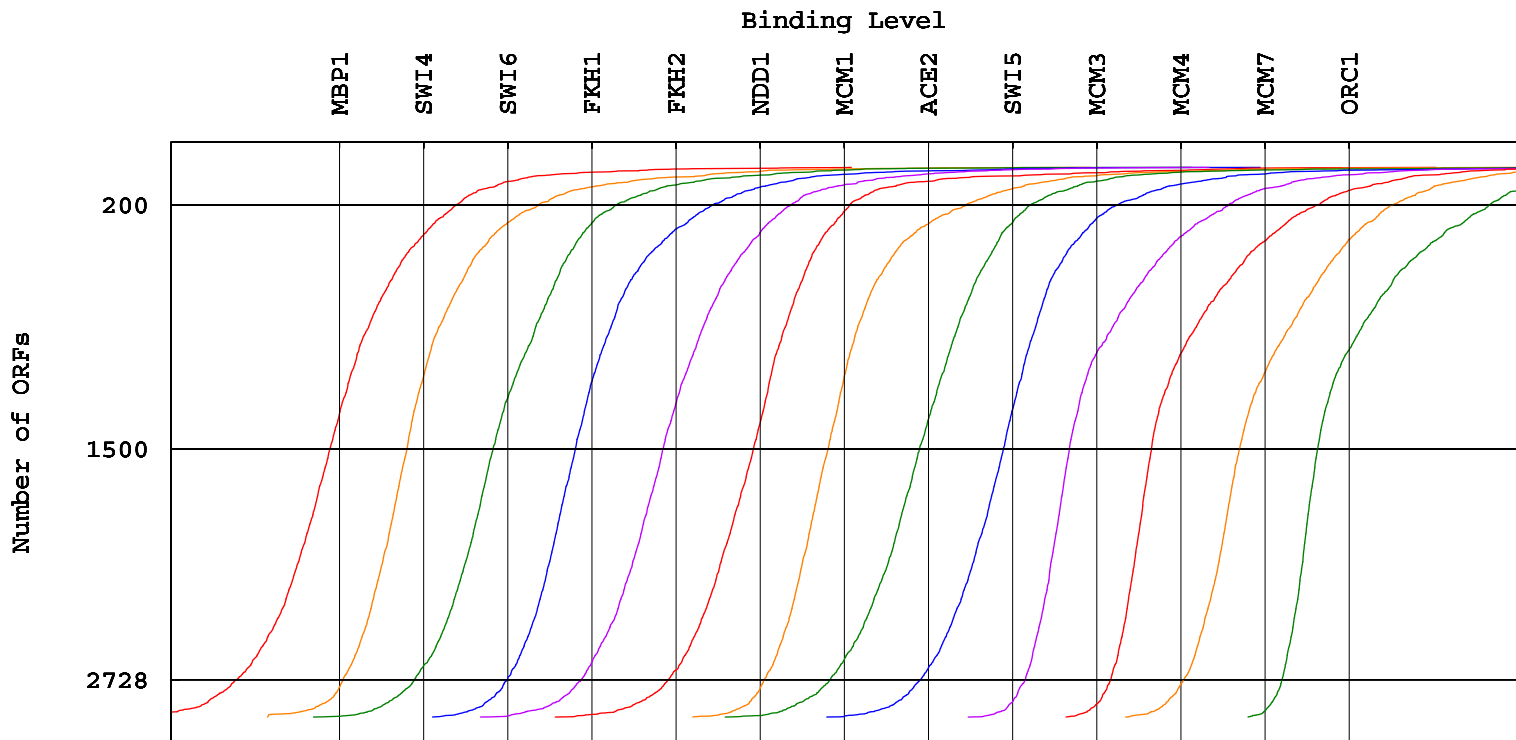

(\* Estimate Significance of Association of External Data with the Cell Cycle \*)

(\* Use Microarray Classification of Yeast Genes \*)

```
most = 200;
genenames = TakeColumns[externalgenenames, {2}];
stages = {"M/G1", "G1", "S", "S/G2", "G2/M", "None"};
numbers = Flatten[Table[{Count[Flatten[genenames], stages[[a]]], {a, 1, Dimensions[stages][[1]]}]];
genelet = Table[{a}, {a, 1, externalarrays}];
probability = Table[{0}, {a, 1, Dimensions[genelet][[1]]}];
parallelannotation = Table[{0}, {a, 1, Dimensions[genelet][[1]]}];
parallelprobability = Table[{0}, {a, 1, Dimensions[genelet][[1]]}];
antiannotation = Table[{0}, {a, 1, Dimensions[genelet][[1]]}];
antiprobability = Table[{0}, {a, 1, Dimensions[genelet][[1]]}];

Do[{
  arraylet = TakeColumns[Sort[
    AppendRows[TakeColumns[externalmatrix, genelet[[c]], genenames],
    OrderedQ[{{#2}, {#1}}] &], {2}],
  table = Table[{
    stages[[a]],
    numbers[[a]],
    Count[Flatten[TakeRows[arraylet, {1, most}]], stages[[a]]],
    {a, 1, Dimensions[stages][[1]]}],
  probability = Table[{
    Sum[N[Binomial[table[[a, 2]], b] * Binomial[externalgenes - table[[a, 2]], most - b] /
      Binomial[externalgenes, most]], {b, table[[a, 3]], most}],
    stages[[a]],
    {a, 1, Dimensions[stages][[1]]}],
  parallelannotation[[c]] = {Sort[probability, OrderedQ[{{#1}, {#2}}] &][[1, 2]]},
  parallelprobability[[c]] = {ScientificForm[Sort[probability, OrderedQ[{{#1}, {#2}}] &][[1, 1], 2]}},
  table = Table[{
    stages[[a]],
    numbers[[a]],
    Count[Flatten[TakeRows[arraylet, {externalgenes - most + 1, externalgenes}]], stages[[a]]],
    {a, 1, Dimensions[stages][[1]]}],
  probability = Table[{
    Sum[N[Binomial[table[[a, 2]], b] * Binomial[externalgenes - table[[a, 2]], most - b] /
      Binomial[externalgenes, most]], {b, table[[a, 3]], most}],
    stages[[a]],
    {a, 1, Dimensions[stages][[1]]}],
  antiannotation[[c]] = {Sort[probability, OrderedQ[{{#1}, {#2}}] &][[1, 2]]},
  antiprobability[[c]] = {ScientificForm[Sort[probability, OrderedQ[{{#1}, {#2}}] &][[1, 1], 2]}},
  {c, 1, Dimensions[genelet][[1]]}

table1 = AppendRows [
  Table[{externalarraynames[[1, a]], {a, 1, externalarrays}},
  parallelannotation,
  parallelprobability,
  antiannotation,
  antiprobability];
```



(\* Use Traditional Classification of Yeast Genes \*)

```
most = 200;
genenames = TakeColumns[externalgenenames, {3}];
stages = {"M/G1", "G1", "S", "S/G2", "G2/M", "None"};
numbers = Flatten[Table[{Count[Flatten[genenames], stages[[a]]]}, {a, 1, Dimensions[stages][[1]]}]];
genelet = Table[{a}, {a, 1, externalarrays}];
probability = Table[{0}, {a, 1, Dimensions[genelet][[1]]}];
parallelannotation = Table[{0}, {a, 1, Dimensions[genelet][[1]]}];
parallelprobability = Table[{0}, {a, 1, Dimensions[genelet][[1]]}];
antiannotation = Table[{0}, {a, 1, Dimensions[genelet][[1]]}];
antiprobability = Table[{0}, {a, 1, Dimensions[genelet][[1]]}];

Do[{
  arraylet = TakeColumns[Sort[
    AppendRows[TakeColumns[externalmatrix, genelet[[c]], genenames],
    OrderedQ[{{#2}, {#1}}] &], {2}],
  table = Table[{
    stages[[a]],
    numbers[[a]],
    Count[Flatten[TakeRows[arraylet, {1, most}]], stages[[a]]],
    {a, 1, Dimensions[stages][[1]]}],
  probability = Table[{
    Sum[N[Binomial[table[[a, 2]], b] * Binomial[externalgenes - table[[a, 2]], most - b] /
      Binomial[externalgenes, most]], {b, table[[a, 3]], most}],
    stages[[a]],
    {a, 1, Dimensions[stages][[1]]}],
  parallelannotation[[c]] = {Sort[probability, OrderedQ[{{#1}, {#2}}] &][[1, 2]]},
  parallelprobability[[c]] = {ScientificForm[Sort[probability, OrderedQ[{{#1}, {#2}}] &][[1, 1]], 2]},
  table = Table[{
    stages[[a]],
    numbers[[a]],
    Count[Flatten[TakeRows[arraylet, {externalgenes - most + 1, externalgenes}]], stages[[a]]],
    {a, 1, Dimensions[stages][[1]]}],
  probability = Table[{
    Sum[N[Binomial[table[[a, 2]], b] * Binomial[externalgenes - table[[a, 2]], most - b] /
      Binomial[externalgenes, most]], {b, table[[a, 3]], most}],
    stages[[a]],
    {a, 1, Dimensions[stages][[1]]}],
  antiannotation[[c]] = {Sort[probability, OrderedQ[{{#1}, {#2}}] &][[1, 2]]},
  antiprobability[[c]] = {ScientificForm[Sort[probability, OrderedQ[{{#1}, {#2}}] &][[1, 1]], 2]},
  {c, 1, Dimensions[genelet][[1]]}

table2 = AppendRows[
  Table[{externalarraynames[[1, a]], {a, 1, externalarrays}},
  parallelannotation,
  parallelprobability,
  antiannotation,
  antiprobability];
```

(\* Display Significance of Association of External Arrays with the Cell Cycle \*)

```

headerx = {{
  ColumnForm[{" ", " ", " "}, Left],
  ColumnForm[{" ", " ", "Classification"}, Left],
  ColumnForm[{" ", "External", "Array"}, Left],
  ColumnForm[{"Most Likely", "Parallel", "Association"}, Left],
  ColumnForm[{"P-Value of", "Parallel", "Association"}, Left],
  ColumnForm[{"Most Likely", "Antiparallel", "Association"}, Left],
  ColumnForm[{"P-Value of", "Antiparallel", "Association"}, Left]},
{" ", " ", " ", " ", " ", " ", " ", " ", " ", " "}};
spacerx = {" ", " ", " ", " ", " "};
headery = Table[" ", {a, 1, 2*externalarrays + 1}, {b, 1, 2}];
headery[[1]] = {"(a)", "Microarray"};
headery[[externalarrays + 2]] = {"(b)", "Traditional"};
association =
  AppendColumns[headerx,
  AppendRows[headery,
  AppendColumns[table1, spacerx, table2]]];
TableForm[association, TableSpacing -> {1, 1}]

```

|      | Classification | External Array       | Most Likely Parallel Association | P-Value of Parallel Association | Most Likely Antiparallel Association | P-Value of Antiparallel Association |
|------|----------------|----------------------|----------------------------------|---------------------------------|--------------------------------------|-------------------------------------|
| (a)  | Microarray     | MBP1                 | G1                               | $1.6 \times 10^{-14}$           | None                                 | $4. \times 10^{-3}$                 |
|      |                | SWI4                 | G1                               | $1.5 \times 10^{-17}$           | None                                 | $1.2 \times 10^{-1}$                |
|      |                | SWI6                 | G1                               | $4.7 \times 10^{-32}$           | G2/M                                 | $7.3 \times 10^{-2}$                |
|      |                | FKH1                 | S/G2                             | $7.2 \times 10^{-4}$            | None                                 | $3.5 \times 10^{-1}$                |
|      |                | FKH2                 | G2/M                             | $3.9 \times 10^{-11}$           | None                                 | $8.3 \times 10^{-2}$                |
|      |                | NDD1                 | G2/M                             | $2. \times 10^{-19}$            | G1                                   | $9.5 \times 10^{-2}$                |
|      |                | MCM1                 | G2/M                             | $1.2 \times 10^{-12}$           | G1                                   | $4. \times 10^{-3}$                 |
|      |                | ACE2                 | M/G1                             | $1.1 \times 10^{-3}$            | G2/M                                 | $8.4 \times 10^{-3}$                |
|      |                | SWI5                 | M/G1                             | $1.3 \times 10^{-15}$           | G1                                   | $4.5 \times 10^{-5}$                |
|      |                | MCM3                 | None                             | $4.5 \times 10^{-4}$            | G1                                   | $7.9 \times 10^{-10}$               |
|      |                | MCM4                 | None                             | $1.3 \times 10^{-2}$            | G1                                   | $1.2 \times 10^{-8}$                |
|      |                | MCM7                 | None                             | $1.3 \times 10^{-2}$            | G1                                   | $7.9 \times 10^{-10}$               |
| ORC1 | None           | $4. \times 10^{-3}$  | G1                               | $4.3 \times 10^{-13}$           |                                      |                                     |
| (b)  | Traditional    | MBP1                 | G1                               | $2.7 \times 10^{-10}$           | None                                 | $9.3 \times 10^{-2}$                |
|      |                | SWI4                 | G1                               | $2.7 \times 10^{-7}$            | None                                 | $9.3 \times 10^{-2}$                |
|      |                | SWI6                 | G1                               | $4.8 \times 10^{-19}$           | G2/M                                 | $4.4 \times 10^{-2}$                |
|      |                | FKH1                 | S/G2                             | $4. \times 10^{-2}$             | S                                    | $3.9 \times 10^{-1}$                |
|      |                | FKH2                 | G2/M                             | $3.7 \times 10^{-6}$            | None                                 | $2.7 \times 10^{-2}$                |
|      |                | NDD1                 | G2/M                             | $5. \times 10^{-9}$             | M/G1                                 | $3.3 \times 10^{-1}$                |
|      |                | MCM1                 | G2/M                             | $1.6 \times 10^{-7}$            | G1                                   | $3.3 \times 10^{-2}$                |
|      |                | ACE2                 | M/G1                             | $1.1 \times 10^{-1}$            | S                                    | $7.8 \times 10^{-2}$                |
|      |                | SWI5                 | M/G1                             | $6.2 \times 10^{-4}$            | G2/M                                 | $6.2 \times 10^{-5}$                |
|      |                | MCM3                 | None                             | $2.7 \times 10^{-2}$            | G1                                   | $5. \times 10^{-4}$                 |
|      |                | MCM4                 | None                             | $4. \times 10^{-3}$             | G1                                   | $2.4 \times 10^{-3}$                |
|      |                | MCM7                 | None                             | $2.7 \times 10^{-2}$            | G1                                   | $5. \times 10^{-4}$                 |
| ORC1 | None           | $2.2 \times 10^{-1}$ | G1                               | $5. \times 10^{-4}$             |                                      |                                     |

(\* GSVD Sort External Arrays \*)

```
genes = genes1;
genenames = TakeColumns[genenames1, 1];
arrays = arrays1;
arraynames = arraynames1;

externalgenenames = TakeColumns[externalgenenames, 1];
list = Flatten[Intersection[genenames, externalgenenames]];
{partialgenes} = Dimensions[list]

{2139}

counter = Table[{Position[genenames, list[[a]]][[1, 1]], list[[a]]}, {a, 1, partialgenes}];
counter = ReplaceAll[counter, {} -> {Null}];
counter = Sort[counter, OrderedQ[{{#1, #2}} &];
list = Flatten[TakeColumns[counter, {2}]];

counter = Table[Flatten[Position[list, genenames[[a, 1]]], {a, 1, genes}];
counter = ReplaceAll[counter, {} -> {Null}];
partialarraylets = AppendRows[counter, gsvdphases, genenames, arraylets1];
partialarraylets = Sort[partialarraylets, OrderedQ[{{#1, #2}} &];
partialphases = TakeRows[
  TakeColumns[partialarraylets, {2, 2}],
  {1, partialgenes}];
partialgenenames = TakeRows[
  TakeColumns[partialarraylets, {3, 3}],
  {1, partialgenes}];
partialarraylets = TakeRows[
  TakeColumns[partialarraylets, {4, arrays + 3}],
  {1, partialgenes}];

counter = Table[Flatten[Position[list, externalgenenames[[a, 1]]], {a, 1, externalgenes}];
counter = ReplaceAll[counter, {} -> {Null}];
partialexternalmatrix = AppendRows[counter, externalgenenames, externalmatrix];
partialexternalmatrix = Sort[partialexternalmatrix, OrderedQ[{{#1, #2}} &];
partialexternalgenenames = TakeRows[
  TakeColumns[partialexternalmatrix, {2, 2}],
  {1, partialgenes}];
partialexternalmatrix = TakeRows[
  TakeColumns[partialexternalmatrix, {3, externalarrays + 2}],
  {1, partialgenes}];
```

(\* Project Data Onto GSVD Basis and Calculate Contributions of Arraylets to External Arrays \*)

```
partialarraylets = Transpose[partialarraylets];
average = Table[1, {a, 1, partialgenes}];
average = N[average / Sqrt[Dot[average, average]]];
partialarraylets =
  partialarraylets - N[Outer[Times, Dot[partialarraylets, average], average]];
partialarraylets = Transpose[partialarraylets];

arraycontributions = Dot[PseudoInverse[partialarraylets], partialexternalmatrix];
average = Table[1, {a, 1, externalarrays}];
average = N[average / Sqrt[Dot[average, average]]];
arraycontributions =
  arraycontributions - N[Outer[Times, Dot[arraycontributions, average], average]];
```

(\* Project GSVD Reconstructed Replication Initiation Protein Data Onto  
GSVD Reconstructed Transcription Factor Data \*)

```
partialexternalmatrix1 = TakeColumns[partialexternalmatrix, {1, 9}];
partialexternalmatrix2 = TakeColumns[partialexternalmatrix, {10, 13}];
arraycontributions12 = Transpose[Dot[
  Dot[PseudoInverse[partialexternalmatrix1], partialarraylets],
  Dot[PseudoInverse[partialarraylets], partialexternalmatrix2]]];
```

(\* Project Arrays from 6 D Arraylets Subspace Onto 2 D Subspace \*)

```
externalcoordinates = Table[{
  (-Sqrt[3] * (arraycontributions[[3, a]] - arraycontributions[[15, a]]) +
    2 * Sqrt[3] * (arraycontributions[[4, a]] - arraycontributions[[16, a]]) +
    (3 * arraycontributions[[5, a]] + Sqrt[3] * arraycontributions[[14, a]])) / 6 /
  Sqrt[(arraycontributions[[3, a]] - arraycontributions[[15, a]])^2 / 3 +
    (arraycontributions[[4, a]] - arraycontributions[[16, a]])^2 / 3 +
    (arraycontributions[[5, a]] + arraycontributions[[14, a]] / Sqrt[3])^2 +
    Abs[(arraycontributions[[3, a]] - arraycontributions[[15, a]]) / Sqrt[3] *
      (arraycontributions[[4, a]] - arraycontributions[[16, a]]) / Sqrt[3] +
    Abs[(arraycontributions[[3, a]] - arraycontributions[[15, a]]) / Sqrt[3] *
      (arraycontributions[[5, a]] + arraycontributions[[14, a]] / Sqrt[3])] +
    Abs[(arraycontributions[[4, a]] - arraycontributions[[16, a]]) / Sqrt[3] *
      (arraycontributions[[5, a]] + arraycontributions[[14, a]] / Sqrt[3])]],
  (3 * (arraycontributions[[3, a]] - arraycontributions[[15, a]]) +
    Sqrt[3] * (3 * arraycontributions[[5, a]] + Sqrt[3] * arraycontributions[[14, a]])) / 6 /
  Sqrt[(arraycontributions[[3, a]] - arraycontributions[[15, a]])^2 / 3 +
    (arraycontributions[[4, a]] - arraycontributions[[16, a]])^2 / 3 +
    (arraycontributions[[5, a]] + arraycontributions[[14, a]] / Sqrt[3])^2 +
    Abs[(arraycontributions[[3, a]] - arraycontributions[[15, a]]) / Sqrt[3] *
      (arraycontributions[[4, a]] - arraycontributions[[16, a]]) / Sqrt[3] +
    Abs[(arraycontributions[[3, a]] - arraycontributions[[15, a]]) / Sqrt[3] *
      (arraycontributions[[5, a]] + arraycontributions[[14, a]] / Sqrt[3])] +
    Abs[(arraycontributions[[4, a]] - arraycontributions[[16, a]]) / Sqrt[3] *
      (arraycontributions[[5, a]] + arraycontributions[[14, a]] / Sqrt[3])]],
  {a, 1, externalarrays}];
```

(\* Create Parameter Graph of Arrays Projected Onto 2 D Subspace \*)

```
points1 = {Point[externalcoordinates[[1]], Point[externalcoordinates[[2]]],
  Point[externalcoordinates[[3]]]};
points2 = {Point[externalcoordinates[[4]]]};
points3 = {Point[externalcoordinates[[5]], Point[externalcoordinates[[6]]],
  Point[externalcoordinates[[7]]]};
points4 = {Point[externalcoordinates[[8]], Point[externalcoordinates[[9]]]};
points5 = {Point[externalcoordinates[[10]], Point[externalcoordinates[[11]]],
  Point[externalcoordinates[[12]], Point[externalcoordinates[[13]]]};
```

```

p = Show[
  {Graphics[{RGBColor[0, 0.5, 0], PointSize[0.035], points1}},
  Graphics[{RGBColor[1, 0, 0], PointSize[0.035], points2}},
  Graphics[{RGBColor[1, 0.5, 0], PointSize[0.035], points3}},
  Graphics[{RGBColor[1, 1, 0], PointSize[0.035], points4}},
  Graphics[{RGBColor[0.75, 0, 1], PointSize[0.035], points5}},
  Graphics[{RGBColor[1, 0.5, 0], Text["G2/M", {1.075, -0.52}]}],
  Graphics[{RGBColor[0, 0, 0], Text["M/G1", {0.9, 0.75}]}],
  Graphics[{RGBColor[1, 0, 0], Text["S/G2", {0.1, -1.12}]}],
  Graphics[{RGBColor[0, 0, 1], Text["S", {-0.95, -0.6}]}],
  Graphics[{RGBColor[0, 0.5, 0], Text["G1", {-0.8, 0.8}]}],
  Graphics[{RGBColor[0, 0, 0], Text["(b)", {-1.1, 1.15}]}],
  Graphics[{RGBColor[0, 0, 0], Text[" $\phi=\pi/3$ ", {0.925, 1.15}]}],
  Graphics[{RGBColor[0, 0, 0], Text[" $\phi=0$ ", {1.12, 0.12}]}],
  Graphics[{RGBColor[0, 0, 0], Text[" $\phi=-\pi/3$ ", {0.925, -1.15}]}],
  Graphics[{RGBColor[0, 0, 0], Text["MBP1", externalcoordinates[[1]] + {0.2, 0}]}],
  Graphics[{RGBColor[0, 0, 0], Text["SWI4", externalcoordinates[[2]] + {0.13, -0.13}]}],
  Graphics[{RGBColor[0, 0, 0], Text["SWI6", externalcoordinates[[3]] - {0.2, 0}]}],
  Graphics[{RGBColor[0, 0, 0], Text["FKH1", externalcoordinates[[4]] + {0.2, 0.02}]}],
  Graphics[{RGBColor[0, 0, 0], Text["FKH2", externalcoordinates[[5]] - {0.08, 0.12}]}],
  Graphics[{RGBColor[0, 0, 0], Text["NDD1", externalcoordinates[[6]] + {0, 0.13}]}],
  Graphics[{RGBColor[0, 0, 0], Text["MCM1", externalcoordinates[[7]] - {0.2, 0}]}],
  Graphics[{RGBColor[0, 0, 0], Text["ACE2", externalcoordinates[[8]] + {0, 0.15}]}],
  Graphics[{RGBColor[0, 0, 0], Text["SWI5", externalcoordinates[[9]] - {0, 0.15}]}],
  Graphics[{RGBColor[0, 0, 0], Text["MCM3", externalcoordinates[[10]] + {0.275, 0}]}],
  Graphics[{RGBColor[0, 0, 0], Text["MCM4", externalcoordinates[[11]] + {0.06, 0.15}]}],
  Graphics[{RGBColor[0, 0, 0], Text["MCM7", externalcoordinates[[12]] + {0.16, 0.09}]}],
  Graphics[{RGBColor[0, 0, 0], Text["ORC1", externalcoordinates[[13]] + {0.03, 0.13}]}],
  Graphics[{RGBColor[0, 0, 0], Dashing[{0.03, 0.02}], Circle[{0, 0}, 0.5]}],
  Graphics[{RGBColor[0, 0, 0], Dashing[{0.03, 0.02}], Circle[{0, 0}, 1]}],
  Graphics[{RGBColor[0, 0, 0], Arrow[{-1.25 / Tan[Pi / 3.], 1.25}, {1.25 / Tan[Pi / 3.], -1.25}],
  HeadCenter -> 0.5, HeadLength -> 0.035, HeadWidth -> 0.75]}],
  Graphics[{RGBColor[0, 0, 0], Arrow[{-1.25, 0}, {1.25, 0}],
  HeadCenter -> 0.5, HeadLength -> 0.035, HeadWidth -> 0.75]}],
  Graphics[{RGBColor[0, 0, 0], Arrow[{-1.25 / Tan[Pi / 3.], -1.25}, {1.25 / Tan[Pi / 3.], 1.25}],
  HeadCenter -> 0.5, HeadLength -> 0.035, HeadWidth -> 0.75]}],
  AspectRatio -> 1,
  PlotRange -> {{-1.25, 1.25}, {-1.25, 1.25}},
  Frame -> True,
  FrameTicks -> False,
  FrameLabel -> {None, None, None, None},
  GridLines -> {None, {{0, RGBColor[0, 0, 0]}}},
  DisplayFunction -> Identity];
p = FullGraphics[p];
p[[1, 2]] = p[[1, 2]] /.
  Text[labely, {b_, c_}, {1., 0.}] ->
  Text[labely, {-1.18, 0}, {0, 0}, {0, 1}];
m2 = Show[p,
  AspectRatio -> 1.0,
  PlotRange -> All,
  DisplayFunction -> Identity];

```

(\* Classify GSVD Gene Phases into Cell Cycle Phases \*)

```
ph1 = 0;  
ph2 = -1 / 2.;  
ph3 = -1.;  
ph4 = -4 / 3.;  
ph5 = -5 / 3.;
```

```
endph5 = partialgenes;  
beginph1 = 1;  
partialphases[[endph5]] - ph1  
partialphases[[beginph1]] - ph1
```

```
{0.0000468343}
```

```
{-0.000239433}
```

```
endph1 = 528;  
beginph2 = 529;  
partialphases[[endph1]] - ph2  
partialphases[[beginph2]] - ph2
```

```
{0.00415166}
```

```
{0.999706}
```

```
endph2 = 1038;  
beginph3 = 1039;  
partialphases[[endph2]] - ph3  
partialphases[[beginph3]] - ph3
```

```
{1.00032}
```

```
{0.99936}
```

```
endph3 = 1366;  
beginph4 = 1367;  
partialphases[[endph3]] - ph4  
partialphases[[beginph4]] - ph4
```

```
{1.0009}
```

```
{0.99987}
```

```
endph4 = 1849;  
beginph5 = 1850;  
partialphases[[endph4]] - ph5  
partialphases[[beginph5]] - ph5
```

```
{2.00019}
```

```
{1.99914}
```

(\* 2139 yeast genes, 528 in M/G1, 510 in G1, 328 in S, 483 in S/G2, 290 in G2/M. \*)

```
(* Display GSVD Reconstructed Sorted External Data *)
```

```
(* GSVD Reconstruct Sorted External Data *)
```

```
partialarraylets = Transpose[partialarraylets];  
partialarraylets = Drop[partialarraylets, {17, 18}];  
partialarraylets = Drop[partialarraylets, {6, 13}];  
partialarraylets = Drop[partialarraylets, {1, 2}];  
partialarraylets = Transpose[partialarraylets];  
  
arraycontributions = Drop[arraycontributions, {17, 18}];  
arraycontributions = Drop[arraycontributions, {6, 13}];  
arraycontributions = Drop[arraycontributions, {1, 2}];  
  
matrix = Dot[partialarraylets, arraycontributions];
```

```
(* Center GSVD Reconstructed Sorted External Data *)
```

```
average = Table[1, {a, 1, externalarrays}];  
average = N[average / Sqrt[Dot[average, average]]];  
matrix = matrix - N[Outer[Times, Dot[matrix, average], average]];  
matrix = Transpose[matrix];  
average = Table[1, {a, 1, partialgenes}];  
average = N[average / Sqrt[Dot[average, average]]];  
matrix = matrix - N[Outer[Times, Dot[matrix, average], average]];  
matrix = Transpose[matrix];
```

```
(* Create GSVD Reconstructed Sorted External Data 2 D Red & Green Raster Display *)
```

```
contrast = 10 * 1.5;  
displaying = Table[  
  If[contrast * matrix[[i, j]] > 0,  
    If[contrast * matrix[[i, j]] < 1, {contrast * matrix[[i, j]], 0}, {1, 0}],  
    If[contrast * matrix[[i, j]] > -1, {0, -contrast * matrix[[i, j]]}, {0, 1}]],  
  {i, 1, partialgenes}, {j, 1, externalarrays}];  
framex = Table[{a - 0.5, externalarraynames[[1, a]]}, {a, 1, externalarrays}];  
framey = {  
  {partialgenes - endph1 / 2, "M/G1"},  
  {partialgenes - (endph1 + endph2) / 2, "G1"},  
  {partialgenes - (endph2 + endph3) / 2, "S"},  
  {partialgenes - (endph3 + endph4) / 2, "S/G2"},  
  {(partialgenes - endph4) / 2, "G2/M"}];  
gridy = {  
  {partialgenes - endph1 + 0.5, {RGBColor[0, 0, 0]}},  
  {partialgenes - endph2 + 0.5, {RGBColor[0, 0, 0]}},  
  {partialgenes - endph3 + 0.5, {RGBColor[0, 0, 0]}},  
  {partialgenes - endph4 + 0.5, {RGBColor[0, 0, 0]}}];  
labelx = "(c) Samples";  
labely = ColumnForm[{"ORFs", " ", " ", " ", " ", " ", " ", " ", " "}, Center];  
g = Show[  
  Graphics[  
    RasterArray[  
      Table[  
        RGBColor[displaying[[i, j, 1]], displaying[[i, j, 2]], 0],  
        {i, partialgenes, 1, -1}, {j, 1, externalarrays}]]],  
  AspectRatio -> 1,  
  Frame -> True,  
  FrameTicks -> {None, framey, framex, None},  
  FrameLabel -> {None, labely, labelx, None},  
  GridLines -> {None, gridy},  
  DisplayFunction -> Identity];
```



```

g = FullGraphics[g];
g[[1, 2]] = g[[1, 2]] /.
  Text[labely, {b_, c_}, {1., 0.}] →
  Text[labely, {b, c}, {0, 0}, {0, 1}];
g[[1, 2]] = g[[1, 2]] /.
  Text[a_, {b_, c_}, {1., 0.}] →
  Text[a, {b - 1.5, c}, {0, 0}, {0, 1}];
g[[1, 2]] = g[[1, 2]] /.
  Text[labelx, {b_, c_}, {0., -1.}] →
  Text[labelx, {b, c + 340}, {0, -1}, {1, 0}];
g[[1, 2]] = g[[1, 2]] /.
  Text[a_, {b_, c_}, {0., -1.}] →
  Text[a, {b, c + 150}, {0, 0}, {0, 1}];
g3 = Show[g,
  AspectRatio -> GoldenRatio * 1.2,
  PlotRange -> All,
  DisplayFunction -> Identity];

```

(\* Create GSVD Reconstructed Sorted External Data Graph Display \*)

```

matrix = Transpose[matrix];
matrixplot = Table[0, {a, 1, externalarrays}];
Do[
  matrixplot[[a]] = Chop[TrigFit[matrix[[a]], 1, {x, partialgenes - 1}], 0.005],
  {a, 1, externalarrays}]
table = Table[
  {externalarraynames[[1, a]], matrixplot[[a]]}, {a, 1, externalarrays}];
TableForm[table]

```

```

MBP1      -0.0388423 Cos[ $\frac{\pi x}{1069}$ ] + 0.0282288 Sin[ $\frac{\pi x}{1069}$ ]
SWI4      -0.0807485 Cos[ $\frac{\pi x}{1069}$ ] + 0.0405207 Sin[ $\frac{\pi x}{1069}$ ]
SWI6      -0.0771488 Cos[ $\frac{\pi x}{1069}$ ] + 0.0407178 Sin[ $\frac{\pi x}{1069}$ ]
FKH1      -0.00949282 Sin[ $\frac{\pi x}{1069}$ ]
FKH2      -0.0125451 Sin[ $\frac{\pi x}{1069}$ ]
NDD1      0.0257796 Cos[ $\frac{\pi x}{1069}$ ] - 0.0142828 Sin[ $\frac{\pi x}{1069}$ ]
MCM1      0.035563 Cos[ $\frac{\pi x}{1069}$ ]
ACE2      0.0164531 Cos[ $\frac{\pi x}{1069}$ ] + 0.0307157 Sin[ $\frac{\pi x}{1069}$ ]
SWI5      0.0516627 Sin[ $\frac{\pi x}{1069}$ ]
MCM3      0.0406182 Cos[ $\frac{\pi x}{1069}$ ] - 0.0130613 Sin[ $\frac{\pi x}{1069}$ ]
MCM4      0.0280758 Cos[ $\frac{\pi x}{1069}$ ] - 0.0389401 Sin[ $\frac{\pi x}{1069}$ ]
MCM7      0.0231392 Cos[ $\frac{\pi x}{1069}$ ] - 0.0247272 Sin[ $\frac{\pi x}{1069}$ ]
ORC1      0.0242502 Cos[ $\frac{\pi x}{1069}$ ] - 0.0834609 Sin[ $\frac{\pi x}{1069}$ ]

```

```

p = Table[0, {a, 1, externalarrays}];
color = {
  RGBColor[0.75, 0, 1],
  RGBColor[1, 0, 0],
  RGBColor[1, 0.5, 0],
  RGBColor[0, 0.5, 0],
  RGBColor[0, 0, 1]};
labelx = "(d) Binding Level";
framex = Table[{0.2 * a, externalarraynames[[1, a]]},
  {a, 1, externalarrays}];

```

```

Do[{
  graph = ParametricPlot[{matrixplot[[n]] + 0.2 * n, -x},
    {x, 0, partialgenes - 1},
    PlotStyle -> {RGBColor[0, 0, 0]},
    DisplayFunction -> Identity],
  coordinates = Table[
    If[matrix[[n, a]] + 0.2 * n < 0, 0,
      If[matrix[[n, a]] + 0.2 * n > 2.8, 2.8,
        matrix[[n, a]] + 0.2 * n]],
    {a, 1, partialgenes}],
  coordinates = Table[{coordinates[[a]], -a + 1}, {a, 1, partialgenes}],
  line = Line[coordinates],
  g = Show[{
    Graphics[{color[[Mod[n, 5] + 1]], line}],
    graph},
  Frame -> True,
  FrameLabel -> {None, None, labelx, None},
  FrameTicks -> {None, None, framex, None},
  GridLines -> {{{0.2 * n, RGBColor[0, 0, 0]}}, None},
  PlotRange -> {{0, 2.8}, {65, -partialgenes + 1 - 65}},
  DisplayFunction -> Identity],
  g = FullGraphics[g],
  g[[1, 2]] = g[[1, 2]] /.
    Text[labely, {b_, c_}, {1., 0.}] ->
    Text[labely, {b, c}, {0, 0}, {0, 1}],
  g[[1, 2]] = g[[1, 2]] /.
    Text[labelx, {b_, c_}, {0., -1.}] ->
    Text[labelx, {b, c + 330}, {0, -1}, {1, 0}],
  g[[1, 2]] = g[[1, 2]] /.
    Text[a_, {b_, c_}, {0., -1.}] ->
    Text[a, {b, c + 142.5}, {0, 0}, {0, 1}],
  p[[n]] = Show[g,
    AspectRatio -> GoldenRatio * 1.2 / 2.5,
    PlotRange -> All,
    DisplayFunction -> Identity]
}, {n, 1, externalarrays}];
matrix = Transpose[matrix];

g4 = Show[Table[p[[a]], {a, 1, externalarrays}],
  DisplayFunction -> Identity];

```

```
(* Display Projection Onto GSVD Cell Cycle Subspace *)
```

```
(* Center GSVD Sorted External Data *)
```

```
average = Table[1, {a, 1, externalarrays}];  
average = N[average / Sqrt[Dot[average, average]]];  
partialexternalmatrix =  
  partialexternalmatrix - N[Outer[Times, Dot[partialexternalmatrix, average], average]];  
partialexternalmatrix = Transpose[partialexternalmatrix];  
average = Table[1, {a, 1, partialgenes}];  
average = N[average / Sqrt[Dot[average, average]]];  
partialexternalmatrix =  
  partialexternalmatrix - N[Outer[Times, Dot[partialexternalmatrix, average], average]];  
partialexternalmatrix = Transpose[partialexternalmatrix];
```

```
(* Create GSVD Sorted External Data 2 D Red & Green Raster Display *)
```

```
contrast = 1.5 * 1.5;  
displaying = Table[  
  If[contrast * partialexternalmatrix[[i, j]] > 0,  
    If[contrast * partialexternalmatrix[[i, j]] < 1,  
      {contrast * partialexternalmatrix[[i, j]], 0}, {1, 0}],  
    If[contrast * partialexternalmatrix[[i, j]] > -1,  
      {0, -contrast * partialexternalmatrix[[i, j]]}, {0, 1}]],  
  {i, 1, partialgenes}, {j, 1, externalarrays}];  
framex = Table[{a - 0.5, externalarraynames[[1, a]]}, {a, 1, externalarrays}];  
labelx = "Samples";  
labely = ColumnForm[{" ", "          ORFs", " ", " ", " ", " ", " "}, Center];  
g = Show[  
  Graphics[  
    RasterArray[  
      Table[  
        RGBColor[displaying[[i, j, 1]], displaying[[i, j, 2]], 0],  
        {i, partialgenes, 1, -1}, {j, 1, externalarrays}]]],  
    AspectRatio -> 1,  
    Frame -> True,  
    FrameTicks -> {None, None, framex, None},  
    FrameLabel -> {None, labely, labelx, None},  
    GridLines -> {None, None},  
    DisplayFunction -> Identity];  
g = FullGraphics[g];  
g[[1, 2]] = g[[1, 2]] /.  
  Text[labely, {b_, c_}, {1., 0.}] ->  
  Text[labely, {b, c}, {0, 0}, {0, 1}];  
g[[1, 2]] = g[[1, 2]] /.  
  Text[labelx, {b_, c_}, {0., -1.}] ->  
  Text[labelx, {b, c + 400}, {0, -1}, {1, 0}];  
g[[1, 2]] = g[[1, 2]] /.  
  Text[a_, {b_, c_}, {0., -1.}] ->  
  Text[a, {b, c + 200}, {0, 0}, {0, 1}];  
p5 = Show[g,  
  AspectRatio -> GoldenRatio * 1.2,  
  PlotRange -> All,  
  DisplayFunction -> Identity];
```

(\* Create GSVD Reconstructed Sorted External Data 2D Red & Green Raster Display \*)

```

contrast = 10 * 1.5;
displaying = Table[
  If[contrast * matrix[[i, j]] > 0,
    If[contrast * matrix[[i, j]] < 1,
      {contrast * matrix[[i, j]], 0}, {1, 0}],
    If[contrast * matrix[[i, j]] > -1,
      {0, -contrast * matrix[[i, j]]}, {0, 1}]],
  {i, 1, partialgenes}, {j, 1, externalarrays}];
framex = Table[{a - 0.5, externalarraynames[[1, a]]}, {a, 1, externalarrays}];
labelx = "Samples";
labely = ColumnForm[{" ", "          ORFs", " ", " ", " ", " ", " "}, Center];
g = Show[
  Graphics[
    RasterArray[
      Table[
        RGBColor[displaying[[i, j, 1]], displaying[[i, j, 2]], 0],
        {i, partialgenes, 1, -1}, {j, 1, externalarrays}]]],
  AspectRatio -> 1,
  Frame -> True,
  FrameTicks -> {None, None, framex, None},
  FrameLabel -> {None, labely, labelx, None},
  GridLines -> {None, None},
  DisplayFunction -> Identity];

g = FullGraphics[g];
g[[1, 2]] = g[[1, 2]] /.
  Text[labely, {b_, c_}, {1., 0.}] ->
  Text[labely, {b, c}, {0, 0}, {0, 1}];
g[[1, 2]] = g[[1, 2]] /.
  Text[a_, {b_, c_}, {1., 0.}] ->
  Text[a, {b - 1.8, c}, {0, 0}, {0, 1}];
g[[1, 2]] = g[[1, 2]] /.
  Text[labelx, {b_, c_}, {0., -1.}] ->
  Text[labelx, {b, c + 400}, {0, -1}, {1, 0}];
g[[1, 2]] = g[[1, 2]] /.
  Text[a_, {b_, c_}, {0., -1.}] ->
  Text[a, {b, c + 200}, {0, 0}, {0, 1}];
p6 = Show[g,
  AspectRatio -> GoldenRatio * 1.2,
  PlotRange -> All,
  DisplayFunction -> Identity];

```

```
(* Create GSVD Sorted Arraylets 2 D Red & Green Raster Display *)
```

```
contrast = 10 * 15;
displaying = Table[
  If[contrast * partialarraylets[[i, j]] > 0,
    If[contrast * partialarraylets[[i, j]] < 1,
      {contrast * partialarraylets[[i, j]], 0}, {1, 0}],
    If[contrast * partialarraylets[[i, j]] > -1,
      {0, -contrast * partialarraylets[[i, j]]}, {0, 1}]],
  {i, 1, partialgenes}, {j, 1, 6}];
framex = {{0.5, "3"}, {1.5, "4"}, {2.5, "5"}, {3.5, "14"}, {4.5, "15"}, {5.5, "16"}];
labelx = "Arraylets";
labely = ColumnForm[{"", "ORFs", "", "", "", "", ""}, Center];
g = Show[
  Graphics[
    RasterArray[
      Table[
        RGBColor[displaying[[i, j, 1]], displaying[[i, j, 2]], 0],
        {i, partialgenes, 1, -1}, {j, 1, 6}]]],
  AspectRatio -> 1,
  Frame -> True,
  FrameTicks -> {None, None, framex, None},
  FrameLabel -> {None, labely, labelx, None},
  GridLines -> {None, None},
  DisplayFunction -> Identity];

g = FullGraphics[g];
g[[1, 2]] = g[[1, 2]] /.
  Text[labely, {b_, c_}, {1., 0.}] ->
  Text[labely, {b, c}, {0, 0}, {0, 1}];
g[[1, 2]] = g[[1, 2]] /.
  Text[labelx, {b_, c_}, {0., -1.}] ->
  Text[labelx, {b, c + 400}, {0, -1}, {1, 0}];
g[[1, 2]] = g[[1, 2]] /.
  Text[a_, {b_, c_}, {0., -1.}] ->
  Text[a, {b, c + 200}, {0, 0}, {0, 1}];
p7 = Show[g,
  AspectRatio -> GoldenRatio * 1.2 * 2,
  PlotRange -> All,
  DisplayFunction -> Identity];
```

```
(* Create Arraylets Contributions to External Arrays 2 D Red & Green Raster Display *)
```

```
contrast = 0.5;
displaying = Table[
  If[contrast * arraycontributions[[i, j]] > 0,
    If[contrast * arraycontributions[[i, j]] < 1,
      {contrast * arraycontributions[[i, j]], 0}, {1, 0}],
    If[contrast * arraycontributions[[i, j]] > -1,
      {0, -contrast * arraycontributions[[i, j]]}, {0, 1}]],
  {i, 1, 6}, {j, 1, externalarrays}];
framex = Table[{a - 0.5, externalarraynames[[1, a]]}, {a, 1, externalarrays}];
framey = {{0.5, "16"}, {1.5, "15"}, {2.5, "14"}, {3.5, "5"}, {4.5, "4"}, {5.5, "3"}};
labely = ColumnForm[{" ", "Arraylets", " "}, Center];
labelx = ColumnForm[{"Samples", " ", " "}, Center];
g = Show[
  Graphics[
    RasterArray[
      Table[
        RGBColor[displaying[[i, j, 1]], displaying[[i, j, 2]], 0],
        {i, 6, 1, -1}, {j, 1, externalarrays}]]],
  AspectRatio -> 1,
  Frame -> True,
  FrameTicks -> {None, framey, framex, None},
  FrameLabel -> {None, labely, labelx, None},
  DisplayFunction -> Identity];
g = FullGraphics[g];
g[[1, 2]] = g[[1, 2]] /.
  Text[labely, {b_, c_}, {1., 0.}] ->
  Text[labely, {b - 3, c}, {0, 0}, {0, 1}];
g[[1, 2]] = g[[1, 2]] /.
  Text[labelx, {b_, c_}, {0., -1.}] ->
  Text[labelx, {b, c + 0.9}, {0, -1}, {1, 0}];
g[[1, 2]] = g[[1, 2]] /.
  Text[a_, {b_, c_}, {0., -1.}] ->
  Text[a, {b, c + 1.6}, {0, 0}, {0, 1}];
p8 = Show[g,
  AspectRatio -> 1.05 / 2,
  PlotRange -> All,
  DisplayFunction -> Identity];
```

```
(* Display GSVD Correlations *)
```

```
(* Create GSVD Basis External Array Correlations Bar Chart Display *)
```

```
u = Transpose[SingularValues[partialarraylets][[1]]];  
gsvdcorrelation =  
  Table[  
    Sqrt[  
      Sum[(Dot[Transpose[partialexternalmatrix][[a]], u]^2)[[b]], {b, 1, 6}] /  
      Dot[Transpose[partialexternalmatrix][[a]], Transpose[partialexternalmatrix][[a]]],  
      {a, 1, externalarrays}];  
Sort[gsvdcorrelation, OrderedQ[{{#2}, {#1}}] &][[1]]
```

```
0.267766
```

```
limit = 0.3;
```

```
gridx = Table[a, {a, 0, limit, limit/5.}];  
framex = gridx;  
sizes = Flatten[  
  Table[  
    Dimensions[  
      Characters[  
        ToString[framex[[a]]  
      ]], {a, 1, 6}];  
Do[  
  Do[framex[[a]] = StringJoin[ToString[framex[[a]]], " "],  
    {b, 1, size - sizes[[a]]},  
    {a, 1, 6};  
framex = Table[{gridx[[a]], framex[[a]]}, {a, 1, 6};  
gridx = Table[{gridx[[a]], RGBColor[0, 0, 0]}, {a, 1, 6};  
framey = Table[{13 - a + 1, externalarraynames[[1, a]]}, {a, 1, 13};  
labelx = "(b) GSVD Basis Correlation";  
labely = " ";
```

```
g = BarChart[  
  Table[gsvdcorrelation[[externalarrays - a]], {a, 0, externalarrays - 1}],  
  BarOrientation -> Horizontal,  
  PlotRange -> {{0, limit + 0.001}, {0.5, externalarrays + 0.5}},  
  AspectRatio -> 1,  
  Axes -> False,  
  Frame -> True,  
  FrameTicks -> {None, framey, framex, None},  
  FrameLabel -> {None, labely, labelx, None},  
  GridLines -> {gridx, None},  
  DisplayFunction -> Identity];
```

```
g = FullGraphics[g];  
g[[1, 2]] = g[[1, 2]] /.  
  Text[labely, {b_, c_}, {1., 0.}] ->  
  Text[labely, {b - 0.077, c}, {0, 0}, {0, 1}];  
g[[1, 2]] = g[[1, 2]] /.  
  Text[labelx, {b_, c_}, {0., -1.}] ->  
  Text[labelx, {b, c + 3}, {0, -1}, {1, 0}];  
g[[1, 2]] = g[[1, 2]] /.  
  Text[a_, {b_, c_}, {0., -1.}] ->  
  Text[a, {b, c + 1.5}, {0, 0}, {0, 1}];  
q4 = Show[g,  
  AspectRatio -> 1.05,  
  PlotRange -> All,  
  DisplayFunction -> Identity];
```

```
(* Create GSVD Transcription Factor Basis Replication Initiation Protein Sample
Correlations Bar Chart Display *)
```

```
partialexternalmatrix1 = TakeColumns[partialexternalmatrix, {1, 9}];
partialexternalmatrix2 = TakeColumns[partialexternalmatrix, {10, 13}];

u = Transpose[SingularValues[partialexternalmatrix1][[1]]];
gsvdcorrelation12 =
  Table[
    Sqrt[
      Sum[(Dot[Transpose[partialexternalmatrix2][[a]], u]^2)[[b]], {b, 1, 9}] /
      Dot[Transpose[partialexternalmatrix2][[a]], Transpose[partialexternalmatrix2][[a]]],
      {a, 1, 4}];
  Sort[gsvdcorrelation12, OrderedQ[{{#2}, {#1}}] &][[1]]

0.708433

limit = 0.75;

gridx = Table[a, {a, 0, limit, limit/5.}];
framex = gridx;
sizes = Flatten[
  Table[
    Dimensions[
      Characters[
        ToString[framex[[a]]
      ]], {a, 1, 6}];
Do[
  Do[framex[[a]] = StringJoin[ToString[framex[[a]]], " "],
  {b, 1, size - sizes[[a]]},
  {a, 1, 6}];
framex = Table[{gridx[[a]], framex[[a]]}, {a, 1, 6}];
gridx = Table[{gridx[[a]], RGBColor[0, 0, 0]}, {a, 1, 6}];
framey = Table[{13 - a + 1, externalarraynames[[1, a]]}, {a, 10, 13}];
labelx = "(b) GSVD Correlation";
labely = " ";
g = BarChart[
  Table[gsvdcorrelation12[[4 - a]], {a, 0, 4 - 1}],
  BarOrientation -> Horizontal,
  PlotRange -> {{0, limit + 0.001}, {0.5, 4 + 0.5}},
  AspectRatio -> 1,
  Axes -> False,
  Frame -> True,
  FrameTicks -> {None, framey, framex, None},
  FrameLabel -> {None, labely, labelx, None},
  GridLines -> {gridx, None},
  DisplayFunction -> Identity];
g = FullGraphics[g];
g[[1, 2]] = g[[1, 2]] /.
  Text[labely, {b_, c_}, {1., 0.}] ->
  Text[labely, {b - 0.2, c}, {0, 0}, {0, 1}];
g[[1, 2]] = g[[1, 2]] /.
  Text[labelx, {b_, c_}, {0., -1.}] ->
  Text[labelx, {b, c + 0.88}, {0, -1}, {1, 0}];
g[[1, 2]] = g[[1, 2]] /.
  Text[a_, {b_, c_}, {0., -1.}] ->
  Text[a, {b, c + 0.44}, {0, 0}, {0, 1}];
q6 = Show[g,
  AspectRatio -> 1.05,
  PlotRange -> All,
  DisplayFunction -> Identity];
```



```
(* Display GSVD Pseudoinverse Correlations *)
```

```
(* Create GSVD Correlations Red and Green Raster Display *)
```

```
contrast = 0.5;
displaying = Table[
  If[contrast * arraycontributions[[i, j]] > 0,
    If[contrast * arraycontributions[[i, j]] < 1,
      {contrast * arraycontributions[[i, j]], 0}, {1, 0}],
    If[contrast * arraycontributions[[i, j]] > -1,
      {0, -contrast * arraycontributions[[i, j]]}, {0, 1}]],
  {i, 1, 6}, {j, 1, externalarrays}];
framex = Table[{a - 0.5, externalarraynames[[1, a]]}, {a, 1, externalarrays}];
framey = {{0.5, "16"}, {1.5, "15"}, {2.5, "14"}, {3.5, "5"}, {4.5, "4"}, {5.5, "3"}};
labely = ColumnForm[{"(c) Arraylets"}, Center];
labelx = ColumnForm[{"Samples"}, Center];
g = Show[
  Graphics[
    RasterArray[
      Table[
        RGBColor[displaying[[i, j, 1]], displaying[[i, j, 2]], 0],
        {i, 6, 1, -1}, {j, 1, externalarrays}]]],
  AspectRatio -> 1,
  Frame -> True,
  FrameTicks -> {None, framey, framex, None},
  FrameLabel -> {None, labely, labelx, None},
  DisplayFunction -> Identity];
g = FullGraphics[g];
g[[1, 2]] = g[[1, 2]] /.
  Text[labely, {b_, c_}, {1., 0.}] ->
  Text[labely, {b - 2.5, c}, {0, 0}, {0, 1}];
g[[1, 2]] = g[[1, 2]] /.
  Text[labelx, {b_, c_}, {0., -1.}] ->
  Text[labelx, {b, c + 2}, {0, -1}, {1, 0}];
g[[1, 2]] = g[[1, 2]] /.
  Text[a_, {b_, c_}, {0., -1.}] ->
  Text[a, {b, c + 1}, {0, 0}, {0, 1}];
f3 = Show[g,
  PlotRange -> All,
  AspectRatio -> 1 / GoldenRatio,
  DisplayFunction -> Identity];
```

```
(* Create GSVD Correlations Graph Display *)
```

```
p = Table[0, {a, 1, 6}];  
color = {  
  RGBColor[0, 0.5, 0],  
  RGBColor[1, 0, 0],  
  RGBColor[0, 0, 1]  
};  
framex = Table[{a - 1, "  "}, {a, 1, externalarrays}];  
  
matrixplot = {  
  Sqrt[Dot[  
    arraycontributions[[1]],  
    arraycontributions[[1]]]] /  
    2 * Sin[Pi * (x + 1) / 4],  
  -Sqrt[Dot[  
    arraycontributions[[2]],  
    arraycontributions[[2]]]] /  
    2 * Sin[Pi * (x + 1) / 4],  
  Sqrt[Dot[  
    arraycontributions[[3]],  
    arraycontributions[[3]]]] /  
    2 * Cos[Pi * x / 4],  
  -Sqrt[Dot[  
    arraycontributions[[4]],  
    arraycontributions[[4]]]] /  
    2 * Cos[Pi * (x - 1) / 4],  
  -Sqrt[Dot[  
    arraycontributions[[5]],  
    arraycontributions[[5]]]] /  
    2 * Sin[Pi * (x + 2) / 4],  
  Sqrt[Dot[  
    arraycontributions[[6]],  
    arraycontributions[[6]]]] /  
    2 * Cos[Pi * x / 4];  
}
```

```

labelx = " ";
labely = ColumnForm[{"(d) Correlation"}, Center];
framey = Table[a, {a, -5, 5, 5}];
Do[{
  graph = Plot[matrixplot[[n]],
    {x, 0, 8},
    PlotStyle -> {color[[Mod[n, 3] + 1]], Dashing[{0.03, 0.02}]},
    DisplayFunction -> Identity],
  coordinates = Table[{a - 1,
    arraycontributions[[n, a]],
    {a, 1, externalarrays}},
  points = Table[Point[coordinates[[a]]], {a, 1, externalarrays}],
  line = Line[coordinates],
  g = Show[
    {Graphics[{color[[Mod[n, 3] + 1]], PointSize[0.022], points}],
    Graphics[{color[[Mod[n, 3] + 1]], line}],
    graph],
  Frame -> True,
  FrameLabel -> {None, labely, labelx, None},
  GridLines -> {{{8.5, RGBColor[0, 0, 0]}}, {{0, RGBColor[0, 0, 0]}}},
  FrameTicks -> {None, framey, framex, None},
  PlotRange -> {-7.5, 5.01},
  DisplayFunction -> Identity],
  g = FullGraphics[g],
  g[[1, 2]] = g[[1, 2]] /.
  Text[labely, {b_, c_}, {1., 0.}] ->
  Text[labely, {b - 2.3, c}, {0, 0}, {0, 1}],
  g[[1, 2]] = g[[1, 2]] /.
  Text[labelx, {b_, c_}, {0., -1.}] ->
  Text[labelx, {b, c + 2.5}, {0, -1}, {1, 0}],
  g[[1, 2]] = g[[1, 2]] /.
  Text[a_, {b_, c_}, {0., -1.}] ->
  Text[a, {b, c + 1.25}, {0, 0}, {0, 1}],
  p[[n]] = Show[g,
    PlotRange -> All,
    AspectRatio -> 1 / GoldenRatio,
    DisplayFunction -> Identity]
}, {n, 1, 3}];
f4 = Show[Table[p[[a]], {a, 1, 3}],
  DisplayFunction -> Identity];

```

```

labelx = " ";
labely = ColumnForm[{"(e) Correlation"}, Center];
framey = Table[a, {a, -2.5, 2.5, 2.5}];
Do[{
  graph = Plot[matrixplot[[n]],
    {x, 0, 8},
    PlotStyle -> {color[[Mod[n, 3] + 1]], Dashing[{0.03, 0.02}]},
    DisplayFunction -> Identity],
  coordinates = Table[{a - 1,
    arraycontributions[[n, a]],
    {a, 1, externalarrays}},
  points = Table[Point[coordinates[[a]]], {a, 1, externalarrays}],
  line = Line[coordinates],
  g = Show[
    {Graphics[{color[[Mod[n, 3] + 1]], PointSize[0.022], points}],
    Graphics[{color[[Mod[n, 3] + 1]], line}],
    graph],
  Frame -> True,
  FrameLabel -> {None, labely, labelx, None},
  GridLines -> {{{8.5, RGBColor[0, 0, 0]}}, {{0, RGBColor[0, 0, 0]}}},
  FrameTicks -> {None, framey, framex, None},
  PlotRange -> {-2.5, 3.5},
  DisplayFunction -> Identity],
  g = FullGraphics[g],
  g[[1, 2]] = g[[1, 2]] /.
  Text[labely, {b_, c_}, {1., 0.}] ->
  Text[labely, {b - 2.3, c}, {0, 0}, {0, 1}],
  g[[1, 2]] = g[[1, 2]] /.
  Text[labelx, {b_, c_}, {0., -1.}] ->
  Text[labelx, {b, c + 1.2}, {0, -1}, {1, 0}],
  g[[1, 2]] = g[[1, 2]] /.
  Text[a_, {b_, c_}, {0., -1.}] ->
  Text[a, {b, c + 0.6}, {0, 0}, {0, 1}],
  p[[n]] = Show[g,
    PlotRange -> All,
    AspectRatio -> 1 / GoldenRatio,
    DisplayFunction -> Identity]
}, {n, 4, 6}];
f5 = Show[Table[p[[a]], {a, 4, 6}],
  DisplayFunction -> Identity];

```

```
(* Display GSVD Pseudoinverse Correlations
Between Replication Initiation Proteins and Transcription Factors *)
```

```
(* Create GSVD Correlations Red and Green Raster Display *)
```

```
contrast = 50;
displaying = Table[
  If[contrast * arraycontributions12[[i, j]] > 0,
    If[contrast * arraycontributions12[[i, j]] < 1,
      {contrast * arraycontributions12[[i, j]], 0}, {1, 0}],
    If[contrast * arraycontributions12[[i, j]] > -1,
      {0, -contrast * arraycontributions12[[i, j]]}, {0, 1}]],
  {i, 1, 4}, {j, 1, 9}];
framex = Table[{a - 0.5, externalarraynames[[1, a]]}, {a, 1, 9}];
framey = Table[{13 - a + 0.5, externalarraynames[[1, a]]}, {a, 10, 13}];
labely = ColumnForm[{"(d) Samples"}, Center];
labelx = ColumnForm[{"Samples"}, Center];
g = Show[
  Graphics[
    RasterArray[
      Table[
        RGBColor[displaying[[i, j, 1]], displaying[[i, j, 2]], 0],
        {i, 4, 1, -1}, {j, 1, 9}]]],
  AspectRatio -> 1,
  Frame -> True,
  FrameTicks -> {None, framey, framex, None},
  FrameLabel -> {None, labely, labelx, None},
  DisplayFunction -> Identity];
g = FullGraphics[g];
g[[1, 2]] = g[[1, 2]] /.
  Text[labely, {b_, c_}, {1., 0.}] ->
  Text[labely, {b - 1.73, c}, {0, 0}, {0, 1}];
g[[1, 2]] = g[[1, 2]] /.
  Text[labelx, {b_, c_}, {0., -1.}] ->
  Text[labelx, {b, c + 1.34}, {0, -1}, {1, 0}];
g[[1, 2]] = g[[1, 2]] /.
  Text[a_, {b_, c_}, {0., -1.}] ->
  Text[a, {b, c + 0.67}, {0, 0}, {0, 1}];
h4 = Show[g,
  AspectRatio -> 1 / GoldenRatio,
  PlotRange -> All,
  DisplayFunction -> Identity];
```

```
(* Create GSVD Correlations Graph Display *)
```

```
p = Table[0, {a, 1, 4}];  
color = {  
  RGBColor[0, 0, 1],  
  RGBColor[1, 0, 0]  
};  
framex = Table[{a - 1, "  "}, {a, 1, 9}];  
  
matrixplot = {  
  -Sqrt[Dot[  
    arraycontributions12[[1]],  
    arraycontributions12[[1]]]] /  
    2 * Sin[Pi * x / 4],  
  -Sqrt[Dot[  
    arraycontributions12[[2]],  
    arraycontributions12[[2]]]] /  
    2 * Sin[Pi * x / 4],  
  -Sqrt[Dot[  
    arraycontributions12[[3]],  
    arraycontributions12[[3]]]] /  
    2 * Sin[Pi * x / 4],  
  -Sqrt[Dot[  
    arraycontributions12[[4]],  
    arraycontributions12[[4]]]] /  
    2 * Sin[Pi * x / 4];
```

```

labelx = " ";
labely = ColumnForm[{"(e) Correlation"}, Center];
framey = Table[a, {a, -0.025, 0.025, 0.025}];
Do[{
  graph = Plot[matrixplot[[n]],
    {x, 0, 8},
    PlotStyle -> {color[Mod[n, 2] + 1], Dashing[{0.03, 0.02}]},
    DisplayFunction -> Identity],
  coordinates = Table[{a - 1,
    arraycontributions12[[n, a]]},
    {a, 1, 9}],
  points = Table[Point[coordinates[[a]]], {a, 1, 9}],
  line = Line[coordinates],
  g = Show[
    {Graphics[{color[Mod[n, 2] + 1], PointSize[0.022], points}],
    Graphics[{color[Mod[n, 2] + 1], line}],
    graph},
  Frame -> True,
  FrameLabel -> {None, labely, labelx, None},
  FrameTicks -> {None, framey, framex, None},
  GridLines -> {None, {{0, RGBColor[0, 0, 0]}}},
  PlotRange -> {-0.035, 0.035},
  DisplayFunction -> Identity],
g = FullGraphics[g],
g[[1, 2]] = g[[1, 2]] /.
  Text[labely, {b_, c_}, {1., 0.}] ->
  Text[labely, {b - 1.5, c}, {0, 0}, {0, 1}],
g[[1, 2]] = g[[1, 2]] /.
  Text[labelx, {b_, c_}, {0., -1.}] ->
  Text[labelx, {b, c + 0.0233}, {0, -1}, {1, 0}],
g[[1, 2]] = g[[1, 2]] /.
  Text[a_, {b_, c_}, {0., -1.}] ->
  Text[a, {b, c + 0.0116}, {0, 0}, {0, 1}],
p[[n]] = Show[g,
  AspectRatio -> 1 / GoldenRatio,
  PlotRange -> All,
  DisplayFunction -> Identity],
}, {n, 1, 2}];
h5 = Show[Table[p[[a]], {a, 1, 2}]];

```

```

labelx = " ";
labely = ColumnForm[{"(f) Correlation"}, Center];
framey = Table[a, {a, -0.05, 0.05, 0.05}];
Do[{
  graph = Plot[matrixplot[[n]],
    {x, 0, 8},
    PlotStyle -> {color[Mod[n, 2] + 1], Dashing[{0.03, 0.02}]},
    DisplayFunction -> Identity],
  coordinates = Table[{a - 1,
    arraycontributions12[[n, a]]},
    {a, 1, 9}],
  points = Table[Point[coordinates[[a]]], {a, 1, 9}],
  line = Line[coordinates],
  g = Show[
    {Graphics[{color[Mod[n, 2] + 1], PointSize[0.022], points}],
    Graphics[{color[Mod[n, 2] + 1], line}],
    graph},
  Frame -> True,
  FrameLabel -> {None, labely, labelx, None},
  FrameTicks -> {None, framey, framex, None},
  GridLines -> {None, {{0, RGBColor[0, 0, 0]}}},
  PlotRange -> {-0.055, 0.055},
  DisplayFunction -> Identity],
g = FullGraphics[g],
g[[1, 2]] = g[[1, 2]] /.
  Text[labely, {b_, c_}, {1., 0.}] ->
  Text[labely, {b - 1.5, c}, {0, 0}, {0, 1}],
g[[1, 2]] = g[[1, 2]] /.
  Text[labelx, {b_, c_}, {0., -1.}] ->
  Text[labelx, {b, c + 0.0367}, {0, -1}, {1, 0}],
g[[1, 2]] = g[[1, 2]] /.
  Text[a_, {b_, c_}, {0., -1.}] ->
  Text[a, {b, c + 0.0183}, {0, 0}, {0, 1}],
p[[n]] = Show[g,
  AspectRatio -> 1 / GoldenRatio,
  PlotRange -> All,
  DisplayFunction -> Identity],
}, {n, 3, 4}];
h6 = Show[Table[p[[a]], {a, 3, 4}]];

```



```
(* SVD Sort External Arrays *)
```

```
genes = genes2;
genenames = TakeColumns[genenames2, 1];
arrays = arrays2;
arraynames = arraynames2;

externalgenenames = TakeColumns[externalgenenames, 1];
list = Flatten[Intersection[genenames, externalgenenames]];
{partialgenes} = Dimensions[list]

{2227}

counter = Table[{Position[genenames, list[[a]]][[1, 1]], list[[a]]}, {a, 1, partialgenes}];
counter = ReplaceAll[counter, {} -> {Null}];
counter = Sort[counter, OrderedQ[{{#1, #2}} &];
list = Flatten[TakeColumns[counter, {2}]];

counter = Table[Flatten[Position[list, genenames[[a, 1]]], {a, 1, genes}];
counter = ReplaceAll[counter, {} -> {Null}];
partialeigenarrays = AppendRows[counter, svdphases, genenames, eigenarrays];
partialeigenarrays = Sort[partialeigenarrays, OrderedQ[{{#1, #2}} &];
partialphases = TakeRows [
  TakeColumns[partialeigenarrays, {2, 2}],
  {1, partialgenes}];
partialgenenames = TakeRows [
  TakeColumns[partialeigenarrays, {3, 3}],
  {1, partialgenes}];
partialeigenarrays = TakeRows [
  TakeColumns[partialeigenarrays, {4, arrays + 3}],
  {1, partialgenes}];
partialeigenarrays = TakeColumns[partialeigenarrays, {1, 9}];

counter = Table[Flatten[Position[list, externalgenenames[[a, 1]]], {a, 1, externalgenes}];
counter = ReplaceAll[counter, {} -> {Null}];
partialexternalmatrix = AppendRows[counter, externalgenenames, externalmatrix];
partialexternalmatrix = Sort[partialexternalmatrix, OrderedQ[{{#1, #2}} &];
partialexternalgenenames = TakeRows [
  TakeColumns[partialexternalmatrix, {2, 2}],
  {1, partialgenes}];
partialexternalmatrix = TakeRows [
  TakeColumns[partialexternalmatrix, {3, externalarrays + 2}],
  {1, partialgenes}];
```

```
(* Center Gene Data *)
```

```
average = Table[1, {a, 1, externalarrays}];
average = N[average / Sqrt[Dot[average, average]]];
partialexternalmatrix =
  partialexternalmatrix - N[Outer[Times, Dot[partialexternalmatrix, average], average]];
```

```
(* Center Array Data *)
```

```
partialexternalmatrix = Transpose[partialexternalmatrix];
average = Table[1, {a, 1, partialgenes}];
average = N[average / Sqrt[Dot[average, average]]];
partialexternalmatrix =
  partialexternalmatrix - N[Outer[Times, Dot[partialexternalmatrix, average], average]];
partialexternalmatrix = Transpose[partialexternalmatrix];
```

(\* Create SVD Basis External Array Correlations Bar Chart Display \*)

```
u = Transpose[SingularValues[partialeigenarrays][[1]]];
svdcorrelation =
  Table[
    Sqrt[
      Sum[(Dot[Transpose[partialexternalmatrix][[a]], u]^2)[[b]], {b, 1, 9}] /
      Dot[Transpose[partialexternalmatrix][[a]], Transpose[partialexternalmatrix][[a]]],
      {a, 1, externalarrays}];
Sort[svdcorrelation, OrderedQ[{{#2}, {#1}}] &][[1]]

0.340345

limit = 0.35;

gridx = Table[a, {a, 0, limit, limit/5.}];
framex = gridx;
sizes = Flatten[
  Table[
    Dimensions[
      Characters[
        ToString[framex[[a]]
      ]], {a, 1, 6}]];
Do[
  Do[framex[[a]] = StringJoin[ToString[framex[[a]]], " "],
  {b, 1, size - sizes[[a]]},
  {a, 1, 6}];
framex = Table[{gridx[[a]], framex[[a]]}, {a, 1, 6}];
gridx = Table[{gridx[[a]], RGBColor[0, 0, 0]}, {a, 1, 6}];
framey = Table[{13 - a + 1, externalarraynames[[1, a]]}, {a, 1, 13}];
labelx = "(a) SVD Basis Correlation";
labely = "Samples";
g = BarChart[
  Table[svdcorrelation[[externalarrays - a]], {a, 0, externalarrays - 1}],
  BarOrientation -> Horizontal,
  PlotRange -> {{0, limit + 0.001}, {0.5, externalarrays + 0.5}},
  AspectRatio -> 1,
  Axes -> False,
  Frame -> True,
  FrameTicks -> {None, framey, framex, None},
  FrameLabel -> {None, labely, labelx, None},
  GridLines -> {gridx, None},
  DisplayFunction -> Identity];
g = FullGraphics[g];
g[[1, 2]] = g[[1, 2]] /.
  Text[labely, {b_, c_}, {1., 0.}] ->
  Text[labely, {b - 0.09, c}, {0, 0}, {0, 1}];
g[[1, 2]] = g[[1, 2]] /.
  Text[labelx, {b_, c_}, {0., -1.}] ->
  Text[labelx, {b, c + 3}, {0, -1}, {1, 0}];
g[[1, 2]] = g[[1, 2]] /.
  Text[a_, {b_, c_}, {0., -1.}] ->
  Text[a, {b, c + 1.5}, {0, 0}, {0, 1}];
q3 = Show[g,
  AspectRatio -> 1.05,
  PlotRange -> All,
  DisplayFunction -> Identity];
```

(\* Create SVD Transcription Factor Basis Replication Initiation Protein Sample  
Correlations Bar Chart Display \*)

```

u = Transpose[SingularValues[partialexternalmatrix1][[1]]];
svdcorrelation12 =
  Table[
    Sqrt[
      Sum[(Dot[Transpose[partialexternalmatrix2][[a]], u]^2)[[b]], {b, 1, 9}] /
      Dot[Transpose[partialexternalmatrix2][[a]], Transpose[partialexternalmatrix2][[a]]],
      {a, 1, 4}];
Sort[svdcorrelation12, OrderedQ[{{#2}, {#1}}] &][[1]]

0.738166

limit = 0.75;

gridx = Table[a, {a, 0, limit, limit/5.}];
framex = gridx;
sizes = Flatten[
  Table[
    Dimensions[
      Characters[
        ToString[framex[[a]]
      ]], {a, 1, 6}];
Do[
  Do[framex[[a]] = StringJoin[ToString[framex[[a]]], " "],
  {b, 1, size - sizes[[a]]}],
  {a, 1, 6}];
framex = Table[{gridx[[a]], framex[[a]]}, {a, 1, 6}];
gridx = Table[{gridx[[a]], RGBColor[0, 0, 0]}, {a, 1, 6}];
framey = Table[{13 - a + 1, externalarraynames[[1, a]]}, {a, 10, 13}];
labelx = "(a) SVD Basis Correlation";
labely = "Samples";
g = BarChart[
  Table[svdcorrelation12[[4 - a]], {a, 0, 4 - 1}],
  BarOrientation -> Horizontal,
  PlotRange -> {{0, limit + 0.001}, {0.5, 4 + 0.5}},
  AspectRatio -> 1,
  Axes -> False,
  Frame -> True,
  FrameTicks -> {None, framey, framex, None},
  FrameLabel -> {None, labely, labelx, None},
  GridLines -> {gridx, None},
  DisplayFunction -> Identity];
g = FullGraphics[g];
g[[1, 2]] = g[[1, 2]] /.
  Text[labely, {b_, c_}, {1., 0.}] ->
  Text[labely, {b - 0.2, c}, {0, 0}, {0, 1}];
g[[1, 2]] = g[[1, 2]] /.
  Text[labelx, {b_, c_}, {0., -1.}] ->
  Text[labelx, {b, c + 0.88}, {0, -1}, {1, 0}];
g[[1, 2]] = g[[1, 2]] /.
  Text[a_, {b_, c_}, {0., -1.}] ->
  Text[a, {b, c + 0.44}, {0, 0}, {0, 1}];
q5 = Show[g,
  AspectRatio -> 1.05,
  PlotRange -> All,
  DisplayFunction -> Identity];

```

(\* Project Data Onto SVD Basis \*)

```
externalarraycorrelations = Dot[PseudoInverse[partialeigenarrays], partialexternalmatrix];  
matrix = Dot[partialeigenarrays, externalarraycorrelations];
```

(\* Project SVD Reconstructed Replication Initiation Protein Data Onto  
SVD Reconstructed Transcription Factor Data \*)

```
partialexternalmatrix1 = TakeColumns[partialexternalmatrix, {1, 9}];  
partialexternalmatrix2 = TakeColumns[partialexternalmatrix, {10, 13}];  
arraycontributions12 = Transpose[Dot[  
  Dot[PseudoInverse[partialexternalmatrix1], partialeigenarrays],  
  Dot[PseudoInverse[partialeigenarrays], partialexternalmatrix2]]];
```

(\* Calculate Contributions of Eigenarrays to External Arrays \*)

```
matrix = Transpose[matrix];  
externalcoordinates = Table[  
  {externalarraycorrelations[[1, a]] /  
    Sqrt[Dot[matrix[[a]], matrix[[a]]]],  
    externalarraycorrelations[[2, a]] /  
    Sqrt[Dot[matrix[[a]], matrix[[a]]]]},  
  {a, 1, externalarrays}];  
matrix = Transpose[matrix];
```

(\* Create Parameter Graph of Arrays Projected Onto 2 D Subspace \*)

```
points1 = {Point[externalcoordinates[[1]], Point[externalcoordinates[[2]]],  
  Point[externalcoordinates[[3]]]};  
points2 = {Point[externalcoordinates[[4]]];  
points3 = {Point[externalcoordinates[[5]], Point[externalcoordinates[[6]]],  
  Point[externalcoordinates[[7]]]};  
points4 = {Point[externalcoordinates[[8]], Point[externalcoordinates[[9]]]};  
points5 = {Point[externalcoordinates[[10]], Point[externalcoordinates[[11]]],  
  Point[externalcoordinates[[12]]], Point[externalcoordinates[[13]]]};
```

```

p = Show[
  {Graphics[{RGBColor[0, 0.5, 0], PointSize[0.035], points1}},
  Graphics[{RGBColor[1, 0, 0], PointSize[0.035], points2}},
  Graphics[{RGBColor[1, 0.5, 0], PointSize[0.035], points3}},
  Graphics[{RGBColor[1, 1, 0], PointSize[0.035], points4}},
  Graphics[{RGBColor[0.75, 0, 1], PointSize[0.035], points5}},
  Graphics[{RGBColor[1, 0.5, 0], Text["G2/M", {1.075, -0.52}]}],
  Graphics[{RGBColor[0, 0, 0], Text["M/G1", {0.9, 0.75}]}],
  Graphics[{RGBColor[1, 0, 0], Text["S/G2", {0.2, -1.12}]}],
  Graphics[{RGBColor[0, 0, 1], Text["S", {-0.95, -0.6}]}],
  Graphics[{RGBColor[0, 0.5, 0], Text["G1", {-0.8, 0.8}]}],
  Graphics[{RGBColor[0, 0, 0], Text["(a)", {-1.1, 1.15}]}],
  Graphics[{RGBColor[0, 0, 0], Text[" $\phi=\pi/2$ ", {0.2, 1.12}]}],
  Graphics[{RGBColor[0, 0, 0], Text[" $\phi=0$ ", {1.12, 0.12}]}],
  Graphics[{RGBColor[0, 0, 0], Text["MBP1", externalcoordinates[[1]] - {0.2, 0}]}],
  Graphics[{RGBColor[0, 0, 0], Text["SWI4", externalcoordinates[[2]] - {0.15, 0.09}]}],
  Graphics[{RGBColor[0, 0, 0], Text["SWI6", externalcoordinates[[3]] - {0.1, 0.1}]}],
  Graphics[{RGBColor[0, 0, 0], Text["FKH1", externalcoordinates[[4]] - {0.2, 0}]}],
  Graphics[{RGBColor[0, 0, 0], Text["FKH2", externalcoordinates[[5]] + {0, 0.15}]}],
  Graphics[{RGBColor[0, 0, 0], Text["NDD1", externalcoordinates[[6]] - {0.24, 0}]}],
  Graphics[{RGBColor[0, 0, 0], Text["MCM1", externalcoordinates[[7]] + {-0.04, 0.15}]}],
  Graphics[{RGBColor[0, 0, 0], Text["ACE2", externalcoordinates[[8]] + {0.02, 0.12}]}],
  Graphics[{RGBColor[0, 0, 0], Text["SWI5", externalcoordinates[[9]] + {0, 0.15}]}],
  Graphics[{RGBColor[0, 0, 0], Text["MCM3", externalcoordinates[[10]] - {0.2, 0}]}],
  Graphics[{RGBColor[0, 0, 0], Text["MCM4", externalcoordinates[[11]] + {-0.24, 0.06}]}],
  Graphics[{RGBColor[0, 0, 0], Text["MCM7", externalcoordinates[[12]] - {0, 0.15}]}],
  Graphics[{RGBColor[0, 0, 0], Text["ORC1", externalcoordinates[[13]] + {0.2, 0}]}],
  Graphics[{RGBColor[0, 0, 0], Dashing[{0.03, 0.02}], Circle[{0, 0}, 0.5, {0.*Pi, 2*Pi}]}],
  Graphics[{RGBColor[0, 0, 0], Dashing[{0.03, 0.02}], Circle[{0, 0}, 1]}],
  Graphics[{RGBColor[0, 0, 0], Arrow[{-1.25, 0}, {1.25, 0},
    HeadCenter -> 0.5, HeadLength -> 0.035, HeadWidth -> 0.75]}],
  Graphics[{RGBColor[0, 0, 0], Arrow[{0, -1.25}, {0, 1.25},
    HeadCenter -> 0.5, HeadLength -> 0.035, HeadWidth -> 0.75]}]}],
AspectRatio -> 1,
PlotRange -> {{-1.25, 1.25}, {-1.25, 1.25}},
Frame -> True,
FrameTicks -> False,
FrameLabel -> {None, None, None, None},
GridLines -> {{{0, RGBColor[0, 0, 0]}}, {{0, RGBColor[0, 0, 0]}},
DisplayFunction -> Identity];
p = FullGraphics[p];
p[[1, 2]] = p[[1, 2]] /.
  Text[labely, {b_, c_}, {1., 0.}] ->
  Text[labely, {-1.18, 0}, {0, 0}, {0, 1}];
m1 = Show[p,
  AspectRatio -> 1.,
  PlotRange -> All,
  DisplayFunction -> Identity];

```

(\* Classify SVD Gene Phases into Cell Cycle Phases \*)

```
ph1 = 0;  
ph2 = -1 / 2.;  
ph3 = -1.;  
ph4 = -4 / 3.;  
ph5 = -5 / 3.;
```

```
endph5 = partialgenes;  
beginph1 = 1;  
partialphases[[endph5]] - ph1  
partialphases[[beginph1]] - ph1
```

```
{0.000221307}
```

```
{-0.000407097}
```

```
endph1 = 470;  
beginph2 = 471;  
partialphases[[endph1]] - ph2  
partialphases[[beginph2]] - ph2
```

```
{0.000187677}
```

```
{0.998634}
```

```
endph2 = 913;  
beginph3 = 914;  
partialphases[[endph2]] - ph3  
partialphases[[beginph3]] - ph3
```

```
{1.00122}
```

```
{0.998991}
```

```
endph3 = 1261;  
beginph4 = 1262;  
partialphases[[endph3]] - ph4  
partialphases[[beginph4]] - ph4
```

```
{1.00001}
```

```
{0.999004}
```

```
endph4 = 1798;  
beginph5 = 1799;  
partialphases[[endph4]] - ph5  
partialphases[[beginph5]] - ph5
```

```
{2.00349}
```

```
{1.99843}
```

(\* 2227 yeast genes, 470 in M/G1, 443 in G1, 348 in S, 537 in S/G2, 429 in G2/M. \*)

```
(* Display SVD Reconstructed and Sorted External Data *)
```

```
(* Create SVD Reconstructed Sorted External Data 2D Red & Green Raster Display *)
```

```
contrast = 10 * 1.5;
displaying = Table[
  If[contrast * matrix[[i, j]] > 0,
    If[contrast * matrix[[i, j]] < 1,
      {contrast * matrix[[i, j]], 0}, {1, 0}],
    If[contrast * matrix[[i, j]] > -1,
      {0, -contrast * matrix[[i, j]]}, {0, 1}]],
  {i, 1, partialgenes}, {j, 1, externalarrays}];
framex = Table[{a - 0.5, externalarraynames[[1, a]]}, {a, 1, externalarrays}];
framey = {
  {partialgenes - endph1 / 2, "M/G1"},
  {partialgenes - (endph1 + endph2) / 2, "G1"},
  {partialgenes - (endph2 + endph3) / 2, "S"},
  {partialgenes - (endph3 + endph4) / 2, "S/G2"},
  {partialgenes - endph4 / 2, "G2/M"}];
gridy = {
  {partialgenes - endph1 + 0.5, {RGBColor[0, 0, 0]}},
  {partialgenes - endph2 + 0.5, {RGBColor[0, 0, 0]}},
  {partialgenes - endph3 + 0.5, {RGBColor[0, 0, 0]}},
  {partialgenes - endph4 + 0.5, {RGBColor[0, 0, 0]}}];
labelx = "(a) Samples";
labely = ColumnForm[{"ORFs", " ", " ", " ", " ", " ", " ", " "}, Center];
g = Show[
  Graphics[
    RasterArray[
      Table[
        RGBColor[displaying[[i, j, 1]], displaying[[i, j, 2]], 0],
        {i, partialgenes, 1, -1}, {j, 1, externalarrays}]]],
  AspectRatio -> 1,
  Frame -> True,
  FrameTicks -> {None, framey, framex, None},
  FrameLabel -> {None, labely, labelx, None},
  GridLines -> {None, gridy},
  DisplayFunction -> Identity];
```

```

g = FullGraphics[g];
g[[1, 2]] = g[[1, 2]] /.
  Text[labely, {b_, c_}, {1., 0.}] →
  Text[labely, {b, c}, {0, 0}, {0, 1}];
g[[1, 2]] = g[[1, 2]] /.
  Text[a_, {b_, c_}, {1., 0.}] →
  Text[a, {b - 1.5, c}, {0, 0}, {0, 1}];
g[[1, 2]] = g[[1, 2]] /.
  Text[labelx, {b_, c_}, {0., -1.}] →
  Text[labelx, {b, c + 340}, {0, -1}, {1, 0}];
g[[1, 2]] = g[[1, 2]] /.
  Text[a_, {b_, c_}, {0., -1.}] →
  Text[a, {b, c + 150}, {0, 0}, {0, 1}];
g1 = Show[g,
  AspectRatio -> GoldenRatio * 1.2,
  PlotRange -> All,
  DisplayFunction -> Identity];

(* Create SVD Reconstructed Sorted External Data Graph Display *)

matrix = Transpose[matrix];
matrixplot = Table[0, {a, 1, externalarrays}];
Do[
  matrixplot[[a]] = Chop[TrigFit[matrix[[a]], 1, {x, partialgenes - 1}], 0.01],
  {a, 1, externalarrays}]
table = Table[
  {externalarraynames[[1, a]], matrixplot[[a]]}, {a, 1, externalarrays}];
TableForm[table]

MBP1      -0.0428963 Cos[ $\frac{\pi x}{1113}$ ] + 0.0465378 Sin[ $\frac{\pi x}{1113}$ ]
SWI4      -0.0898583 Cos[ $\frac{\pi x}{1113}$ ] + 0.0611395 Sin[ $\frac{\pi x}{1113}$ ]
SWI6      -0.0762082 Cos[ $\frac{\pi x}{1113}$ ] + 0.0682877 Sin[ $\frac{\pi x}{1113}$ ]
FKH1      -0.0151408 Cos[ $\frac{\pi x}{1113}$ ] - 0.0256583 Sin[ $\frac{\pi x}{1113}$ ]
FKH2      -0.0112308 Cos[ $\frac{\pi x}{1113}$ ] - 0.0109385 Sin[ $\frac{\pi x}{1113}$ ]
NDD1      0.0290329 Cos[ $\frac{\pi x}{1113}$ ] - 0.0294006 Sin[ $\frac{\pi x}{1113}$ ]
MCM1      0.0547816 Cos[ $\frac{\pi x}{1113}$ ] - 0.0212513 Sin[ $\frac{\pi x}{1113}$ ]
ACE2      -0.0139835 Cos[ $\frac{\pi x}{1113}$ ] + 0.0259147 Sin[ $\frac{\pi x}{1113}$ ]
SWI5      -0.0111965 + 0.0308045 Sin[ $\frac{\pi x}{1113}$ ]
MCM3      0.014907 + 0.038586 Cos[ $\frac{\pi x}{1113}$ ] - 0.0301169 Sin[ $\frac{\pi x}{1113}$ ]
MCM4      0.0555616 Cos[ $\frac{\pi x}{1113}$ ] - 0.0223721 Sin[ $\frac{\pi x}{1113}$ ]
MCM7      0.0269092 Cos[ $\frac{\pi x}{1113}$ ] - 0.0386775 Sin[ $\frac{\pi x}{1113}$ ]
ORC1      0.0135928 + 0.043864 Cos[ $\frac{\pi x}{1113}$ ] - 0.0542691 Sin[ $\frac{\pi x}{1113}$ ]

p = Table[0, {a, 1, externalarrays}];
color = {
  RGBColor[0.75, 0, 1],
  RGBColor[1, 0, 0],
  RGBColor[1, 0.5, 0],
  RGBColor[0, 0.5, 0],
  RGBColor[0, 0, 1]};
labelx = "(b) Binding Level";
framex = Table[{0.2 * a, externalarraynames[[1, a]]},
  {a, 1, externalarrays}];

```



```

Do[{
  graph = ParametricPlot[{matrixplot[[n]] + 0.2 * n, -x},
    {x, 0, partialgenes - 1},
    PlotStyle -> {RGBColor[0, 0, 0]},
    DisplayFunction -> Identity],
  coordinates = Table[
    If[matrix[[n, a]] + 0.2 * n < 0, 0,
      If[matrix[[n, a]] + 0.2 * n > 2.8, 2.8,
        matrix[[n, a]] + 0.2 * n]],
    {a, 1, partialgenes}],
  coordinates = Table[{coordinates[[a]], -a + 1}, {a, 1, partialgenes}],
  line = Line[coordinates],
  g = Show[{
    Graphics[{color[[Mod[n, 5] + 1]], line}],
    graph},
  Frame -> True,
  FrameLabel -> {None, None, labelx, None},
  FrameTicks -> {None, None, framex, None},
  GridLines -> {{{0.2 * n, RGBColor[0, 0, 0]}}, None},
  PlotRange -> {{0, 2.8}, {65, -partialgenes + 1 - 65}},
  DisplayFunction -> Identity],
  g = FullGraphics[g],
  g[[1, 2]] = g[[1, 2]] /.
  Text[labely, {b_, c_}, {1., 0.}] ->
  Text[labely, {b, c}, {0, 0}, {0, 1}],
  g[[1, 2]] = g[[1, 2]] /.
  Text[labelx, {b_, c_}, {0., -1.}] ->
  Text[labelx, {b, c + 330}, {0, -1}, {1, 0}],
  g[[1, 2]] = g[[1, 2]] /.
  Text[a_, {b_, c_}, {0., -1.}] ->
  Text[a, {b, c + 142.5}, {0, 0}, {0, 1}],
  p[[n]] = Show[g,
    AspectRatio -> GoldenRatio * 1.2 / 2.5,
    PlotRange -> All,
    DisplayFunction -> Identity]
}, {n, 1, externalarrays}];
matrix = Transpose[matrix];

g2 = Show[Table[p[[a]], {a, 1, externalarrays}],
  DisplayFunction -> Identity];

```

```
(* Display Projection Onto SVD Cell Cycle Subspace *)
```

```
(* Create SVD Sorted External Data 2 D Red & Green Raster Display *)
```

```
contrast = 1.5 * 1.5;
displaying = Table[
  If[contrast * partialexternalmatrix[[i, j]] > 0,
    If[contrast * partialexternalmatrix[[i, j]] < 1,
      {contrast * partialexternalmatrix[[i, j]], 0}, {1, 0}],
    If[contrast * partialexternalmatrix[[i, j]] > -1,
      {0, -contrast * partialexternalmatrix[[i, j]]}, {0, 1}]],
  {i, 1, partialgenes}, {j, 1, externalarrays}];
framex = Table[{a - 0.5, externalarraynames[[1, a]]}, {a, 1, externalarrays}];
labelx = "Samples";
labely = ColumnForm[{" ", " ORFs", " ", " ", " ", " ", " "}, Center];
g = Show[
  Graphics[
    RasterArray[
      Table[
        RGBColor[displaying[[i, j, 1]], displaying[[i, j, 2]], 0],
        {i, partialgenes, 1, -1}, {j, 1, externalarrays}]]],
  AspectRatio -> 1,
  Frame -> True,
  FrameTicks -> {None, None, framex, None},
  FrameLabel -> {None, labely, labelx, None},
  GridLines -> {None, None},
  DisplayFunction -> Identity];

g = FullGraphics[g];
g[[1, 2]] = g[[1, 2]] /.
  Text[labely, {b_, c_}, {1., 0.}] ->
  Text[labely, {b, c}, {0, 0}, {0, 1}];
g[[1, 2]] = g[[1, 2]] /.
  Text[labelx, {b_, c_}, {0., -1.}] ->
  Text[labelx, {b, c + 400}, {0, -1}, {1, 0}];
g[[1, 2]] = g[[1, 2]] /.
  Text[a_, {b_, c_}, {0., -1.}] ->
  Text[a, {b, c + 200}, {0, 0}, {0, 1}];
p1 = Show[g,
  AspectRatio -> GoldenRatio * 1.2,
  PlotRange -> All,
  DisplayFunction -> Identity];
```

(\* Create SVD Reconstructed Sorted External Data 2D Red & Green Raster Display \*)

```

contrast = 10 * 1.5;
displaying = Table[
  If[contrast * matrix[[i, j]] > 0,
    If[contrast * matrix[[i, j]] < 1, {contrast * matrix[[i, j]], 0}, {1, 0}],
    If[contrast * matrix[[i, j]] > -1, {0, -contrast * matrix[[i, j]]}, {0, 1}]],
  {i, 1, partialgenes}, {j, 1, externalarrays}];
framex = Table[{a - 0.5, externalarraynames[[1, a]]}, {a, 1, externalarrays}];
labelx = "Samples";
labely = ColumnForm[{" ", "          ORFs", " ", " ", " ", " ", " "}, Center];
g = Show[
  Graphics[
    RasterArray[
      Table[
        RGBColor[displaying[[i, j, 1]], displaying[[i, j, 2]], 0],
        {i, partialgenes, 1, -1}, {j, 1, externalarrays}]]],
  AspectRatio -> 1,
  Frame -> True,
  FrameTicks -> {None, None, framex, None},
  FrameLabel -> {None, labely, labelx, None},
  GridLines -> {None, None},
  DisplayFunction -> Identity];

g = FullGraphics[g];
g[[1, 2]] = g[[1, 2]] /.
  Text[labely, {b_, c_}, {1., 0.}] ->
  Text[labely, {b, c}, {0, 0}, {0, 1}];
g[[1, 2]] = g[[1, 2]] /.
  Text[a_, {b_, c_}, {1., 0.}] ->
  Text[a, {b - 1.8, c}, {0, 0}, {0, 1}];
g[[1, 2]] = g[[1, 2]] /.
  Text[labelx, {b_, c_}, {0., -1.}] ->
  Text[labelx, {b, c + 400}, {0, -1}, {1, 0}];
g[[1, 2]] = g[[1, 2]] /.
  Text[a_, {b_, c_}, {0., -1.}] ->
  Text[a, {b, c + 200}, {0, 0}, {0, 1}];
p2 = Show[g,
  AspectRatio -> GoldenRatio * 1.2,
  PlotRange -> All,
  DisplayFunction -> Identity];

```

```
(* Create SVD Sorted Eigenarrays 2 D Red & Green Raster Display *)
```

```
contrast = 10 * 15;
displaying = Table[
  If[contrast * partialeigenarrays[[i, j]] > 0,
    If[contrast * partialeigenarrays[[i, j]] < 1,
      {contrast * partialeigenarrays[[i, j]], 0}, {1, 0}],
    If[contrast * partialeigenarrays[[i, j]] > -1,
      {0, -contrast * partialeigenarrays[[i, j]]}, {0, 1}]],
  {i, 1, partialgenes}, {j, 1, 9}];
framex = Table[{a - 0.5, StringJoin[ToString[a], "  "]}, {a, 1, 9}];
labelx = "Eigenarrays";
labeled = ColumnForm[{" ", "          ORFs", " ", " ", " ", " ", " "}, Center];
g = Show[
  Graphics[
    RasterArray[
      Table[
        RGBColor[displaying[[i, j, 1]], displaying[[i, j, 2]], 0],
        {i, partialgenes, 1, -1}, {j, 1, 9}]]],
  AspectRatio -> 1,
  Frame -> True,
  FrameTicks -> {None, None, framex, None},
  FrameLabel -> {None, labeled, labelx, None},
  GridLines -> {None, None},
  DisplayFunction -> Identity];

g = FullGraphics[g];
g[[1, 2]] = g[[1, 2]] /.
  Text[labeled, {b_, c_}, {1., 0.}] ->
  Text[labeled, {b, c}, {0, 0}, {0, 1}];
g[[1, 2]] = g[[1, 2]] /.
  Text[labelx, {b_, c_}, {0., -1.}] ->
  Text[labelx, {b, c + 400}, {0, -1}, {1, 0}];
g[[1, 2]] = g[[1, 2]] /.
  Text[a_, {b_, c_}, {0., -1.}] ->
  Text[a, {b, c + 200}, {0, 0}, {0, 1}];
p3 = Show[g,
  AspectRatio -> GoldenRatio * 1.2 * 1.5,
  PlotRange -> All,
  DisplayFunction -> Identity];
```

(\* Create Eigenarrays Contributions to External Arrays 2 D Red & Green Raster Display \*)

```

contrast = 0.5;
displaying = Table[
  If[contrast * externalarraycorrelations[[i, j]] > 0,
    If[contrast * externalarraycorrelations[[i, j]] < 1,
      {contrast * externalarraycorrelations[[i, j]], 0}, {1, 0}],
    If[contrast * externalarraycorrelations[[i, j]] > -1,
      {0, -contrast * externalarraycorrelations[[i, j]]}, {0, 1}]],
  {i, 1, 9}, {j, 1, externalarrays}];
framex = Table[{a - 0.5, externalarraynames[[1, a]]}, {a, 1, externalarrays}];
framey = Table[{a + 0.5, ToString[9 - a]}, {a, 0, 8}];
labely = ColumnForm[{" ", "Eigenarrays", " "}, Center];
labelx = ColumnForm[{"Samples", " ", " "}, Center];
g = Show[
  Graphics[
    RasterArray[
      Table[
        RGBColor[displaying[[i, j, 1]], displaying[[i, j, 2]], 0],
        {i, 9, 1, -1}, {j, 1, externalarrays}]]],
  AspectRatio -> 1,
  Frame -> True,
  FrameTicks -> {None, framey, framex, None},
  FrameLabel -> {None, labely, labelx, None},
  DisplayFunction -> Identity];
g = FullGraphics[g];
g[[1, 2]] = g[[1, 2]] /.
  Text[labely, {b_, c_}, {1., 0.}] ->
  Text[labely, {b - 3, c}, {0, 0}, {0, 1}];
g[[1, 2]] = g[[1, 2]] /.
  Text[labelx, {b_, c_}, {0., -1.}] ->
  Text[labelx, {b, c + 0.8}, {0, -1}, {1, 0}];
g[[1, 2]] = g[[1, 2]] /.
  Text[a_, {b_, c_}, {0., -1.}] ->
  Text[a, {b, c + 1.6}, {0, 0}, {0, 1}];
p4 = Show[g,
  AspectRatio -> 1.05 / 1.5,
  PlotRange -> All,
  DisplayFunction -> Identity];

```

```
(* Display SVD Pseudoinverse Correlations *)
```

```
(* Create SVD Correlations Red and Green Raster Display *)
```

```
contrast = 0.5;
displaying = Table[
  If[contrast * externalarraycorrelations[[i, j]] > 0,
    If[contrast * externalarraycorrelations[[i, j]] < 1,
      {contrast * externalarraycorrelations[[i, j]], 0}, {1, 0}],
    If[contrast * externalarraycorrelations[[i, j]] > -1,
      {0, -contrast * externalarraycorrelations[[i, j]]}, {0, 1}]],
  {i, 1, 9}, {j, 1, externalarrays}];
framex = Table[{a - 0.5, externalarraynames[[1, a]]}, {a, 1, externalarrays}];
framey = Table[{a + 0.5, ToString[9 - a]}, {a, 0, 8}];
labely = ColumnForm[{"(a) Eigenarrays"}, Center];
labelx = ColumnForm[{"Samples"}, Center];
g = Show[
  Graphics[
    RasterArray[
      Table[
        RGBColor[displaying[[i, j, 1]], displaying[[i, j, 2]], 0],
        {i, 9, 1, -1}, {j, 1, externalarrays}]]],
  AspectRatio -> 1,
  Frame -> True,
  FrameTicks -> {None, framey, framex, None},
  FrameLabel -> {None, labely, labelx, None},
  DisplayFunction -> Identity];
g = FullGraphics[g];
g[[1, 2]] = g[[1, 2]] /.
  Text[labely, {b_, c_}, {1., 0.}] ->
  Text[labely, {b - 2, c}, {0, 0}, {0, 1}];
g[[1, 2]] = g[[1, 2]] /.
  Text[labelx, {b_, c_}, {0., -1.}] ->
  Text[labelx, {b, c + 2}, {0, -1}, {1, 0}];
g[[1, 2]] = g[[1, 2]] /.
  Text[a_, {b_, c_}, {0., -1.}] ->
  Text[a, {b, c + 1}, {0, 0}, {0, 1}];
f1 = Show[g,
  PlotRange -> All,
  AspectRatio -> 1 / GoldenRatio * 1.25,
  DisplayFunction -> Identity];
```

```
(* Create SVD Correlations Graph Display *)
```

```
p = Table[0, {a, 1, 2}];
color = {
  RGBColor[0, 0.5, 0],
  RGBColor[1, 0, 0],
  RGBColor[0, 0, 1]};
labelx = ColumnForm[{" "}, Center];
labely = ColumnForm[{"(b) Correlation"}, Center];
framex = Table[{a - 1, " "}, {a, 1, externalarrays}];
framey = Table[a, {a, -5, 5, 5}];

matrixplot = {
  -Sqrt[Dot[
    externalarraycorrelations[[1]],
    externalarraycorrelations[[1]]]] /
  2 * Sin[Pi * (x + 1) / 4],
  Sqrt[Dot[
    externalarraycorrelations[[2]],
    externalarraycorrelations[[2]]]] /
  2 * Cos[Pi * x / 4]};
```

```

Do[{
  graph = Plot[matrixplot[[n]],
    {x, 0, 8},
    PlotStyle -> {color[[Mod[n, 3] + 1]], Dashing[{0.03, 0.02}]},
    DisplayFunction -> Identity],
  coordinates = Table[{a - 1,
    externalarraycorrelations[[n, a]],
    {a, 1, externalarrays}},
  points = Table[Point[coordinates[[a]], {a, 1, externalarrays}],
  line = Line[coordinates],
  g = Show[
    {Graphics[{color[[Mod[n, 3] + 1]], PointSize[0.022], points}],
    Graphics[{color[[Mod[n, 3] + 1]], line}],
    graph},
  Frame -> True,
  FrameLabel -> {None, labely, labelx, None},
  GridLines -> {{{8.5, RGBColor[0, 0, 0]}}, {{0, RGBColor[0, 0, 0]}}},
  FrameTicks -> {None, framey, framex, None},
  PlotRange -> {-5.001, 5.001},
  DisplayFunction -> Identity],
  g = FullGraphics[g],
  g[[1, 2]] = g[[1, 2]] /.
  Text[labely, {b_, c_}, {1., 0.}] ->
  Text[labely, {b - 1.75, c}, {0, 0}, {0, 1}],
  g[[1, 2]] = g[[1, 2]] /.
  Text[labelx, {b_, c_}, {0., -1.}] ->
  Text[labelx, {b, c + 1.5}, {0, -1}, {1, 0}],
  g[[1, 2]] = g[[1, 2]] /.
  Text[a_, {b_, c_}, {0., -1.}] ->
  Text[a, {b, c + 0.75}, {0, 0}, {0, 1}],
  p[[n]] = Show[g,
    PlotRange -> All,
    AspectRatio -> 1 / GoldenRatio * 1.25,
    DisplayFunction -> Identity]
}, {n, 1, 2}];
f2 = Show[Table[p[[a]], {a, 1, 2}],
  DisplayFunction -> Identity];

```

```
(* Display SVD Pseudoinverse Correlations
Between Replication Initiation Proteins and Transcription Factors *)
```

```
(* Create SVD Correlations Red and Green Raster Display *)
```

```
contrast = 40;
displaying = Table[
  If[contrast * arraycontributions12[[i, j]] > 0,
    If[contrast * arraycontributions12[[i, j]] < 1,
      {contrast * arraycontributions12[[i, j]], 0}, {1, 0}],
    If[contrast * arraycontributions12[[i, j]] > -1,
      {0, -contrast * arraycontributions12[[i, j]]}, {0, 1}]],
  {i, 1, 4}, {j, 1, 9}];
framex = Table[{a - 0.5, externalarraynames[[1, a]]}, {a, 1, 9}];
framey = Table[{13 - a + 0.5, externalarraynames[[1, a]]}, {a, 10, 13}];
labely = ColumnForm[{"(d) Samples"}, Center];
labelx = ColumnForm[{"Samples"}, Center];
g = Show[
  Graphics[
    RasterArray[
      Table[
        RGBColor[displaying[[i, j, 1]], displaying[[i, j, 2]], 0],
        {i, 4, 1, -1}, {j, 1, 9}]]],
  AspectRatio -> 1,
  Frame -> True,
  FrameTicks -> {None, framey, framex, None},
  FrameLabel -> {None, labely, labelx, None},
  DisplayFunction -> Identity];
g = FullGraphics[g];
g[[1, 2]] = g[[1, 2]] /.
  Text[labely, {b_, c_}, {1., 0.}] ->
  Text[labely, {b - 1.73, c}, {0, 0}, {0, 1}];
g[[1, 2]] = g[[1, 2]] /.
  Text[labelx, {b_, c_}, {0., -1.}] ->
  Text[labelx, {b, c + 1.34}, {0, -1}, {1, 0}];
g[[1, 2]] = g[[1, 2]] /.
  Text[a_, {b_, c_}, {0., -1.}] ->
  Text[a, {b, c + 0.67}, {0, 0}, {0, 1}];
h1 = Show[g,
  AspectRatio -> 1 / GoldenRatio,
  PlotRange -> All,
  DisplayFunction -> Identity];
```

```
(* Create SVD Correlations Graph Display *)
```

```
p = Table[0, {a, 1, 4}];
color = {
  RGBColor[0, 0, 1],
  RGBColor[1, 0, 0]
};
framex = Table[{a - 1, " ", " "}, {a, 1, 9}];
```



```

matrixplot = {
  -Sqrt[Dot[
    arraycontributions12[[1]],
    arraycontributions12[[1]]]] /
    2 * Sin[Pi * x / 4],
  -Sqrt[Dot[
    arraycontributions12[[2]],
    arraycontributions12[[2]]]] /
    2 * Sin[Pi * x / 4],
  -Sqrt[Dot[
    arraycontributions12[[3]],
    arraycontributions12[[3]]]] /
    2 * Sin[Pi * x / 4],
  -Sqrt[Dot[
    arraycontributions12[[4]],
    arraycontributions12[[4]]]] /
    2 * Sin[Pi * x / 4]];

labelx = " ";
labely = ColumnForm[{"(e) Correlation"}, Center];
framey = Table[a, {a, -0.025, 0.025, 0.025}];
Do[{
  graph = Plot[matrixplot[[n]],
    {x, 0, 8},
    PlotStyle -> {color[[Mod[n, 2] + 1]], Dashing[{0.03, 0.02}]},
    DisplayFunction -> Identity],
  coordinates = Table[{a - 1,
    arraycontributions12[[n, a]],
    {a, 1, 9}},
  points = Table[Point[coordinates[[a]]], {a, 1, 9}],
  line = Line[coordinates],
  g = Show[
    Graphics[{color[[Mod[n, 2] + 1]], PointSize[0.022], points}],
    Graphics[{color[[Mod[n, 2] + 1]], line}],
    graph],
  Frame -> True,
  FrameLabel -> {None, labely, labelx, None},
  FrameTicks -> {None, framey, framex, None},
  GridLines -> {None, {{0, RGBColor[0, 0, 0]}}},
  PlotRange -> {-0.04, 0.035},
  DisplayFunction -> Identity],
g = FullGraphics[g],
g[[1, 2]] = g[[1, 2]] /.
  Text[labely, {b_, c_}, {1., 0.}] ->
  Text[labely, {b - 1.5, c}, {0, 0}, {0, 1}],
g[[1, 2]] = g[[1, 2]] /.
  Text[labelx, {b_, c_}, {0., -1.}] ->
  Text[labelx, {b, c + 0.0249}, {0, -1}, {1, 0}],
g[[1, 2]] = g[[1, 2]] /.
  Text[a_, {b_, c_}, {0., -1.}] ->
  Text[a, {b, c + 0.0124}, {0, 0}, {0, 1}],
p[[n]] = Show[g,
  AspectRatio -> 1 / GoldenRatio,
  PlotRange -> All,
  DisplayFunction -> Identity],
}, {n, 1, 2}];
h2 = Show[Table[p[[a]], {a, 1, 2}]];

```

```

labelx = " ";
labely = ColumnForm[{"(f) Correlation"}, Center];
framey = Table[a, {a, -0.05, 0.04, 0.025}];
Do[{
  graph = Plot[matrixplot[[n]],
    {x, 0, 8},
    PlotStyle -> {color[[Mod[n, 2] + 1]], Dashing[{0.03, 0.02}]},
    DisplayFunction -> Identity],
  coordinates = Table[{a - 1,
    arraycontributions12[[n, a]]},
    {a, 1, 9}],
  points = Table[Point[coordinates[[a]]], {a, 1, 9}],
  line = Line[coordinates],
  g = Show[
    {Graphics[{color[[Mod[n, 2] + 1]], PointSize[0.022], points}],
    Graphics[{color[[Mod[n, 2] + 1]], line}],
    graph},
  Frame -> True,
  FrameLabel -> {None, labely, labelx, None},
  FrameTicks -> {None, framey, framex, None},
  GridLines -> {None, {{0, RGBColor[0, 0, 0]}}},
  PlotRange -> {-0.055, 0.04},
  DisplayFunction -> Identity],
  g = FullGraphics[g],
  g[[1, 2]] = g[[1, 2]] /.
  Text[labely, {b_, c_}, {1., 0.}] ->
  Text[labely, {b - 1.5, c}, {0, 0}, {0, 1}],
  g[[1, 2]] = g[[1, 2]] /.
  Text[labelx, {b_, c_}, {0., -1.}] ->
  Text[labelx, {b, c + 0.0317}, {0, -1}, {1, 0}],
  g[[1, 2]] = g[[1, 2]] /.
  Text[a_, {b_, c_}, {0., -1.}] ->
  Text[a, {b, c + 0.0158}, {0, 0}, {0, 1}],
  p[[n]] = Show[g,
    AspectRatio -> 1 / GoldenRatio,
    PlotRange -> All,
    DisplayFunction -> Identity],
}, {n, 3, 4}];
h3 = Show[Table[p[[a]], {a, 3, 4}]];

```

(\* Display Correlations of External Arrays with SVD and GSVD Bases \*)

```
Show[GraphicsArray[{q3, q4}], GraphicsSpacing -> -0.06];
```

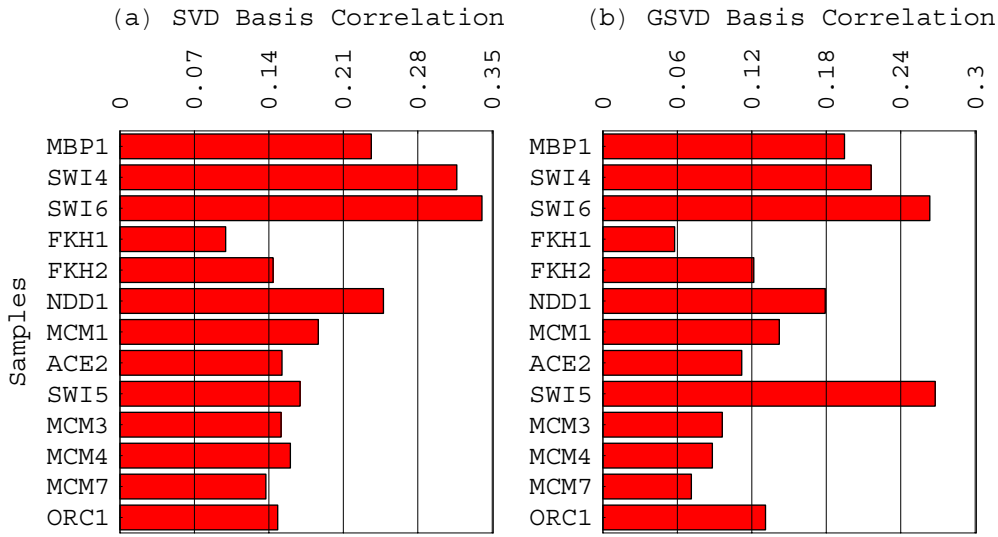

(\* Display Correlations Between SVD- and GSVD-Reconstructed Replication Initiation Proteins and Transcription Factors \*)

```
Show[GraphicsArray[{q5, q6}], GraphicsSpacing -> -0.06];
```

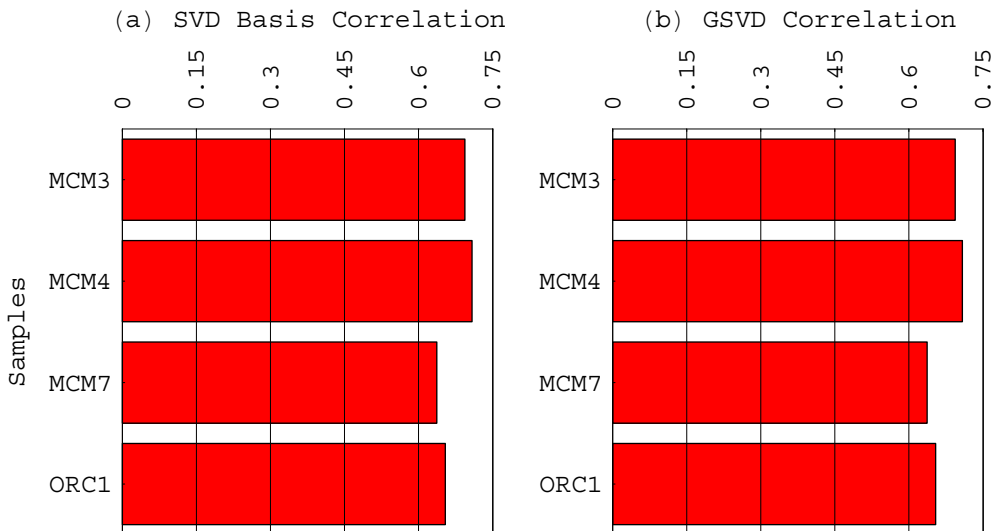

(\* Display SVD and GSVD Reconstructed and Sorted External Data \*)

```
q1 = Show[{
  Graphics[{Rectangle[{0, 0}, {52, 75}, g1]}],
  Graphics[{Rectangle[{50, 0}, {158, 75}, g2]}]},
PlotRange -> All,
DisplayFunction -> Identity];
q2 = Show[{
  Graphics[{Rectangle[{0, 0}, {52, 75}, g3]}],
  Graphics[{Rectangle[{50, 0}, {158, 75}, g4]}]},
PlotRange -> All,
DisplayFunction -> Identity];
Show[GraphicsArray[{{q1}, {q2}}],
GraphicsSpacing -> -0.13];
```

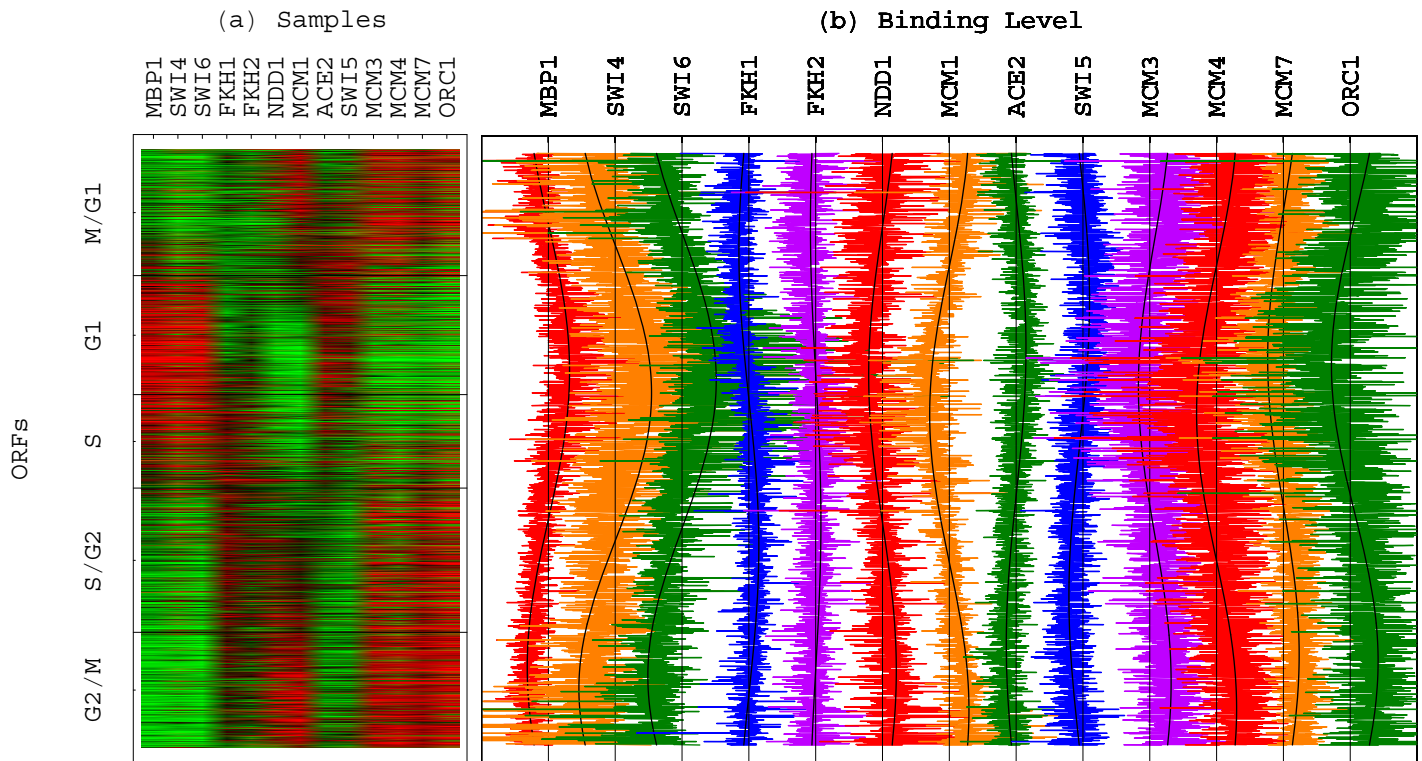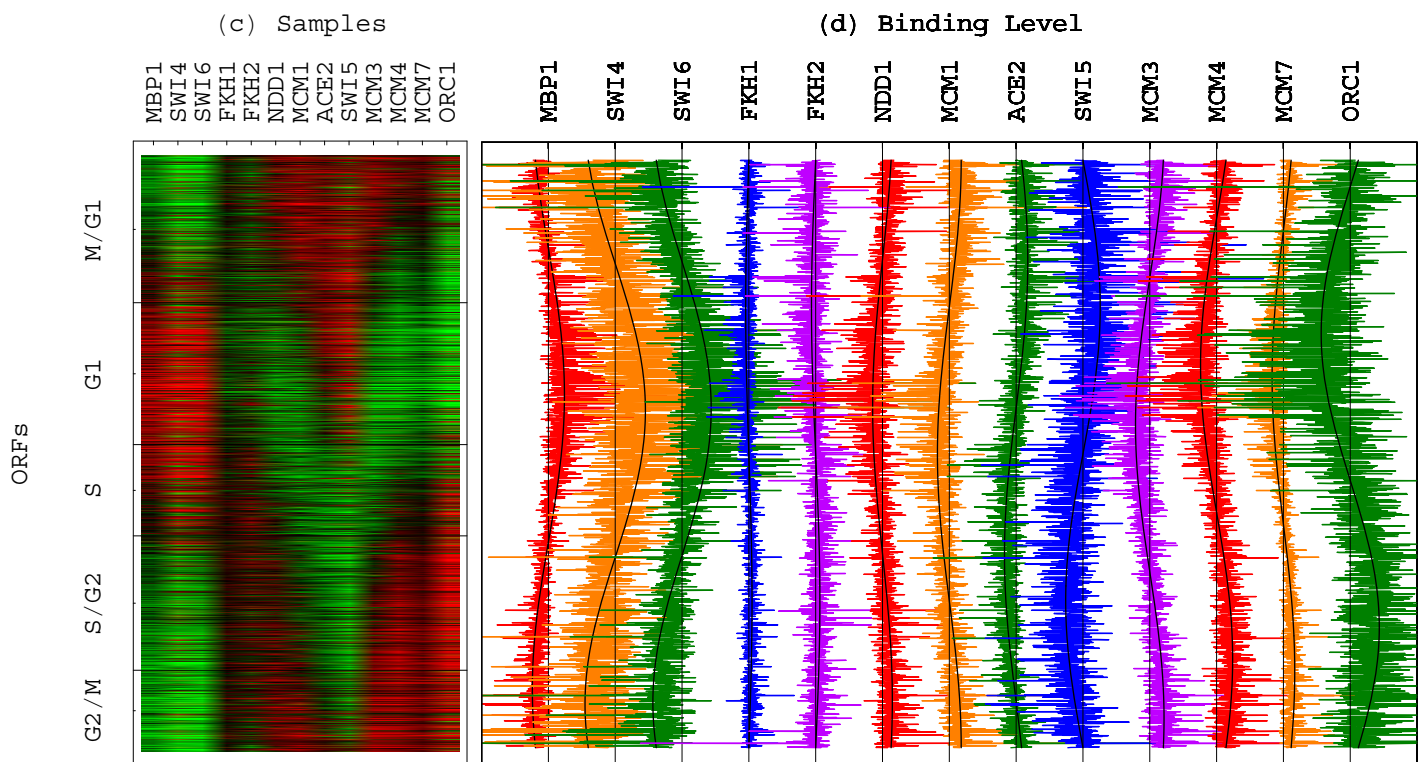

(\* Display SVD and GSVD Pseudoinverse Correlations \*)

```
s1 = Show[GraphicsArray[{{f1}, {f2}}],
GraphicsSpacing -> -0.1,
DisplayFunction -> Identity];
s2 = Show[GraphicsArray[{{f3}, {f4}, {f5}}],
GraphicsSpacing -> -0.2,
DisplayFunction -> Identity];
Show[GraphicsArray[{s1, s2}],
GraphicsSpacing -> -0.075];
```

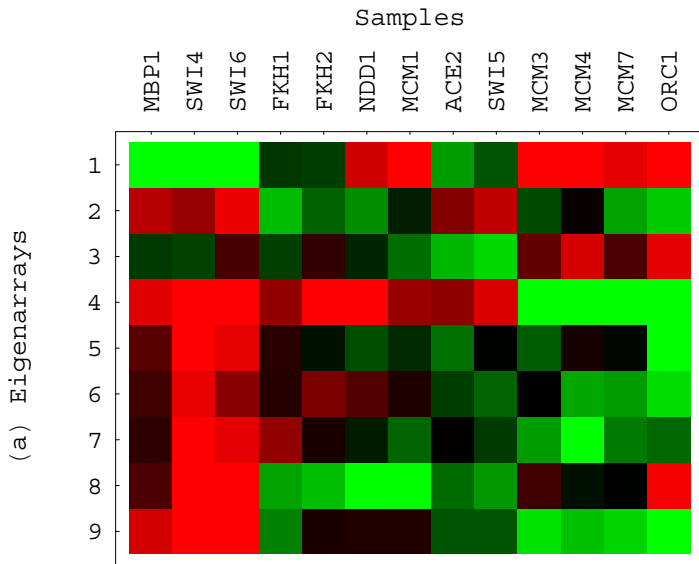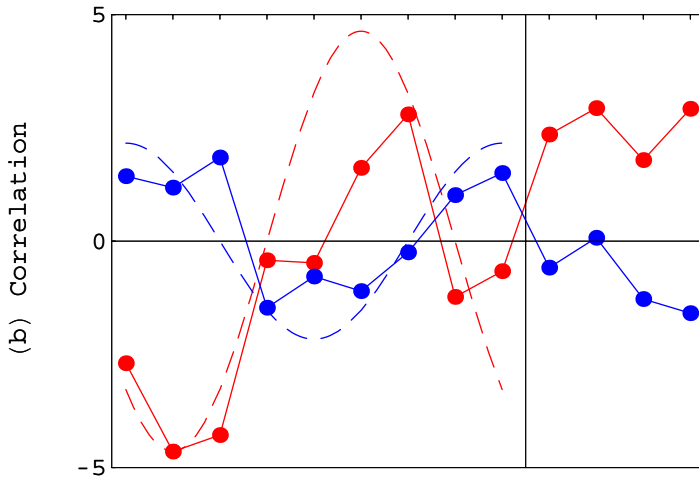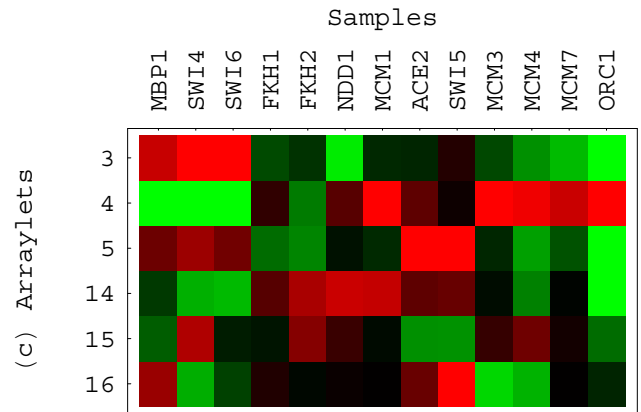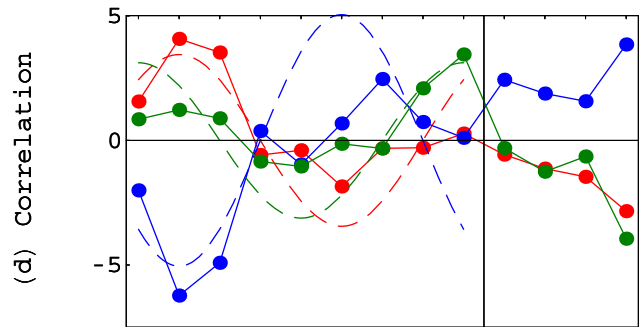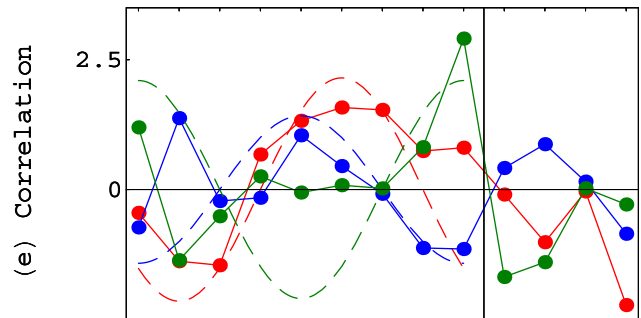

(\* Display SVD and GSVD Pseudoinverse Correlations  
Between Replication Initiation Proteins and Transcription Factors \*)

```
s1 = Show[GraphicsArray[{{h1}, {h2}, {h3}}],
GraphicsSpacing -> -0.25,
DisplayFunction -> Identity];
s2 = Show[GraphicsArray[{{h4}, {h5}, {h6}}],
GraphicsSpacing -> -0.25,
DisplayFunction -> Identity];
Show[GraphicsArray[{s1, s2}],
GraphicsSpacing -> -0.05];
```

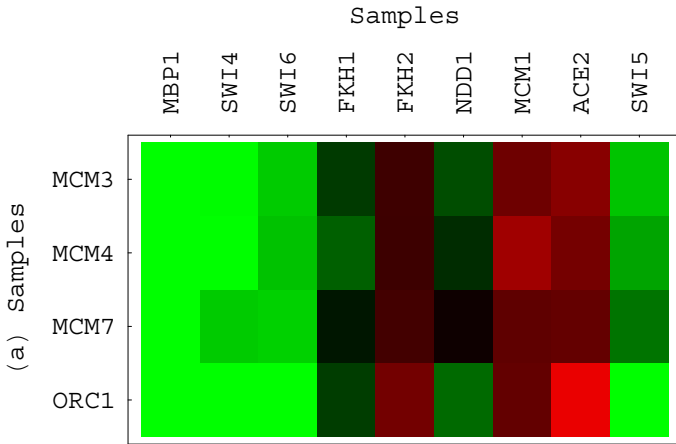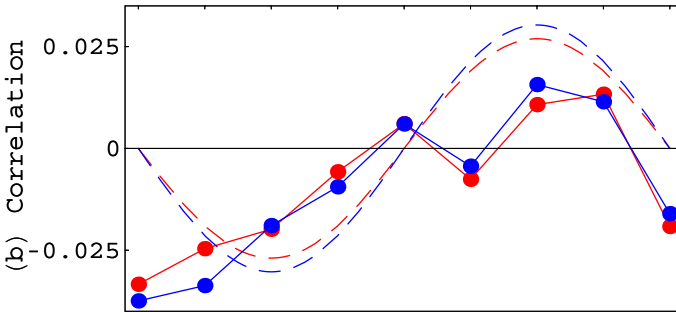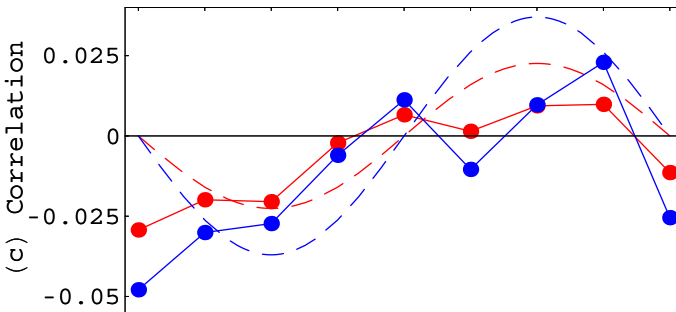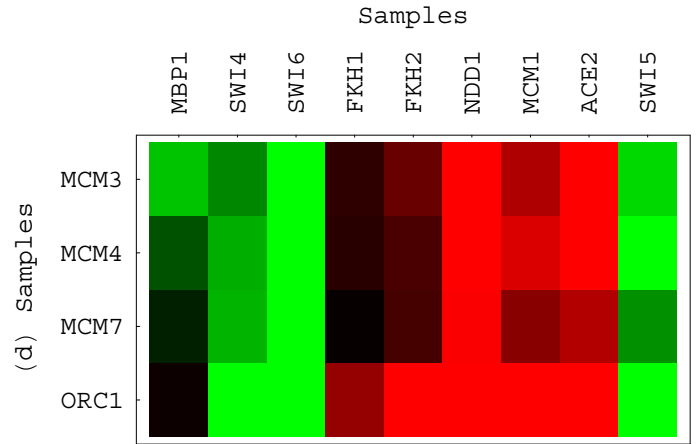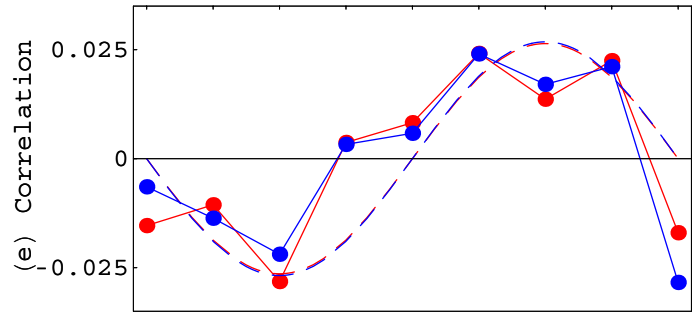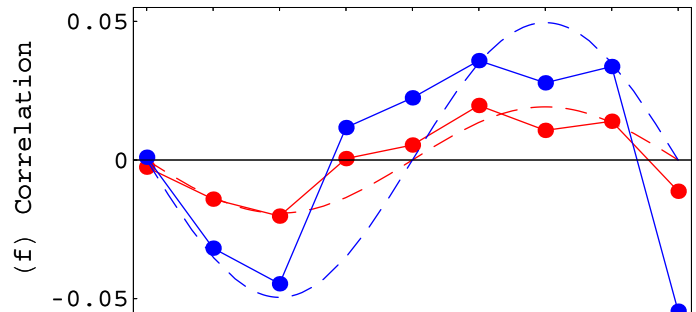

(\* Display Mapping of Protein Binding Data \*)

```
Show[GraphicsArray[{m1, m2}],
GraphicsSpacing -> 0];
```

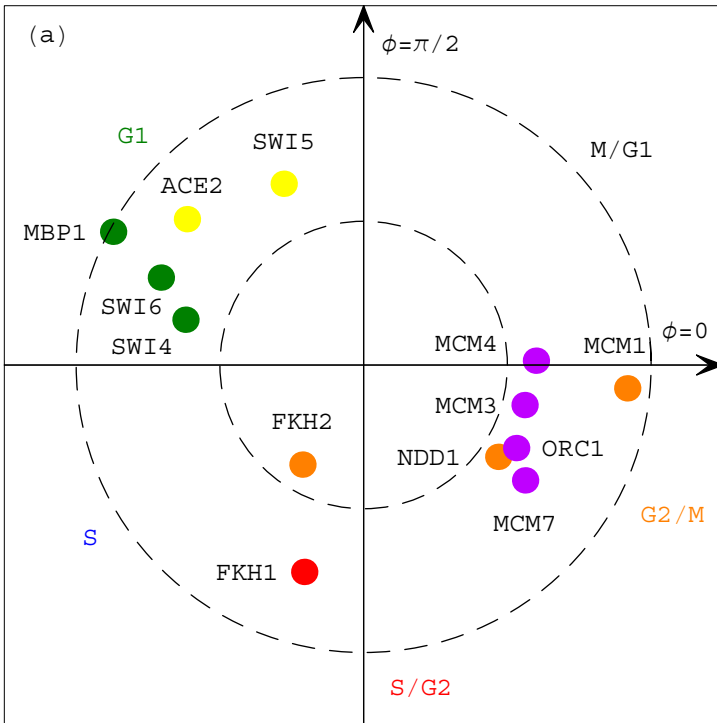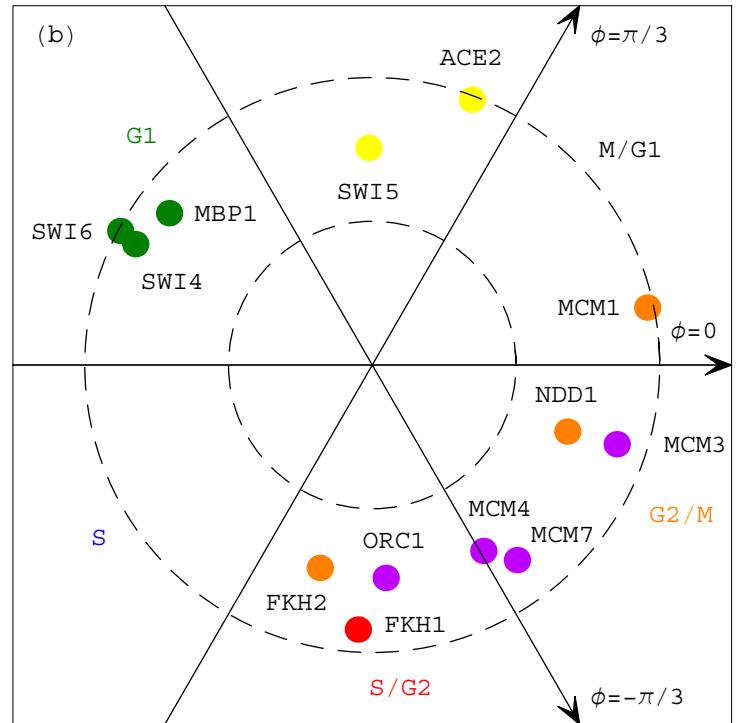



(\* Display Projections Onto SVD and GSVD Cell Cycle Subspaces \*)

```
equal = Show[Graphics[
  Text[StyleForm["=", FontSize -> 20, FontWeight -> Bold], {0, 0}]
], DisplayFunction -> Identity];
times = Show[Graphics[
  Text[StyleForm["x", FontSize -> 20, FontWeight -> Bold], {0, 0}]
], DisplayFunction -> Identity];
rightarrow = Show[Graphics[
  Text[StyleForm["→", FontSize -> 20, FontWeight -> Bold], {0, 0}]
], DisplayFunction -> Identity];

Show[{
  Graphics[{Rectangle[{0, 0}, {100, 200}, p1]}],
  Graphics[{Rectangle[{0, -220}, {100, -20}, p5]}],
  Graphics[{Rectangle[{100, 35}, {130, 200}, rightarrow]}],
  Graphics[{Rectangle[{100, -185}, {130, -20}, rightarrow]}],
  Graphics[{Rectangle[{120, 0}, {220, 200}, p2]}],
  Graphics[{Rectangle[{120, -220}, {220, -20}, p6]}],
  Graphics[{Rectangle[{220, 35}, {240, 200}, equal]}],
  Graphics[{Rectangle[{220, -185}, {240, -20}, equal]}],
  Graphics[{Rectangle[{230, 0}, {305, 200}, p3]}],
  Graphics[{Rectangle[{230, -220}, {292, -20}, p7]}],
  Graphics[{Rectangle[{305, 35}, {325, 200}, times]}],
  Graphics[{Rectangle[{305, -185}, {325, -20}, times]}],
  Graphics[{Rectangle[{315, 75}, {435, 200}, p4]}],
  Graphics[{Rectangle[{315, -126}, {435, -20}, p8]}]
},
PlotRange -> All];
```

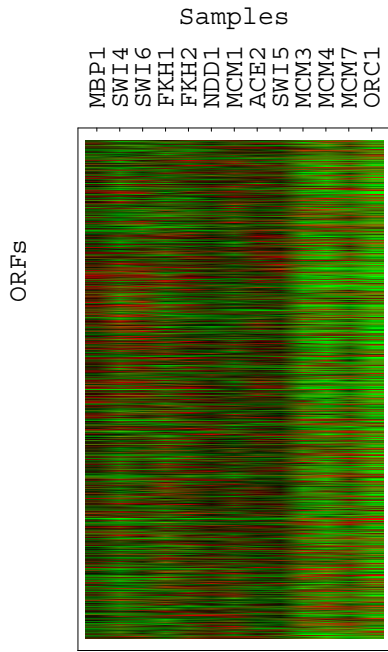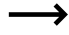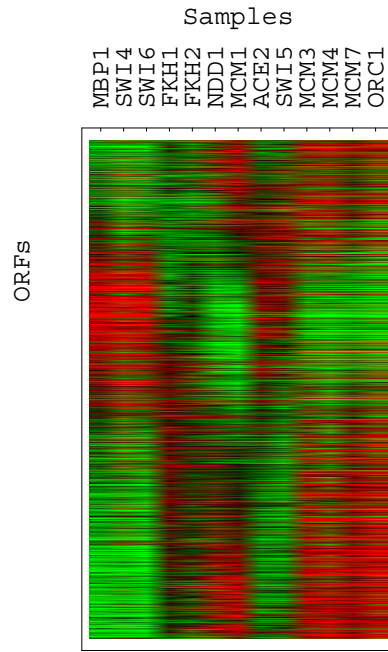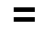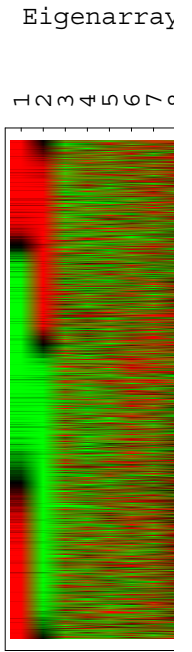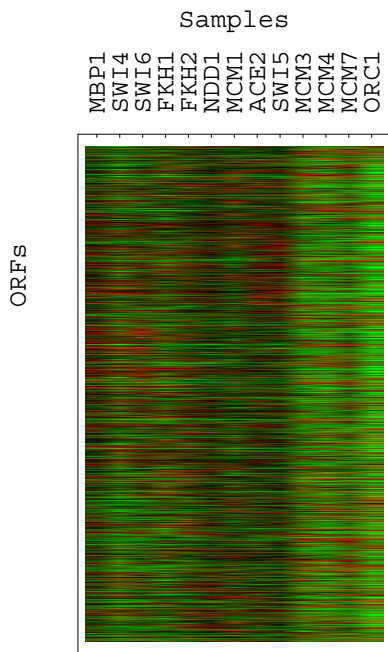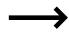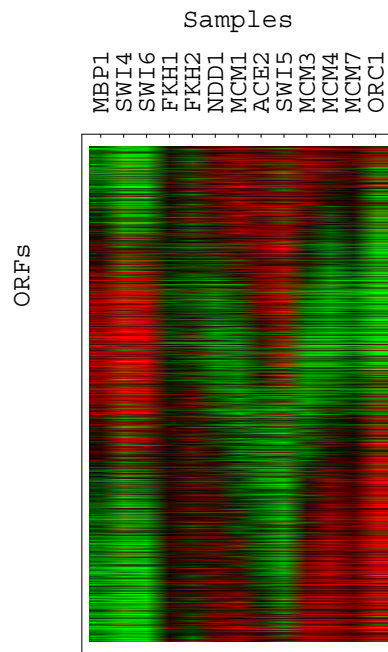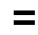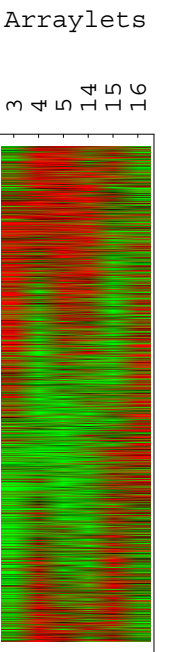

Supplement: pnas_101_47_16577__22.pdf [file pnas_101_47_16577__22.pdf]
