# Supplementary material
Source: PubMed Central journal article supplement (PMC534520)

Samples

MBP1 SWI4 SWI6 FKH1 FKH2 NDD1 MCM1 ACE2 SWI5

(a) Samples

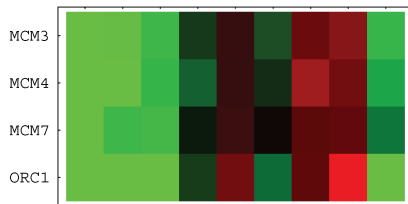

(b) Correlation

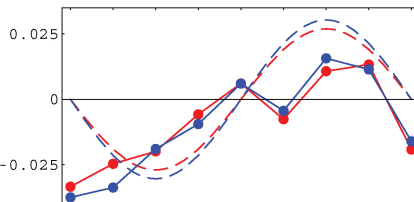

(c) Correlation

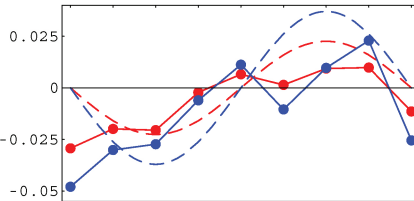

Samples

MBP1 SWI4 SWI6 FKH1 FKH2 NDD1 MCM1 ACE2 SWI5

(d) Samples

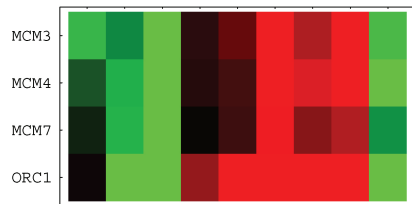

(e) Correlation

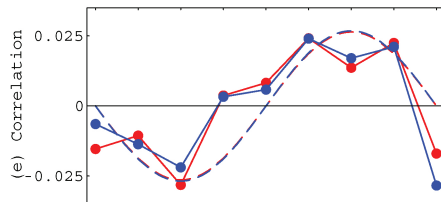

(f) Correlation

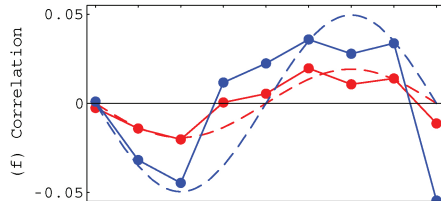

Supplement: pnas_101_47_16577__15.pdf [file pnas_101_47_16577__15.pdf]
