# Supplementary material
Source: PubMed Central journal article supplement (PMC534520)

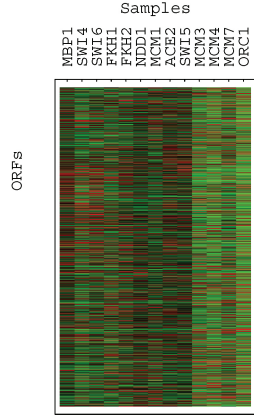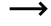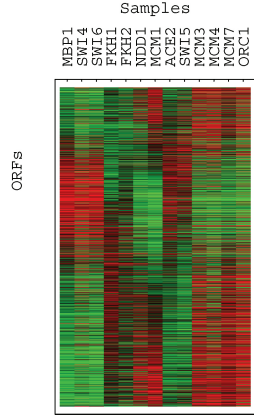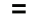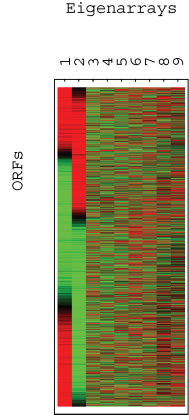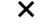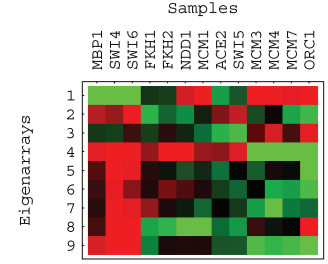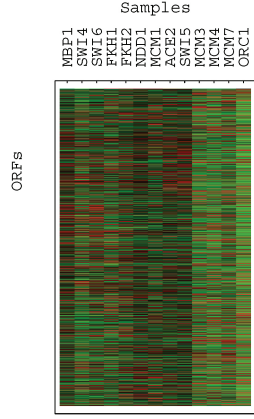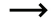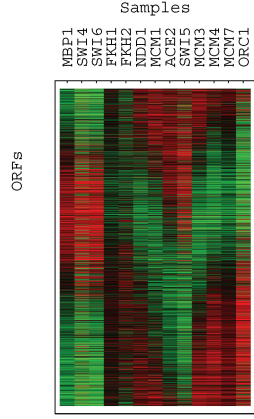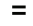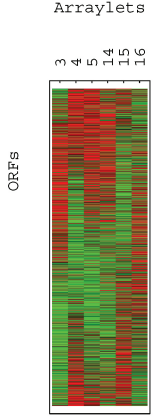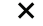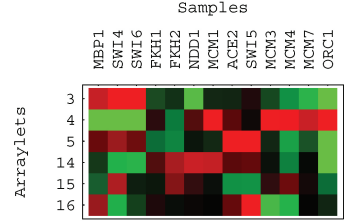

Supplement: pnas_101_47_16577__1.pdf [file pnas_101_47_16577__1.pdf]

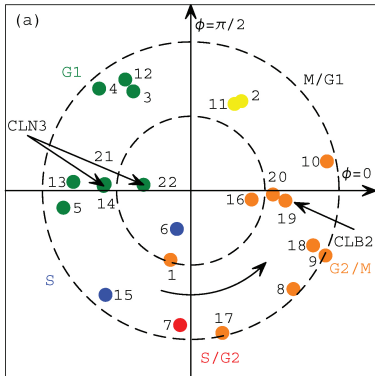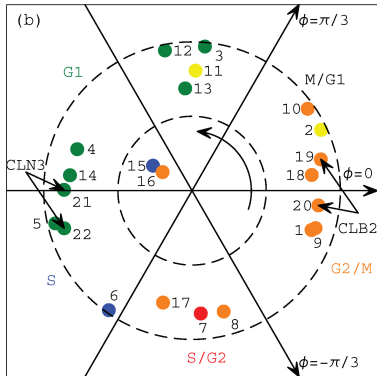

Supplement: pnas_101_47_16577__10.pdf [file pnas_101_47_16577__10.pdf]

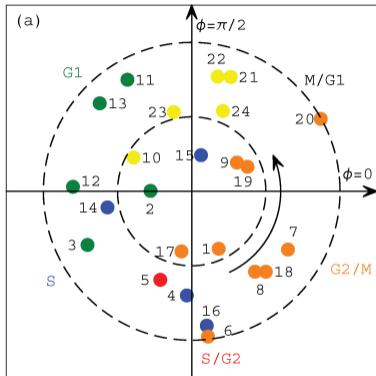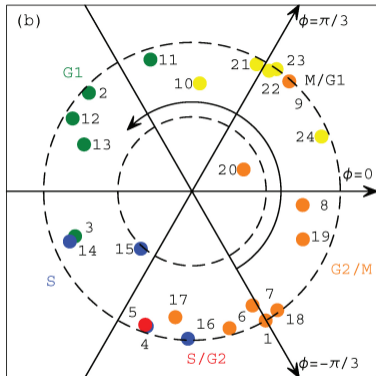

Supplement: pnas_101_47_16577__11.pdf [file pnas_101_47_16577__11.pdf]

# Expression Level

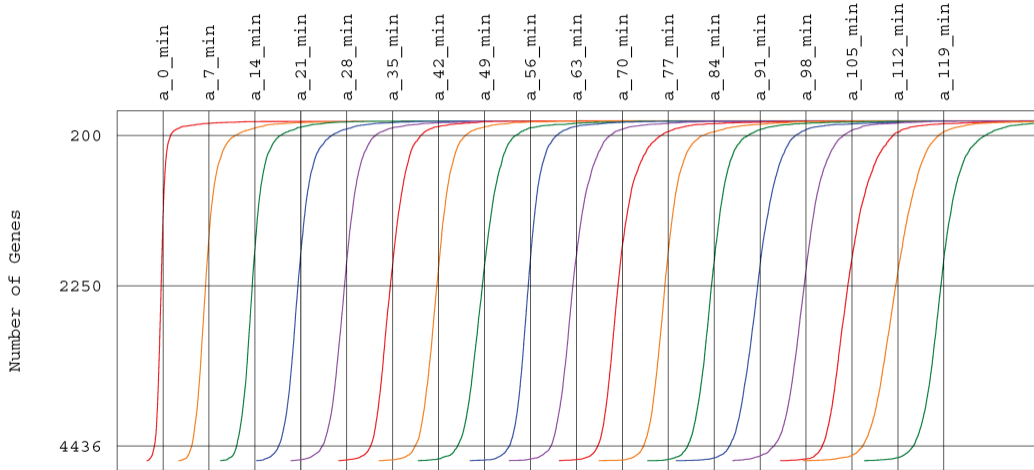

Supplement: pnas_101_47_16577__12.pdf [file pnas_101_47_16577__12.pdf]

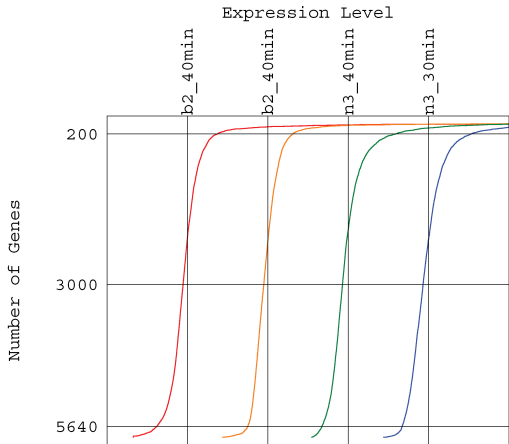

Supplement: pnas_101_47_16577__13.pdf [file pnas_101_47_16577__13.pdf]

# Expression Level

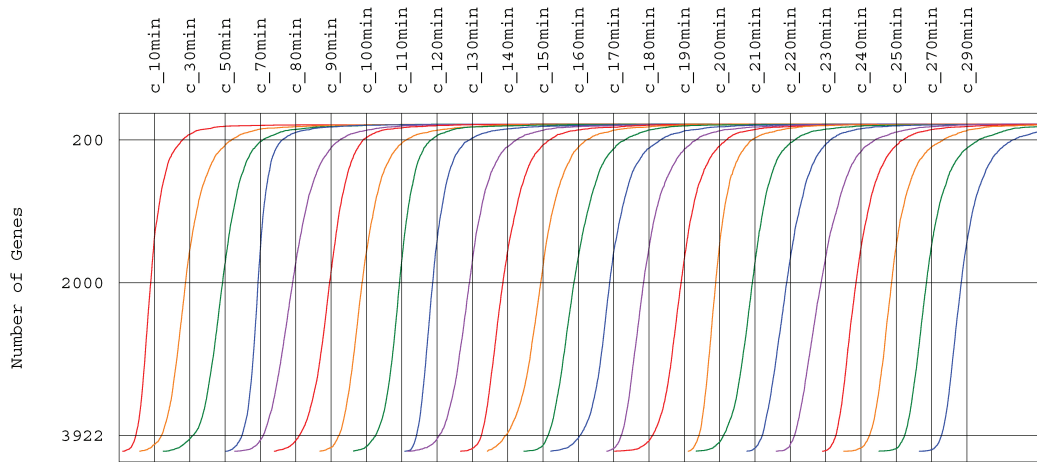

Supplement: pnas_101_47_16577__14.pdf [file pnas_101_47_16577__14.pdf]

(a) SVD Basis Correlation

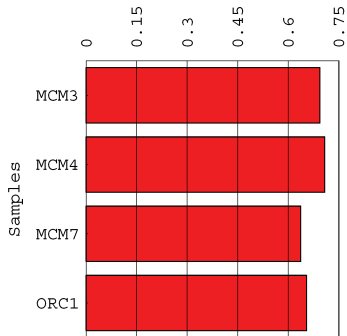

(b) GSVD Correlation

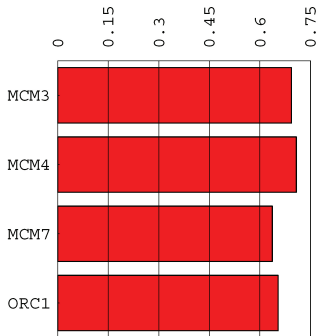

Supplement: pnas_101_47_16577__16.pdf [file pnas_101_47_16577__16.pdf]

(a) SVD Basis Correlation

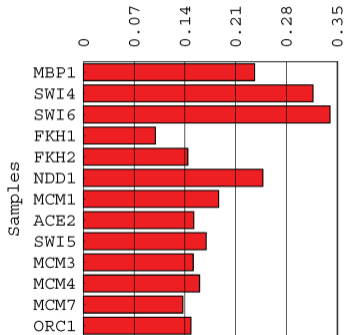

(b) GSVD Basis Correlation

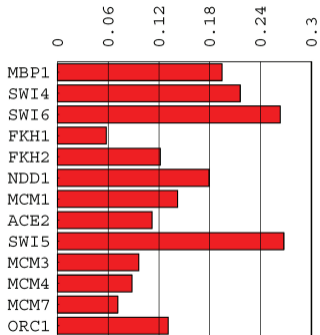

Supplement: pnas_101_47_16577__2.pdf [file pnas_101_47_16577__2.pdf]

Binding Level

MBP1 SWI4 SWI6 FKH1 FKH2 NDD1 MCM1 ACE2 SWI5 MCM3 MCM4 MCM7 ORC1

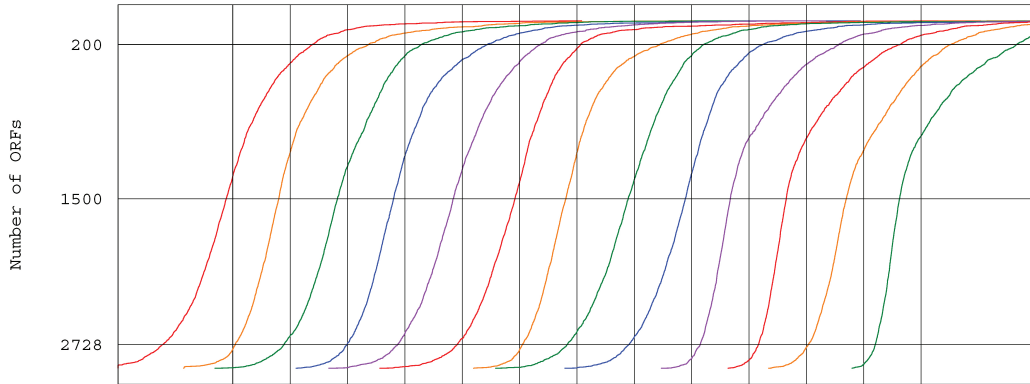

Supplement: pnas_101_47_16577__3.pdf [file pnas_101_47_16577__3.pdf]

(a) SVD Basis Correlation

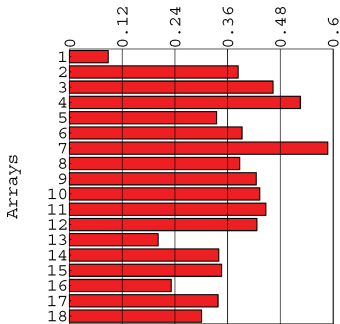

(b) GSVD Basis Correlation

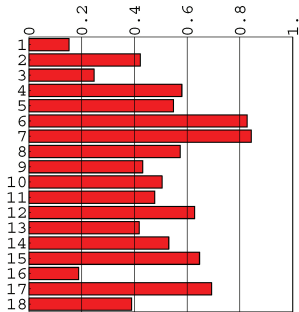

Supplement: pnas_101_47_16577__4.pdf [file pnas_101_47_16577__4.pdf]

(a) SVD Basis Correlation

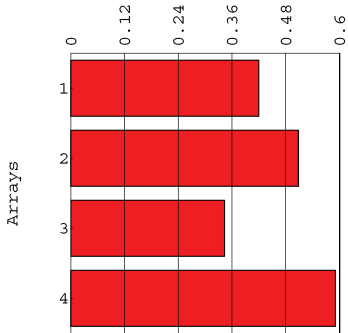

(b) GSVD Basis Correlation

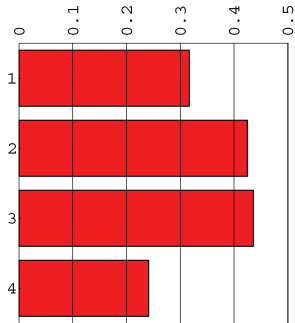

Supplement: pnas_101_47_16577__5.pdf [file pnas_101_47_16577__5.pdf]

Arrays

(a) SVD Basis Correlation

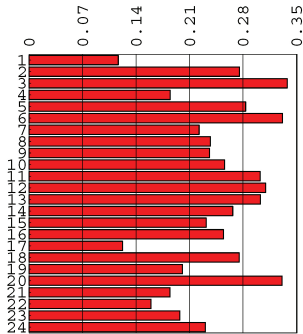

(b) GSVD Basis Correlation

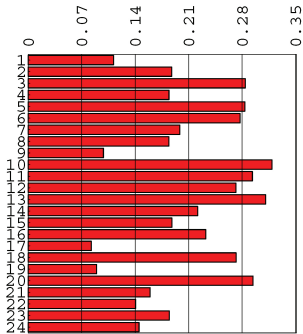

Supplement: pnas_101_47_16577__6.pdf [file pnas_101_47_16577__6.pdf]

(a) Arrays

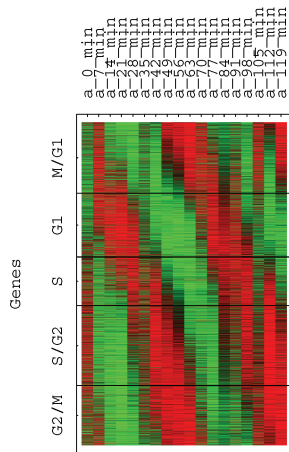

(b) Expression Level

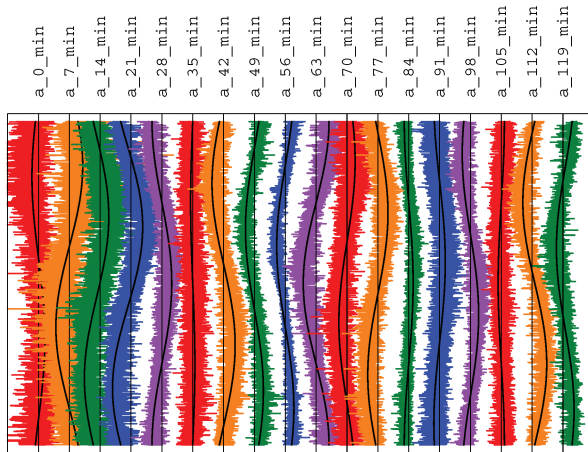

(c) Arrays

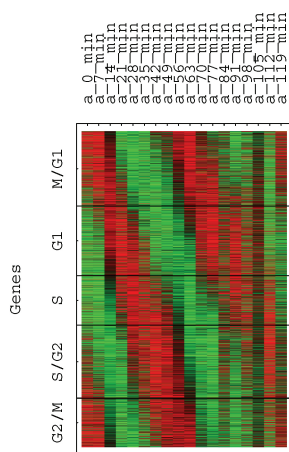

(d) Expression Level

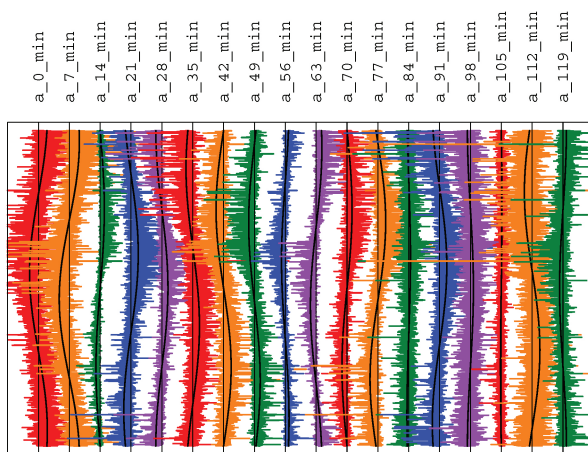

Supplement: pnas_101_47_16577__7.pdf [file pnas_101_47_16577__7.pdf]

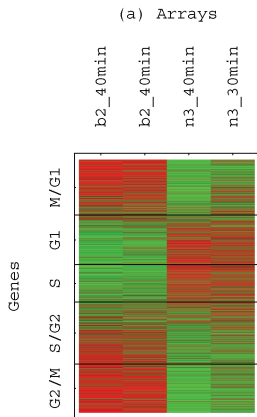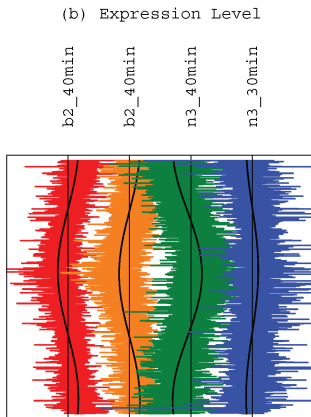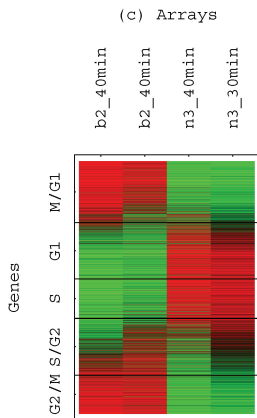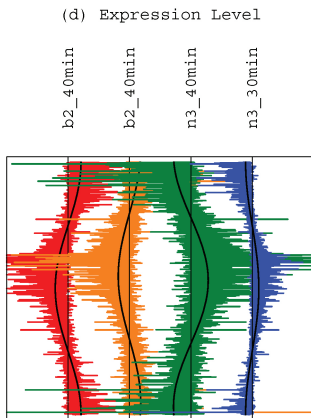

Supplement: pnas_101_47_16577__8.pdf [file pnas_101_47_16577__8.pdf]

(a) Arrays

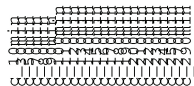

Genes

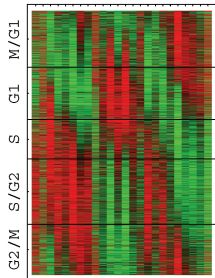

(b) Expression Level

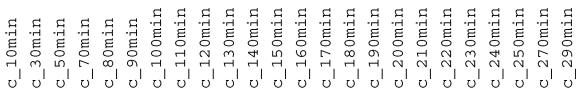

(c) Arrays

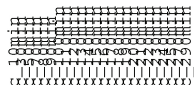

Genes

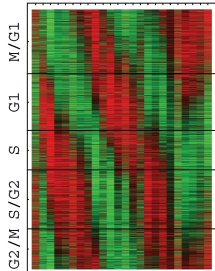

(d) Expression Level

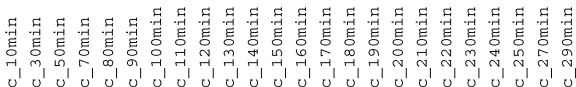

Supplement: pnas_101_47_16577__9.pdf [file pnas_101_47_16577__9.pdf]
